# Supplementary material for: Whole-genome sequencing of CRFK and PG-4 cells to infer the phenotype of the original donor cats
Source: bioRxiv preprint, doi:10.1101/2025.10.31.685720, version 2 (2026-02-23)
Supplement: Supplementary Table S1 [file 685720_file02.xlsx]

## Sheet: Sheet1
WT attttgagatctgcaacaccccttcccacgtgatagctacactac-ttaagggccgcct-
White spotted attttgagatctgcaacaccccttcccacgtgatagctacactac--taagggccgcct-
Cell: Read name and sequence
CRFK:b7c5b596-3c70-45bb-b00c-988c08291521 attttgagatctgcaacaccccttcccacgtgatagctacactac-ttaagggccgcct-
CRFK:4f28cb2e-0b77-4276-927b-22cf1cd859a9 attttgaga-ctgcaacaccccttcccacgtgatagctacactac-ttaagggccgcct-
CRFK:1a121a2d-cbd1-4954-953a-c59b730e8896 attttgagatctgcaacaccccttcccacgtgatagctacactac-ttaagggccgcct-
CRFK:5cc67035-40b4-4180-8075-baa2bb4be3e7 attttgagatctgcaacaccccttcccacgcgatagctacactac-ttaagggccgcct-
PG-4:1d375068-d36d-463b-a23b-b79a65e7211e attttgagatctgcaacacccttccacgtg-gatagctacactactttaagggccgcct-
PG-4:22777b42-f4c6-4e0d-994b-27b1798695bb attttgagatctgcaacacccctttccacgtgatagctacactac-ttaagggccgcct-
PG-4:befbbc54-737b-4de1-802e-a01ed3fea542 attttgagatctgcaacacccctttccacgtgatagctacactac-ttaagggccgcctg
PG-4:9baf3e20-d0e4-4767-94ac-af0d2ef545da attttgagatctgcaacaccccttcccacgtgatagctacactac-ttaagggccgcct-
PG-4:8bc2a176-7ea8-4825-a2f8-488be22f49bf attttgagatctgcaacacccctttccacgtgatagctacactga-ctaagggccgcct-
PG-4:7ed64960-07a4-4574-8739-89a5ecb31ad5 attttgagatctgcaacacccctttccacgtgatagctacactac-ttaagggccgcct-
WT ggggcgggggt-gggagatggagtggaacttt----------------------------
White spotted ggggcgggggt-gggagatggagtggaacttttgttatgccc--aaaattcgtgatcccc
Cell: Read name and sequence
CRFK:b7c5b596-3c70-45bb-b00c-988c08291521 ggggcgggggt-gggagatggagtggaacttt----------------------------
CRFK:4f28cb2e-0b77-4276-927b-22cf1cd859a9 ggggcgggggt-gggagatggagtggaacttt----------------------------
CRFK:1a121a2d-cbd1-4954-953a-c59b730e8896 ggggcgggggt-gggagatggagtggaacttt----------------------------
CRFK:5cc67035-40b4-4180-8075-baa2bb4be3e7 ggggcgggggtggggagatggagtggaacttt----------------------------
PG-4:1d375068-d36d-463b-a23b-b79a65e7211e ggggcgggggt-gggagatggagtggggtttttact------------------------
PG-4:22777b42-f4c6-4e0d-994b-27b1798695bb ggggcgggggt-gggagatggagtggaacttttgttatgccc--aaaattcgtgatcccc
PG-4:befbbc54-737b-4de1-802e-a01ed3fea542 ggggcgggggt-gggagatggagtggaacttttgttatgccc--aaaattcgtgatcccc
PG-4:9baf3e20-d0e4-4767-94ac-af0d2ef545da ggggcgggggt-gggagatggagtggaacttt----------------------------
PG-4:8bc2a176-7ea8-4825-a2f8-488be22f49bf ggggcgggt---gggagatggagtggaacttttgttatgccccaaaaaatcgtgatcccc
PG-4:7ed64960-07a4-4574-8739-89a5ecb31ad5 ggggcgggggt-gggagatggagtggaacttttgttatgccc--aaaattcgtgatcccc
WT ------------------------------------------------------------
White spotted aaagaccaccagggagccgagtccgatgcaaaagcaaagagcctttattcgagctagctc
Cell: Read name and sequence
CRFK:b7c5b596-3c70-45bb-b00c-988c08291521 ------------------------------------------------------------
CRFK:4f28cb2e-0b77-4276-927b-22cf1cd859a9 ------------------------------------------------------------
CRFK:1a121a2d-cbd1-4954-953a-c59b730e8896 ------------------------------------------------------------
CRFK:5cc67035-40b4-4180-8075-baa2bb4be3e7 ------------------------------------------------------------
PG-4:1d375068-d36d-463b-a23b-b79a65e7211e ------------------------------------------------------------
PG-4:22777b42-f4c6-4e0d-994b-27b1798695bb aaagaccaccagggagccgagtccgatgcaaaagcaaagagcctttattcgagctagctc
PG-4:befbbc54-737b-4de1-802e-a01ed3fea542 aaagaccaccagggagccgagtccgatgcaaaagcaaagagcctttattcgagctagctc
PG-4:9baf3e20-d0e4-4767-94ac-af0d2ef545da ------------------------------------------------------------
PG-4:8bc2a176-7ea8-4825-a2f8-488be22f49bf aaagaccaccagggagccgagtccgatgcaaaagcaaagagcctttattc-agctagctc
PG-4:7ed64960-07a4-4574-8739-89a5ecb31ad5 aaagaccaccagggagccgagtccgatgcaaaagcaaagagcctttattcgagctagctc
WT ------------------------------------------------------------
White spotted gagctcaatcccctacctgcaccgacgcagcggtgagataccagggaaagagcacgagtt
Cell: Read name and sequence
CRFK:b7c5b596-3c70-45bb-b00c-988c08291521 ------------------------------------------------------------
CRFK:4f28cb2e-0b77-4276-927b-22cf1cd859a9 ------------------------------------------------------------
CRFK:1a121a2d-cbd1-4954-953a-c59b730e8896 ------------------------------------------------------------
CRFK:5cc67035-40b4-4180-8075-baa2bb4be3e7 ------------------------------------------------------------
PG-4:1d375068-d36d-463b-a23b-b79a65e7211e ------------------------------------------------------------
PG-4:22777b42-f4c6-4e0d-994b-27b1798695bb gagctcaatcccctacctgcaccgacgcagcggtgagataccagggaaagagcacgagtt
PG-4:befbbc54-737b-4de1-802e-a01ed3fea542 gagctcaatcccctacctgcaccgacgcagcggtgagataccagggaaagagcacgagtt
PG-4:9baf3e20-d0e4-4767-94ac-af0d2ef545da ------------------------------------------------------------
PG-4:8bc2a176-7ea8-4825-a2f8-488be22f49bf agtctgcacc-----gctgcaccgacgcagcggtgagataccagggaaagagcacgagtt
PG-4:7ed64960-07a4-4574-8739-89a5ecb31ad5 gagctcaatcccctacctgcaccgacgcagcggtgagataccagggaaagagcacgagtt
WT ------------------------------------------------------------
White spotted tcaaaaaggacaaaggttttattggggcct-gggggcagttggtgaggtaatggctgtgg
Cell: Read name and sequence
CRFK:b7c5b596-3c70-45bb-b00c-988c08291521 ------------------------------------------------------------
CRFK:4f28cb2e-0b77-4276-927b-22cf1cd859a9 ------------------------------------------------------------
CRFK:1a121a2d-cbd1-4954-953a-c59b730e8896 ------------------------------------------------------------
CRFK:5cc67035-40b4-4180-8075-baa2bb4be3e7 ------------------------------------------------------------
PG-4:1d375068-d36d-463b-a23b-b79a65e7211e ------------------------------------------------------------
PG-4:22777b42-f4c6-4e0d-994b-27b1798695bb tcaaaaaggacaaaggttttattggggcct-gggggcagttggtgaggtaatggctgtgg
PG-4:befbbc54-737b-4de1-802e-a01ed3fea542 tcaaaaaggacaaaggttttatccgggcct-gggggcagttggtgaggtaatggctgtgg
PG-4:9baf3e20-d0e4-4767-94ac-af0d2ef545da ------------------------------------------------------------
PG-4:8bc2a176-7ea8-4825-a2f8-488be22f49bf tcaaaaaggacaaaggttttattggggcct-gggggcagttggtgaggtaatggctgtgg
PG-4:7ed64960-07a4-4574-8739-89a5ecb31ad5 tcaaaaaggacaaaggttttattggggcctggggggcagttggtgaggtaatggctgtgg
WT ------------------------------------------------------------
White spotted cctcagctgattggctggggaggggtcctggggaagggtctggcaggtgagggagggttt
Cell: Read name and sequence
CRFK:b7c5b596-3c70-45bb-b00c-988c08291521 ------------------------------------------------------------
CRFK:4f28cb2e-0b77-4276-927b-22cf1cd859a9 ------------------------------------------------------------
CRFK:1a121a2d-cbd1-4954-953a-c59b730e8896 ------------------------------------------------------------
CRFK:5cc67035-40b4-4180-8075-baa2bb4be3e7 ------------------------------------------------------------
PG-4:1d375068-d36d-463b-a23b-b79a65e7211e ------------------------------------------------------------
PG-4:22777b42-f4c6-4e0d-994b-27b1798695bb cctcagctgattggctggggaggggtcctggggaagggtctggcaggtgagggagggttt
PG-4:befbbc54-737b-4de1-802e-a01ed3fea542 cctcagctgattggctggggaggggtcctggggaagggtctggcaggtgagggagggttt
PG-4:9baf3e20-d0e4-4767-94ac-af0d2ef545da ------------------------------------------------------------
PG-4:8bc2a176-7ea8-4825-a2f8-488be22f49bf cctcagctgattggctggggaggggtcctggggaagggtctggcaggtgagggagggttt
PG-4:7ed64960-07a4-4574-8739-89a5ecb31ad5 cctcagctgattggctgggaggg---tctggggaagggtctggcaggtgagggagggttt
WT ------------------------------------------------------------
White spotted actcaaggggaggaggtgtggtcaaggtgaaggacacagaacaagatggcgaggggagga
Cell: Read name and sequence
CRFK:b7c5b596-3c70-45bb-b00c-988c08291521 ------------------------------------------------------------
CRFK:4f28cb2e-0b77-4276-927b-22cf1cd859a9 ------------------------------------------------------------
CRFK:1a121a2d-cbd1-4954-953a-c59b730e8896 ------------------------------------------------------------
CRFK:5cc67035-40b4-4180-8075-baa2bb4be3e7 ------------------------------------------------------------
PG-4:1d375068-d36d-463b-a23b-b79a65e7211e ------------------------------------------------------------
PG-4:22777b42-f4c6-4e0d-994b-27b1798695bb actca-------------------------------------------------------
PG-4:befbbc54-737b-4de1-802e-a01ed3fea542 actca-------------------------------------------------------
PG-4:9baf3e20-d0e4-4767-94ac-af0d2ef545da ------------------------------------------------------------
PG-4:8bc2a176-7ea8-4825-a2f8-488be22f49bf actc--------------------------------------------------------
PG-4:7ed64960-07a4-4574-8739-89a5ecb31ad5 actca-------------------------------------------------------
WT ------------------------------------------------------------
White spotted ggtgtggtcaaggtgaaggacacagaacaagatggcgaggggaggaggtgtggtcaaggt
Cell: Read name and sequence
CRFK:b7c5b596-3c70-45bb-b00c-988c08291521 ------------------------------------------------------------
CRFK:4f28cb2e-0b77-4276-927b-22cf1cd859a9 ------------------------------------------------------------
CRFK:1a121a2d-cbd1-4954-953a-c59b730e8896 ------------------------------------------------------------
CRFK:5cc67035-40b4-4180-8075-baa2bb4be3e7 ------------------------------------------------------------
PG-4:1d375068-d36d-463b-a23b-b79a65e7211e ------------------------------------------------------------
PG-4:22777b42-f4c6-4e0d-994b-27b1798695bb ------------------------------------------------------------
PG-4:befbbc54-737b-4de1-802e-a01ed3fea542 ------------------------------------------------------------
PG-4:9baf3e20-d0e4-4767-94ac-af0d2ef545da ------------------------------------------------------------
PG-4:8bc2a176-7ea8-4825-a2f8-488be22f49bf ------------------------------------------------------------
PG-4:7ed64960-07a4-4574-8739-89a5ecb31ad5 ------------------------------------------------------------
WT ------------------------------------------------------------
White spotted gaaggacacagaacaagatggcgaggggaggaggtgtggtcaaggtgaaggacacagaac
Cell: Read name and sequence
CRFK:b7c5b596-3c70-45bb-b00c-988c08291521 ------------------------------------------------------------
CRFK:4f28cb2e-0b77-4276-927b-22cf1cd859a9 ------------------------------------------------------------
CRFK:1a121a2d-cbd1-4954-953a-c59b730e8896 ------------------------------------------------------------
CRFK:5cc67035-40b4-4180-8075-baa2bb4be3e7 ------------------------------------------------------------
PG-4:1d375068-d36d-463b-a23b-b79a65e7211e ------------------------------------------------------------
PG-4:22777b42-f4c6-4e0d-994b-27b1798695bb ------------------------------------------------------------
PG-4:befbbc54-737b-4de1-802e-a01ed3fea542 ------------------------------------------------------------
PG-4:9baf3e20-d0e4-4767-94ac-af0d2ef545da ------------------------------------------------------------
PG-4:8bc2a176-7ea8-4825-a2f8-488be22f49bf ------------------------------------------------------------
PG-4:7ed64960-07a4-4574-8739-89a5ecb31ad5 ------------------------------------------------------------
WT ------------------------------------------------------------
White spotted aagatggcgaggggaggaggtgtggtcaaggtgaaggacacagaacaagatggcgagggg
Cell: Read name and sequence
CRFK:b7c5b596-3c70-45bb-b00c-988c08291521 ------------------------------------------------------------
CRFK:4f28cb2e-0b77-4276-927b-22cf1cd859a9 ------------------------------------------------------------
CRFK:1a121a2d-cbd1-4954-953a-c59b730e8896 ------------------------------------------------------------
CRFK:5cc67035-40b4-4180-8075-baa2bb4be3e7 ------------------------------------------------------------
PG-4:1d375068-d36d-463b-a23b-b79a65e7211e ------------------------------------------------------------
PG-4:22777b42-f4c6-4e0d-994b-27b1798695bb ---------aggggaggaggtgtggtcaaggtgaaggacacagaacaagatggcgagggg
PG-4:befbbc54-737b-4de1-802e-a01ed3fea542 ---------aggggaggaggtgtggtcaaggtgaaggacacagaacaagatggcgaaggg
PG-4:9baf3e20-d0e4-4767-94ac-af0d2ef545da ------------------------------------------------------------
PG-4:8bc2a176-7ea8-4825-a2f8-488be22f49bf ---------aagggaggaggtgtggtcaaggtgaaggacacagaacaagatggcga-ggg
PG-4:7ed64960-07a4-4574-8739-89a5ecb31ad5 ---------aggggaggaggtgtggtcaaggtgaaggacacagaacaagatggcgagggg
WT ------------------------------------------------------------
White spotted aggaggtgtggtcaaggtgaaggacacagaacaagatggcgaggggaggaggtgtggtca
Cell: Read name and sequence
CRFK:b7c5b596-3c70-45bb-b00c-988c08291521 ------------------------------------------------------------
CRFK:4f28cb2e-0b77-4276-927b-22cf1cd859a9 ------------------------------------------------------------
CRFK:1a121a2d-cbd1-4954-953a-c59b730e8896 ------------------------------------------------------------
CRFK:5cc67035-40b4-4180-8075-baa2bb4be3e7 ------------------------------------------------------------
PG-4:1d375068-d36d-463b-a23b-b79a65e7211e ------------------------------------------------------------
PG-4:22777b42-f4c6-4e0d-994b-27b1798695bb aggaggtgtggtcaaggtgaaggacacagaacaagatggcgaggggaggaggtgtggtca
PG-4:befbbc54-737b-4de1-802e-a01ed3fea542 aggaggtgtggtcaaggtgaaggacacagaacaagatggcgaggggaggaggtgtggtca
PG-4:9baf3e20-d0e4-4767-94ac-af0d2ef545da ------------------------------------------------------------
PG-4:8bc2a176-7ea8-4825-a2f8-488be22f49bf aggaggtgtggtcaaggtgaaggacacagaacaagatggcga-gggaggaggtgtggtca
PG-4:7ed64960-07a4-4574-8739-89a5ecb31ad5 aggaggtgtggtcaaggtgaaggacacagaacaagatggcgaggggaggaggtgtggtca
WT ------------------------------------------------------------
White spotted aggtgaaggtcacagaacaagatggcgacggctggcgtaggcccgccctttcattccccc
Cell: Read name and sequence
CRFK:b7c5b596-3c70-45bb-b00c-988c08291521 ------------------------------------------------------------
CRFK:4f28cb2e-0b77-4276-927b-22cf1cd859a9 ------------------------------------------------------------
CRFK:1a121a2d-cbd1-4954-953a-c59b730e8896 ------------------------------------------------------------
CRFK:5cc67035-40b4-4180-8075-baa2bb4be3e7 ------------------------------------------------------------
PG-4:1d375068-d36d-463b-a23b-b79a65e7211e ------------------------------------------------------------
PG-4:22777b42-f4c6-4e0d-994b-27b1798695bb aggtgaaggtcacagaacaagatggcgacggctggcgtaggcccgccctttcattccccc
PG-4:befbbc54-737b-4de1-802e-a01ed3fea542 aggtgaaggtcacagaacaagatggcgacggctggcgtaggcccgccctttcattccccc
PG-4:9baf3e20-d0e4-4767-94ac-af0d2ef545da ------------------------------------------------------------
PG-4:8bc2a176-7ea8-4825-a2f8-488be22f49bf aggtgaaggtcacagaacaagatggcgacggctggcgtaggcccgccctttcattccccc
PG-4:7ed64960-07a4-4574-8739-89a5ecb31ad5 aggtgaaggtcacagaacaagatggcgacggctggcgtaggcccgccctttcattccccc
WT ------------------------------------------------------------
White spotted cttgtcatgtagcttacggacccaatcatgggaccggctgcatttatggtgacaa-ggag
Cell: Read name and sequence
CRFK:b7c5b596-3c70-45bb-b00c-988c08291521 ------------------------------------------------------------
CRFK:4f28cb2e-0b77-4276-927b-22cf1cd859a9 ------------------------------------------------------------
CRFK:1a121a2d-cbd1-4954-953a-c59b730e8896 ------------------------------------------------------------
CRFK:5cc67035-40b4-4180-8075-baa2bb4be3e7 ------------------------------------------------------------
PG-4:1d375068-d36d-463b-a23b-b79a65e7211e ------------------------------------------------------------
PG-4:22777b42-f4c6-4e0d-994b-27b1798695bb cttgtcatgtagcttacggacccaatcatgggaccggctgcatttatggtgacaa-ggag
PG-4:befbbc54-737b-4de1-802e-a01ed3fea542 cttgtcatgtagcttacggacccaatcatggaaccggctgcatttatggtgacaatggag
PG-4:9baf3e20-d0e4-4767-94ac-af0d2ef545da ------------------------------------------------------------
PG-4:8bc2a176-7ea8-4825-a2f8-488be22f49bf cttgtcatgtagcttacggacccaatcatgggaccggctgcatttatggtgacaa-ggag
PG-4:7ed64960-07a4-4574-8739-89a5ecb31ad5 cttgtcatgtagcttacggacccaatcatgggaccggctgcatttatggtgacaa-ggag
WT ------------------------------------------------------------
White spotted aacagagtctggaggtttacgcaaagttctgggaaccaagagtccctggggcggctctgg
Cell: Read name and sequence
CRFK:b7c5b596-3c70-45bb-b00c-988c08291521 ------------------------------------------------------------
CRFK:4f28cb2e-0b77-4276-927b-22cf1cd859a9 ------------------------------------------------------------
CRFK:1a121a2d-cbd1-4954-953a-c59b730e8896 ------------------------------------------------------------
CRFK:5cc67035-40b4-4180-8075-baa2bb4be3e7 ------------------------------------------------------------
PG-4:1d375068-d36d-463b-a23b-b79a65e7211e ------------------------------------------------------------
PG-4:22777b42-f4c6-4e0d-994b-27b1798695bb aacagagtctggaggtttacgcaaagttctgggaaccaagagtccctggggcggctctgg
PG-4:befbbc54-737b-4de1-802e-a01ed3fea542 aacagagtctggaggtttacgcaaagttctgggaaccaagagtccctggggcggctctgg
PG-4:9baf3e20-d0e4-4767-94ac-af0d2ef545da ------------------------------------------------------------
PG-4:8bc2a176-7ea8-4825-a2f8-488be22f49bf aacagagtctggaggtttacgcagagttctgggaaccaatagttcct-gggtgctcttgg
PG-4:7ed64960-07a4-4574-8739-89a5ecb31ad5 aacagagtctggaggtttacgcaaagttctgggaaccaagagtccctggggcggctctgg
WT ------------------------------------------------------------
White spotted gaggtctgattaagtattgtccccgagctggtgtctatgatctgccaggtgatgttttgg
Cell: Read name and sequence
CRFK:b7c5b596-3c70-45bb-b00c-988c08291521 ------------------------------------------------------------
CRFK:4f28cb2e-0b77-4276-927b-22cf1cd859a9 ------------------------------------------------------------
CRFK:1a121a2d-cbd1-4954-953a-c59b730e8896 ------------------------------------------------------------
CRFK:5cc67035-40b4-4180-8075-baa2bb4be3e7 ------------------------------------------------------------
PG-4:1d375068-d36d-463b-a23b-b79a65e7211e ------------------------------------------------------------
PG-4:22777b42-f4c6-4e0d-994b-27b1798695bb gaggtctgattaagtattgtccccgagctggtgtctatgatctgccaggtgatgttttgg
PG-4:befbbc54-737b-4de1-802e-a01ed3fea542 gaggtctgattaagtattgtccccgagctggtgtctatgatctgccaggtgatgttttgg
PG-4:9baf3e20-d0e4-4767-94ac-af0d2ef545da ------------------------------------------------------------
PG-4:8bc2a176-7ea8-4825-a2f8-488be22f49bf caggtctgatt-agtattgtccccgagctggtgtctatgatctgccaggtgatgttttgg
PG-4:7ed64960-07a4-4574-8739-89a5ecb31ad5 gaggtctgattaagtattgtccccgagctggtgtctatgatctgccaggtgatgttttgg
WT ------------------------------------------------------------
White spotted g-ggcgtggggactcccggcagcatgagcaatgacaagcagagttaacagagttaccaat
Cell: Read name and sequence
CRFK:b7c5b596-3c70-45bb-b00c-988c08291521 ------------------------------------------------------------
CRFK:4f28cb2e-0b77-4276-927b-22cf1cd859a9 ------------------------------------------------------------
CRFK:1a121a2d-cbd1-4954-953a-c59b730e8896 ------------------------------------------------------------
CRFK:5cc67035-40b4-4180-8075-baa2bb4be3e7 ------------------------------------------------------------
PG-4:1d375068-d36d-463b-a23b-b79a65e7211e ------------------------------------------------------------
PG-4:22777b42-f4c6-4e0d-994b-27b1798695bb ggggcgtggggactcccggcagcatgagcaatgacaagcagagttaacagagttaccaat
PG-4:befbbc54-737b-4de1-802e-a01ed3fea542 ggggcgtggggactcccggcagcatgagcaatgacaagcagagttaacagagttaccaat
PG-4:9baf3e20-d0e4-4767-94ac-af0d2ef545da ------------------------------------------------------------
PG-4:8bc2a176-7ea8-4825-a2f8-488be22f49bf g------tgggactcccgg-agcatgagcaatgacag--aggatgaatatgatga-caat
PG-4:7ed64960-07a4-4574-8739-89a5ecb31ad5 ggggcgtggggactcccggcagcatgagcaatgacaagcagagttaacagagttaccaat
WT ------------------------------------------------------------
White spotted attaggtaggtcgaatgcgctgtagcttgagcttgagcgggttgtgtcggtcccgactga
Cell: Read name and sequence
CRFK:b7c5b596-3c70-45bb-b00c-988c08291521 ------------------------------------------------------------
CRFK:4f28cb2e-0b77-4276-927b-22cf1cd859a9 ------------------------------------------------------------
CRFK:1a121a2d-cbd1-4954-953a-c59b730e8896 ------------------------------------------------------------
CRFK:5cc67035-40b4-4180-8075-baa2bb4be3e7 ------------------------------------------------------------
PG-4:1d375068-d36d-463b-a23b-b79a65e7211e ------------------------------------------------------------
PG-4:22777b42-f4c6-4e0d-994b-27b1798695bb attaggtaggtcgaatgcgctgtagcttgagcttgagcgggttgtgtcggtcccgactga
PG-4:befbbc54-737b-4de1-802e-a01ed3fea542 attaggtaggtcgaatgcgctgtagcttgagcttgagcgggttgtgtcggtcccgactga
PG-4:9baf3e20-d0e4-4767-94ac-af0d2ef545da ------------------------------------------------------------
PG-4:8bc2a176-7ea8-4825-a2f8-488be22f49bf attaggtaggtcgaatgcgcggagccttgagtct-agcgggtcgtgccggtgccgactca
PG-4:7ed64960-07a4-4574-8739-89a5ecb31ad5 attaggtaggtcgaatgtgtggagctctgagcttgagcgggttgtgtcggtcccgactga
WT ------------------------------------------------------------
White spotted tggcccatcgcgtgacgaagtccttccggatcgaggaggggtccgctggctgagcgtggg
Cell: Read name and sequence
CRFK:b7c5b596-3c70-45bb-b00c-988c08291521 ------------------------------------------------------------
CRFK:4f28cb2e-0b77-4276-927b-22cf1cd859a9 ------------------------------------------------------------
CRFK:1a121a2d-cbd1-4954-953a-c59b730e8896 ------------------------------------------------------------
CRFK:5cc67035-40b4-4180-8075-baa2bb4be3e7 ------------------------------------------------------------
PG-4:1d375068-d36d-463b-a23b-b79a65e7211e ------------------------------------------------------------
PG-4:22777b42-f4c6-4e0d-994b-27b1798695bb tggcccatcgcgtgacgaagtccttccggatcgaggaggggtccgctggctgagcgtggg
PG-4:befbbc54-737b-4de1-802e-a01ed3fea542 tggcccatcgcgtgacgaagtccttccggatcgaggaggggtccgctggctgagcgtggg
PG-4:9baf3e20-d0e4-4767-94ac-af0d2ef545da ------------------------------------------------------------
PG-4:8bc2a176-7ea8-4825-a2f8-488be22f49bf tggcccatcgcgtgaccgagagctt-cggattgaggaggggtccgctggctgagcgtggg
PG-4:7ed64960-07a4-4574-8739-89a5ecb31ad5 tggcccatcgcgtgacgaagtccttccggatcgaggaggggtccgctggctgagcgtggg
WT ------------------------------------------------------------
White spotted tgtgatggacccaggtcgcgatgccgtctaccttgagagcggtgggggttgtcaacacca
Cell: Read name and sequence
CRFK:b7c5b596-3c70-45bb-b00c-988c08291521 ------------------------------------------------------------
CRFK:4f28cb2e-0b77-4276-927b-22cf1cd859a9 ------------------------------------------------------------
CRFK:1a121a2d-cbd1-4954-953a-c59b730e8896 ------------------------------------------------------------
CRFK:5cc67035-40b4-4180-8075-baa2bb4be3e7 ------------------------------------------------------------
PG-4:1d375068-d36d-463b-a23b-b79a65e7211e ------------------------------------------------------------
PG-4:22777b42-f4c6-4e0d-994b-27b1798695bb tgtgatggacccaggtcgcgatgccgtctaccttgagagcggtgggggttgtcaacacca
PG-4:befbbc54-737b-4de1-802e-a01ed3fea542 tgtgatggacccaggtcgcgatgccgtctaccttgagagcggtgggggttgtcaacacca
PG-4:9baf3e20-d0e4-4767-94ac-af0d2ef545da ------------------------------------------------------------
PG-4:8bc2a176-7ea8-4825-a2f8-488be22f49bf tgtgatggacccaggtcgcgatgccgtctaccttgagagcggtgggggttgtcaacacca
PG-4:7ed64960-07a4-4574-8739-89a5ecb31ad5 tgtgatggacccaggtcgcgatgccgtctaccttgagagcggtgggggttgtcaacacca
WT ------------------------------------------------------------
White spotted cgatgtagggtcccttccagcgcggctcgagagtctctcggtggtgcctcttgac--gta
Cell: Read name and sequence
CRFK:b7c5b596-3c70-45bb-b00c-988c08291521 ------------------------------------------------------------
CRFK:4f28cb2e-0b77-4276-927b-22cf1cd859a9 ------------------------------------------------------------
CRFK:1a121a2d-cbd1-4954-953a-c59b730e8896 ------------------------------------------------------------
CRFK:5cc67035-40b4-4180-8075-baa2bb4be3e7 ------------------------------------------------------------
PG-4:1d375068-d36d-463b-a23b-b79a65e7211e ------------------------------------------------------------
PG-4:22777b42-f4c6-4e0d-994b-27b1798695bb cgatgtagggtcccttccagcgcggctcgagagtctctcggtggtgcctcttgac--gta
PG-4:befbbc54-737b-4de1-802e-a01ed3fea542 cgatgtagggtcccttccagcgcggctcgagagtctctcggtggtgcctcttgac--gta
PG-4:9baf3e20-d0e4-4767-94ac-af0d2ef545da ------------------------------------------------------------
PG-4:8bc2a176-7ea8-4825-a2f8-488be22f49bf cgatgtagggtcccttccagcgcggctcgagagtctctcggtggtgcctcttgactagag
PG-4:7ed64960-07a4-4574-8739-89a5ecb31ad5 cgatgtagggtcccttccagcgcggctcgagagtctctcggtggtgcctcttgac--gta
WT ------------------------------------------------------------
White spotted gacccagtctcccggcctgta--ctgatgaggtgtcgggatcgggccagcctcgtagatg
Cell: Read name and sequence
CRFK:b7c5b596-3c70-45bb-b00c-988c08291521 ------------------------------------------------------------
CRFK:4f28cb2e-0b77-4276-927b-22cf1cd859a9 ------------------------------------------------------------
CRFK:1a121a2d-cbd1-4954-953a-c59b730e8896 ------------------------------------------------------------
CRFK:5cc67035-40b4-4180-8075-baa2bb4be3e7 ------------------------------------------------------------
PG-4:1d375068-d36d-463b-a23b-b79a65e7211e ------------------------------------------------------------
PG-4:22777b42-f4c6-4e0d-994b-27b1798695bb gacccagtctcccggcctgta--ctgatgaggtgtcgggatcgggccagcctcgtagatg
PG-4:befbbc54-737b-4de1-802e-a01ed3fea542 gacccagtctcccggcctgta--ctgatgaggtgtcgggatcgggccagcctcgtagatg
PG-4:9baf3e20-d0e4-4767-94ac-af0d2ef545da ------------------------------------------------------------
PG-4:8bc2a176-7ea8-4825-a2f8-488be22f49bf aacccagtctccctggctgggacctgatgaggtgtcgggatcgggccagcctcgtagatg
PG-4:7ed64960-07a4-4574-8739-89a5ecb31ad5 gacccagtctcccggcctgta--ctgatgaggtgtcgggatcgggccagcctcgtagatg
WT ------------------------------------------------------------
White spotted gcacggaggcgcggccaaatgtcctcgtgcgccctctggagcccgctcaaggaaagaaaa
Cell: Read name and sequence
CRFK:b7c5b596-3c70-45bb-b00c-988c08291521 ------------------------------------------------------------
CRFK:4f28cb2e-0b77-4276-927b-22cf1cd859a9 ------------------------------------------------------------
CRFK:1a121a2d-cbd1-4954-953a-c59b730e8896 ------------------------------------------------------------
CRFK:5cc67035-40b4-4180-8075-baa2bb4be3e7 ------------------------------------------------------------
PG-4:1d375068-d36d-463b-a23b-b79a65e7211e ------------------------------------------------------------
PG-4:22777b42-f4c6-4e0d-994b-27b1798695bb gcacggaggcgcggccaaatgtcctcgtgcgccctctggagcccgctcaaggaaagaaaa
PG-4:befbbc54-737b-4de1-802e-a01ed3fea542 gcacggaggcgcggccaaatgtcctcgtgcgccctctggagcccgctcaaggaaagaaaa
PG-4:9baf3e20-d0e4-4767-94ac-af0d2ef545da ------------------------------------------------------------
PG-4:8bc2a176-7ea8-4825-a2f8-488be22f49bf gcacggaggcgcggccaaacgtccccgtgcgccctctggagcccgctcaaggaaagaaaa
PG-4:7ed64960-07a4-4574-8739-89a5ecb31ad5 gcacggaggcgcggccaaatgtcctcgtgcgccctctggagcccgctcaaggaaagaaaa
WT ------------------------------------------------------------
White spotted agttcttgatctttaaactcagcaataagttcagctcgaaggctgggaataacagggggt
Cell: Read name and sequence
CRFK:b7c5b596-3c70-45bb-b00c-988c08291521 ------------------------------------------------------------
CRFK:4f28cb2e-0b77-4276-927b-22cf1cd859a9 ------------------------------------------------------------
CRFK:1a121a2d-cbd1-4954-953a-c59b730e8896 ------------------------------------------------------------
CRFK:5cc67035-40b4-4180-8075-baa2bb4be3e7 ------------------------------------------------------------
PG-4:1d375068-d36d-463b-a23b-b79a65e7211e ------------------------------------------------------------
PG-4:22777b42-f4c6-4e0d-994b-27b1798695bb agttcttgatctttaaactcagcaataagttcagctcgaaggctgggaataacagggggt
PG-4:befbbc54-737b-4de1-802e-a01ed3fea542 agttcttgatctttaaactcagcaataagttcagctcgaaggctgggaataacagggggt
PG-4:9baf3e20-d0e4-4767-94ac-af0d2ef545da ------------------------------------------------------------
PG-4:8bc2a176-7ea8-4825-a2f8-488be22f49bf agttcttgatctttaaactcagcaataagttcagctcgaaggctgggaataacagggggt
PG-4:7ed64960-07a4-4574-8739-89a5ecb31ad5 agttcttgatctttaaactcagcaataagttcagctcgaaggctgggaataacagggggt
WT ------------------------------------------------------------
White spotted ggcctgccaaacatgatttcgtagggagtaaaacccagagtgtaaggagtgtttctaacc
Cell: Read name and sequence
CRFK:b7c5b596-3c70-45bb-b00c-988c08291521 ------------------------------------------------------------
CRFK:4f28cb2e-0b77-4276-927b-22cf1cd859a9 ------------------------------------------------------------
CRFK:1a121a2d-cbd1-4954-953a-c59b730e8896 ------------------------------------------------------------
CRFK:5cc67035-40b4-4180-8075-baa2bb4be3e7 ------------------------------------------------------------
PG-4:1d375068-d36d-463b-a23b-b79a65e7211e ------------------------------------------------------------
PG-4:22777b42-f4c6-4e0d-994b-27b1798695bb ggcctgccaaacatgatttcgtagggagtaaaacccagagtgtaaggagtgtttctaacc
PG-4:befbbc54-737b-4de1-802e-a01ed3fea542 ggcctgccaaacatgatttcgtagggagtaaaacccagagtgtaaggagtgtttctaacc
PG-4:9baf3e20-d0e4-4767-94ac-af0d2ef545da ------------------------------------------------------------
PG-4:8bc2a176-7ea8-4825-a2f8-488be22f49bf ggcctgccaaacatgatttcgtagggagtaaaacccagagtgtaaggagtgtttctaacc
PG-4:7ed64960-07a4-4574-8739-89a5ecb31ad5 ggcctgccaaacatgatttcgtagggagtaaaacccagagtgtaaggagtgtttctaacc
WT ------------------------------------------------------------
White spotted cggtaaagggcgtacggtaggagagtcacccagtccccgccagtctccatggttaatttg
Cell: Read name and sequence
CRFK:b7c5b596-3c70-45bb-b00c-988c08291521 ------------------------------------------------------------
CRFK:4f28cb2e-0b77-4276-927b-22cf1cd859a9 ------------------------------------------------------------
CRFK:1a121a2d-cbd1-4954-953a-c59b730e8896 ------------------------------------------------------------
CRFK:5cc67035-40b4-4180-8075-baa2bb4be3e7 ------------------------------------------------------------
PG-4:1d375068-d36d-463b-a23b-b79a65e7211e ------------------------------------------------------------
PG-4:22777b42-f4c6-4e0d-994b-27b1798695bb cggtaaagggcgtacggtaggagagtcacccagtccccgccagtctccatggttaatttg
PG-4:befbbc54-737b-4de1-802e-a01ed3fea542 cggtaaggggcgtacggtaggagagtcacccagtccccgccagtctccatggttaatttg
PG-4:9baf3e20-d0e4-4767-94ac-af0d2ef545da ------------------------------------------------------------
PG-4:8bc2a176-7ea8-4825-a2f8-488be22f49bf cggtaaagggcgtacggtaggagagtcacccagtccccgc----tcccatggttaatttg
PG-4:7ed64960-07a4-4574-8739-89a5ecb31ad5 cggtaaagggcgtacggtaggagagtcacccagtccccgccagtctccatggttaatttg
WT ------------------------------------------------------------
White spotted gtaagggtctcttttagggttctattcattctttctacctgtcctgagctctggggccta
Cell: Read name and sequence
CRFK:b7c5b596-3c70-45bb-b00c-988c08291521 ------------------------------------------------------------
CRFK:4f28cb2e-0b77-4276-927b-22cf1cd859a9 ------------------------------------------------------------
CRFK:1a121a2d-cbd1-4954-953a-c59b730e8896 ------------------------------------------------------------
CRFK:5cc67035-40b4-4180-8075-baa2bb4be3e7 ------------------------------------------------------------
PG-4:1d375068-d36d-463b-a23b-b79a65e7211e ------------------------------------------------------------
PG-4:22777b42-f4c6-4e0d-994b-27b1798695bb gtaagggtctcttttagggttctattcattctttctacctgtcctgagctctggggccta
PG-4:befbbc54-737b-4de1-802e-a01ed3fea542 gtaagggtctcttttagggttctattcattctttctacctgtcctgagctctggggccta
PG-4:9baf3e20-d0e4-4767-94ac-af0d2ef545da ------------------------------------------------------------
PG-4:8bc2a176-7ea8-4825-a2f8-488be22f49bf gtaagggtctcttttagggttctattcattctttctacctgtcctgagctctggggccta
PG-4:7ed64960-07a4-4574-8739-89a5ecb31ad5 gtaagggtctcttttagggttctattcattctttctacctgtcctgagctctggggccta
WT ------------------------------------------------------------
White spotted taagcacaatgtaatttccagtttgcccccaccgccttggctactgcctgtgttacctgc
Cell: Read name and sequence
CRFK:b7c5b596-3c70-45bb-b00c-988c08291521 ------------------------------------------------------------
CRFK:4f28cb2e-0b77-4276-927b-22cf1cd859a9 ------------------------------------------------------------
CRFK:1a121a2d-cbd1-4954-953a-c59b730e8896 ------------------------------------------------------------
CRFK:5cc67035-40b4-4180-8075-baa2bb4be3e7 ------------------------------------------------------------
PG-4:1d375068-d36d-463b-a23b-b79a65e7211e ------------------------------------------------------------
PG-4:22777b42-f4c6-4e0d-994b-27b1798695bb taagcacaatgtaatttccagtttg--cccaccgccttggctactgcctgtgttacctgc
PG-4:befbbc54-737b-4de1-802e-a01ed3fea542 taagcacaatgtaatttccagtttgcccccaccgccttggctactgcctgtgttacctgc
PG-4:9baf3e20-d0e4-4767-94ac-af0d2ef545da ------------------------------------------------------------
PG-4:8bc2a176-7ea8-4825-a2f8-488be22f49bf taagcacaatgtaatttccagtttgcccccaccgccttggctactgcctgtgttacctgc
PG-4:7ed64960-07a4-4574-8739-89a5ecb31ad5 taagcacaatgtaatttccagtttgcccccaccgccttggctactgcctgtgttacctgc
WT ------------------------------------------------------------
White spotted gagataaaagctggtccattgtctgatcctaccagggcaggaaaaccatacctgggtaag
Cell: Read name and sequence
CRFK:b7c5b596-3c70-45bb-b00c-988c08291521 ------------------------------------------------------------
CRFK:4f28cb2e-0b77-4276-927b-22cf1cd859a9 ------------------------------------------------------------
CRFK:1a121a2d-cbd1-4954-953a-c59b730e8896 ------------------------------------------------------------
CRFK:5cc67035-40b4-4180-8075-baa2bb4be3e7 ------------------------------------------------------------
PG-4:1d375068-d36d-463b-a23b-b79a65e7211e ------------------------------------------------------------
PG-4:22777b42-f4c6-4e0d-994b-27b1798695bb gagataaaagctggtccattgtctgatcctaccagggcaggaaaaccatacctgggtaag
PG-4:befbbc54-737b-4de1-802e-a01ed3fea542 gagataaaagctggtccattgtctgatcctaccagggcaggaaaaccatacctgggtaag
PG-4:9baf3e20-d0e4-4767-94ac-af0d2ef545da ------------------------------------------------------------
PG-4:8bc2a176-7ea8-4825-a2f8-488be22f49bf gagataaaagctggtccattgtctgatcctaccagggcaggaaaaccatacctgggtaag
PG-4:7ed64960-07a4-4574-8739-89a5ecb31ad5 gagataaaagctggtccattgtctgatcctaccagggcaggaaaaccatacctgggtaag
WT ------------------------------------------------------------
White spotted atgtcttctagtagcttcttagccaccgtctgagccgtttcatgcttggttgggtatgcc
Cell: Read name and sequence
CRFK:b7c5b596-3c70-45bb-b00c-988c08291521 ------------------------------------------------------------
CRFK:4f28cb2e-0b77-4276-927b-22cf1cd859a9 ------------------------------------------------------------
CRFK:1a121a2d-cbd1-4954-953a-c59b730e8896 ------------------------------------------------------------
CRFK:5cc67035-40b4-4180-8075-baa2bb4be3e7 ------------------------------------------------------------
PG-4:1d375068-d36d-463b-a23b-b79a65e7211e ------------------------------------------------------------
PG-4:22777b42-f4c6-4e0d-994b-27b1798695bb atgtcttctagtagcttcttagccaccgtctgagccgtttcatgcttggttgggtatgcc
PG-4:befbbc54-737b-4de1-802e-a01ed3fea542 atgtcttctagtagcttcttagccaccgtctgagccgtttcatgcttggttgggtatgcc
PG-4:9baf3e20-d0e4-4767-94ac-af0d2ef545da ------------------------------------------------------------
PG-4:8bc2a176-7ea8-4825-a2f8-488be22f49bf atgtcttctagtagcttcttagccaccgtctgagccgtttcatgcttggttgggtatgcc
PG-4:7ed64960-07a4-4574-8739-89a5ecb31ad5 atgtcttctagtagcttcttagccaccgtctgagccgtttcatgcttggttgggtatgcc
WT ------------------------------------------------------------
White spotted tccacccagccagagaaggtgtctgtaaatactaaaagatatttaaaaccatactttcct
Cell: Read name and sequence
CRFK:b7c5b596-3c70-45bb-b00c-988c08291521 ------------------------------------------------------------
CRFK:4f28cb2e-0b77-4276-927b-22cf1cd859a9 ------------------------------------------------------------
CRFK:1a121a2d-cbd1-4954-953a-c59b730e8896 ------------------------------------------------------------
CRFK:5cc67035-40b4-4180-8075-baa2bb4be3e7 ------------------------------------------------------------
PG-4:1d375068-d36d-463b-a23b-b79a65e7211e ------------------------------------------------------------
PG-4:22777b42-f4c6-4e0d-994b-27b1798695bb tccacccagccagagaaggtgtctgtaaatactaaaagatatttaaaaccatactttcct
PG-4:befbbc54-737b-4de1-802e-a01ed3fea542 tccacccagccagagaaggtgtctgtaaatactaaaagatatttaaaaccatactttcct
PG-4:9baf3e20-d0e4-4767-94ac-af0d2ef545da ------------------------------------------------------------
PG-4:8bc2a176-7ea8-4825-a2f8-488be22f49bf tccacccagccagagaaggtgtc--aaagtactaaaagatatttaaaaccatactttcct
PG-4:7ed64960-07a4-4574-8739-89a5ecb31ad5 tccacccagccagagaaggtgtctgtaaatactaaaagatatttaaaaccatactttcct
WT ------------------------------------------------------------
White spotted ggtttgacttcagtgaagtcgacttcccattgggctcccggtctggtgcctctgagcctg
Cell: Read name and sequence
CRFK:b7c5b596-3c70-45bb-b00c-988c08291521 ------------------------------------------------------------
CRFK:4f28cb2e-0b77-4276-927b-22cf1cd859a9 ------------------------------------------------------------
CRFK:1a121a2d-cbd1-4954-953a-c59b730e8896 ------------------------------------------------------------
CRFK:5cc67035-40b4-4180-8075-baa2bb4be3e7 ------------------------------------------------------------
PG-4:1d375068-d36d-463b-a23b-b79a65e7211e ------------------------------------------------------------
PG-4:22777b42-f4c6-4e0d-994b-27b1798695bb ggtttgacttcagtgaagtcgacttcccattgggctcccggtctggtgcctctgagcctg
PG-4:befbbc54-737b-4de1-802e-a01ed3fea542 ggtttgacttcagtgaagtcgacttcccattgggctcccggtctggtgcctctgagcctg
PG-4:9baf3e20-d0e4-4767-94ac-af0d2ef545da ------------------------------------------------------------
PG-4:8bc2a176-7ea8-4825-a2f8-488be22f49bf ggtttgacttcagtgaagtcgacttcccattgggctcccggtctggtgcctctgagcctg
PG-4:7ed64960-07a4-4574-8739-89a5ecb31ad5 ggtttgacttcagtgaagtcgacttcccattgggctcccggtctggtgcctctgagcctg
WT ------------------------------------------------------------
White spotted gttcctttttcatttgatgtggccctcgcgttggtgagttggcaggtcttgcaggcagat
Cell: Read name and sequence
CRFK:b7c5b596-3c70-45bb-b00c-988c08291521 ------------------------------------------------------------
CRFK:4f28cb2e-0b77-4276-927b-22cf1cd859a9 ------------------------------------------------------------
CRFK:1a121a2d-cbd1-4954-953a-c59b730e8896 ------------------------------------------------------------
CRFK:5cc67035-40b4-4180-8075-baa2bb4be3e7 ------------------------------------------------------------
PG-4:1d375068-d36d-463b-a23b-b79a65e7211e ------------------------------------------------------------
PG-4:22777b42-f4c6-4e0d-994b-27b1798695bb gttcctttttcatttgatgtggccctcgcgttggtgagttggcaggtcttgcaggcagat
PG-4:befbbc54-737b-4de1-802e-a01ed3fea542 gttcctttttcatttgatgtggccctcgcgttggtgagttggcaggtcttgcaggcagat
PG-4:9baf3e20-d0e4-4767-94ac-af0d2ef545da ------------------------------------------------------------
PG-4:8bc2a176-7ea8-4825-a2f8-488be22f49bf gttcctttttcatttgatgtggccctcgcgttggtgagttggcaggtcttgcaggcagat
PG-4:7ed64960-07a4-4574-8739-89a5ecb31ad5 gttcctttttcatttgatgtggccctcgcgttggtgagttggcaggtcttgcaggcagat
WT ------------------------------------------------------------
White spotted acaacttgctctattttggtgtcctgttggtgaatcttaattccggcatgtcggattaag
Cell: Read name and sequence
CRFK:b7c5b596-3c70-45bb-b00c-988c08291521 ------------------------------------------------------------
CRFK:4f28cb2e-0b77-4276-927b-22cf1cd859a9 ------------------------------------------------------------
CRFK:1a121a2d-cbd1-4954-953a-c59b730e8896 ------------------------------------------------------------
CRFK:5cc67035-40b4-4180-8075-baa2bb4be3e7 ------------------------------------------------------------
PG-4:1d375068-d36d-463b-a23b-b79a65e7211e ------------------------------------------------------------
PG-4:22777b42-f4c6-4e0d-994b-27b1798695bb acaacttgctctattttggtgtcctgttggtgaatcttaattccggcatgtcggattaag
PG-4:befbbc54-737b-4de1-802e-a01ed3fea542 acaacttgctctattttggtgtcctgttggtgaatcttaattccggcatgtcggattaag
PG-4:9baf3e20-d0e4-4767-94ac-af0d2ef545da ------------------------------------------------------------
PG-4:8bc2a176-7ea8-4825-a2f8-488be22f49bf acaacttgctcta-tttggtgtcctgttggtgcatttt-ttaccggcatgtcggattaag
PG-4:7ed64960-07a4-4574-8739-89a5ecb31ad5 acaacttgctctattttggtgtcctgttggtgaatcttaattccggcatgtcggattaag
WT ------------------------------------------------------------
White spotted tcttttaattttcgggcccccatgtgagtagaccgatgcatgtgctctaatattgagact
Cell: Read name and sequence
CRFK:b7c5b596-3c70-45bb-b00c-988c08291521 ------------------------------------------------------------
CRFK:4f28cb2e-0b77-4276-927b-22cf1cd859a9 ------------------------------------------------------------
CRFK:1a121a2d-cbd1-4954-953a-c59b730e8896 ------------------------------------------------------------
CRFK:5cc67035-40b4-4180-8075-baa2bb4be3e7 ------------------------------------------------------------
PG-4:1d375068-d36d-463b-a23b-b79a65e7211e ------------------------------------------------------------
PG-4:22777b42-f4c6-4e0d-994b-27b1798695bb tcttttaattttcgggcccccatgtgagtagaccgatgcatgtgctctaatattgagact
PG-4:befbbc54-737b-4de1-802e-a01ed3fea542 tcttttaattttcgggcccccatgtgagtagaccgatgcatgtgctctaatattgagact
PG-4:9baf3e20-d0e4-4767-94ac-af0d2ef545da ------------------------------------------------------------
PG-4:8bc2a176-7ea8-4825-a2f8-488be22f49bf tcttttaattttcgggcccccatgtgagtagaccgatgcatgtgctctaatattgagact
PG-4:7ed64960-07a4-4574-8739-89a5ecb31ad5 tcttttaattttcgggcccccatgtgagtagaccgatgcatgtgctctaatattgagact
WT ------------------------------------------------------------
White spotted ccgagctggtctggcaacacgagctccttgttaggtgtataccaccatccctttatctcc
Cell: Read name and sequence
CRFK:b7c5b596-3c70-45bb-b00c-988c08291521 ------------------------------------------------------------
CRFK:4f28cb2e-0b77-4276-927b-22cf1cd859a9 ------------------------------------------------------------
CRFK:1a121a2d-cbd1-4954-953a-c59b730e8896 ------------------------------------------------------------
CRFK:5cc67035-40b4-4180-8075-baa2bb4be3e7 ------------------------------------------------------------
PG-4:1d375068-d36d-463b-a23b-b79a65e7211e ------------------------------------------------------------
PG-4:22777b42-f4c6-4e0d-994b-27b1798695bb ccgagctggtctggcaacacgagctccttgttaggtgtataccaccatccctttatctcc
PG-4:befbbc54-737b-4de1-802e-a01ed3fea542 ccgagctggtctggcaacacgagctccttgttaggtgtataccaccatccctttatctcc
PG-4:9baf3e20-d0e4-4767-94ac-af0d2ef545da ------------------------------------------------------------
PG-4:8bc2a176-7ea8-4825-a2f8-488be22f49bf ccgagctggtctggcaacacgagctccttgttaggtgtataccaccatccctttatctcc
PG-4:7ed64960-07a4-4574-8739-89a5ecb31ad5 ccgagctggtctggcaacacgagctccttgttaggtgtataccaccatccctttatctcc
WT ------------------------------------------------------------
White spotted tgggccatggggagtttcttgatccgctgtaattcctcctgggagtacttgggctggtct
Cell: Read name and sequence
CRFK:b7c5b596-3c70-45bb-b00c-988c08291521 ------------------------------------------------------------
CRFK:4f28cb2e-0b77-4276-927b-22cf1cd859a9 ------------------------------------------------------------
CRFK:1a121a2d-cbd1-4954-953a-c59b730e8896 ------------------------------------------------------------
CRFK:5cc67035-40b4-4180-8075-baa2bb4be3e7 ------------------------------------------------------------
PG-4:1d375068-d36d-463b-a23b-b79a65e7211e ------------------------------------------------------------
PG-4:22777b42-f4c6-4e0d-994b-27b1798695bb tgggccatggggagtttcttgatccgctgtaattcctcctgggagtacttgggctggtct
PG-4:befbbc54-737b-4de1-802e-a01ed3fea542 tgggccatggggagtttcttgatccgctgtaattcctcctgggagtacttgggctggtct
PG-4:9baf3e20-d0e4-4767-94ac-af0d2ef545da ------------------------------------------------------------
PG-4:8bc2a176-7ea8-4825-a2f8-488be22f49bf tgggccatggggagtttcttgatccgctgtaattctctcctgggagacttgggctggtct
PG-4:7ed64960-07a4-4574-8739-89a5ecb31ad5 tgggccatggggagtttcttgatccgctgtaattcctcctgggagtacttgggctggtct
WT ------------------------------------------------------------
White spotted ggtaaaactgggtctcctgggtctggtagt-tgtatggtcatggtggggactggagtaag
Cell: Read name and sequence
CRFK:b7c5b596-3c70-45bb-b00c-988c08291521 ------------------------------------------------------------
CRFK:4f28cb2e-0b77-4276-927b-22cf1cd859a9 ------------------------------------------------------------
CRFK:1a121a2d-cbd1-4954-953a-c59b730e8896 ------------------------------------------------------------
CRFK:5cc67035-40b4-4180-8075-baa2bb4be3e7 ------------------------------------------------------------
PG-4:1d375068-d36d-463b-a23b-b79a65e7211e ------------------------------------------------------------
PG-4:22777b42-f4c6-4e0d-994b-27b1798695bb ggtaaaactgggtctcctgggtctggtagt-tgtatggtcatggtggggactggagtaag
PG-4:befbbc54-737b-4de1-802e-a01ed3fea542 ggtaaaactgggtctcctgggtctggtagt-tgtatggtcatggtggggactggagtaag
PG-4:9baf3e20-d0e4-4767-94ac-af0d2ef545da ------------------------------------------------------------
PG-4:8bc2a176-7ea8-4825-a2f8-488be22f49bf ggtaaaactgggtctcctgggtctggtagtctatatgg--gttatggggactggagtaag
PG-4:7ed64960-07a4-4574-8739-89a5ecb31ad5 ggtaaaactgggtctcctgggtctggtagt-tgtatggtcatggtggggactggagtaag
WT ------------------------------------------------------------
White spotted ggctactgccttggctgcctggtcagcctttcgattacctctagctactgggttaccagc
Cell: Read name and sequence
CRFK:b7c5b596-3c70-45bb-b00c-988c08291521 ------------------------------------------------------------
CRFK:4f28cb2e-0b77-4276-927b-22cf1cd859a9 ------------------------------------------------------------
CRFK:1a121a2d-cbd1-4954-953a-c59b730e8896 ------------------------------------------------------------
CRFK:5cc67035-40b4-4180-8075-baa2bb4be3e7 ------------------------------------------------------------
PG-4:1d375068-d36d-463b-a23b-b79a65e7211e ------------------------------------------------------------
PG-4:22777b42-f4c6-4e0d-994b-27b1798695bb ggctactgccttggctgcctggtcagcctttcgattacctctagctactgggttatcagc
PG-4:befbbc54-737b-4de1-802e-a01ed3fea542 ggctactgccttggctgcctggtcagcctttcgattacctctagctactgggttatcagc
PG-4:9baf3e20-d0e4-4767-94ac-af0d2ef545da ------------------------------------------------------------
PG-4:8bc2a176-7ea8-4825-a2f8-488be22f49bf ggctactgccttggctgcctggtcagcctttcgattacctctagctactgggttatcagc
PG-4:7ed64960-07a4-4574-8739-89a5ecb31ad5 ggctactgccttggctgcctggtcagcctttcgattacctctagctactgggttatcagc
WT ------------------------------------------------------------
White spotted tttttggtgcc--cttggcagtggataatggctagcttggcaggaagccataaggccgta
Cell: Read name and sequence
CRFK:b7c5b596-3c70-45bb-b00c-988c08291521 ------------------------------------------------------------
CRFK:4f28cb2e-0b77-4276-927b-22cf1cd859a9 ------------------------------------------------------------
CRFK:1a121a2d-cbd1-4954-953a-c59b730e8896 ------------------------------------------------------------
CRFK:5cc67035-40b4-4180-8075-baa2bb4be3e7 ------------------------------------------------------------
PG-4:1d375068-d36d-463b-a23b-b79a65e7211e ------------------------------------------------------------
PG-4:22777b42-f4c6-4e0d-994b-27b1798695bb tttttggtgcc--cttggcagtggataatggctagcttggcaggaagccataaggccgta
PG-4:befbbc54-737b-4de1-802e-a01ed3fea542 tttttggtgcc--cttggcagtggataatggctagcttggcaggaagccataaggccgta
PG-4:9baf3e20-d0e4-4767-94ac-af0d2ef545da ------------------------------------------------------------
PG-4:8bc2a176-7ea8-4825-a2f8-488be22f49bf tttttggtgcc--cttggcagtggataatggctagcttggcaggaagccataaggccgta
PG-4:7ed64960-07a4-4574-8739-89a5ecb31ad5 tttttggtgccgtcttggcagtggataatggctagcttggcaggaagccataaggccgta
WT ------------------------------------------------------------
White spotted agcaggttaagtatctcctgcttattttttatagtccgtccttctgccgtcagtaacccc
Cell: Read name and sequence
CRFK:b7c5b596-3c70-45bb-b00c-988c08291521 ------------------------------------------------------------
CRFK:4f28cb2e-0b77-4276-927b-22cf1cd859a9 ------------------------------------------------------------
CRFK:1a121a2d-cbd1-4954-953a-c59b730e8896 ------------------------------------------------------------
CRFK:5cc67035-40b4-4180-8075-baa2bb4be3e7 ------------------------------------------------------------
PG-4:1d375068-d36d-463b-a23b-b79a65e7211e ------------------------------------------------------------
PG-4:22777b42-f4c6-4e0d-994b-27b1798695bb agcaggttaagtatctcctgcttattttttatagtccgtccttctgccgtcagtaacccc
PG-4:befbbc54-737b-4de1-802e-a01ed3fea542 agcaggttaagtatctcctgcttattttttatagtccgtccttctgccgtcagtaacccc
PG-4:9baf3e20-d0e4-4767-94ac-af0d2ef545da ------------------------------------------------------------
PG-4:8bc2a176-7ea8-4825-a2f8-488be22f49bf agcaggttaagtatctcctgcttattttttatagtccgtccttctgcctcagaggcaccc
PG-4:7ed64960-07a4-4574-8739-89a5ecb31ad5 agcaggttaagtatctcctgcttattttttatagtccgtccttctgccgtcagtaacccc
WT ------------------------------------------------------------
White spotted ctctcctgataaattgccccatgaatatgagctgtggcaaatgcataacggctgtctgtg
Cell: Read name and sequence
CRFK:b7c5b596-3c70-45bb-b00c-988c08291521 ------------------------------------------------------------
CRFK:4f28cb2e-0b77-4276-927b-22cf1cd859a9 ------------------------------------------------------------
CRFK:1a121a2d-cbd1-4954-953a-c59b730e8896 ------------------------------------------------------------
CRFK:5cc67035-40b4-4180-8075-baa2bb4be3e7 ------------------------------------------------------------
PG-4:1d375068-d36d-463b-a23b-b79a65e7211e ------------------------------------------------------------
PG-4:22777b42-f4c6-4e0d-994b-27b1798695bb ctctcctgataaattgccccatgaatatgagctgtggcaaatgcataacggctgtctgtg
PG-4:befbbc54-737b-4de1-802e-a01ed3fea542 ctctcctgataaattgccccatgaatatgagctgtggcaaatgcataacggctgtctgtg
PG-4:9baf3e20-d0e4-4767-94ac-af0d2ef545da ------------------------------------------------------------
PG-4:8bc2a176-7ea8-4825-a2f8-488be22f49bf cttctggaataaattgccccatgaatatgagctgtggcaaatgcataacggctgtctgtg
PG-4:7ed64960-07a4-4574-8739-89a5ecb31ad5 ctctcctgataaattgccccatgaatatgagctgtggcaaatgcataacggctgtctgtg
WT ------------------------------------------------------------
White spotted tagatgttgagccgttttccagctcccagcatcagcgccttggtgagggctatgagctct
Cell: Read name and sequence
CRFK:b7c5b596-3c70-45bb-b00c-988c08291521 ------------------------------------------------------------
CRFK:4f28cb2e-0b77-4276-927b-22cf1cd859a9 ------------------------------------------------------------
CRFK:1a121a2d-cbd1-4954-953a-c59b730e8896 ------------------------------------------------------------
CRFK:5cc67035-40b4-4180-8075-baa2bb4be3e7 ------------------------------------------------------------
PG-4:1d375068-d36d-463b-a23b-b79a65e7211e ------------------------------------------------------------
PG-4:22777b42-f4c6-4e0d-994b-27b1798695bb tagatgttgagccgttttccagctcccagcatcagcgccttggtgagggctatgagctct
PG-4:befbbc54-737b-4de1-802e-a01ed3fea542 tagatgttgagccgttttccagctcccagcatcagcgccttggtgagggctatgagctct
PG-4:9baf3e20-d0e4-4767-94ac-af0d2ef545da ------------------------------------------------------------
PG-4:8bc2a176-7ea8-4825-a2f8-488be22f49bf tagatgtt-agcggcttcccagctcccagcatcagcgccttggtgagggctatgagctct
PG-4:7ed64960-07a4-4574-8739-89a5ecb31ad5 tagatgttgagccgttttccagctcccagcatcagcgccttggtgagggctatgagctct
WT ------------------------------------------------------------
White spotted gctcgctgggctgacgttccggagggtagagcctccgcccatacggtgttggtttcggtg
Cell: Read name and sequence
CRFK:b7c5b596-3c70-45bb-b00c-988c08291521 ------------------------------------------------------------
CRFK:4f28cb2e-0b77-4276-927b-22cf1cd859a9 ------------------------------------------------------------
CRFK:1a121a2d-cbd1-4954-953a-c59b730e8896 ------------------------------------------------------------
CRFK:5cc67035-40b4-4180-8075-baa2bb4be3e7 ------------------------------------------------------------
PG-4:1d375068-d36d-463b-a23b-b79a65e7211e ------------------------------------------------------------
PG-4:22777b42-f4c6-4e0d-994b-27b1798695bb gctcgctgggctgacgttccggagggtagagcctccgcccatacggtgttggtttcggtg
PG-4:befbbc54-737b-4de1-802e-a01ed3fea542 gctcgctgggctgacgttccggagggtagagcctccgcccatacggtgttggtttcggtg
PG-4:9baf3e20-d0e4-4767-94ac-af0d2ef545da ------------------------------------------------------------
PG-4:8bc2a176-7ea8-4825-a2f8-488be22f49bf gctcgctgggctgacgttccgaagggtagagcctccgccc--acggtgttggtttcggtg
PG-4:7ed64960-07a4-4574-8739-89a5ecb31ad5 gctcgctgggctgacgttccggagggtagagcctccgcccatacggtgttggtttcggtg
WT ------------------------------------------------------------
White spotted accaccgctgcccccgcatacctgtgtccgcctcgcacaaagctgctgccatcagtgaac
Cell: Read name and sequence
CRFK:b7c5b596-3c70-45bb-b00c-988c08291521 ------------------------------------------------------------
CRFK:4f28cb2e-0b77-4276-927b-22cf1cd859a9 ------------------------------------------------------------
CRFK:1a121a2d-cbd1-4954-953a-c59b730e8896 ------------------------------------------------------------
CRFK:5cc67035-40b4-4180-8075-baa2bb4be3e7 ------------------------------------------------------------
PG-4:1d375068-d36d-463b-a23b-b79a65e7211e ------------------------------------------------------------
PG-4:22777b42-f4c6-4e0d-994b-27b1798695bb accaccgctgcccccgcatacctgtgtccgcctcgcacaaagctgctgccatcagtgaac
PG-4:befbbc54-737b-4de1-802e-a01ed3fea542 accaccgctgcccccgcatacctgtgtccgcctcgcacaaagctgctgccatcagtgaac
PG-4:9baf3e20-d0e4-4767-94ac-af0d2ef545da ------------------------------------------------------------
PG-4:8bc2a176-7ea8-4825-a2f8-488be22f49bf accaccgctgcccccgcatacctgtgtccgcctcgcacaaagctgctgccatcagtgaac
PG-4:7ed64960-07a4-4574-8739-89a5ecb31ad5 accaccgctgcccccgcatacctgtgtccgcctcgcacaaagctgctgccatcagtgaac
WT ------------------------------------------------------------
White spotted caagtagcctcagcatcgggga-ggggccggtcggtcaggtccgtccggaatccatgtac
Cell: Read name and sequence
CRFK:b7c5b596-3c70-45bb-b00c-988c08291521 ------------------------------------------------------------
CRFK:4f28cb2e-0b77-4276-927b-22cf1cd859a9 ------------------------------------------------------------
CRFK:1a121a2d-cbd1-4954-953a-c59b730e8896 ------------------------------------------------------------
CRFK:5cc67035-40b4-4180-8075-baa2bb4be3e7 ------------------------------------------------------------
PG-4:1d375068-d36d-463b-a23b-b79a65e7211e ------------------------------------------------------------
PG-4:22777b42-f4c6-4e0d-994b-27b1798695bb caagtagcctcagcatcgggga-ggggccggtcggtcaggtccgtccggaatccatgtac
PG-4:befbbc54-737b-4de1-802e-a01ed3fea542 caagtagcctcagcatcgggga-ggggccggtcggtcaggtccgtccggaatccatgtac
PG-4:9baf3e20-d0e4-4767-94ac-af0d2ef545da ------------------------------------------------------------
PG-4:8bc2a176-7ea8-4825-a2f8-488be22f49bf caagtagcctcagcatcggggagggggccggtcggtcaggtccgtccggaatccatgtac
PG-4:7ed64960-07a4-4574-8739-89a5ecb31ad5 caagtagcctcagcatcgggga-ggggccggtcggtcaggtccgtccggaatccatgtac
WT ------------------------------------------------------------
White spotted ttgttccaggatttccacacagtcatgtaatggagcacctaggtcagggtcgggcagcag
Cell: Read name and sequence
CRFK:b7c5b596-3c70-45bb-b00c-988c08291521 ------------------------------------------------------------
CRFK:4f28cb2e-0b77-4276-927b-22cf1cd859a9 ------------------------------------------------------------
CRFK:1a121a2d-cbd1-4954-953a-c59b730e8896 ------------------------------------------------------------
CRFK:5cc67035-40b4-4180-8075-baa2bb4be3e7 ------------------------------------------------------------
PG-4:1d375068-d36d-463b-a23b-b79a65e7211e ------------------------------------------------------------
PG-4:22777b42-f4c6-4e0d-994b-27b1798695bb ttgttccaggatttccacacagtcatgtaatggagcacctaggtcagggtcgggcagcag
PG-4:befbbc54-737b-4de1-802e-a01ed3fea542 ttgttccaggatttccacacagtcatgtaatggagcacctaggtcagggtcgggcagcag
PG-4:9baf3e20-d0e4-4767-94ac-af0d2ef545da ------------------------------------------------------------
PG-4:8bc2a176-7ea8-4825-a2f8-488be22f49bf ttgttccaggatttccacacagtcatgtaatggagcacctaggtcagggtcgggcagcag
PG-4:7ed64960-07a4-4574-8739-89a5ecb31ad5 ttgttccaggatttccacacagtcatgtaatggagcacctaggtcagggtcgggcagcag
WT ------------------------------------------------------------
White spotted ggttgcaggattgagggctacactggggtggaaccgcactcgtggagggttgagtaggag
Cell: Read name and sequence
CRFK:b7c5b596-3c70-45bb-b00c-988c08291521 ------------------------------------------------------------
CRFK:4f28cb2e-0b77-4276-927b-22cf1cd859a9 ------------------------------------------------------------
CRFK:1a121a2d-cbd1-4954-953a-c59b730e8896 ------------------------------------------------------------
CRFK:5cc67035-40b4-4180-8075-baa2bb4be3e7 ------------------------------------------------------------
PG-4:1d375068-d36d-463b-a23b-b79a65e7211e ------------------------------------------------------------
PG-4:22777b42-f4c6-4e0d-994b-27b1798695bb ggttgcaggattgagggctacactggggtggaaccgcactcgtggagggttgagtaggag
PG-4:befbbc54-737b-4de1-802e-a01ed3fea542 ggttgcaggattgagggctacactggggtggaaccgcactcgtggagggttgagtaggag
PG-4:9baf3e20-d0e4-4767-94ac-af0d2ef545da ------------------------------------------------------------
PG-4:8bc2a176-7ea8-4825-a2f8-488be22f49bf ggttgcaggattgagggctacactggggtggaaccgcactcgtggagggttgagtaggag
PG-4:7ed64960-07a4-4574-8739-89a5ecb31ad5 ggttgcaggattgagggctacactggggtggaaccgcactcgtggagggttgagtaggag
WT ------------------------------------------------------------
White spotted gctctggtaatgagtcatacgcgtattgctcatccatctatctggaggctgtttcaggac
Cell: Read name and sequence
CRFK:b7c5b596-3c70-45bb-b00c-988c08291521 ------------------------------------------------------------
CRFK:4f28cb2e-0b77-4276-927b-22cf1cd859a9 ------------------------------------------------------------
CRFK:1a121a2d-cbd1-4954-953a-c59b730e8896 ------------------------------------------------------------
CRFK:5cc67035-40b4-4180-8075-baa2bb4be3e7 ------------------------------------------------------------
PG-4:1d375068-d36d-463b-a23b-b79a65e7211e ------------------------------------------------------------
PG-4:22777b42-f4c6-4e0d-994b-27b1798695bb gctctggtaatgagtcatacgcgtattgctcatccatctatctggaggctgtttcaggac
PG-4:befbbc54-737b-4de1-802e-a01ed3fea542 gctctggtaatgagtcatacgcgtattgctcatccatctatctggaggctgtttcaggac
PG-4:9baf3e20-d0e4-4767-94ac-af0d2ef545da ------------------------------------------------------------
PG-4:8bc2a176-7ea8-4825-a2f8-488be22f49bf gctctggtacggatggatac-cgtattgctcatccatctatctggaggctgtttcaggac
PG-4:7ed64960-07a4-4574-8739-89a5ecb31ad5 gctctggtaatgagtcatacgcgtattgctcatccatctatctggaggctgtttcaggac
WT ------------------------------------------------------------
White spotted cccttcaatggcgtgtggggtcgtgatccagatctcctgtcctagggtcagtttgtctgc
Cell: Read name and sequence
CRFK:b7c5b596-3c70-45bb-b00c-988c08291521 ------------------------------------------------------------
CRFK:4f28cb2e-0b77-4276-927b-22cf1cd859a9 ------------------------------------------------------------
CRFK:1a121a2d-cbd1-4954-953a-c59b730e8896 ------------------------------------------------------------
CRFK:5cc67035-40b4-4180-8075-baa2bb4be3e7 ------------------------------------------------------------
PG-4:1d375068-d36d-463b-a23b-b79a65e7211e ------------------------------------------------------------
PG-4:22777b42-f4c6-4e0d-994b-27b1798695bb cccttcaatggcgtgtggggtcgtgatccagatctcctgtcctagggtcagtttgtctgc
PG-4:befbbc54-737b-4de1-802e-a01ed3fea542 cccttcaatggcgtgtggggtcgtgatccagatctcctgtcctagggtcagtttgtctgc
PG-4:9baf3e20-d0e4-4767-94ac-af0d2ef545da ------------------------------------------------------------
PG-4:8bc2a176-7ea8-4825-a2f8-488be22f49bf cccttcaatggcgtgt-gggtcgtgatccagatctcctgtcctagggtcagtttgtctgc
PG-4:7ed64960-07a4-4574-8739-89a5ecb31ad5 cccttcaatggcgtgtggggtcgtgatccagatctcctgtcctagggtcagtttgtctgc
WT ------------------------------------------------------------
White spotted atccttgactaggagtgctgtcgctgcaataattcttaggcatggcggccagccggcagc
Cell: Read name and sequence
CRFK:b7c5b596-3c70-45bb-b00c-988c08291521 ------------------------------------------------------------
CRFK:4f28cb2e-0b77-4276-927b-22cf1cd859a9 ------------------------------------------------------------
CRFK:1a121a2d-cbd1-4954-953a-c59b730e8896 ------------------------------------------------------------
CRFK:5cc67035-40b4-4180-8075-baa2bb4be3e7 ------------------------------------------------------------
PG-4:1d375068-d36d-463b-a23b-b79a65e7211e ------------------------------------------------------------
PG-4:22777b42-f4c6-4e0d-994b-27b1798695bb atccttgactaggagtgctgtcgctgcaataattcttaggcatggcggccagccggcagc
PG-4:befbbc54-737b-4de1-802e-a01ed3fea542 atccttgactaggagtgctgtcgctgcaataattcttaggcatggcggccagccggcagc
PG-4:9baf3e20-d0e4-4767-94ac-af0d2ef545da ------------------------------------------------------------
PG-4:8bc2a176-7ea8-4825-a2f8-488be22f49bf atccttgactaggagtgctgtcgctgcag-aattcttaggcatggcggccagccggcagc
PG-4:7ed64960-07a4-4574-8739-89a5ecb31ad5 atccttgactaggagtgctgtcgctgcaataattcttaggcatggcggccagccggcagc
WT ------------------------------------------------------------
White spotted cactgggtctagtttcttagacaggtaagccactggacggttccaggggcctaaggcttg
Cell: Read name and sequence
CRFK:b7c5b596-3c70-45bb-b00c-988c08291521 ------------------------------------------------------------
CRFK:4f28cb2e-0b77-4276-927b-22cf1cd859a9 ------------------------------------------------------------
CRFK:1a121a2d-cbd1-4954-953a-c59b730e8896 ------------------------------------------------------------
CRFK:5cc67035-40b4-4180-8075-baa2bb4be3e7 ------------------------------------------------------------
PG-4:1d375068-d36d-463b-a23b-b79a65e7211e ------------------------------------------------------------
PG-4:22777b42-f4c6-4e0d-994b-27b1798695bb cactgggtctagtttcttagacaggtaagccactggacggttccaggggcctaaggcttg
PG-4:befbbc54-737b-4de1-802e-a01ed3fea542 cactgggtctagtttcttagacaggtaagccactggacggttccaggggcctaaggcttg
PG-4:9baf3e20-d0e4-4767-94ac-af0d2ef545da ------------------------------------------------------------
PG-4:8bc2a176-7ea8-4825-a2f8-488be22f49bf cactgggtctagtttcttagacaggtaagccactggacggttccaagggcccaaggcttg
PG-4:7ed64960-07a4-4574-8739-89a5ecb31ad5 cactgggtctagtttcttagacaggtaagccactggacggttccaggggcctaaggcttg
WT ------------------------------------------------------------
White spotted agttagaactccttttgctattcccttatgct-cgtctacaaagaggtggaagggcttcg
Cell: Read name and sequence
CRFK:b7c5b596-3c70-45bb-b00c-988c08291521 ------------------------------------------------------------
CRFK:4f28cb2e-0b77-4276-927b-22cf1cd859a9 ------------------------------------------------------------
CRFK:1a121a2d-cbd1-4954-953a-c59b730e8896 ------------------------------------------------------------
CRFK:5cc67035-40b4-4180-8075-baa2bb4be3e7 ------------------------------------------------------------
PG-4:1d375068-d36d-463b-a23b-b79a65e7211e ------------------------------------------------------------
PG-4:22777b42-f4c6-4e0d-994b-27b1798695bb agttagaactccttttgctattcccttatgct-cgtctacaaagaggtggaagggcttcg
PG-4:befbbc54-737b-4de1-802e-a01ed3fea542 agttagaactccttttgctattcccttatgct-cgtctacaaagaggtggaagggctttg
PG-4:9baf3e20-d0e4-4767-94ac-af0d2ef545da ------------------------------------------------------------
PG-4:8bc2a176-7ea8-4825-a2f8-488be22f49bf agttagaactccttttgctattcccttagactgcgcccacaaagaggtggga-ggcttcg
PG-4:7ed64960-07a4-4574-8739-89a5ecb31ad5 agttagaactccttttgctattcccttatgct-cgtctacaaagaggtggaagggcttcg
WT ------------------------------------------------------------
White spotted taatgtccggtaggcccagggctggggcacttaggagggccctttttaactgattaaagg
Cell: Read name and sequence
CRFK:b7c5b596-3c70-45bb-b00c-988c08291521 ------------------------------------------------------------
CRFK:4f28cb2e-0b77-4276-927b-22cf1cd859a9 ------------------------------------------------------------
CRFK:1a121a2d-cbd1-4954-953a-c59b730e8896 ------------------------------------------------------------
CRFK:5cc67035-40b4-4180-8075-baa2bb4be3e7 ------------------------------------------------------------
PG-4:1d375068-d36d-463b-a23b-b79a65e7211e ------------------------------------------------------------
PG-4:22777b42-f4c6-4e0d-994b-27b1798695bb taatgtccggtaggcccagggctggggcacttaggagggccctttttaactgattaaagg
PG-4:befbbc54-737b-4de1-802e-a01ed3fea542 taatgtccggtaggcccagggctggggcacttaggagggccctttttaactgattaaagg
PG-4:9baf3e20-d0e4-4767-94ac-af0d2ef545da ------------------------------------------------------------
PG-4:8bc2a176-7ea8-4825-a2f8-488be22f49bf taatgtccggtaggcccagggctggggcacttaggagggccctttttaactgattaaagg
PG-4:7ed64960-07a4-4574-8739-89a5ecb31ad5 taatgtccggtaggcccagggctggggcacttaggagggccctttttaactgattaaagg
WT ------------------------------------------------------------
White spotted cagtttcttctttttccagcccattttaaatgttttcccctcttttggtagcttcatata
Cell: Read name and sequence
CRFK:b7c5b596-3c70-45bb-b00c-988c08291521 ------------------------------------------------------------
CRFK:4f28cb2e-0b77-4276-927b-22cf1cd859a9 ------------------------------------------------------------
CRFK:1a121a2d-cbd1-4954-953a-c59b730e8896 ------------------------------------------------------------
CRFK:5cc67035-40b4-4180-8075-baa2bb4be3e7 ------------------------------------------------------------
PG-4:1d375068-d36d-463b-a23b-b79a65e7211e ------------------------------------------------------------
PG-4:22777b42-f4c6-4e0d-994b-27b1798695bb cagtttcttcttttt-cagccca-tttaaatgttttcccctcttt-ggtagcttcatata
PG-4:befbbc54-737b-4de1-802e-a01ed3fea542 cagtttcttcttttt-cagccca-tttaaatgttttcccctcttt-ggtagcttcatata
PG-4:9baf3e20-d0e4-4767-94ac-af0d2ef545da ------------------------------------------------------------
PG-4:8bc2a176-7ea8-4825-a2f8-488be22f49bf cagtttcttcttttt-cagccca-tttaaatgttttcccctcttt-ggtagcttcatata
PG-4:7ed64960-07a4-4574-8739-89a5ecb31ad5 cagtttcttcttttt-cagccca-tttaaatgttttcccctcttt-ggtagcttcatata
WT ------------------------------------------------------------
White spotted gggggcctggcg---atctcagcaaaaacctggaaccccagaggcgggcagtagccggct
Cell: Read name and sequence
CRFK:b7c5b596-3c70-45bb-b00c-988c08291521 ------------------------------------------------------------
CRFK:4f28cb2e-0b77-4276-927b-22cf1cd859a9 ------------------------------------------------------------
CRFK:1a121a2d-cbd1-4954-953a-c59b730e8896 ------------------------------------------------------------
CRFK:5cc67035-40b4-4180-8075-baa2bb4be3e7 ------------------------------------------------------------
PG-4:1d375068-d36d-463b-a23b-b79a65e7211e ------------------------------------------------------------
PG-4:22777b42-f4c6-4e0d-994b-27b1798695bb -ggggcctggcg---atctcagcaaaa-cctggaa-cccagaggc-ggcagtagccggct
PG-4:befbbc54-737b-4de1-802e-a01ed3fea542 -ggggcctggcg---atctcagcaaaa-cctggaa-cccagaggc-ggcagtagccggct
PG-4:9baf3e20-d0e4-4767-94ac-af0d2ef545da ------------------------------------------------------------
PG-4:8bc2a176-7ea8-4825-a2f8-488be22f49bf -ggggcctggcg---atctcagcaaaa-cctggaa-cccagaggc-ggcagtagccggct
PG-4:7ed64960-07a4-4574-8739-89a5ecb31ad5 -ggggcctggcgaaaatctcagcaaaa-cctggaa-cccagaggcgggcag-acccggct
WT ------------------------------------------------------------
White spotted gatcctaggaattcccctcacttccccttcgggaggtgggagtagggatcttta-ggaca
Cell: Read name and sequence
CRFK:b7c5b596-3c70-45bb-b00c-988c08291521 ------------------------------------------------------------
CRFK:4f28cb2e-0b77-4276-927b-22cf1cd859a9 ------------------------------------------------------------
CRFK:1a121a2d-cbd1-4954-953a-c59b730e8896 ------------------------------------------------------------
CRFK:5cc67035-40b4-4180-8075-baa2bb4be3e7 ------------------------------------------------------------
PG-4:1d375068-d36d-463b-a23b-b79a65e7211e ------------------------------------------------------------
PG-4:22777b42-f4c6-4e0d-994b-27b1798695bb gatcctaggaatt-ccctcactt-ctcttcgggaggtgggagtagggatcttta-ggaca
PG-4:befbbc54-737b-4de1-802e-a01ed3fea542 gatcctaggaatt-ccctcactt-ctcttcgggaggtggag--agggatcttta-ggaca
PG-4:9baf3e20-d0e4-4767-94ac-af0d2ef545da ------------------------------------------------------------
PG-4:8bc2a176-7ea8-4825-a2f8-488be22f49bf gatcctagcaaattccctcactt-ctcttcgggaggtgggagtagggatcttta-ggaca
PG-4:7ed64960-07a4-4574-8739-89a5ecb31ad5 gatcctaggaatc-cccacttct-ctctttggagggtgggaataggtatctttataaata
WT ------------------------------------------------------------
White spotted gtttct-tttctggcttctgataacc------gccgctgtccgccctccaggatatatcc
Cell: Read name and sequence
CRFK:b7c5b596-3c70-45bb-b00c-988c08291521 ------------------------------------------------------------
CRFK:4f28cb2e-0b77-4276-927b-22cf1cd859a9 ------------------------------------------------------------
CRFK:1a121a2d-cbd1-4954-953a-c59b730e8896 ------------------------------------------------------------
CRFK:5cc67035-40b4-4180-8075-baa2bb4be3e7 ------------------------------------------------------------
PG-4:1d375068-d36d-463b-a23b-b79a65e7211e ------------------------------------------------------------
PG-4:22777b42-f4c6-4e0d-994b-27b1798695bb gtttct-tttctggcttctgataacc------gccgctgtccgccctccaggatatatcc
PG-4:befbbc54-737b-4de1-802e-a01ed3fea542 gtttct-tttctggcttctgataacc------gccgctgtccgccctccaggatatatcc
PG-4:9baf3e20-d0e4-4767-94ac-af0d2ef545da ------------------------------------------------------------
PG-4:8bc2a176-7ea8-4825-a2f8-488be22f49bf gtttct-tttctggcttctgataacc------gccgctgtccgccctccaggatatatcc
PG-4:7ed64960-07a4-4574-8739-89a5ecb31ad5 gttcctctttctggcctcccatatcccttctgcctgtcctccgccctccaggatatatcc
WT ------------------------------------------------------------
White spotted caggtaacttaccctctccctgcatatctgagccttcttcgcagatacgcggtatcctaa
Cell: Read name and sequence
CRFK:b7c5b596-3c70-45bb-b00c-988c08291521 ------------------------------------------------------------
CRFK:4f28cb2e-0b77-4276-927b-22cf1cd859a9 ------------------------------------------------------------
CRFK:1a121a2d-cbd1-4954-953a-c59b730e8896 ------------------------------------------------------------
CRFK:5cc67035-40b4-4180-8075-baa2bb4be3e7 ------------------------------------------------------------
PG-4:1d375068-d36d-463b-a23b-b79a65e7211e ------------------------------------------------------------
PG-4:22777b42-f4c6-4e0d-994b-27b1798695bb caggtaacttaccctctccctgcatatctgagccttcttcgcagatacgcggtatcctaa
PG-4:befbbc54-737b-4de1-802e-a01ed3fea542 caggtaacttaccctctccctgcatatctgagccttcttcgcagatacgcggtatcctaa
PG-4:9baf3e20-d0e4-4767-94ac-af0d2ef545da ------------------------------------------------------------
PG-4:8bc2a176-7ea8-4825-a2f8-488be22f49bf caggtaacttaccctctccctgcatatctgagccttcttcgcagatacgcggtatcctaa
PG-4:7ed64960-07a4-4574-8739-89a5ecb31ad5 caggtagagtg-cctcctcctgcatatctgagccttcttcgcagatacgcggtatcctaa
WT ------------------------------------------------------------
White spotted ggtccccagggtagccagcaggtcctgggtccctcgctcacagtcttt-ggcagtgtcgg
Cell: Read name and sequence
CRFK:b7c5b596-3c70-45bb-b00c-988c08291521 ------------------------------------------------------------
CRFK:4f28cb2e-0b77-4276-927b-22cf1cd859a9 ------------------------------------------------------------
CRFK:1a121a2d-cbd1-4954-953a-c59b730e8896 ------------------------------------------------------------
CRFK:5cc67035-40b4-4180-8075-baa2bb4be3e7 ------------------------------------------------------------
PG-4:1d375068-d36d-463b-a23b-b79a65e7211e ------------------------------------------------------------
PG-4:22777b42-f4c6-4e0d-994b-27b1798695bb ggtccccagggtagccagcaggtcctgggtccctcgctcacagtcttt-ggcagtgtcgg
PG-4:befbbc54-737b-4de1-802e-a01ed3fea542 ggtccccagggtagccagcaggtcctgggtccctcgctcacagtcttt-ggcagtgtcgg
PG-4:9baf3e20-d0e4-4767-94ac-af0d2ef545da ------------------------------------------------------------
PG-4:8bc2a176-7ea8-4825-a2f8-488be22f49bf ggtccccagggtagccagcaggtcctggggtcctcgctcacagtctttgggcagtgtcgg
PG-4:7ed64960-07a4-4574-8739-89a5ecb31ad5 ggtccccagggtagccagcaggtcctgggtccctcgctcacagtcttt-ggcagtgtcgg
WT ------------------------------------------------------------
White spotted cagcaatcaggatgtcatctacatactgtagaagggtgaggccagggtgctcccttctgt
Cell: Read name and sequence
CRFK:b7c5b596-3c70-45bb-b00c-988c08291521 ------------------------------------------------------------
CRFK:4f28cb2e-0b77-4276-927b-22cf1cd859a9 ------------------------------------------------------------
CRFK:1a121a2d-cbd1-4954-953a-c59b730e8896 ------------------------------------------------------------
CRFK:5cc67035-40b4-4180-8075-baa2bb4be3e7 ------------------------------------------------------------
PG-4:1d375068-d36d-463b-a23b-b79a65e7211e ------------------------------------------------------------
PG-4:22777b42-f4c6-4e0d-994b-27b1798695bb cagcaatcaggatgtcatctacatactgtagaagggtgaggccagggtgctcccttctgt
PG-4:befbbc54-737b-4de1-802e-a01ed3fea542 cagcaatcaggatgtcatctacatactgtagaagggtgaggccagggtgctcccttctgt
PG-4:9baf3e20-d0e4-4767-94ac-af0d2ef545da ------------------------------------------------------------
PG-4:8bc2a176-7ea8-4825-a2f8-488be22f49bf cagcaatcaggatgtcatctacatactgtagaagggtgaggccagggtgctcccttctgt
PG-4:7ed64960-07a4-4574-8739-89a5ecb31ad5 cagcaatcaggatgtcatctacatactgtagaagggtgaggccagggtgctcccttctgt
WT ------------------------------------------------------------
White spotted actcacccaggtcctcgtgtagcgcctcgtcaaagatggtgggtgaatttttgaatccct
Cell: Read name and sequence
CRFK:b7c5b596-3c70-45bb-b00c-988c08291521 ------------------------------------------------------------
CRFK:4f28cb2e-0b77-4276-927b-22cf1cd859a9 ------------------------------------------------------------
CRFK:1a121a2d-cbd1-4954-953a-c59b730e8896 ------------------------------------------------------------
CRFK:5cc67035-40b4-4180-8075-baa2bb4be3e7 ------------------------------------------------------------
PG-4:1d375068-d36d-463b-a23b-b79a65e7211e ------------------------------------------------------------
PG-4:22777b42-f4c6-4e0d-994b-27b1798695bb actcacccaggtcctcgtgtagcgcctcgtcaaagatggtgggtgaatttttgaatccct
PG-4:befbbc54-737b-4de1-802e-a01ed3fea542 actcacccaggtcctcgtgtagcgcctcgtcaaagatggtgggtgaatttttgaatccct
PG-4:9baf3e20-d0e4-4767-94ac-af0d2ef545da ------------------------------------------------------------
PG-4:8bc2a176-7ea8-4825-a2f8-488be22f49bf actcacccaggtcctcgtgtagcgcctcgtcaaagatggtgggtgaatttttgaatccct
PG-4:7ed64960-07a4-4574-8739-89a5ecb31ad5 actcacccaggtcctcgtgtagcgcctcgtcaaagatggtgggtgaatttttgaatccct
WT ------------------------------------------------------------
White spotted gaggtagccgtgtccaggtgagttgtccactgtagccctcctccggatcatgccactcga
Cell: Read name and sequence
CRFK:b7c5b596-3c70-45bb-b00c-988c08291521 ------------------------------------------------------------
CRFK:4f28cb2e-0b77-4276-927b-22cf1cd859a9 ------------------------------------------------------------
CRFK:1a121a2d-cbd1-4954-953a-c59b730e8896 ------------------------------------------------------------
CRFK:5cc67035-40b4-4180-8075-baa2bb4be3e7 ------------------------------------------------------------
PG-4:1d375068-d36d-463b-a23b-b79a65e7211e ------------------------------------------------------------
PG-4:22777b42-f4c6-4e0d-994b-27b1798695bb gaggtagccgtgtccaggtgagttgtccactgtagccctcctccggatcatgccactcga
PG-4:befbbc54-737b-4de1-802e-a01ed3fea542 gaggtagccgtgtccaggtgagttgtccactgtagccctcctccggatcatgccactcga
PG-4:9baf3e20-d0e4-4767-94ac-af0d2ef545da ------------------------------------------------------------
PG-4:8bc2a176-7ea8-4825-a2f8-488be22f49bf gaggtagccgtgtccaggtgagttgtccactgtagccctcctccggatcatgccactcga
PG-4:7ed64960-07a4-4574-8739-89a5ecb31ad5 gaggtagccgtgtccaggtgagttgtccactgtagccctcctccggatcatgccactcga
WT ------------------------------------------------------------
White spotted aggcgaacaagggttggctctggggtgccagcggcagactgaagaaggcgtcctttaaat
Cell: Read name and sequence
CRFK:b7c5b596-3c70-45bb-b00c-988c08291521 ------------------------------------------------------------
CRFK:4f28cb2e-0b77-4276-927b-22cf1cd859a9 ------------------------------------------------------------
CRFK:1a121a2d-cbd1-4954-953a-c59b730e8896 ------------------------------------------------------------
CRFK:5cc67035-40b4-4180-8075-baa2bb4be3e7 ------------------------------------------------------------
PG-4:1d375068-d36d-463b-a23b-b79a65e7211e ------------------------------------------------------------
PG-4:22777b42-f4c6-4e0d-994b-27b1798695bb aggcgaacaagggttggctctggggtgccagcggcagactgaagaaggcgtcctttaaat
PG-4:befbbc54-737b-4de1-802e-a01ed3fea542 aggcgaacaagggttggctctggggtgccagcggcagactgaagaaggcgtcctttaaat
PG-4:9baf3e20-d0e4-4767-94ac-af0d2ef545da ------------------------------------------------------------
PG-4:8bc2a176-7ea8-4825-a2f8-488be22f49bf aggcgaacaagggttggctctggggtgccagcggcagatggaagaaggcgtcctttaaat
PG-4:7ed64960-07a4-4574-8739-89a5ecb31ad5 aggcgaacaagggttggctctggggtgccagcggcagactgaagaaggcgtcctttaaat
WT ------------------------------------------------------------
White spotted ctagtacagtataccagaccctggagggcgccaaggagctcaagagagtatacgggttgg
Cell: Read name and sequence
CRFK:b7c5b596-3c70-45bb-b00c-988c08291521 ------------------------------------------------------------
CRFK:4f28cb2e-0b77-4276-927b-22cf1cd859a9 ------------------------------------------------------------
CRFK:1a121a2d-cbd1-4954-953a-c59b730e8896 ------------------------------------------------------------
CRFK:5cc67035-40b4-4180-8075-baa2bb4be3e7 ------------------------------------------------------------
PG-4:1d375068-d36d-463b-a23b-b79a65e7211e ------------------------------------------------------------
PG-4:22777b42-f4c6-4e0d-994b-27b1798695bb ctagtacagtataccagaccctggagggcgccaaggagctcaagagagtatacgggttgg
PG-4:befbbc54-737b-4de1-802e-a01ed3fea542 ctagtacagtataccagaccctggagggcgccaaggagctcaagagagtatacgggttgg
PG-4:9baf3e20-d0e4-4767-94ac-af0d2ef545da ------------------------------------------------------------
PG-4:8bc2a176-7ea8-4825-a2f8-488be22f49bf ctagtacagtataccagaccctggagggcgcc-aggagctcaagagagtatacgggttgg
PG-4:7ed64960-07a4-4574-8739-89a5ecb31ad5 ctagtacagtataccagaccctggagggcgccaaggagctcaagagagtatacgggttgg
WT ------------------------------------------------------------
White spotted gaacagttgggtgtatgtccatgaccctcttatttacttcc--cggaggtcttgtaccgg
Cell: Read name and sequence
CRFK:b7c5b596-3c70-45bb-b00c-988c08291521 ------------------------------------------------------------
CRFK:4f28cb2e-0b77-4276-927b-22cf1cd859a9 ------------------------------------------------------------
CRFK:1a121a2d-cbd1-4954-953a-c59b730e8896 ------------------------------------------------------------
CRFK:5cc67035-40b4-4180-8075-baa2bb4be3e7 ------------------------------------------------------------
PG-4:1d375068-d36d-463b-a23b-b79a65e7211e ------------------------------------------------------------
PG-4:22777b42-f4c6-4e0d-994b-27b1798695bb gaacagttgggtgtatgtccatgaccctcttatttacttcc--cggaggtcttgtaccgg
PG-4:befbbc54-737b-4de1-802e-a01ed3fea542 gaacagttgggtgtatgtccatgaccctcttatttacttcc--cggaggtcttgtaccgg
PG-4:9baf3e20-d0e4-4767-94ac-af0d2ef545da ------------------------------------------------------------
PG-4:8bc2a176-7ea8-4825-a2f8-488be22f49bf gaacagttgggtgtatgtccatgaccctcttatttacttcccgcggaggtcttgtaccgg
PG-4:7ed64960-07a4-4574-8739-89a5ecb31ad5 gaacagttgggtgtatgtccatgaccctcttatttacttcc--cggaggtcttgtaccgg
WT ------------------------------------------------------------
White spotted tcggtagtcatttgtgtgaggctttttgaccggcagtaggggggtgttccaggcagactg
Cell: Read name and sequence
CRFK:b7c5b596-3c70-45bb-b00c-988c08291521 ------------------------------------------------------------
CRFK:4f28cb2e-0b77-4276-927b-22cf1cd859a9 ------------------------------------------------------------
CRFK:1a121a2d-cbd1-4954-953a-c59b730e8896 ------------------------------------------------------------
CRFK:5cc67035-40b4-4180-8075-baa2bb4be3e7 ------------------------------------------------------------
PG-4:1d375068-d36d-463b-a23b-b79a65e7211e ------------------------------------------------------------
PG-4:22777b42-f4c6-4e0d-994b-27b1798695bb tcggtagtcatttgtgtgaggctttttgaccggcagtaggggggtgttccaggcagactg
PG-4:befbbc54-737b-4de1-802e-a01ed3fea542 tcggtagtcatttgtgtgaggctttttgaccggcagtaggggggtgttccaggcagactg
PG-4:9baf3e20-d0e4-4767-94ac-af0d2ef545da ------------------------------------------------------------
PG-4:8bc2a176-7ea8-4825-a2f8-488be22f49bf tcggtagtcatttgtgtgaggctttttgaccggcagtaggggggtgttccaggcagactg
PG-4:7ed64960-07a4-4574-8739-89a5ecb31ad5 tcggtagtcatttgtgtgaggctttttgaccggcagtaggggggtgttccaggcagactg
WT ------------------------------------------------------------
White spotted gcaaggaactagtacccctaggcttcgtagtctccggatgtgtggctggatccccttcca
Cell: Read name and sequence
CRFK:b7c5b596-3c70-45bb-b00c-988c08291521 ------------------------------------------------------------
CRFK:4f28cb2e-0b77-4276-927b-22cf1cd859a9 ------------------------------------------------------------
CRFK:1a121a2d-cbd1-4954-953a-c59b730e8896 ------------------------------------------------------------
CRFK:5cc67035-40b4-4180-8075-baa2bb4be3e7 ------------------------------------------------------------
PG-4:1d375068-d36d-463b-a23b-b79a65e7211e ------------------------------------------------------------
PG-4:22777b42-f4c6-4e0d-994b-27b1798695bb gcaaggaactagtacccctaggcttcgtagtctccggatgtgtggctggatccccttcca
PG-4:befbbc54-737b-4de1-802e-a01ed3fea542 gcaaggaactagtacccctaggcttcgtagtctccggatgtgtggctggatccccttcca
PG-4:9baf3e20-d0e4-4767-94ac-af0d2ef545da ------------------------------------------------------------
PG-4:8bc2a176-7ea8-4825-a2f8-488be22f49bf gcaaggaactagtacccc-aggcttcgtagtctccggatgtgtggctggatccccttcca
PG-4:7ed64960-07a4-4574-8739-89a5ecb31ad5 gcaaggaactagtacccctaggcttcgtagtctccggatgtgtggctggatccccttcca
WT ------------------------------------------------------------
White spotted ggcctcctgagacatggggtattgtttgatccttaccggactctctcctggcttgagctc
Cell: Read name and sequence
CRFK:b7c5b596-3c70-45bb-b00c-988c08291521 ------------------------------------------------------------
CRFK:4f28cb2e-0b77-4276-927b-22cf1cd859a9 ------------------------------------------------------------
CRFK:1a121a2d-cbd1-4954-953a-c59b730e8896 ------------------------------------------------------------
CRFK:5cc67035-40b4-4180-8075-baa2bb4be3e7 ------------------------------------------------------------
PG-4:1d375068-d36d-463b-a23b-b79a65e7211e ------------------------------------------------------------
PG-4:22777b42-f4c6-4e0d-994b-27b1798695bb ggcctcctgagacatggggtattgtttgatccttaccggactctctcctggcttgagctc
PG-4:befbbc54-737b-4de1-802e-a01ed3fea542 ggcctcctgagacatggggtattgtttgatccttaccggactctctcctggcttgagctc
PG-4:9baf3e20-d0e4-4767-94ac-af0d2ef545da ------------------------------------------------------------
PG-4:8bc2a176-7ea8-4825-a2f8-488be22f49bf ggcctcctgagacatggggtattgtttgatccttaccggactctctcctggcttgagctc
PG-4:7ed64960-07a4-4574-8739-89a5ecb31ad5 ggcctcctgagacatggggtattgtttgatccttaccggactctctcctggcttgagctc
WT ------------------------------------------------------------
White spotted taccaggactggggtcctatgagcggctagtcccatcccccctgtctctgcccaaaccga
Cell: Read name and sequence
CRFK:b7c5b596-3c70-45bb-b00c-988c08291521 ------------------------------------------------------------
CRFK:4f28cb2e-0b77-4276-927b-22cf1cd859a9 ------------------------------------------------------------
CRFK:1a121a2d-cbd1-4954-953a-c59b730e8896 ------------------------------------------------------------
CRFK:5cc67035-40b4-4180-8075-baa2bb4be3e7 ------------------------------------------------------------
PG-4:1d375068-d36d-463b-a23b-b79a65e7211e ------------------------------------------------------------
PG-4:22777b42-f4c6-4e0d-994b-27b1798695bb taccaggactggggtcctatgagcggctagtcccatcccccctgtctctgcccaaaccga
PG-4:befbbc54-737b-4de1-802e-a01ed3fea542 taccaggactggggtcctatgagcggctagtcccatcccccctgtctctgcccaaaccga
PG-4:9baf3e20-d0e4-4767-94ac-af0d2ef545da ------------------------------------------------------------
PG-4:8bc2a176-7ea8-4825-a2f8-488be22f49bf taccaggactggggtcctatgagcggctagtcccatcccccctgtctctgcccaaaccga
PG-4:7ed64960-07a4-4574-8739-89a5ecb31ad5 taccaggactggggtcctatgagcggctagtcccat-ccccctgtctctgcccaaaccga
WT ------------------------------------------------------------
White spotted ggggaattcttgtaacca--tctgtctatattatcctctctcgggagcgcctcctggtgg
Cell: Read name and sequence
CRFK:b7c5b596-3c70-45bb-b00c-988c08291521 ------------------------------------------------------------
CRFK:4f28cb2e-0b77-4276-927b-22cf1cd859a9 ------------------------------------------------------------
CRFK:1a121a2d-cbd1-4954-953a-c59b730e8896 ------------------------------------------------------------
CRFK:5cc67035-40b4-4180-8075-baa2bb4be3e7 ------------------------------------------------------------
PG-4:1d375068-d36d-463b-a23b-b79a65e7211e ------------------------------------------------------------
PG-4:22777b42-f4c6-4e0d-994b-27b1798695bb ggggaattcttgtaacca--tctgtctatattatcctctctcgggagcgcctcctggtgg
PG-4:befbbc54-737b-4de1-802e-a01ed3fea542 ggggaattcttgtaacca--tctgtctatattatcctctctcgggagcgcctcctggtgg
PG-4:9baf3e20-d0e4-4767-94ac-af0d2ef545da ------------------------------------------------------------
PG-4:8bc2a176-7ea8-4825-a2f8-488be22f49bf ggggaattcttgtaaccatctctgtccacatgatcctctct--gcagtgcctcctggtgg
PG-4:7ed64960-07a4-4574-8739-89a5ecb31ad5 ggggaattcttgtaacca--tctgtctatattatcctctctcgggagcgcctcctggtgg
WT ------------------------------------------------------------
White spotted aggaggtattcatcctccagtttcatggtcaggacctggatggggtggcccttgccatcg
Cell: Read name and sequence
CRFK:b7c5b596-3c70-45bb-b00c-988c08291521 ------------------------------------------------------------
CRFK:4f28cb2e-0b77-4276-927b-22cf1cd859a9 ------------------------------------------------------------
CRFK:1a121a2d-cbd1-4954-953a-c59b730e8896 ------------------------------------------------------------
CRFK:5cc67035-40b4-4180-8075-baa2bb4be3e7 ------------------------------------------------------------
PG-4:1d375068-d36d-463b-a23b-b79a65e7211e ------------------------------------------------------------
PG-4:22777b42-f4c6-4e0d-994b-27b1798695bb aggaggtattcatcctccagtttcatggtcaggacctggatggggtggcccttgccatcg
PG-4:befbbc54-737b-4de1-802e-a01ed3fea542 aggaggtattcatcctccagtttcatggtcaggacctggatggggtggcccttgccatcg
PG-4:9baf3e20-d0e4-4767-94ac-af0d2ef545da ------------------------------------------------------------
PG-4:8bc2a176-7ea8-4825-a2f8-488be22f49bf aggaggtattcatcctccagtttcatggtcaggacctggatggggtggcccttgccatcg
PG-4:7ed64960-07a4-4574-8739-89a5ecb31ad5 aggaggtattcatcctccagtttcatggtcaggacctggatggggtggcccttgccatcg
WT ------------------------------------------------------------
White spotted gtgacctgaggccccccttgtctgaaagttatctgagctccaatcttggtcagtaagtcc
Cell: Read name and sequence
CRFK:b7c5b596-3c70-45bb-b00c-988c08291521 ------------------------------------------------------------
CRFK:4f28cb2e-0b77-4276-927b-22cf1cd859a9 ------------------------------------------------------------
CRFK:1a121a2d-cbd1-4954-953a-c59b730e8896 ------------------------------------------------------------
CRFK:5cc67035-40b4-4180-8075-baa2bb4be3e7 ------------------------------------------------------------
PG-4:1d375068-d36d-463b-a23b-b79a65e7211e ------------------------------------------------------------
PG-4:22777b42-f4c6-4e0d-994b-27b1798695bb gtgacctgaggccccccttgtctgaaagttatctgagctccaatcttggtcagtaagtcc
PG-4:befbbc54-737b-4de1-802e-a01ed3fea542 gtgacctgaggccccccttgtctgaaagttatctgagctccaatcttggtcagtaagtcc
PG-4:9baf3e20-d0e4-4767-94ac-af0d2ef545da ------------------------------------------------------------
PG-4:8bc2a176-7ea8-4825-a2f8-488be22f49bf gttacttgaggccccccttgtctgaaagttatctgagctccaatcttggtcagtaagtcc
PG-4:7ed64960-07a4-4574-8739-89a5ecb31ad5 gtgacctgaggccccccttgtctgaaagttatctgagctccaatcttggtcagtaagtcc
WT ------------------------------------------------------------
White spotted cgtcctaacagcgggtaggggcattctggtattaccataaaggagtgggatacccggccc
Cell: Read name and sequence
CRFK:b7c5b596-3c70-45bb-b00c-988c08291521 ------------------------------------------------------------
CRFK:4f28cb2e-0b77-4276-927b-22cf1cd859a9 ------------------------------------------------------------
CRFK:1a121a2d-cbd1-4954-953a-c59b730e8896 ------------------------------------------------------------
CRFK:5cc67035-40b4-4180-8075-baa2bb4be3e7 ------------------------------------------------------------
PG-4:1d375068-d36d-463b-a23b-b79a65e7211e ------------------------------------------------------------
PG-4:22777b42-f4c6-4e0d-994b-27b1798695bb cgtcctaacagcgggtaggggcattctggtattaccataaaggagtgggatacccggccc
PG-4:befbbc54-737b-4de1-802e-a01ed3fea542 cgtcctaacagcgggtaggggcattctggtattaccataaaggagtgggatacccggccc
PG-4:9baf3e20-d0e4-4767-94ac-af0d2ef545da ------------------------------------------------------------
PG-4:8bc2a176-7ea8-4825-a2f8-488be22f49bf cg--ctgacagtg---aggggcattctggtattaccataaaggagtgggatacccggccc
PG-4:7ed64960-07a4-4574-8739-89a5ecb31ad5 cgtcctaacagcgggtaggggcattctggtattaccataaaggagtgggatacccggccc
WT ------------------------------------------------------------
White spotted gttcccaaatctactgttcttcgggtagtccatgaatactggctcataccagttgcccc-
Cell: Read name and sequence
CRFK:b7c5b596-3c70-45bb-b00c-988c08291521 ------------------------------------------------------------
CRFK:4f28cb2e-0b77-4276-927b-22cf1cd859a9 ------------------------------------------------------------
CRFK:1a121a2d-cbd1-4954-953a-c59b730e8896 ------------------------------------------------------------
CRFK:5cc67035-40b4-4180-8075-baa2bb4be3e7 ------------------------------------------------------------
PG-4:1d375068-d36d-463b-a23b-b79a65e7211e ------------------------------------------------------------
PG-4:22777b42-f4c6-4e0d-994b-27b1798695bb gttcccaaatctactgttcttcgggtagtccatgaatactggctcataccagttgcccc-
PG-4:befbbc54-737b-4de1-802e-a01ed3fea542 gttcccaaatctactgttcttcgggtagtccatgaatactggctcataccagttgcccc-
PG-4:9baf3e20-d0e4-4767-94ac-af0d2ef545da ------------------------------------------------------------
PG-4:8bc2a176-7ea8-4825-a2f8-488be22f49bf gttcccaaatctactgttcttcgggtagtccatga--gatggctcataccagttgcccct
PG-4:7ed64960-07a4-4574-8739-89a5ecb31ad5 gttcccaaatctactgttcttcgggtagtccatgaatactggctcataccagttgcccc-
WT ------------------------------------------------------------
White spotted ttgtacccaggacttcttgctagctagttttccttgtggggtgcggaggaccgaatgttg
Cell: Read name and sequence
CRFK:b7c5b596-3c70-45bb-b00c-988c08291521 ------------------------------------------------------------
CRFK:4f28cb2e-0b77-4276-927b-22cf1cd859a9 ------------------------------------------------------------
CRFK:1a121a2d-cbd1-4954-953a-c59b730e8896 ------------------------------------------------------------
CRFK:5cc67035-40b4-4180-8075-baa2bb4be3e7 ------------------------------------------------------------
PG-4:1d375068-d36d-463b-a23b-b79a65e7211e ------------------------------------------------------------
PG-4:22777b42-f4c6-4e0d-994b-27b1798695bb ttgtacccaggacttcttgctagctagttttccttgtggggtgcggaggaccgaatgttg
PG-4:befbbc54-737b-4de1-802e-a01ed3fea542 ttgtacccaggacttcttgctagctagttttccttgtggggtgcggaggaccgaatgttg
PG-4:9baf3e20-d0e4-4767-94ac-af0d2ef545da ------------------------------------------------------------
PG-4:8bc2a176-7ea8-4825-a2f8-488be22f49bf ttctacccaggactctctgtgagccagttttccttgtggggtgcggaggaccgaatgttg
PG-4:7ed64960-07a4-4574-8739-89a5ecb31ad5 ttgtacccaggacttcttgctagctagttttccttgtggggtgcgta--ttctaatgttg
WT ------------------------------------------------------------
White spotted tgctccggtgtcgacaaggaagtcaataggggtcccctccactttaagagttaccctggg
Cell: Read name and sequence
CRFK:b7c5b596-3c70-45bb-b00c-988c08291521 ------------------------------------------------------------
CRFK:4f28cb2e-0b77-4276-927b-22cf1cd859a9 ------------------------------------------------------------
CRFK:1a121a2d-cbd1-4954-953a-c59b730e8896 ------------------------------------------------------------
CRFK:5cc67035-40b4-4180-8075-baa2bb4be3e7 ------------------------------------------------------------
PG-4:1d375068-d36d-463b-a23b-b79a65e7211e ------------------------------------------------------------
PG-4:22777b42-f4c6-4e0d-994b-27b1798695bb tgctccggtgtcgacaaggaagtcaataggggtcccctccactttaagagttaccctggg
PG-4:befbbc54-737b-4de1-802e-a01ed3fea542 tgctccggtgtcgacaaggaagtcaataggggtcccctccactttaagagttaccctggg
PG-4:9baf3e20-d0e4-4767-94ac-af0d2ef545da ------------------------------------------------------------
PG-4:8bc2a176-7ea8-4825-a2f8-488be22f49bf tgctccggtgtcgacaaggaagtcaataggggtcccctccactttaagagttaccctggg
PG-4:7ed64960-07a4-4574-8739-89a5ecb31ad5 tgctccggtgtcgacaaggaagtcaataggggtcccctccactttaagagttaccctggg
WT ------------------------------------------------------------
White spotted ttcggggagagggtccgaaccctgactcccctaatcacttagttcatccagctctaggac
Cell: Read name and sequence
CRFK:b7c5b596-3c70-45bb-b00c-988c08291521 ------------------------------------------------------------
CRFK:4f28cb2e-0b77-4276-927b-22cf1cd859a9 ------------------------------------------------------------
CRFK:1a121a2d-cbd1-4954-953a-c59b730e8896 ------------------------------------------------------------
CRFK:5cc67035-40b4-4180-8075-baa2bb4be3e7 ------------------------------------------------------------
PG-4:1d375068-d36d-463b-a23b-b79a65e7211e ------------------------------------------------------------
PG-4:22777b42-f4c6-4e0d-994b-27b1798695bb ttcggggagagggtccgaaccctgactcccctaatcacttagttca------gctaggac
PG-4:befbbc54-737b-4de1-802e-a01ed3fea542 ttcggggagagggtccgaaccctgactcccctaatcacttagttcatccagctctaggac
PG-4:9baf3e20-d0e4-4767-94ac-af0d2ef545da ------------------------------------------------------------
PG-4:8bc2a176-7ea8-4825-a2f8-488be22f49bf ttcggggaca-ggtctgaaccctgactcccctaatcacttagttcatccagctc-aggac
PG-4:7ed64960-07a4-4574-8739-89a5ecb31ad5 ttcggggagagggtccgaaccctgactcccctaatcacttagttcatccagctctaggac
WT ------------------------------------------------------------
White spotted ttttactcgatcagtcttgctttccttcccgccggcccttttcggacaatctcgggccca
Cell: Read name and sequence
CRFK:b7c5b596-3c70-45bb-b00c-988c08291521 ------------------------------------------------------------
CRFK:4f28cb2e-0b77-4276-927b-22cf1cd859a9 ------------------------------------------------------------
CRFK:1a121a2d-cbd1-4954-953a-c59b730e8896 ------------------------------------------------------------
CRFK:5cc67035-40b4-4180-8075-baa2bb4be3e7 ------------------------------------------------------------
PG-4:1d375068-d36d-463b-a23b-b79a65e7211e ------------------------------------------------------------
PG-4:22777b42-f4c6-4e0d-994b-27b1798695bb ttttactcgatcagtcttgcttcccttcccgccggcccttttcggacaatctcgggccca
PG-4:befbbc54-737b-4de1-802e-a01ed3fea542 ttttactcgatcagtcttgcttcccttcccgccggcccttttcggacaatctcgggccca
PG-4:9baf3e20-d0e4-4767-94ac-af0d2ef545da ------------------------------------------------------------
PG-4:8bc2a176-7ea8-4825-a2f8-488be22f49bf ttttactcgatcagtcttgcttcccttcccgccggcccttttgaga-atcctcgggccca
PG-4:7ed64960-07a4-4574-8739-89a5ecb31ad5 ttttactcgatcagtcttgcttcccttcccgccggcccttttcggacaatctcgggccca
WT ------------------------------------------------------------
White spotted atgccctatctccttgcaatatgcgcactgatccttctgcagcctctgcttccccccctt
Cell: Read name and sequence
CRFK:b7c5b596-3c70-45bb-b00c-988c08291521 ------------------------------------------------------------
CRFK:4f28cb2e-0b77-4276-927b-22cf1cd859a9 ------------------------------------------------------------
CRFK:1a121a2d-cbd1-4954-953a-c59b730e8896 ------------------------------------------------------------
CRFK:5cc67035-40b4-4180-8075-baa2bb4be3e7 ------------------------------------------------------------
PG-4:1d375068-d36d-463b-a23b-b79a65e7211e ------------------------------------------------------------
PG-4:22777b42-f4c6-4e0d-994b-27b1798695bb atgccctatctccttgcaatatgcgcactgatccttctgcagcctctgcttccccccctt
PG-4:befbbc54-737b-4de1-802e-a01ed3fea542 atgccctatctccttgcaatatgcgcactgatccttctgcagcctctgcttccccccctt
PG-4:9baf3e20-d0e4-4767-94ac-af0d2ef545da ------------------------------------------------------------
PG-4:8bc2a176-7ea8-4825-a2f8-488be22f49bf atgccctatctccttgcaatatgccgactgatccttctgcagcctctgcttccccccctt
PG-4:7ed64960-07a4-4574-8739-89a5ecb31ad5 atgccctatctccttgcaatatgcgcactgatccttctgcagcctctgcttccccccctt
WT ------------------------------------------------------------
White spotted ggtggtgcttttaccttttcttgcatcgtctgccagctgccggagacggcggtctcg-tt
Cell: Read name and sequence
CRFK:b7c5b596-3c70-45bb-b00c-988c08291521 ------------------------------------------------------------
CRFK:4f28cb2e-0b77-4276-927b-22cf1cd859a9 ------------------------------------------------------------
CRFK:1a121a2d-cbd1-4954-953a-c59b730e8896 ------------------------------------------------------------
CRFK:5cc67035-40b4-4180-8075-baa2bb4be3e7 ------------------------------------------------------------
PG-4:1d375068-d36d-463b-a23b-b79a65e7211e ------------------------------------------------------------
PG-4:22777b42-f4c6-4e0d-994b-27b1798695bb ggtggtgcttttaccttttcttgcatcgtctgccagctgccggagacggcggtctcg-tt
PG-4:befbbc54-737b-4de1-802e-a01ed3fea542 ggtggtgcttttaccttttcttgcatcgtctgccagctgccggagacggcggtctcg-tt
PG-4:9baf3e20-d0e4-4767-94ac-af0d2ef545da ------------------------------------------------------------
PG-4:8bc2a176-7ea8-4825-a2f8-488be22f49bf ggtggtgcttttaccttttcttgcatcgtctgccagctgccggagacggcggtctcg-tt
PG-4:7ed64960-07a4-4574-8739-89a5ecb31ad5 ggtggtgcttttaccttttcttgcatcgtctgccagctgccggagacggcggttctgctc
WT ------------------------------------------------------------
White spotted cctcggggaagtcagcagtggtagctagcagtattctggccaggtctcgagtctgcttac
Cell: Read name and sequence
CRFK:b7c5b596-3c70-45bb-b00c-988c08291521 ------------------------------------------------------------
CRFK:4f28cb2e-0b77-4276-927b-22cf1cd859a9 ------------------------------------------------------------
CRFK:1a121a2d-cbd1-4954-953a-c59b730e8896 ------------------------------------------------------------
CRFK:5cc67035-40b4-4180-8075-baa2bb4be3e7 ------------------------------------------------------------
PG-4:1d375068-d36d-463b-a23b-b79a65e7211e ------------------------------------------------------------
PG-4:22777b42-f4c6-4e0d-994b-27b1798695bb cctcggggaagtcagcagtggtagctagcagtattctggccaggtctcgagtctgcttac
PG-4:befbbc54-737b-4de1-802e-a01ed3fea542 cctcggggaagtcagcagtggtagctagcagtattctggccaggtctcgagtctgcttac
PG-4:9baf3e20-d0e4-4767-94ac-af0d2ef545da ------------------------------------------------------------
PG-4:8bc2a176-7ea8-4825-a2f8-488be22f49bf cctcggggaagtcagcagtggtagctagcagtattctggccaggtctcgagtctgcttac
PG-4:7ed64960-07a4-4574-8739-89a5ecb31ad5 ccttggggaagtcagcagtggtagctagcagtattctggccaggtctcgagtctgcttac
WT ------------------------------------------------------------
White spotted tgctggcagccgccatggcgcgagcctgcttgtcctcaggaggctcccggttattatata
Cell: Read name and sequence
CRFK:b7c5b596-3c70-45bb-b00c-988c08291521 ------------------------------------------------------------
CRFK:4f28cb2e-0b77-4276-927b-22cf1cd859a9 ------------------------------------------------------------
CRFK:1a121a2d-cbd1-4954-953a-c59b730e8896 ------------------------------------------------------------
CRFK:5cc67035-40b4-4180-8075-baa2bb4be3e7 ------------------------------------------------------------
PG-4:1d375068-d36d-463b-a23b-b79a65e7211e ------------------------------------------------------------
PG-4:22777b42-f4c6-4e0d-994b-27b1798695bb tgctggcagccgccatggcgcgagcctgcttgtcctcaggaggctcccggttattatata
PG-4:befbbc54-737b-4de1-802e-a01ed3fea542 tgctggcagccgccatggcgcgagcctgcttgtcctcaggaggctcccggttattatata
PG-4:9baf3e20-d0e4-4767-94ac-af0d2ef545da ------------------------------------------------------------
PG-4:8bc2a176-7ea8-4825-a2f8-488be22f49bf tgctggcagccgccatggcgcgagcctgcttgtcctcaggaggctcccggttattatata
PG-4:7ed64960-07a4-4574-8739-89a5ecb31ad5 tgctggcagccgccatggcgcgagcctgcttgtcctcaggaggctcccggttattatata
WT ------------------------------------------------------------
White spotted ccttttcggctaccaccagtaagtcctgcagacttttttctcctagtctatctattttct
Cell: Read name and sequence
CRFK:b7c5b596-3c70-45bb-b00c-988c08291521 ------------------------------------------------------------
CRFK:4f28cb2e-0b77-4276-927b-22cf1cd859a9 ------------------------------------------------------------
CRFK:1a121a2d-cbd1-4954-953a-c59b730e8896 ------------------------------------------------------------
CRFK:5cc67035-40b4-4180-8075-baa2bb4be3e7 ------------------------------------------------------------
PG-4:1d375068-d36d-463b-a23b-b79a65e7211e ------------------------------------------------------------
PG-4:22777b42-f4c6-4e0d-994b-27b1798695bb ccttttcggctaccaccagtaagtcctgcagacttttttctcctagtctatctattttct
PG-4:befbbc54-737b-4de1-802e-a01ed3fea542 ccttttcggctaccaccagtaagtcctgcagacttttttctcctagtctatctattttct
PG-4:9baf3e20-d0e4-4767-94ac-af0d2ef545da ------------------------------------------------------------
PG-4:8bc2a176-7ea8-4825-a2f8-488be22f49bf ccttttcggctaccaccagtaagtcctgcagacttttttctcctagtctatctattttct
PG-4:7ed64960-07a4-4574-8739-89a5ecb31ad5 ccttttcggctaccaccagtaagtcctgcagacttttttctcctagtctatctattttct
WT ------------------------------------------------------------
White spotted gtaattttctcctaatgtctacggccgattggtttacaaaggccatgataacagctgcct
Cell: Read name and sequence
CRFK:b7c5b596-3c70-45bb-b00c-988c08291521 ------------------------------------------------------------
CRFK:4f28cb2e-0b77-4276-927b-22cf1cd859a9 ------------------------------------------------------------
CRFK:1a121a2d-cbd1-4954-953a-c59b730e8896 ------------------------------------------------------------
CRFK:5cc67035-40b4-4180-8075-baa2bb4be3e7 ------------------------------------------------------------
PG-4:1d375068-d36d-463b-a23b-b79a65e7211e ------------------------------------------------------------
PG-4:22777b42-f4c6-4e0d-994b-27b1798695bb gtaattttctcctaatgtctacggccgattggtttacaaaggccatgataacagctgcct
PG-4:befbbc54-737b-4de1-802e-a01ed3fea542 gtaattttctcctaatgtctacggccgattggtttacaaaggccatgataacagctgcct
PG-4:9baf3e20-d0e4-4767-94ac-af0d2ef545da ------------------------------------------------------------
PG-4:8bc2a176-7ea8-4825-a2f8-488be22f49bf gtaattttctcctaatgtctacggccgattggtttacaaaggccatgataacagctgcct
PG-4:7ed64960-07a4-4574-8739-89a5ecb31ad5 gtaattttctcctaatgtctacggccgattggtttacaaaggccatgataacagctgcct
WT ------------------------------------------------------------
White spotted tgctttccggagcctctggatccatgggggtgtaggtacggaatgcctccatgatccgtt
Cell: Read name and sequence
CRFK:b7c5b596-3c70-45bb-b00c-988c08291521 ------------------------------------------------------------
CRFK:4f28cb2e-0b77-4276-927b-22cf1cd859a9 ------------------------------------------------------------
CRFK:1a121a2d-cbd1-4954-953a-c59b730e8896 ------------------------------------------------------------
CRFK:5cc67035-40b4-4180-8075-baa2bb4be3e7 ------------------------------------------------------------
PG-4:1d375068-d36d-463b-a23b-b79a65e7211e ------------------------------------------------------------
PG-4:22777b42-f4c6-4e0d-994b-27b1798695bb tgctttccggagcctctggatccatgggggtgtaggtacggaatgcctccatgatccgtt
PG-4:befbbc54-737b-4de1-802e-a01ed3fea542 tgctttccggagcctctggatccatgggggtgtaggtacggaatgcctccatgatccgtt
PG-4:9baf3e20-d0e4-4767-94ac-af0d2ef545da ------------------------------------------------------------
PG-4:8bc2a176-7ea8-4825-a2f8-488be22f49bf tgctttccggagcctctggatccatgggggtgtaggtacggaatgcctccatgatccgtt
PG-4:7ed64960-07a4-4574-8739-89a5ecb31ad5 tgctttccgtagtctctggatccatgggggtgtaggtacggaatgcctccatgatccgtt
WT ------------------------------------------------------------
White spotted ctaaaaaggcagctggagattcatcttttccctgttgtacatttcctaccttggccaaat
Cell: Read name and sequence
CRFK:b7c5b596-3c70-45bb-b00c-988c08291521 ------------------------------------------------------------
CRFK:4f28cb2e-0b77-4276-927b-22cf1cd859a9 ------------------------------------------------------------
CRFK:1a121a2d-cbd1-4954-953a-c59b730e8896 ------------------------------------------------------------
CRFK:5cc67035-40b4-4180-8075-baa2bb4be3e7 ------------------------------------------------------------
PG-4:1d375068-d36d-463b-a23b-b79a65e7211e ------------------------------------------------------------
PG-4:22777b42-f4c6-4e0d-994b-27b1798695bb ctaaaaaggcagctggagattcatcttttccctgttgtacatttcctaccttggccaaat
PG-4:befbbc54-737b-4de1-802e-a01ed3fea542 ctaaaaaggcagctggagattcatcttttccctgttgtacatttcctaccttggccaaat
PG-4:9baf3e20-d0e4-4767-94ac-af0d2ef545da ------------------------------------------------------------
PG-4:8bc2a176-7ea8-4825-a2f8-488be22f49bf ctaaaaaggcagctggagattcatcttttccctgttgtacatttcctaccttggccaaat
PG-4:7ed64960-07a4-4574-8739-89a5ecb31ad5 ctaaaaaggcagctggagattcatcttttccctgttgtacatttcctaccttggccaaat
WT ------------------------------------------------------------
White spotted tggttggctttctagcagccattcggagaccccccattagagtctggcggtagacccgga
Cell: Read name and sequence
CRFK:b7c5b596-3c70-45bb-b00c-988c08291521 ------------------------------------------------------------
CRFK:4f28cb2e-0b77-4276-927b-22cf1cd859a9 ------------------------------------------------------------
CRFK:1a121a2d-cbd1-4954-953a-c59b730e8896 ------------------------------------------------------------
CRFK:5cc67035-40b4-4180-8075-baa2bb4be3e7 ------------------------------------------------------------
PG-4:1d375068-d36d-463b-a23b-b79a65e7211e ------------------------------------------------------------
PG-4:22777b42-f4c6-4e0d-994b-27b1798695bb tggttggctttctagcagccattcggagaccccccattagagtctggcggtagacccgga
PG-4:befbbc54-737b-4de1-802e-a01ed3fea542 tggttggctttctagcagccattcggagaccccccattagagtctggcggtagacccgga
PG-4:9baf3e20-d0e4-4767-94ac-af0d2ef545da ------------------------------------------------------------
PG-4:8bc2a176-7ea8-4825-a2f8-488be22f49bf tggttggctttctagcagccattcggagaccccccattagagtctggcggtagacccgga
PG-4:7ed64960-07a4-4574-8739-89a5ecb31ad5 tggttggctttctagcagccattcggagaccccccattagagtctggcggtagacccgga
WT ------------------------------------------------------------
White spotted gcctctccttaccttctgccgtgttgaaatcccactggggccgagttaaggggaaggagg
Cell: Read name and sequence
CRFK:b7c5b596-3c70-45bb-b00c-988c08291521 ------------------------------------------------------------
CRFK:4f28cb2e-0b77-4276-927b-22cf1cd859a9 ------------------------------------------------------------
CRFK:1a121a2d-cbd1-4954-953a-c59b730e8896 ------------------------------------------------------------
CRFK:5cc67035-40b4-4180-8075-baa2bb4be3e7 ------------------------------------------------------------
PG-4:1d375068-d36d-463b-a23b-b79a65e7211e ------------------------------------------------------------
PG-4:22777b42-f4c6-4e0d-994b-27b1798695bb gcctctccttaccttctgccgtgttgaaatcccactggggccgagttaaggggaaggagg
PG-4:befbbc54-737b-4de1-802e-a01ed3fea542 gcctctccttaccttctgccgtgttgaaatcccactggggccgagttaaggggaaggagg
PG-4:9baf3e20-d0e4-4767-94ac-af0d2ef545da ------------------------------------------------------------
PG-4:8bc2a176-7ea8-4825-a2f8-488be22f49bf gcctctccttaccttctgccgtgttgaaatcccactggggccgagtta--gggaaggagg
PG-4:7ed64960-07a4-4574-8739-89a5ecb31ad5 gcctctccttaccttctgccgtgttgaaatcccactggggccgagttaaggggaaggagg
WT ------------------------------------------------------------
White spotted catctatctgagcttggttggtggtgggattcccgtctgcgcccggaactagttttcggg
Cell: Read name and sequence
CRFK:b7c5b596-3c70-45bb-b00c-988c08291521 ------------------------------------------------------------
CRFK:4f28cb2e-0b77-4276-927b-22cf1cd859a9 ------------------------------------------------------------
CRFK:1a121a2d-cbd1-4954-953a-c59b730e8896 ------------------------------------------------------------
CRFK:5cc67035-40b4-4180-8075-baa2bb4be3e7 ------------------------------------------------------------
PG-4:1d375068-d36d-463b-a23b-b79a65e7211e ------------------------------------------------------------
PG-4:22777b42-f4c6-4e0d-994b-27b1798695bb catctatctgagcttggttggtggtgggattcccgtctgcgcccggaactagttttcggg
PG-4:befbbc54-737b-4de1-802e-a01ed3fea542 catctatctgagcttggttggtggtgggattcccgtctgcgcccggaactagttttcggg
PG-4:9baf3e20-d0e4-4767-94ac-af0d2ef545da ------------------------------------------------------------
PG-4:8bc2a176-7ea8-4825-a2f8-488be22f49bf catctatctgagcttggttggtggtgggattcccgtctgcgcccggaactagttttcggg
PG-4:7ed64960-07a4-4574-8739-89a5ecb31ad5 catctatctgagcttggttggtggtgggattcccgtctgcgcccggaactagttttcggg
WT ------------------------------------------------------------
White spotted cctcattgaggattctttctctttcttcagtcgtgaacaggacctgcaaaagctgctggc
Cell: Read name and sequence
CRFK:b7c5b596-3c70-45bb-b00c-988c08291521 ------------------------------------------------------------
CRFK:4f28cb2e-0b77-4276-927b-22cf1cd859a9 ------------------------------------------------------------
CRFK:1a121a2d-cbd1-4954-953a-c59b730e8896 ------------------------------------------------------------
CRFK:5cc67035-40b4-4180-8075-baa2bb4be3e7 ------------------------------------------------------------
PG-4:1d375068-d36d-463b-a23b-b79a65e7211e ------------------------------------------------------------
PG-4:22777b42-f4c6-4e0d-994b-27b1798695bb cctcattgaggattctttctctttcttcagtcgtgaacaggacctgcaaaagctgctggc
PG-4:befbbc54-737b-4de1-802e-a01ed3fea542 cctcattgaggattctttctctttcttcagtcgtgaacaggacctgcaaaagctgctggc
PG-4:9baf3e20-d0e4-4767-94ac-af0d2ef545da ------------------------------------------------------------
PG-4:8bc2a176-7ea8-4825-a2f8-488be22f49bf cctcattgaggattctttctctttcttcagtcgtgaacaggacctg--gaagctgctggc
PG-4:7ed64960-07a4-4574-8739-89a5ecb31ad5 cctcattgaggattctttctctttcttcagtcgtgaacaggacctgcaaaagctgctggc
WT ------------------------------------------------------------
White spotted aatcgtcccacgtgggctgatgggtaaaaagaacagagtctaataaatcaataagccctg
Cell: Read name and sequence
CRFK:b7c5b596-3c70-45bb-b00c-988c08291521 ------------------------------------------------------------
CRFK:4f28cb2e-0b77-4276-927b-22cf1cd859a9 ------------------------------------------------------------
CRFK:1a121a2d-cbd1-4954-953a-c59b730e8896 ------------------------------------------------------------
CRFK:5cc67035-40b4-4180-8075-baa2bb4be3e7 ------------------------------------------------------------
PG-4:1d375068-d36d-463b-a23b-b79a65e7211e ------------------------------------------------------------
PG-4:22777b42-f4c6-4e0d-994b-27b1798695bb aatcgtcccacgtgggctgatgggtaaaaagaacagagtctaataaatcaataagccctg
PG-4:befbbc54-737b-4de1-802e-a01ed3fea542 aatcgtcccacgtgggctgatgggtaaaaagaacagagtctaataaatcaataagccctg
PG-4:9baf3e20-d0e4-4767-94ac-af0d2ef545da ------------------------------------------------------------
PG-4:8bc2a176-7ea8-4825-a2f8-488be22f49bf aatcgtcccacgtgggctgatgggtaaaatagagagccaggtgtaaatcaataaagcgtt
PG-4:7ed64960-07a4-4574-8739-89a5ecb31ad5 aatcgtcccacgtgggctgatgggtaaaaagaacagagtctaataaatcaataagccctg
WT ------------------------------------------------------------
White spotted ccggtttctcagaaaacttaggattctgagctttccaattgtagaggtcactagtggcga
Cell: Read name and sequence
CRFK:b7c5b596-3c70-45bb-b00c-988c08291521 ------------------------------------------------------------
CRFK:4f28cb2e-0b77-4276-927b-22cf1cd859a9 ------------------------------------------------------------
CRFK:1a121a2d-cbd1-4954-953a-c59b730e8896 ------------------------------------------------------------
CRFK:5cc67035-40b4-4180-8075-baa2bb4be3e7 ------------------------------------------------------------
PG-4:1d375068-d36d-463b-a23b-b79a65e7211e ------------------------------------------------------------
PG-4:22777b42-f4c6-4e0d-994b-27b1798695bb ccggtttctcagaaaacttaggattctgagctttccaattgtagaggtcactagtggcga
PG-4:befbbc54-737b-4de1-802e-a01ed3fea542 ccggtttctcagaaaacttaggattctgagctttccaattgtagaggtcactagtggcga
PG-4:9baf3e20-d0e4-4767-94ac-af0d2ef545da ------------------------------------------------------------
PG-4:8bc2a176-7ea8-4825-a2f8-488be22f49bf tgg---ttttagaaaacttaggattctgagctttccaattgtagaggtcactagtggcga
PG-4:7ed64960-07a4-4574-8739-89a5ecb31ad5 ccggtttctcagaaaacttaggattctgagctttccaattgtagaggtcactagtggcga
WT ------------------------------------------------------------
White spotted aaggccaatagtgatggggctgattcccctccgcgtctgggggtccggtggctcgcaggg
Cell: Read name and sequence
CRFK:b7c5b596-3c70-45bb-b00c-988c08291521 ------------------------------------------------------------
CRFK:4f28cb2e-0b77-4276-927b-22cf1cd859a9 ------------------------------------------------------------
CRFK:1a121a2d-cbd1-4954-953a-c59b730e8896 ------------------------------------------------------------
CRFK:5cc67035-40b4-4180-8075-baa2bb4be3e7 ------------------------------------------------------------
PG-4:1d375068-d36d-463b-a23b-b79a65e7211e ------------------------------------------------------------
PG-4:22777b42-f4c6-4e0d-994b-27b1798695bb aaggccaatagtgatggggctgattcccctccgcgtctgggggtccggtggctcgcaggg
PG-4:befbbc54-737b-4de1-802e-a01ed3fea542 aaggccaatagtgatggggctgattcccctccgcgtctgggggtccggtggctcgcaggg
PG-4:9baf3e20-d0e4-4767-94ac-af0d2ef545da ------------------------------------------------------------
PG-4:8bc2a176-7ea8-4825-a2f8-488be22f49bf aaggccaatagtgatggggctgattcccctccgcgtct-ggggtccggtggctcgca-gg
PG-4:7ed64960-07a4-4574-8739-89a5ecb31ad5 aaggccaatagtgatggggctgattcccctccgcgtctgggggtccggtggctcgcaggg
WT ------------------------------------------------------------
White spotted gcagaatagtggagtcggcggtggaggcggattgctccctctgagccctttgtctggtaa
Cell: Read name and sequence
CRFK:b7c5b596-3c70-45bb-b00c-988c08291521 ------------------------------------------------------------
CRFK:4f28cb2e-0b77-4276-927b-22cf1cd859a9 ------------------------------------------------------------
CRFK:1a121a2d-cbd1-4954-953a-c59b730e8896 ------------------------------------------------------------
CRFK:5cc67035-40b4-4180-8075-baa2bb4be3e7 ------------------------------------------------------------
PG-4:1d375068-d36d-463b-a23b-b79a65e7211e ------------------------------------------------------------
PG-4:22777b42-f4c6-4e0d-994b-27b1798695bb gcagaatagtggagtcggcggtggaggcggattgctccctctgagccctttgtctggtaa
PG-4:befbbc54-737b-4de1-802e-a01ed3fea542 gcagaatagtggagtcggcggtggaggcggattgctccctctgagccctttgtctggtaa
PG-4:9baf3e20-d0e4-4767-94ac-af0d2ef545da ------------------------------------------------------------
PG-4:8bc2a176-7ea8-4825-a2f8-488be22f49bf gcagaatagtggagtcggcggtggaggcggattgctccctctgagccctttgtctggtaa
PG-4:7ed64960-07a4-4574-8739-89a5ecb31ad5 gcagaatagtggagtcggcggtggaggcggattgctccctctgagccctttgtctggtaa
WT ------------------------------------------------------------
White spotted atggcgggcttccccctggagtgtttccgcctcccgctctcggaacagcgtgtgcctccc
Cell: Read name and sequence
CRFK:b7c5b596-3c70-45bb-b00c-988c08291521 ------------------------------------------------------------
CRFK:4f28cb2e-0b77-4276-927b-22cf1cd859a9 ------------------------------------------------------------
CRFK:1a121a2d-cbd1-4954-953a-c59b730e8896 ------------------------------------------------------------
CRFK:5cc67035-40b4-4180-8075-baa2bb4be3e7 ------------------------------------------------------------
PG-4:1d375068-d36d-463b-a23b-b79a65e7211e ------------------------------------------------------------
PG-4:22777b42-f4c6-4e0d-994b-27b1798695bb atggcgggcttccccctggagtgtttccgcctcccgctctcggaacagcgtgtgcctccc
PG-4:befbbc54-737b-4de1-802e-a01ed3fea542 atggcgggcttccccctggagtgtttccgcctcccgctctcggaacagcgtgtgcctccc
PG-4:9baf3e20-d0e4-4767-94ac-af0d2ef545da ------------------------------------------------------------
PG-4:8bc2a176-7ea8-4825-a2f8-488be22f49bf atggcgagctt-cccctggagtgtttccgcctcccgctctcggaacagcgtgtgcctccc
PG-4:7ed64960-07a4-4574-8739-89a5ecb31ad5 atggcgggcttccccctggagtgtttccgcctcccgctctcggaacagcgtgtgcctccc
WT ------------------------------------------------------------
White spotted ccggagggggaggatggcgttcttccggcatcctagaggggttatacgggggaggaaaaa
Cell: Read name and sequence
CRFK:b7c5b596-3c70-45bb-b00c-988c08291521 ------------------------------------------------------------
CRFK:4f28cb2e-0b77-4276-927b-22cf1cd859a9 ------------------------------------------------------------
CRFK:1a121a2d-cbd1-4954-953a-c59b730e8896 ------------------------------------------------------------
CRFK:5cc67035-40b4-4180-8075-baa2bb4be3e7 ------------------------------------------------------------
PG-4:1d375068-d36d-463b-a23b-b79a65e7211e ------------------------------------------------------------
PG-4:22777b42-f4c6-4e0d-994b-27b1798695bb ccggagggggaggatggcgttcttccggcatcctagaggggttatacgggggaggaaaaa
PG-4:befbbc54-737b-4de1-802e-a01ed3fea542 ccggagggggaggatggcgttcttccggcatcctagaggggttatacgggggaggaaaaa
PG-4:9baf3e20-d0e4-4767-94ac-af0d2ef545da ------------------------------------------------------------
PG-4:8bc2a176-7ea8-4825-a2f8-488be22f49bf ccggagggggaggatggcgttcttccggcatcctagaggggttatac--gggaggaaaaa
PG-4:7ed64960-07a4-4574-8739-89a5ecb31ad5 ccggagggggaggatggcgttcttccggcatcctagaggggttatacgggggaggaaaaa
WT ------------------------------------------------------------
White spotted ttaattcttcttcagtacccccctgtaggacagggtagaggggtgctgaaggctgggtaa
Cell: Read name and sequence
CRFK:b7c5b596-3c70-45bb-b00c-988c08291521 ------------------------------------------------------------
CRFK:4f28cb2e-0b77-4276-927b-22cf1cd859a9 ------------------------------------------------------------
CRFK:1a121a2d-cbd1-4954-953a-c59b730e8896 ------------------------------------------------------------
CRFK:5cc67035-40b4-4180-8075-baa2bb4be3e7 ------------------------------------------------------------
PG-4:1d375068-d36d-463b-a23b-b79a65e7211e ------------------------------------------------------------
PG-4:22777b42-f4c6-4e0d-994b-27b1798695bb ttaattcttcttcagtacccccctgtaggacagggtagaggggtgctgaaggctgggtaa
PG-4:befbbc54-737b-4de1-802e-a01ed3fea542 ttaattcttcttcagtacccccctgtaggacagggtagaggggtgctgaaggctgggtaa
PG-4:9baf3e20-d0e4-4767-94ac-af0d2ef545da ------------------------------------------------------------
PG-4:8bc2a176-7ea8-4825-a2f8-488be22f49bf ttaattcttcttcagtacccccctgtaggacagggtagaggggtgctgaaggctgggtaa
PG-4:7ed64960-07a4-4574-8739-89a5ecb31ad5 ttaattcttcttcagtacccccctgtaggacagggtagaggggtgctgaaggctgggtaa
WT ------------------------------------------------------------
White spotted gacgtttcctcttctctgtctcctgcaaaacaagaatagggattttggctccggaggaag
Cell: Read name and sequence
CRFK:b7c5b596-3c70-45bb-b00c-988c08291521 ------------------------------------------------------------
CRFK:4f28cb2e-0b77-4276-927b-22cf1cd859a9 ------------------------------------------------------------
CRFK:1a121a2d-cbd1-4954-953a-c59b730e8896 ------------------------------------------------------------
CRFK:5cc67035-40b4-4180-8075-baa2bb4be3e7 ------------------------------------------------------------
PG-4:1d375068-d36d-463b-a23b-b79a65e7211e ------------------------------------------------------------
PG-4:22777b42-f4c6-4e0d-994b-27b1798695bb gacgtttcctcttctctgtctcctgcaaagcaagaat--gggttttggctccggagggag
PG-4:befbbc54-737b-4de1-802e-a01ed3fea542 gacgtttcctcttctctgtctcctgcaaagcaagaat--gggttttggctccggagggag
PG-4:9baf3e20-d0e4-4767-94ac-af0d2ef545da ------------------------------------------------------------
PG-4:8bc2a176-7ea8-4825-a2f8-488be22f49bf gacgtttcctcttctctgtctcctgcaaagcaagaat--gggttttggctccggagggag
PG-4:7ed64960-07a4-4574-8739-89a5ecb31ad5 gacgtttcctcttctctgtctcctgcaaagcaagaat--gggttttggctccggagggag
WT ------------------------------------------------------------
White spotted cagggttaggaagggcttaagccaagagggtgggtcttctacaaggtcctgccaagtgat
Cell: Read name and sequence
CRFK:b7c5b596-3c70-45bb-b00c-988c08291521 ------------------------------------------------------------
CRFK:4f28cb2e-0b77-4276-927b-22cf1cd859a9 ------------------------------------------------------------
CRFK:1a121a2d-cbd1-4954-953a-c59b730e8896 ------------------------------------------------------------
CRFK:5cc67035-40b4-4180-8075-baa2bb4be3e7 ------------------------------------------------------------
PG-4:1d375068-d36d-463b-a23b-b79a65e7211e ------------------------------------------------------------
PG-4:22777b42-f4c6-4e0d-994b-27b1798695bb cagggttaggaagggcttaagccaagagggtgggtcttctacaaggtcctgccaagtgat
PG-4:befbbc54-737b-4de1-802e-a01ed3fea542 cagggttaggaagggcttaagccaagagggtgggtcttctacaaggtcctgccaagtgat
PG-4:9baf3e20-d0e4-4767-94ac-af0d2ef545da ------------------------------------------------------------
PG-4:8bc2a176-7ea8-4825-a2f8-488be22f49bf cagggttaggaagggcttaagccaagagggtgggtcttctacaaggtcctgccaagtgat
PG-4:7ed64960-07a4-4574-8739-89a5ecb31ad5 cagggttaggaagggcttaagccaagagggtgggtcttctacaaggtcctgccaagtgat
WT ------------------------------------------------------------
White spotted aatgtaagggagctgat-caagatggcccgtcttaggctgagagatgatactcctgactc
Cell: Read name and sequence
CRFK:b7c5b596-3c70-45bb-b00c-988c08291521 ------------------------------------------------------------
CRFK:4f28cb2e-0b77-4276-927b-22cf1cd859a9 ------------------------------------------------------------
CRFK:1a121a2d-cbd1-4954-953a-c59b730e8896 ------------------------------------------------------------
CRFK:5cc67035-40b4-4180-8075-baa2bb4be3e7 ------------------------------------------------------------
PG-4:1d375068-d36d-463b-a23b-b79a65e7211e ------------------------------------------------------------
PG-4:22777b42-f4c6-4e0d-994b-27b1798695bb aatgtaagggagctgat-caagatggcccgtcttaggctgagagatgatactcctgactc
PG-4:befbbc54-737b-4de1-802e-a01ed3fea542 aatgtaagggagctgat-caagatggcccgtcttaggctgagagatgatactcctgactc
PG-4:9baf3e20-d0e4-4767-94ac-af0d2ef545da ------------------------------------------------------------
PG-4:8bc2a176-7ea8-4825-a2f8-488be22f49bf aatgtaagggagctgatccaagatggcccgtcttaggctgagagatgatactcctgactc
PG-4:7ed64960-07a4-4574-8739-89a5ecb31ad5 aatgtaagggagctgat-caagatggcccgtcttaggctgagagatgatactcctgactc
WT ------------------------------------------------------------
White spotted ggtggatggtagggaggtcgaaggtcccctctggtggccatccgacattgaaagttggcc
Cell: Read name and sequence
CRFK:b7c5b596-3c70-45bb-b00c-988c08291521 ------------------------------------------------------------
CRFK:4f28cb2e-0b77-4276-927b-22cf1cd859a9 ------------------------------------------------------------
CRFK:1a121a2d-cbd1-4954-953a-c59b730e8896 ------------------------------------------------------------
CRFK:5cc67035-40b4-4180-8075-baa2bb4be3e7 ------------------------------------------------------------
PG-4:1d375068-d36d-463b-a23b-b79a65e7211e ------------------------------------------------------------
PG-4:22777b42-f4c6-4e0d-994b-27b1798695bb ggtggatggtagggaggtcgaaggtcccctctggtggccatccgacattgaaagttggcc
PG-4:befbbc54-737b-4de1-802e-a01ed3fea542 ggtggatggtagggaggtcgaaggtcccctctggtggccatccgacattgaaagttggcc
PG-4:9baf3e20-d0e4-4767-94ac-af0d2ef545da ------------------------------------------------------------
PG-4:8bc2a176-7ea8-4825-a2f8-488be22f49bf ggtggatggtaggagg--tcaaggtcccctctggtggccatccgacattgaaagttggcc
PG-4:7ed64960-07a4-4574-8739-89a5ecb31ad5 ggtggatggtagggaggtcgaaggtcccctctggtggccatccgacattgaaagttggcc
WT ------------------------------------------------------------
White spotted actcgctagaacaaaaaaactgcaaccgaccctttcggacttccacactgaggttgttag
Cell: Read name and sequence
CRFK:b7c5b596-3c70-45bb-b00c-988c08291521 ------------------------------------------------------------
CRFK:4f28cb2e-0b77-4276-927b-22cf1cd859a9 ------------------------------------------------------------
CRFK:1a121a2d-cbd1-4954-953a-c59b730e8896 ------------------------------------------------------------
CRFK:5cc67035-40b4-4180-8075-baa2bb4be3e7 ------------------------------------------------------------
PG-4:1d375068-d36d-463b-a23b-b79a65e7211e ------------------------------------------------------------
PG-4:22777b42-f4c6-4e0d-994b-27b1798695bb actcgctagaac-aaaaaactgcaaccgaccctttcggacttccacactgaggttgttag
PG-4:befbbc54-737b-4de1-802e-a01ed3fea542 actcgctagaacaaaaaaactgcaaccgaccctttcggacttccacactgaggttgttag
PG-4:9baf3e20-d0e4-4767-94ac-af0d2ef545da ------------------------------------------------------------
PG-4:8bc2a176-7ea8-4825-a2f8-488be22f49bf actcgctagaacaaaaaaactgcaaccgaccctttcggacttccacactgaggttgttag
PG-4:7ed64960-07a4-4574-8739-89a5ecb31ad5 actcgctagaacaaaaaaactgcaaccgaccctttcggacttccacactgaggttgttag
WT ------------------------------------------------------------
White spotted ctcttcccctcacatccttaaagtgatcaatcataatacttagaggagtagtctgagtct
Cell: Read name and sequence
CRFK:b7c5b596-3c70-45bb-b00c-988c08291521 ------------------------------------------------------------
CRFK:4f28cb2e-0b77-4276-927b-22cf1cd859a9 ------------------------------------------------------------
CRFK:1a121a2d-cbd1-4954-953a-c59b730e8896 ------------------------------------------------------------
CRFK:5cc67035-40b4-4180-8075-baa2bb4be3e7 ------------------------------------------------------------
PG-4:1d375068-d36d-463b-a23b-b79a65e7211e ------------------------------------------------------------
PG-4:22777b42-f4c6-4e0d-994b-27b1798695bb ctcttcccctcacatccttaaagtgatcaatcataatacttagaggagtagtctgagtct
PG-4:befbbc54-737b-4de1-802e-a01ed3fea542 ctcttcccctcacatccttaaagtgatcaatcataatacttagaggagtagtctgagtct
PG-4:9baf3e20-d0e4-4767-94ac-af0d2ef545da ------------------------------------------------------------
PG-4:8bc2a176-7ea8-4825-a2f8-488be22f49bf ctcttcccctcacatccttaaagtgatcaatcataatacttagaggagtagtctgagtct
PG-4:7ed64960-07a4-4574-8739-89a5ecb31ad5 ctcttcccctcacatcctt--agtgatcaatcataatacttagaggagtagtctgagtct
WT ------------------------------------------------------------
White spotted gtcccataatgtccgtcc-agtaagtccacagagcaaaacagagaaacacaaaaacagac
Cell: Read name and sequence
CRFK:b7c5b596-3c70-45bb-b00c-988c08291521 ------------------------------------------------------------
CRFK:4f28cb2e-0b77-4276-927b-22cf1cd859a9 ------------------------------------------------------------
CRFK:1a121a2d-cbd1-4954-953a-c59b730e8896 ------------------------------------------------------------
CRFK:5cc67035-40b4-4180-8075-baa2bb4be3e7 ------------------------------------------------------------
PG-4:1d375068-d36d-463b-a23b-b79a65e7211e ------------------------------------------------------------
PG-4:22777b42-f4c6-4e0d-994b-27b1798695bb gtcccataatgtccgtcc-agtaagtccacagagcaaaacagagaaacacaaaaacagac
PG-4:befbbc54-737b-4de1-802e-a01ed3fea542 gtcccataatgtccgtccaagtaagtccacagagcaaaacagagaaacacaaaaacagac
PG-4:9baf3e20-d0e4-4767-94ac-af0d2ef545da ------------------------------------------------------------
PG-4:8bc2a176-7ea8-4825-a2f8-488be22f49bf gtcccataatgtccgtcc-agtaagtccacagagcaaaacagag-aacacaaaaacagac
PG-4:7ed64960-07a4-4574-8739-89a5ecb31ad5 gtcccataatgtccgtcc-agtaagtccacagagcaaaacagagaaacacaaaaacagac
WT ------------------------------------------------------------
White spotted aaacagagggcccctagaaagtcttccaactccatggaagcaaaacggaaagctagcttt
Cell: Read name and sequence
CRFK:b7c5b596-3c70-45bb-b00c-988c08291521 ------------------------------------------------------------
CRFK:4f28cb2e-0b77-4276-927b-22cf1cd859a9 ------------------------------------------------------------
CRFK:1a121a2d-cbd1-4954-953a-c59b730e8896 ------------------------------------------------------------
CRFK:5cc67035-40b4-4180-8075-baa2bb4be3e7 ------------------------------------------------------------
PG-4:1d375068-d36d-463b-a23b-b79a65e7211e ------------------------------------------------------------
PG-4:22777b42-f4c6-4e0d-994b-27b1798695bb aaacagagggcccctagaaagtcttccaactccatggaagcaaaacggaaagctagcttt
PG-4:befbbc54-737b-4de1-802e-a01ed3fea542 aaacagagggcccctagaaagtcttccaactccatggaagcaaaacggaaagctagcttt
PG-4:9baf3e20-d0e4-4767-94ac-af0d2ef545da ------------------------------------------------------------
PG-4:8bc2a176-7ea8-4825-a2f8-488be22f49bf aaacagagggcccctagaaagtcttccatcat----ggagcaaaacggaaagctagcttt
PG-4:7ed64960-07a4-4574-8739-89a5ecb31ad5 aaacagagggcccctagaaagtcttccaactccatggaagcaaaacggaaagctagcttt
WT ------------------------------------------------------------
White spotted tgaggggattccatgtccctccaaaaccgatgaggggattccacgtccctccaaagacga
Cell: Read name and sequence
CRFK:b7c5b596-3c70-45bb-b00c-988c08291521 ------------------------------------------------------------
CRFK:4f28cb2e-0b77-4276-927b-22cf1cd859a9 ------------------------------------------------------------
CRFK:1a121a2d-cbd1-4954-953a-c59b730e8896 ------------------------------------------------------------
CRFK:5cc67035-40b4-4180-8075-baa2bb4be3e7 ------------------------------------------------------------
PG-4:1d375068-d36d-463b-a23b-b79a65e7211e ------------------------------------------------------------
PG-4:22777b42-f4c6-4e0d-994b-27b1798695bb tgaggggattccatgtccctccaaaaccgatgaggggattccacgtccctccaaagacga
PG-4:befbbc54-737b-4de1-802e-a01ed3fea542 tgaggggattccatgtccctccaaaaccgatgaggggattccacgtccctccaaagacga
PG-4:9baf3e20-d0e4-4767-94ac-af0d2ef545da ------------------------------------------------------------
PG-4:8bc2a176-7ea8-4825-a2f8-488be22f49bf tgaggggattccatgtccctccaaaaccgatgaggggattccacgtccctcc-aagacga
PG-4:7ed64960-07a4-4574-8739-89a5ecb31ad5 tgaggggattccatgtccctccaaaaccgatgaggggattccacgtccctccaaagacga
WT ------------------------------------------------------------
White spotted cggcctcacgccgaccagcgggagcgacccgcctcgtctcagacctttgaggggattcca
Cell: Read name and sequence
CRFK:b7c5b596-3c70-45bb-b00c-988c08291521 ------------------------------------------------------------
CRFK:4f28cb2e-0b77-4276-927b-22cf1cd859a9 ------------------------------------------------------------
CRFK:1a121a2d-cbd1-4954-953a-c59b730e8896 ------------------------------------------------------------
CRFK:5cc67035-40b4-4180-8075-baa2bb4be3e7 ------------------------------------------------------------
PG-4:1d375068-d36d-463b-a23b-b79a65e7211e ------------------------------------------------------------
PG-4:22777b42-f4c6-4e0d-994b-27b1798695bb cggcctcacgccgaccagcgggagcgacccgcctcgtctcagacctttgaggggattcca
PG-4:befbbc54-737b-4de1-802e-a01ed3fea542 cggcctcacgccgaccagcgggagcgacccgcctcgtctcagacctttgaggggattcca
PG-4:9baf3e20-d0e4-4767-94ac-af0d2ef545da ------------------------------------------------------------
PG-4:8bc2a176-7ea8-4825-a2f8-488be22f49bf cggcctcacgccgaccagcgggagcgacccgctccgtctcagacctttgaggggattcca
PG-4:7ed64960-07a4-4574-8739-89a5ecb31ad5 cggcctcacgccgaccagcgggagcgacccgcctcgtctcagacctttgaggggattcca
WT ------------------------------------------------------------
White spotted cgtccctccagaagggagaatcggaacgtcttccgag-actcccggcccgtggtcctcca
Cell: Read name and sequence
CRFK:b7c5b596-3c70-45bb-b00c-988c08291521 ------------------------------------------------------------
CRFK:4f28cb2e-0b77-4276-927b-22cf1cd859a9 ------------------------------------------------------------
CRFK:1a121a2d-cbd1-4954-953a-c59b730e8896 ------------------------------------------------------------
CRFK:5cc67035-40b4-4180-8075-baa2bb4be3e7 ------------------------------------------------------------
PG-4:1d375068-d36d-463b-a23b-b79a65e7211e ------------------------------------------------------------
PG-4:22777b42-f4c6-4e0d-994b-27b1798695bb cgtccctccagaagggagaatcggaacgtcttccgag-actcccggcccgtggtcctcca
PG-4:befbbc54-737b-4de1-802e-a01ed3fea542 cgtccctccagaagggagaatcggaacgtcttccgag-actcccggcccgtggtcctcca
PG-4:9baf3e20-d0e4-4767-94ac-af0d2ef545da ------------------------------------------------------------
PG-4:8bc2a176-7ea8-4825-a2f8-488be22f49bf cgtccctccagaagggagaatcggaacgtcttccgag-actcccggcccgtggtcctcca
PG-4:7ed64960-07a4-4574-8739-89a5ecb31ad5 cgtccctccagaagggagaatcggaacgtcttccgagtactcccggcccgtggtcctcca
WT ------------------------------------------------------------
White spotted gtgcgtccacctagaccgcgtcgggcactaccagaattccagaaatgagctcacacagaa
Cell: Read name and sequence
CRFK:b7c5b596-3c70-45bb-b00c-988c08291521 ------------------------------------------------------------
CRFK:4f28cb2e-0b77-4276-927b-22cf1cd859a9 ------------------------------------------------------------
CRFK:1a121a2d-cbd1-4954-953a-c59b730e8896 ------------------------------------------------------------
CRFK:5cc67035-40b4-4180-8075-baa2bb4be3e7 ------------------------------------------------------------
PG-4:1d375068-d36d-463b-a23b-b79a65e7211e ------------------------------------------------------------
PG-4:22777b42-f4c6-4e0d-994b-27b1798695bb gtgcgtccacctagaccgcgtcgggcactaccagaattccagaaatgagctcacacagaa
PG-4:befbbc54-737b-4de1-802e-a01ed3fea542 gtgcgtccacctagaccgcgtcgggcactaccagaattccagaaatgagctcacacagaa
PG-4:9baf3e20-d0e4-4767-94ac-af0d2ef545da ------------------------------------------------------------
PG-4:8bc2a176-7ea8-4825-a2f8-488be22f49bf gtgcgtccacctagaccgcgtcgggtactaccagaattccagaaatgagctcacacagaa
PG-4:7ed64960-07a4-4574-8739-89a5ecb31ad5 gtgcgtccacctagaccgcgtcgggcactaccagaattccagaaatgagctcacacagaa
WT ------------------------------------------------------------
White spotted aagacagaacaaacagacact-accgtggcc--agtcaggctctccgggtc-gggggtcc
Cell: Read name and sequence
CRFK:b7c5b596-3c70-45bb-b00c-988c08291521 ------------------------------------------------------------
CRFK:4f28cb2e-0b77-4276-927b-22cf1cd859a9 ------------------------------------------------------------
CRFK:1a121a2d-cbd1-4954-953a-c59b730e8896 ------------------------------------------------------------
CRFK:5cc67035-40b4-4180-8075-baa2bb4be3e7 ------------------------------------------------------------
PG-4:1d375068-d36d-463b-a23b-b79a65e7211e ------------------------------------------------------------
PG-4:22777b42-f4c6-4e0d-994b-27b1798695bb aagacagaacaaacagacactaaccgtggcc--agtcaggctctccgggtc-gggggtcc
PG-4:befbbc54-737b-4de1-802e-a01ed3fea542 aagacagaacaaacagacactaaccgtggccagagtcaggctctccgggtcggggggtcc
PG-4:9baf3e20-d0e4-4767-94ac-af0d2ef545da ------------------------------------------------------------
PG-4:8bc2a176-7ea8-4825-a2f8-488be22f49bf aagacagaacaaacagacactaaccgtggcc--agtcaggctctccgggtc-gggggtcc
PG-4:7ed64960-07a4-4574-8739-89a5ecb31ad5 aagacagaacaaacagacactaaccgtggcc--agtcaggctctccgggtc-gggggtcc
WT ------------------------------------------------------------
White spotted ctcggggtcttggggatcccggacgagccccc-aatgttatgcccaaaattcgtgatccc
Cell: Read name and sequence
CRFK:b7c5b596-3c70-45bb-b00c-988c08291521 ------------------------------------------------------------
CRFK:4f28cb2e-0b77-4276-927b-22cf1cd859a9 ------------------------------------------------------------
CRFK:1a121a2d-cbd1-4954-953a-c59b730e8896 ------------------------------------------------------------
CRFK:5cc67035-40b4-4180-8075-baa2bb4be3e7 ------------------------------------------------------------
PG-4:1d375068-d36d-463b-a23b-b79a65e7211e ------------------------------------------------------------
PG-4:22777b42-f4c6-4e0d-994b-27b1798695bb ctcggggtcttggggatcccggacgagcccccaaatgttatgcccaaaattcgtgatccc
PG-4:befbbc54-737b-4de1-802e-a01ed3fea542 ctcggggtcttggggatcccggacgagcccccaaatgttatgcccaaaattcgtgatccc
PG-4:9baf3e20-d0e4-4767-94ac-af0d2ef545da ------------------------------------------------------------
PG-4:8bc2a176-7ea8-4825-a2f8-488be22f49bf ctctgggtcttggggatcccggatgagcccccaaatgttatgcccaaaattcgtgatccc
PG-4:7ed64960-07a4-4574-8739-89a5ecb31ad5 ctcggggtcttggggatcccggacgagcccccaaatgttatgcccaaaattcgtgatccc
WT ------------------------------------------------------------
White spotted caaagaccaccagggagccgagtccgatgcaaaagcaaagagcctttattcgagctagct
Cell: Read name and sequence
CRFK:b7c5b596-3c70-45bb-b00c-988c08291521 ------------------------------------------------------------
CRFK:4f28cb2e-0b77-4276-927b-22cf1cd859a9 ------------------------------------------------------------
CRFK:1a121a2d-cbd1-4954-953a-c59b730e8896 ------------------------------------------------------------
CRFK:5cc67035-40b4-4180-8075-baa2bb4be3e7 ------------------------------------------------------------
PG-4:1d375068-d36d-463b-a23b-b79a65e7211e ------------------------------------------------------------
PG-4:22777b42-f4c6-4e0d-994b-27b1798695bb caaagaccaccagggagccgagtccgatgcaaaagcaaagagcctttattcgagctagct
PG-4:befbbc54-737b-4de1-802e-a01ed3fea542 caaagaccaccagggagccgagtccgatgcaaaagcaaagagcctttattcgagctagct
PG-4:9baf3e20-d0e4-4767-94ac-af0d2ef545da ------------------------------------------------------------
PG-4:8bc2a176-7ea8-4825-a2f8-488be22f49bf caaagaccaccagggagccgagtccgatgcaaaagcaaagagcctttattcgagctagct
PG-4:7ed64960-07a4-4574-8739-89a5ecb31ad5 caaagaccaccagggagccgagtccgatgcaaaagcaaagagcctttattcgagctagct
WT ------------------------------------------------------------
White spotted cgagctcaatcccctacctgcaccgacgcagcggtgagataccagggaaagagcacgagt
Cell: Read name and sequence
CRFK:b7c5b596-3c70-45bb-b00c-988c08291521 ------------------------------------------------------------
CRFK:4f28cb2e-0b77-4276-927b-22cf1cd859a9 ------------------------------------------------------------
CRFK:1a121a2d-cbd1-4954-953a-c59b730e8896 ------------------------------------------------------------
CRFK:5cc67035-40b4-4180-8075-baa2bb4be3e7 ------------------------------------------------------------
PG-4:1d375068-d36d-463b-a23b-b79a65e7211e ------------------------------------------------------------
PG-4:22777b42-f4c6-4e0d-994b-27b1798695bb cgagctcaatcccctacctgcaccgacgcagcggtgagataccagggaaagagcacgagt
PG-4:befbbc54-737b-4de1-802e-a01ed3fea542 cgagctcaatcccctacctgcaccgacgcagcggtgagataccagggaaagagcacgagt
PG-4:9baf3e20-d0e4-4767-94ac-af0d2ef545da ------------------------------------------------------------
PG-4:8bc2a176-7ea8-4825-a2f8-488be22f49bf cgagctcaatcccctacctgcaccgacgcagcggtgagataccagggaaagagcacgagt
PG-4:7ed64960-07a4-4574-8739-89a5ecb31ad5 cgagctcaatcccctacctgcaccgacgcagcggtgagataccagggaaagagcacgagt
WT ------------------------------------------------------------
White spotted ttcaaaaaggacaaaggttttattggggcctgggggcagttggtgaggtaatggctgtgg
Cell: Read name and sequence
CRFK:b7c5b596-3c70-45bb-b00c-988c08291521 ------------------------------------------------------------
CRFK:4f28cb2e-0b77-4276-927b-22cf1cd859a9 ------------------------------------------------------------
CRFK:1a121a2d-cbd1-4954-953a-c59b730e8896 ------------------------------------------------------------
CRFK:5cc67035-40b4-4180-8075-baa2bb4be3e7 ------------------------------------------------------------
PG-4:1d375068-d36d-463b-a23b-b79a65e7211e ------------------------------------------------------------
PG-4:22777b42-f4c6-4e0d-994b-27b1798695bb ttcaaaaaggacaaaggttttattggggcctgggggcagttggtgaggtaatggctgtgg
PG-4:befbbc54-737b-4de1-802e-a01ed3fea542 ttcaaaaaggacaaaggttttattggggcctgggggcagttggtgaggtaatggctgtgg
PG-4:9baf3e20-d0e4-4767-94ac-af0d2ef545da ------------------------------------------------------------
PG-4:8bc2a176-7ea8-4825-a2f8-488be22f49bf ttcaaaaaggacaaaggttttattggggcctgggggcagttggtgaggtaatggctgtgg
PG-4:7ed64960-07a4-4574-8739-89a5ecb31ad5 ttcaaaaaggacaaaggttttattggggcctgggggcagttggtgaggtaatggctgtgg
WT ------------------------------------------------------------
White spotted cctcagctgattggctggggaggggtcctggggaagggtctggcaggtgagggagggttt
Cell: Read name and sequence
CRFK:b7c5b596-3c70-45bb-b00c-988c08291521 ------------------------------------------------------------
CRFK:4f28cb2e-0b77-4276-927b-22cf1cd859a9 ------------------------------------------------------------
CRFK:1a121a2d-cbd1-4954-953a-c59b730e8896 ------------------------------------------------------------
CRFK:5cc67035-40b4-4180-8075-baa2bb4be3e7 ------------------------------------------------------------
PG-4:1d375068-d36d-463b-a23b-b79a65e7211e ------------------------------------------------------------
PG-4:22777b42-f4c6-4e0d-994b-27b1798695bb cctcagctgattggctggggaggggtcctggggaagggtctggcaggtgagggagggttt
PG-4:befbbc54-737b-4de1-802e-a01ed3fea542 cctcagctgattggctggggaggggtcct-gggaagggtctggcaggtgagggagggttt
PG-4:9baf3e20-d0e4-4767-94ac-af0d2ef545da ------------------------------------------------------------
PG-4:8bc2a176-7ea8-4825-a2f8-488be22f49bf cctcagctgattggctggggaggggtcct-gggaagggtctggcaggtgagggagggttt
PG-4:7ed64960-07a4-4574-8739-89a5ecb31ad5 cctcagctgattggctggggaggggtcctggggaagggtctggcaggtgagggagggttt
WT ------------------------------------------------------------
White spotted actcaaggggaggaggtgtggtcaaggtgaaggacacagaacaagatggcgaggggagga
Cell: Read name and sequence
CRFK:b7c5b596-3c70-45bb-b00c-988c08291521 ------------------------------------------------------------
CRFK:4f28cb2e-0b77-4276-927b-22cf1cd859a9 ------------------------------------------------------------
CRFK:1a121a2d-cbd1-4954-953a-c59b730e8896 ------------------------------------------------------------
CRFK:5cc67035-40b4-4180-8075-baa2bb4be3e7 ------------------------------------------------------------
PG-4:1d375068-d36d-463b-a23b-b79a65e7211e ------------------------------------------------------------
PG-4:22777b42-f4c6-4e0d-994b-27b1798695bb actcaaggggaggaggtgtggtcaaggtgaaggacacagaacaagatggcgaggggagga
PG-4:befbbc54-737b-4de1-802e-a01ed3fea542 actcaaggggaggaggtgtggtcaaggtgaaggacacagaacaagatggcgaggggagga
PG-4:9baf3e20-d0e4-4767-94ac-af0d2ef545da ------------------------------------------------------------
PG-4:8bc2a176-7ea8-4825-a2f8-488be22f49bf actcaaggggaggaggtgtggtcaaggtgaaggacacagaacaagatggcgaggggagga
PG-4:7ed64960-07a4-4574-8739-89a5ecb31ad5 actcaaggggaggaggtgtggtcaaggtgaaggacacagaacaagatggcgaggggagga
WT ------------------------------------------------------------
White spotted ggtgtggtcaaggtgaaggacacagaacaagatggcgaggggaggaggtgtggtcaaggt
Cell: Read name and sequence
CRFK:b7c5b596-3c70-45bb-b00c-988c08291521 ------------------------------------------------------------
CRFK:4f28cb2e-0b77-4276-927b-22cf1cd859a9 ------------------------------------------------------------
CRFK:1a121a2d-cbd1-4954-953a-c59b730e8896 ------------------------------------------------------------
CRFK:5cc67035-40b4-4180-8075-baa2bb4be3e7 ------------------------------------------------------------
PG-4:1d375068-d36d-463b-a23b-b79a65e7211e ------------------------------------------------------------
PG-4:22777b42-f4c6-4e0d-994b-27b1798695bb ggtgtggtcaaggtgaaggacacagaacaagatggcgaggggaggaggtgtggtcaaggt
PG-4:befbbc54-737b-4de1-802e-a01ed3fea542 ggtgtggtcaaggtgaaggacacagaacaagatggcgaggggaggaggtgtggtcaaggt
PG-4:9baf3e20-d0e4-4767-94ac-af0d2ef545da ------------------------------------------------------------
PG-4:8bc2a176-7ea8-4825-a2f8-488be22f49bf ggtgtggtcaaggtgaaggacacagaacaagatggcgaggggaggaggtgtggtcaaggt
PG-4:7ed64960-07a4-4574-8739-89a5ecb31ad5 ggtgtggtcaaggtgaaggacacagaacaagatggcgagg---ggaggtgtggtcaaggt
WT ------------------------------------------------------------
White spotted gaaggacacagaacaagatggcgaggggaggaggtgtggtcaaggtgaaggacacagaac
Cell: Read name and sequence
CRFK:b7c5b596-3c70-45bb-b00c-988c08291521 ------------------------------------------------------------
CRFK:4f28cb2e-0b77-4276-927b-22cf1cd859a9 ------------------------------------------------------------
CRFK:1a121a2d-cbd1-4954-953a-c59b730e8896 ------------------------------------------------------------
CRFK:5cc67035-40b4-4180-8075-baa2bb4be3e7 ------------------------------------------------------------
PG-4:1d375068-d36d-463b-a23b-b79a65e7211e ------------------------------------------------------------
PG-4:22777b42-f4c6-4e0d-994b-27b1798695bb gaaggacacagaacaagatggcgaggggaggaggtgtggtcaaggtgaaggacacagaac
PG-4:befbbc54-737b-4de1-802e-a01ed3fea542 gaaggacacagaacaagatggcgaggggaggaggtgtggtcaaggtgaaggacacagaac
PG-4:9baf3e20-d0e4-4767-94ac-af0d2ef545da ------------------------------------------------------------
PG-4:8bc2a176-7ea8-4825-a2f8-488be22f49bf gaaggacacagaacaagatggcgaggggaggaggtgtggtcaaggtgaaggacacagaac
PG-4:7ed64960-07a4-4574-8739-89a5ecb31ad5 gaaggacacagaacaagatggcgaggggaggaggtgtggtcaaggtgaaggacacagaac
WT ------------------------------------------------------------
White spotted aagatggcgaggggaggaggtgtggtcaaggtgaaggacacagaacaagatggcgagggg
Cell: Read name and sequence
CRFK:b7c5b596-3c70-45bb-b00c-988c08291521 ------------------------------------------------------------
CRFK:4f28cb2e-0b77-4276-927b-22cf1cd859a9 ------------------------------------------------------------
CRFK:1a121a2d-cbd1-4954-953a-c59b730e8896 ------------------------------------------------------------
CRFK:5cc67035-40b4-4180-8075-baa2bb4be3e7 ------------------------------------------------------------
PG-4:1d375068-d36d-463b-a23b-b79a65e7211e ------------------------------------------------------------
PG-4:22777b42-f4c6-4e0d-994b-27b1798695bb aagatggcgaggggaggaggtgtggtcaaggtgaaggacacagaacaagatggcgagggg
PG-4:befbbc54-737b-4de1-802e-a01ed3fea542 aagatggcgaggggaggaggtgtggtcaaggtgaaggacacagaacaagatggcgagggg
PG-4:9baf3e20-d0e4-4767-94ac-af0d2ef545da ------------------------------------------------------------
PG-4:8bc2a176-7ea8-4825-a2f8-488be22f49bf aagatggcgaggggaggaggtgtggtcaaggtgaaggacacagaacaagatggcgagggg
PG-4:7ed64960-07a4-4574-8739-89a5ecb31ad5 aagatggcgaggggaggaggtgtggtcaaggtgaaggacacagaacaagatggcgagggg
WT ------------------------------------------------------------
White spotted aggaggtgtggtcaaggtgaaggacacagaacaagatggcgaggggaggaggtgtggtca
Cell: Read name and sequence
CRFK:b7c5b596-3c70-45bb-b00c-988c08291521 ------------------------------------------------------------
CRFK:4f28cb2e-0b77-4276-927b-22cf1cd859a9 ------------------------------------------------------------
CRFK:1a121a2d-cbd1-4954-953a-c59b730e8896 ------------------------------------------------------------
CRFK:5cc67035-40b4-4180-8075-baa2bb4be3e7 ------------------------------------------------------------
PG-4:1d375068-d36d-463b-a23b-b79a65e7211e ------------------------------------------------------------
PG-4:22777b42-f4c6-4e0d-994b-27b1798695bb aggaggtgtggtcaaggtgaaggacacagaacaagatggcgaggggaggaggtgtggtca
PG-4:befbbc54-737b-4de1-802e-a01ed3fea542 aggaggtgtggtcaaggtgaaggacacagaacaagatggcgaggggaggaggtgtggtca
PG-4:9baf3e20-d0e4-4767-94ac-af0d2ef545da ------------------------------------------------------------
PG-4:8bc2a176-7ea8-4825-a2f8-488be22f49bf aggaggtgtggtcaaggtgaaggacacagaacaagatggcgaggggaggaggtgtggtca
PG-4:7ed64960-07a4-4574-8739-89a5ecb31ad5 aggaggtgtggtcaaggtgaaggacacagaacaagatggcgaggggaggaggtgtggtca
WT ---------------------------------------------------------ctg
White spotted aggtgaaggtcacagaacaagatggcgacggctggcgtaggcccgccctttcactttctg
Cell: Read name and sequence
CRFK:b7c5b596-3c70-45bb-b00c-988c08291521 ---------------------------------------------------------ctg
CRFK:4f28cb2e-0b77-4276-927b-22cf1cd859a9 ---------------------------------------------------------ctg
CRFK:1a121a2d-cbd1-4954-953a-c59b730e8896 ---------------------------------------------------------ctg
CRFK:5cc67035-40b4-4180-8075-baa2bb4be3e7 ---------------------------------------------------------ctg
PG-4:1d375068-d36d-463b-a23b-b79a65e7211e ------------------------------------------------------------
PG-4:22777b42-f4c6-4e0d-994b-27b1798695bb aggtgaaggtcacagaacaagatggcgacggctggcgtaggcccgccctttcactttctg
PG-4:befbbc54-737b-4de1-802e-a01ed3fea542 aggtgaaggtcacagaacaagatggcgacggctggcgtaggcccgccctttcactttctg
PG-4:9baf3e20-d0e4-4767-94ac-af0d2ef545da ---------------------------------------------------------ctg
PG-4:8bc2a176-7ea8-4825-a2f8-488be22f49bf aggtgaaggtcacagaacaagatggcgacggctggcgtaggcctgccctttcac----tt
PG-4:7ed64960-07a4-4574-8739-89a5ecb31ad5 aggtgaaggtcacagaacaagatggcgacggctggcgtaggcccgccctttcactttctg
WT caaaatctta---cttggatcctaaagctgtagtgaaaatcc-ggttttatctgcgcggg
White spotted caaaatctta---cttggatcctaaagctgtagtgaaaatcc-ggttttatctgcgcggg
Cell: Read name and sequence
CRFK:b7c5b596-3c70-45bb-b00c-988c08291521 caaaatctta---cttggatcctaaagctgtagtgaaaatcc-ggttttatctgcgcggg
CRFK:4f28cb2e-0b77-4276-927b-22cf1cd859a9 caaaatctta---cttggatcctaaagctgtagtgaaaatcc-ggttttatctgcgcggg
CRFK:1a121a2d-cbd1-4954-953a-c59b730e8896 caaaatctta---cttggatcctaaagctgtagtgaaaatcc-ggttttatctgcgcggg
CRFK:5cc67035-40b4-4180-8075-baa2bb4be3e7 caaaatctta---cttggatcctaaagctgtagtgaaaatcc-ggttttatctgcgcggg
PG-4:1d375068-d36d-463b-a23b-b79a65e7211e caaaatctta---cttggatcctaaagctgtagtgaaaatcc-ggttttatctgcgcggg
PG-4:22777b42-f4c6-4e0d-994b-27b1798695bb caaaatctta---cttggatcctaaagctgtagtgaaaatcc-ggttttatctgcgcggg
PG-4:befbbc54-737b-4de1-802e-a01ed3fea542 caaaatctta---cttggatcctaaagctgtagtgaaaatcc-ggttttatctgcgcggg
PG-4:9baf3e20-d0e4-4767-94ac-af0d2ef545da caaaatctta---cttggatcctaaagctgtagtgaaaatcc-ggttttatctgcgcggg
PG-4:8bc2a176-7ea8-4825-a2f8-488be22f49bf tgaaatcttaattcttggatctgaaagctgtagtgaaaatccaagttttatctgcgcggg
PG-4:7ed64960-07a4-4574-8739-89a5ecb31ad5 caaaatctta---cttggatcctaaagctgtagtgaaaatcc-agttttatctgcgcggg
WT aacttaggtctgaaggtggagga
White spotted aacttaggtctgaaggtggagga
Cell: Read name and sequence
CRFK:b7c5b596-3c70-45bb-b00c-988c08291521 aacttaggtctgaaggtggagga
CRFK:4f28cb2e-0b77-4276-927b-22cf1cd859a9 aacttaggtctgaaggtggagga
CRFK:1a121a2d-cbd1-4954-953a-c59b730e8896 aacttaggtctgaaggtggagga
CRFK:5cc67035-40b4-4180-8075-baa2bb4be3e7 aacttaggtctgaaggtggagga
PG-4:1d375068-d36d-463b-a23b-b79a65e7211e aacttgcgtctgaaggtggagga
PG-4:22777b42-f4c6-4e0d-994b-27b1798695bb aacttaggtctgaaggtggagga
PG-4:befbbc54-737b-4de1-802e-a01ed3fea542 aacttaggtctgaaggtggagga
PG-4:9baf3e20-d0e4-4767-94ac-af0d2ef545da aacttaggtctgaaggtggagga
PG-4:8bc2a176-7ea8-4825-a2f8-488be22f49bf aacttaggtctgaaggtggagga
PG-4:7ed64960-07a4-4574-8739-89a5ecb31ad5 aacttaggtctgaaggtggagga
