# Supplementary material for: Whole-genome sequencing of CRFK and PG-4 cells to infer the phenotype of the original donor cats
Source: bioRxiv preprint, doi:10.1101/2025.10.31.685720, version 2 (2026-02-23)
Supplement: Supplementary Table S2 [file 685720_file03.xlsx]

## Sheet: Sheet1
Geneid	F.catus_Fca126_mat1.0.ENA.blood.1.bam	F.catus_Fca126_mat1.0.ENA.body_embryo.1.bam	F.catus_Fca126_mat1.0.ENA.brain.1.bam	F.catus_Fca126_mat1.0.ENA.cerebellum_brain.1.bam	F.catus_Fca126_mat1.0.ENA.ear_cartilage.1.bam	F.catus_Fca126_mat1.0.ENA.ear_tip.1.bam	F.catus_Fca126_mat1.0.ENA.embryo_fetus.1.bam	F.catus_Fca126_mat1.0.ENA.feline_primary_adipose_derived_msc_culture.1.bam	F.catus_Fca126_mat1.0.ENA.fibroblast_adult.1.bam	F.catus_Fca126_mat1.0.ENA.head_embryo.1.bam	F.catus_Fca126_mat1.0.ENA.heart.1.bam	F.catus_Fca126_mat1.0.ENA.hippocampus_brain.1.bam	F.catus_Fca126_mat1.0.ENA.iridiocorneal_angle.1.bam	F.catus_Fca126_mat1.0.ENA.kidney.1.bam	F.catus_Fca126_mat1.0.ENA.liver.1.bam	F.catus_Fca126_mat1.0.ENA.lung.1.bam	F.catus_Fca126_mat1.0.ENA.lynx_pardinus_rna.1.bam	F.catus_Fca126_mat1.0.ENA.muscle.1.bam	F.catus_Fca126_mat1.0.ENA.occipital_brain.1.bam	F.catus_Fca126_mat1.0.ENA.optic_nerve_head_glial.1.bam	F.catus_Fca126_mat1.0.ENA.ovarian_cortex.1.bam	F.catus_Fca126_mat1.0.ENA.ovarian_follicles.1.bam	F.catus_Fca126_mat1.0.ENA.ovarian_granulosa_cell.1.bam	F.catus_Fca126_mat1.0.ENA.pancreas.1.bam	F.catus_Fca126_mat1.0.ENA.parietal_lobe_brain.1.bam	F.catus_Fca126_mat1.0.ENA.pbmc_adult.1.bam	F.catus_Fca126_mat1.0.ENA.pbmc_kitten.1.bam	F.catus_Fca126_mat1.0.ENA.peripheral_blood.1.bam	F.catus_Fca126_mat1.0.ENA.retina.1.bam	F.catus_Fca126_mat1.0.ENA.seminiferous_tubules.1.bam	F.catus_Fca126_mat1.0.ENA.skin.1.bam	F.catus_Fca126_mat1.0.ENA.skin_orange_color.1.bam	F.catus_Fca126_mat1.0.ENA.skin_white_color.1.bam	F.catus_Fca126_mat1.0.ENA.small_instestine.1.bam	F.catus_Fca126_mat1.0.ENA.sorted_germ_cells.1.bam	F.catus_Fca126_mat1.0.ENA.spinal_cord.1.bam	F.catus_Fca126_mat1.0.ENA.spleen.1.bam	F.catus_Fca126_mat1.0.ENA.temperal_lobe_brain.1.bam	F.catus_Fca126_mat1.0.ENA.testes.1.bam	F.catus_Fca126_mat1.0.ENA.testis.1.bam	F.catus_Fca126_mat1.0.ENA.thymus.1.bam	F.catus_Fca126_mat1.0.ENA.tooth.1.bam	F.catus_Fca126_mat1.0.ENA.uterus.1.bam	F.catus_Fca126_mat1.0.ENA.whole_testes.1.bam
LOC102899061	0	2.13325	8.53906	21.6715	9.1324	22.8071	3.04872	0.034139	0	1.94129	0	8.38019	7.56322	1.01355	0.0740227	1.18827	0	0.0383814	18.7831	0.247668	90.3904	233.977	0.0412089	0	9.70342	0.214572	0.0436579	0.197006	0	0.858519	17.0327	45.3857	48.68	0.102274	1.56002	0.714579	1.92106	12.2494	1.584	1.37183	0.306697	2.45857	0.229186	1.58729
LOC101090826	0	0	0.0618796	0.0230563	0.219046	6.39375	0.0101512	0	0.0102162	0	0	0	0.0547126	0.0154485	0	0	0.0258782	0	0	0.0058015	0.23427	0.121065	0.0458516	0	0	0.186656	0	0.00580239	0	0.215968	2.68886	12.9855	12.9807	0.0577734	0.157431	0	0.242104	0	0.169196	0.244222	0.47775	3.54396	0.102003	0.145827
TRNAE-UUC	0	3.28404	9.53805	20.1768	10.1653	2.78463	1.00948	1.13322	0.406376	4.12416	3.60872	9.81797	22.6962	1.35191	0.655238	4.73328	2.23031	0.728027	24.3495	20.5963	7.6484	0	0.364775	0	8.13725	2.41737	1.73904	1.61564	8.60077	2.6433	5.79887	5.12433	2.23526	2.40256	4.81713	9.48802	4.68504	9.92413	2.24342	3.3262	0	5.18063	1.01436	2.32026
CCDC115	1.1323	57.6272	32.3928	80.2694	56.1104	46.0123	40.0558	20.4109	25.1753	54.1914	37.3844	63.5481	146.458	21.8963	11.7632	69.0262	39.9262	15.6564	46.3946	121.66	67.5697	132.879	35.3732	5.9234	59.6932	25.2112	18.6279	13.2649	64.1591	23.1073	51.8785	77.3828	68.6531	25.7358	25.6748	106.613	43.7755	56.766	25.7273	30.8946	86.7903	63.3237	66.5475	25.8111
IMP4	0.75764	52.342	42.3638	55.3739	34.826	42.4685	48.9021	60.1898	25.1102	59.2699	27.3398	49.1558	66.2122	76.9682	19.9018	38.9997	38.7616	17.4961	53.2399	38.6688	70.1991	240.334	113.627	4.09743	42.5304	14.87	9.99443	135.652	32.7774	32.204	37.6767	61.5972	53.5807	35.9421	29.1323	67.6913	32.4032	49.4691	34.4119	38.3864	58.3001	36.6513	39.4616	37.4984
LOC102899369	0.0279314	6.39085	3.67418	4.83195	10.4964	0.737852	3.82206	2.15564	1.00162	5.32605	1.97964	1.30491	4.30334	1.70673	0.324618	5.29527	0.2745	0.475552	1.79149	2.09276	9.06455	0.104467	0.640151	0.250987	1.2193	0.662612	0.309163	1.75237	0.660437	9.77013	1.46618	1.27149	1.27918	1.3506	16.6003	1.71889	1.90013	0.982961	12.1472	10.6197	1.57546	1.27281	4.85348	4.79963
PTPN18	0.316371	5.72798	5.76242	3.17084	10.9871	3.16598	5.02707	4.87023	4.54259	7.67285	3.0399	3.61937	10.8938	4.18245	1.03038	14.6524	1.77326	1.01134	1.18974	2.54205	7.56458	1.00171	1.17067	1.32626	1.85033	9.57846	5.39237	6.76912	1.19226	2.52035	3.31649	1.7955	3.60414	3.04146	1.7028	2.30458	19.8499	2.56437	1.1478	2.45566	13.2585	4.87207	5.47284	0.919312
LOC109493243	0	0.295564	2.43682	0.0825415	1.56837	0	0.436097	0	0.146295	0	0	0	0	0	0.122155	0.425996	0	0.471762	0	0.166155	0.11077	0	0	0	0	0.341885	0.208685	0	0	26.6147	0	0.092238	0	0	53.8025	0	0.562205	0	69.961	37.0942	0	0	0	34.3979
ATP12A	0	2.4276	0.735003	14.1489	5.32493	167.419	0.954488	0.0946544	0.196871	0.688954	1.11527	0.218683	2.51899	1.10868	0.00469113	0.368999	2.07499	0.0145943	0.147915	0.962811	4.4844	2.44025	0.0853116	0	0.0226559	0.17307	0.0581025	0.00128523	0.464843	6.98235	25.8218	151.082	136.86	0.0855061	19.0577	0.369835	0.626121	0.55262	14.438	12.5172	1.26986	2.50709	0.372796	5.72153
RNF17	0.00187656	1.18016	0.352947	0.80853	0.133679	0.216899	0.924975	0.271225	0.138123	0.97101	0.0511069	0.455752	0.336836	0.445577	0.0188905	0.212272	0.0793697	0.0515519	0.329166	0.499625	42.743	8.07415	0.162728	0.00604012	0.470565	0.13694	0.0738853	0.219547	0.888459	130.006	0.118624	0.141514	0.348215	0.0961581	366.837	0.526283	0.429431	0.109314	166.308	108.383	0.682446	0.25041	0.31604	70.7608
CENPJ	0.00163346	4.70309	2.92385	3.09815	0.707122	0.401201	2.38978	1.84593	0.789322	5.83631	0.361451	2.31051	1.23317	1.21811	0.121269	0.827831	0.318958	0.161321	1.45593	1.32297	1.70499	1.04621	2.1115	0.0145524	2.58825	0.329663	0.190262	1.04296	2.09712	6.7805	0.828038	1.46357	1.64182	0.756692	18.3185	2.16991	0.450606	1.38651	8.92024	6.05937	4.8663	0.798621	1.00974	4.5582
PARP4	0.0145557	15.1915	21.5145	13.7686	25.1956	7.05244	13.403	63.1326	38.8369	12.5088	11.14	15.738	17.75	14.1471	8.20884	38.0909	9.52177	5.91091	2.70179	27.0223	8.97791	3.75973	60.2211	0.428348	10.3623	13.7283	7.86769	1.54612	13.5234	21.2389	13.5736	19.3076	20.8164	22.3464	21.5543	25.3421	7.18282	7.90027	10.3538	12.1178	34.4943	13.8604	17.6921	11.6363
MPHOSPH8	0.160199	12.1032	16.3163	23.845	16.5119	3.52358	8.58844	6.90944	2.59252	14.795	6.8149	14.2486	23.462	4.65539	1.51498	9.54463	7.62561	2.42417	13.4196	17.1872	13.5508	8.81409	9.90438	0.347484	17.6214	3.75109	2.09102	5.87196	24.3792	19.0109	10.4768	11.2216	11.0094	6.01966	35.6644	9.59471	5.28864	11.8832	27.7182	21.6251	17.5125	5.85528	9.24697	16.6832
PSPC1	0.0489909	68.0212	39.8544	62.1761	32.7225	10.5603	40.3139	16.1964	9.94901	77.9764	15.8658	48.6712	61.6157	16.1943	5.01369	23.4825	15.9536	10.3829	41.6031	40.7867	32.9784	9.95662	20.4088	1.54994	58.3397	14.745	9.39524	33.171	49.2827	36.6937	25.1686	26.5738	28.3173	16.2163	73.552	30.8885	18.7789	47.3008	54.0055	45.892	87.0147	18.9591	32.8604	30.5934
ZMYM5	0.0230378	10.1974	7.1277	6.85261	6.74308	1.50753	6.43289	2.41795	1.86197	11.0637	3.43805	4.53342	12.8954	2.24388	0.834559	5.61003	4.3052	1.49175	7.32329	9.92162	7.43393	2.18818	4.67146	0.489868	4.46281	2.696	1.65925	1.52317	11.8029	12.5954	4.55467	6.26256	6.24962	2.52532	28.8452	6.24302	2.79187	3.08613	21.1593	11.6135	15.5877	5.76949	7.99637	9.69157
ZMYM2	0.0166817	58.8403	46.6695	37.4614	31.1297	7.54784	26.0317	14.526	18.8526	69.261	15.9974	33.0418	59.8159	9.09556	6.45167	22.2647	13.549	11.4351	20.1831	40.8976	28.7825	9.54948	32.3893	0.7552	27.9623	15.8465	10.3961	7.14883	51.5163	48.5531	21.4699	22.9033	25.3521	11.6683	100.484	23.4916	10.1922	24.6281	45.9259	42.1819	73.4131	20.5801	32.5525	25.9902
LOC123380274	0.00886658	1.09875	4.44705	1.31944	0.98776	0.0621106	0.472843	0.0303316	0.258328	2.96663	0.160984	2.33587	0.166433	0.116162	0.185307	0.316725	0.11193	0.779449	1.03685	1.08607	0.547085	0.0581821	0.122044	0.016308	1.6335	0.875799	0.232734	0.0334626	1.10025	6.24214	0.172457	0.0685784	0.119657	0.104847	12.0231	0.846515	0.161799	0.737853	4.0907	4.18292	0.363323	0.115366	1.05207	3.31073
LOC111558556	0	0.721558	1.6616	0.432889	0.323208	0.0315762	0.420677	0.0732459	0.134787	0.455966	0.0204605	0.612319	0.438028	0.0969865	0.00557254	0.134182	0.0690628	0.0198131	0.138056	0.599088	0.31028	0.00910124	0.214056	0	0.738177	0.104262	0.0197198	0.0310795	0.567959	2.77631	0.306862	0.0305063	0.0253467	0.0728474	5.30738	0.632087	0.115106	0.862764	3.75072	3.64399	0.184709	0.126841	0.34507	3.86108
GJA3	0.00326895	2.84576	0.015181	0.226257	0.322433	0.801469	0.0946358	0.128602	0.0501269	1.47528	51.1168	0.0538248	154.2	0.001516	0.00115463	1.0704	1.02849	0.0179606	0.491489	0.235554	0.925545	0.539569	0.00899907	0	0.033458	0.20234	0.286017	0.00806655	0.0249627	1.53653	1.16037	1.36532	0.459536	0.0231932	3.5949	0	0.532956	0.108813	6.24714	1.84728	0.0334877	0.487811	0.27527	1.13688
GJB2	0	2.6638	2.55446	3.08737	0.261314	30.9487	5.86593	0.0690182	0.0382501	1.76396	0.0199806	3.58472	9.87489	0.83307	5.52113	0.358163	10.3272	0.623985	5.50709	3.04673	2.34176	0.878779	0.0282754	0.00674693	6.29254	0.035373	0.00962864	0.0760361	0.460797	3.04414	10.6666	27.1848	25.9444	5.3999	9.78436	3.98156	0.138346	5.50696	6.69041	3.01063	2.43508	127.891	12.6029	2.56935
LOC123380387	0	0.0675574	0.493693	0.0754665	0	0.0763783	0.444403	0	0	0.339359	0	0	0.48608	0.18077	0.105908	0	0.0470572	0	0.364295	0.111561	0.3834	0.178869	0	0	0	0.12077	0.0476994	0.00949603	0.0416306	0.611734	0.159055	0.21083	0.12262	0.328777	0.792762	0.130121	0	0.272205	0.369203	0.363845	0	0.514992	0.166935	0.190925
GJB6	0	0.431907	16.2249	8.83373	0.139195	19.1927	3.30965	0	0	0.450465	0	15.3878	0.640371	0.00547918	0.0116847	0.014068	5.24848	0.00519311	20.2636	9.52612	0.213211	0.00134183	0	0	24.4208	0.0392595	0.0103373	0	0.214275	4.3882	2.94145	10.4266	15.4362	0.109905	9.46436	17.0961	0.0510568	21.237	3.57183	4.3101	0.314685	2.45237	8.94498	1.58114
LOC123380381	0	0.095755	11.0286	3.03959	0.0987992	7.05479	1.91126	0	0	0.0400836	0	6.08587	0.453265	0.00477801	0	0	2.24662	0.0113214	7.09976	5.98296	0.1538	0	0	0	8.98964	0.0436335	0	0	0.157351	16.1274	1.95383	8.78552	11.0797	0.0609156	31.2094	4.7184	0.252972	8.18794	22.7582	17.0353	0.527721	1.88772	6.42794	5.90926
LOC123380455	0	0.0362989	0.108826	0	0.0963075	0.153894	0.116042	0	0	0	0	0	0.0206189	0.0108675	0.00206926	0	1.37039	0.00643758	0.0489342	0.0255073	0.0388683	0.0044357	0	0	0.0599613	0.0839755	0.0256291	0	0.0447366	7.02661	0.0997043	0.509759	0.263537	0	17.2299	0	0.0517843	0.0975045	9.37318	8.41214	0	0.0135153	0	4.67093
LOC111556713	0	0.552456	0.414073	2.59196	1.4169	2.93557	0.145366	0.568857	0	0.346892	0.161886	4.20613	0.941436	0.0897293	1.57719	1.06167	0.35172	0.0489888	0	1.39873	0.118312	0	0	0	2.73777	0	0	0	0.340437	2.668	0	0.920656	0.200547	0.14058	19.7727	7.12932	0.175142	0	6.7441	3.0553	0	0.230165	4.09537	1.53268
CRYL1	852.017	26.7175	39.3334	31.8246	203.453	65.488	44.6989	170.093	121.376	24.8798	11.5341	64.7398	96.8376	423.155	49.9707	65.4664	54.3676	14.6899	68.9049	58.116	79.8824	132.422	55.2112	10.4113	42.3048	133.748	153.386	41.4668	32.5062	22.4122	77.4868	39.8357	38.8095	45.9153	36.7861	47.0006	71.7309	46.8624	25.8299	44.1482	49.1333	71.562	81.6907	34.3614
LOC109493944	0.485656	8.02436	4.31029	5.90116	10.3493	1.28521	1.97329	3.43351	1.73767	6.97001	0.489871	7.81884	5.74825	6.84687	0.213471	1.60632	5.04674	0.557386	11.3885	9.05957	2.2555	0.740876	0.950726	0.41685	8.17407	1.0618	0.519351	0.355609	4.2443	6.16271	2.04666	2.08683	2.48812	1.72712	14.9484	7.6634	0.826771	5.79282	7.30888	5.00542	3.09565	1.30517	3.55256	4.51454
IFT88	0.0166984	4.39719	4.3376	2.47101	5.27602	0.615275	3.03534	4.33966	3.06039	4.58657	0.460832	2.54875	4.03478	2.052	0.329347	1.79344	1.53374	0.248814	2.28093	4.30444	4.75343	5.97448	2.60137	0.125615	2.36196	1.43114	0.876612	1.12452	3.65836	6.48143	1.43069	1.45556	1.31641	0.932002	17.2014	1.81344	1.14408	1.82593	6.57877	6.25994	3.23305	1.41829	3.76074	4.05687
IL17D	0	0.769363	13.6233	7.56481	5.69851	0.579879	1.06423	6.29197	0.983766	0.32206	0.164388	12.0755	16.4126	1.03413	0.137058	1.13968	0.576093	1.51796	20.9451	0.851498	2.75638	0.242874	0.719263	0.0570957	13.6621	0.471938	0.181071	4.15151	6.96337	15.6878	4.00009	0.740305	0.669123	4.50692	22.6081	2.90198	0.315046	11.1081	10.621	7.17085	0	0.398279	0.871339	3.33695
EEF1AKMT1	0.286293	5.36774	7.81368	6.74343	5.23187	3.02369	3.74266	2.48752	1.52167	5.63111	1.24057	7.66656	9.37464	0.467746	0.408645	4.05813	1.74672	2.64116	9.52587	4.9848	3.78826	3.32803	2.63489	0.296712	8.00586	1.16928	0.667119	2.11411	7.60417	6.08122	3.82453	2.72373	3.19728	2.16415	10.9201	3.65832	2.81758	7.36342	7.00622	6.1908	5.06419	1.98255	5.67916	3.11041
LOC109494068	0.281467	3.21419	17.6349	15.7268	4.36704	0.95432	1.65562	1.26797	0.770372	2.76311	0.861635	11.4313	4.1635	0.311912	0.332355	3.04944	1.38357	1.65256	18.134	4.66497	2.70071	2.17243	1.85076	0.0902954	14.9904	0.895629	0.408063	1.84851	7.53216	3.68271	2.46676	1.98715	2.31884	1.62031	7.79929	5.93693	1.36935	12.2017	3.33858	3.32984	4.82802	0.902345	3.80829	1.49166
XPO4	0.068111	5.94953	4.11199	4.01965	3.39558	2.00871	3.43173	3.54664	2.22141	5.96776	1.55069	2.35914	5.98021	3.13792	1.37575	3.71195	2.94895	5.6788	3.32019	5.03589	3.83892	2.08156	5.05527	0.115541	2.18063	2.12094	1.39595	3.18594	4.47225	7.46778	3.58738	3.35335	3.26341	3.15698	11.7446	2.44086	1.61009	1.70448	4.92418	6.11296	7.26253	3.04482	2.90936	4.39427
LATS2	0.01121	11.7213	3.55279	9.96309	17.6474	6.61147	17.8666	19.8169	15.5415	10.6078	13.4477	15.74	14.7556	16.3671	1.72255	20.0545	6.20716	2.53077	3.69828	7.0088	4.59284	0.19308	9.19016	0.127497	2.62955	1.72731	1.09191	2.63485	10.0828	17.5835	15.4696	7.22916	7.48953	2.46695	24.8727	7.59142	3.75414	2.36454	23.9896	13.1043	12.4634	5.54511	8.34335	9.92881
LOC109494173	0	5.28791	1.77702	5.83258	10.9906	2.55247	5.17197	10.3489	1.96632	5.23558	3.57131	6.07042	9.14224	4.25695	0.56796	6.88555	5.80607	0.871664	3.22014	3.74251	3.01082	0.219191	0.750098	0.205603	2.13424	0.633095	0.197494	1.44288	6.3119	38.421	5.22656	2.78501	4.2066	0.89395	50.6495	3.27099	2.19578	1.10914	130.89	37.6064	15.1952	1.6037	7.20796	37.7516
LOC123380672	0	0.0391994	0.0930382	0.145962	0.138671	0	0.00642642	0.0288566	0.0129351	0.0656364	0.114866	0.156254	0.106384	0.0586796	0.0208564	0.0502205	0.068261	0.0278079	0	0.0303001	0.0354542	0.00336375	0.0116109	0	0	0.19786	0	0.00244887	0	1.4847	0	0	0	0	4.01726	0.0755015	0.0165695	0	1.49065	2.51601	0	0.00476266	0.0645748	1.32733
LOC123380853	0	0	0	0.0441398	0	0	0.22349	0.0545402	0.00977911	0	0	0	0	0	0.00675761	0	0.311015	0	0	0	0.165013	0.173828	0	0.0234591	0	0.166206	0	0	0	11.8153	0	0	0	0	26.453	0	0.175376	0	18.7062	11.9364	0	0	0	7.02904
SAP18	6.68051	64.0413	24.7217	35.6	28.4194	39.5534	68.7782	45.8867	32.3817	60.58	26.4182	42.2541	78.4288	71.1134	11.7441	36.618	33.8242	19.9667	35.2994	40.1917	68.5242	103.859	42.2121	5.12062	40.6821	16.3456	11.5424	65.0923	36.1184	100.839	29.5031	33.4404	33.2502	48.0378	156.342	38.7456	43.0283	31.081	170.353	101.393	64.2868	37.5937	43.4495	82.6712
SKA3	2.66905	27.3759	18.4398	34.1886	11.2476	9.66812	18.3042	14.2969	7.47809	25.053	14.4987	22.418	27.3637	18.3522	4.14402	17.1059	9.1393	12.4522	26.9758	23.8577	25.3423	38.6588	20.2525	2.59808	25.9314	9.24324	6.8624	19.8377	28.9214	22.2843	15.4414	11.791	13.8821	17.3466	39.0299	24.4664	17.078	21.5412	37.4232	22.2078	34.2909	13.0601	13.5938	20.7119
ZDHHC20	0.137822	10.5608	14.369	8.08157	9.93404	2.61288	5.35763	11.5336	11.3375	11.0852	2.51422	5.95937	10.7215	4.74369	0.927282	7.8248	5.56527	1.56365	4.14088	19.9556	6.38838	0.615418	9.43052	0.186069	4.80683	8.25463	5.78153	3.73219	5.7235	9.14252	9.6289	10.895	12.3943	8.00246	17.4931	19.5442	4.47416	4.05285	10.6838	8.0058	16.6097	10.4961	7.27243	7.23798
LOC109494403	0.0452153	16.179	26.1163	6.57202	13.6479	0.554286	3.10021	3.1451	1.66402	15.7734	2.9075	6.01797	4.43815	0.919137	1.448	8.86089	3.61664	1.91288	1.55266	16.2283	10.642	0.0989005	1.91896	0.0138605	3.08521	3.58432	2.10993	1.54892	6.35886	10.0251	11.4328	12.9687	12.5429	6.56755	18.7115	12.6807	3.00494	2.38304	7.8626	13.1299	11.5413	6.99067	8.48026	7.23571
LOC123380859	0	0.315605	0.958027	0.370181	0.0697796	0.107044	0.124178	0	0.0156215	0	0	0.503217	0.38245	0.0519689	0.00719657	0.0606507	0.0747438	0	2.18405	0.184074	0.0811068	0.303391	0.0140223	0.00936861	1.09481	0.318604	0.534804	0.195193	0.175035	10.1992	0.0495365	0.0393969	0.171851	0.0562171	22.5729	0.790246	0.260141	0.423882	22.6378	10.7861	0.104361	0.0581365	0	11.1541
MICU2	4.16296	97.0429	48.848	64.039	127.667	40.457	71.2378	69.0218	54.6389	81.3124	156.187	67.7791	196.902	68.8173	30.4943	115.645	86.6115	41.6447	40.2188	161.768	109.734	101.667	80.3244	14.2846	75.8537	39.849	27.0408	55.1767	86.8639	131.855	118.528	111.255	121.968	95.5837	255.108	134.487	80.1583	50.5131	346.074	147.721	140.989	105.745	108.067	126.83
LOC109494431	0.155822	0.872338	0.884445	0.442875	0.411118	0.123162	0.476072	0.105141	0.0590664	1.44952	0.0645755	0.495015	0.395215	0.15212	0.12335	0.599285	0.169111	0.0870143	0.227201	0.274182	0.280582	0.0596508	0.10179	0.0104913	0.468427	0.342793	0.192585	0.18944	0.838876	0.985603	0.435299	0.911947	1.08449	0.627953	2.60598	0.190604	0.272597	0.362989	0.769297	1.00255	0.764449	0.20077	1.27915	0.367148
FGF9	0.0736329	12.7991	32.2127	51.8424	9.98904	2.85781	7.67763	0.748864	0.427229	12.6047	2.14987	23.4779	9.17076	4.10603	0.216499	5.88847	3.70223	1.48703	55.1543	12.0682	3.89368	6.03267	1.019	0.208636	33.0379	0.752052	0.296007	2.99904	38.2504	1.97007	2.20633	2.42428	3.64803	2.89766	4.05869	32.1334	1.61836	24.9076	3.462	2.87917	7.05381	1.99204	25.99	1.95727
LOC123380866	0	0.230459	0.28069	0.19308	0.101908	0.130275	0.0708409	0	0.0142588	0	0.337658	0.727257	0.349088	1.02849	0.0426972	5.03776	0.130428	0.183923	0.20712	0.123483	0.283788	2.54866	0	0	1.95104	0.145406	0	0	0.213022	9.39066	0	0	0.104574	0.0733045	7.43697	0.110971	0.0913263	0.464287	11.7681	8.76056	0	0.0316133	0.142367	6.2326
LOC123382191	0	0	0	0	0	0	0	0	0	0	0	0	0.202582	0.370372	0	0	0.0652093	0	0	0	0.22913	0.261486	0	0	0	0	0	0	0	0.322937	0	0	0	0.850797	0.313876	0	0	0	0.365444	0.266612	0	0.251598	1.32188	0.0839915
LOC111556740	0	0	0	0	0	0	0	0	0	0	0	0	0	0	0	0	0	0	0	0	0	0	0	0	0	0.232377	0	0	0	0	0	0	0	0	0	0	0	0	0	0	0	0	0	0
LOC123380876	0	0.470269	0.801875	0.735453	4.57492	0.0531671	0.208161	0.752958	0.197854	0.177171	0.172254	0.531123	0.240414	0.281587	0	0	0.0474971	0.162633	1.9019	1.35984	0.37515	0.0344799	0	0	0.543778	0.0840681	0	0	2.15895	0.208183	0.0369061	0.0880553	0.042678	0.0149583	0.248329	0.679333	0	0.347384	0.224877	0.316024	0	0.139156	4.79341	0.239964
LOC123382251	0	0	0	0	0.244866	0	0	0	0	0	0	0	0	0	0	0	0	0	0	0.116736	0.0296474	0.349617	0	0	0	0.116461	0	0	0	2.11711	0	0	0	0	4.54863	0	0	0	1.32399	4.02393	0	0	0	0.891156
LOC109492527	0	0	0	0	0	0.098474	0.0142795	0	0	0	0	0	0	0	0	0	0	0	0	0.00408042	0.0186534	0	0	0	0	0.0610618	0.0204995	0	0	3.28335	0	0.0362428	0	0	1.19245	0	0.0184088	0	2.95523	1.05116	0	0	0	1.559
LOC109492533	0	0	0	0.0421803	0	0	0	0	0	0	0	0	0	0.00282621	0	2.26762	0	0	0	0.00265338	0.00606488	0.0353756	0	0	0	0.0595602	0.0533209	0	0	4.94637	0	0	0.0342678	0.0240212	3.1349	0	0.0119707	0	3.4049	1.91404	0	0.0207188	15.0453	2.14315
LOC123380895	0	0	0	0	0	0	0	0	0	0	0	0	0	0	0	0	0	0	0	0	0.0106831	0.00812775	0	0	0	0.141633	0.140884	0	0	1.01382	0	0.0622704	0	0	4.59518	0	0	0	1.84017	1.15324	0	0	0	0.851743
LOC123380892	0	0	0	0	0	0	0	0	0	0	0	0	0	0	0	0	0	0	0	0	0	0	0	0	0	0.035952	0.0482787	0	0	2.08452	0	0	0	0.00869988	4.64384	0	0.0216774	0	1.28455	1.4027	0	0	0	0.656223
LOC109492534	0	0	0	0	0	0	0	0	0.00843201	0	0	0	0.0258043	0	0	0	0.0047464	0	0	0.00239416	0	0.0111025	0	0	0	0.121814	0	0	0.0419905	2.92058	0	0	0	0	4.35791	0	0.043205	0	5.19025	2.042	0	0	0	1.79737
LOC123380919	0	0.193074	1.02504	0.0179731	0.398424	0	0.0079132	0	0	0	0	0.384809	0.536174	0.0144511	0	0	0.00896571	0.14838	0.433802	0.287176	0.0758049	0.0838879	0	0	0.318934	0.0609089	0	0	0.198295	0.89357	0.252537	0.0803379	0.233625	0	0.962901	0	0	0.172875	0.461629	0.627008	0	0.0529699	0	0.24251
SGCG	0.00194188	3.0561	8.4071	0.426736	4.02227	0.401285	0.849174	0.00249111	0.0178663	2.32692	13.314	2.85367	14.1542	0.209154	0.032237	1.13876	4.73517	15.5413	18.5234	2.90678	1.08641	1.96186	0.412961	0.00357163	8.22835	0.0328961	0	0.00746961	2.97687	2.43804	20.2966	0.777255	1.57237	0.182936	5.34228	4.85506	0.135411	2.66636	2.83772	2.42721	0	3.70886	0.148655	1.99865
SACS	0.00123083	7.09472	28.5945	13.3192	2.17581	0.468607	3.56175	6.61131	2.15823	8.11189	1.45872	23.4926	2.8383	2.63721	0.236153	2.08477	1.37979	3.69669	20.2287	3.65548	1.93177	0.136061	8.61777	0.00452766	23.9116	2.02814	1.20399	7.23727	5.31749	2.5606	1.38553	0.762541	1.09767	0.600135	6.53914	11.1621	1.53452	18.7697	2.1873	2.08675	8.55261	0.983906	1.50097	1.03692
LOC123381086	0	0.133891	0.150529	0	0.236824	5.18451	0.197552	0	0	0	3.58011	0	0.55773	0.080171	0	0	0.214502	0	0	0.0611555	0.172042	0.818068	0	0	0	0.0703974	0	0	0	0.161651	1.73375	5.68261	5.3464	0	0.235674	0	0.0424465	0	0.0457322	0.249693	0	0.0629708	0.66169	0.241749
TNFRSF19	0.00729337	8.44687	2.79677	2.43975	0.905673	2.76506	3.07429	0.46942	0.0548369	7.07181	1.50361	2.93636	4.73667	0.490495	0.0329492	4.06761	2.23495	0.457079	2.23832	5.78805	10.2607	2.71032	0.00680057	0.0242326	2.52961	0.134589	0.230551	0.0178949	13.7668	1.26132	2.24913	6.09051	4.52443	0.16034	2.29135	2.05947	0.343831	2.27797	1.33589	1.98004	1.42922	2.73196	2.32605	1.35207
MIPEP	0.00428168	4.53984	7.61735	2.15411	2.37615	1.50904	2.6169	1.96547	0.722056	4.72088	2.66257	3.8158	3.55867	1.96486	1.13263	2.40892	2.12699	1.18494	1.53964	2.79793	3.98632	3.12911	2.11105	0.121671	3.8444	0.746534	0.584415	1.70864	3.61906	5.92847	2.66807	3.88706	3.30083	2.03815	14.6741	1.84463	1.08158	3.30032	3.93947	6.01041	1.90582	1.85494	2.63283	2.6916
LOC111559532	0.069301	0.590412	0.442521	0.344756	0.498422	0.313523	0.290379	0.0666764	0.0343157	0.224682	0.11796	0.439788	0.499671	0.255102	0.185369	0.498542	0.169486	0.034903	0.289429	0.469259	1.21316	0.72986	0.0457073	0.0132774	0.398982	0.0620857	0.050529	0.0687389	0.661504	0.570621	0.709063	0.429923	0.576405	0.278852	0.955261	0.146456	0.294942	0.492602	0.213885	0.690896	0.739513	0.177757	1.06103	0.31391
LOC101095540	0	1.14817	1.84888	0.576162	9.82114	2.56574	0.538227	0.0396198	0.0177597	0.743474	19.3524	1.54942	2.92129	0.439758	0.520554	1.49971	1.90755	2.88259	0.483699	1.05517	4.22237	1.21671	0.121555	0.138462	1.09649	0.22261	0.126668	0.120201	0.873359	2.27067	16.9514	4.68048	5.22623	1.81464	2.07889	1.33898	0.639838	0.33733	1.32358	2.68749	2.72884	5.72275	3.39126	1.04359
SPATA13	0.0040156	1.15408	2.43487	1.76088	2.85718	0.908795	0.773046	0.771382	0.158203	0.97943	0.939042	4.61304	5.26854	1.73333	4.03893	4.23798	2.18695	0.209088	1.81812	2.0941	2.03124	0.115925	2.22376	0.148567	2.83826	0.682269	0.422288	0.788393	2.21962	4.36862	1.69501	1.01358	1.04475	1.28997	6.68097	6.28751	1.4779	3.20929	3.26108	3.44356	2.7514	1.61254	2.62001	1.89792
LOC123381459	0	0.958585	9.13058	1.11543	4.38012	0	0.648252	0.0882077	0.138388	3.51111	1.63855	3.60877	0.151252	0.251117	11.9514	6.98479	0.653793	0.425011	0.502546	0.342414	1.00078	0.846	0.0354916	0.0237127	0.791733	0.554408	0	0.172169	0.541479	8.68002	2.44493	0.847592	1.73988	0.579324	23.5753	3.38492	0.861034	0.536439	9.76797	9.81677	3.30182	0.203503	4.83604	2.72161
LOC109494916	0	0.270849	2.50795	0.109257	1.1378	0.0255178	0.12766	0.00415386	0	0.217309	0.187394	0.439853	0	0.0591277	4.16238	0.368687	0.321246	0.280203	0.148756	0.105737	0.0636435	0	0.00835681	0	0.12428	0.362348	0.185923	0.0114566	0.185449	4.38733	0.395596	0.216008	0.177523	0.112476	8.78671	0.760781	0.259982	0.262723	20.9257	4.40372	0.422929	0.0163653	0.780815	7.46076
LOC109494931	0	0.216977	0.127053	0.0984666	0.10794	0.0383293	0.040018	0	0	0.459816	0	0.162169	0.0410833	0.0872911	0.0803988	0.0390911	0.0613989	0	0	0.0743294	0.0595362	0.00441908	0	0.00805112	0.0560031	0.0114083	0	0.000635392	0.133707	3.74937	0.0319277	0.059249	0.172298	0.0138032	8.50573	0.652995	0.0515902	0.109282	8.98603	3.4037	0.313897	0.00318899	0.38536	2.61249
LOC109494958	0	1.53747	2.82633	1.05507	2.20446	0	0.846976	0.0597924	0.00351503	0.686699	0.0104048	2.32121	2.85732	0.0457114	0.0111328	0	0.0717249	0.0465994	0.650995	2.92203	0.979037	0.0410757	0.0433839	0	2.36375	0.0425658	0.0225632	0.00465827	2.74383	0.698772	0.0557316	0.0265943	0.0322238	0.00813184	2.23333	5.89867	0	2.44169	0.899901	1.26248	0	0.0645721	0.0526435	0.143832
LOC111559449	0	1.04795	4.55836	1.09201	1.62305	0.0117889	0.482073	0.0676456	0	0.549984	0	2.3692	2.03359	0.121752	0.00980801	0.0200386	0.217896	0.0277393	0.576339	2.02198	0.585629	0.0942921	0.0891829	0	1.83443	0.0646939	0.0110435	0.0170998	1.89234	0.761656	0.0490996	0.0260329	0.0851678	0.00530679	2.94279	3.70048	0	1.27443	0.658898	1.18286	0.0172401	0.0457721	0.0515322	0.124424
LOC123381472	0	18.9682	1.38188	1.273	24.7116	10.7246	7.90075	10.0814	3.12187	6.47679	72.4795	1.91453	5.22861	12.3201	5.13517	54.7957	0	7.82758	4.78189	7.7648	79.9179	44.3788	4.62819	1.45074	2.56342	6.1242	3.34706	21.0817	3.64377	61.4006	39.5434	10.0965	21.2147	6.70268	33.4262	8.26889	18.3152	1.64161	71.9306	64.0313	397.385	9.46381	27.9671	49.6777
AMER2	0	11.0682	75.7057	133.278	4.2987	1.23125	2.96003	0.262664	0.181575	15.0442	0.201553	77.6222	60.1969	0.250116	0.0117631	0.121166	4.56746	0.024397	59.0684	69.6728	0.684957	0.12774	0.00509334	0.0170148	73.3323	0.137426	0.0242821	0.58063	111.986	1.96767	0.566786	0.543786	0.905114	0.147314	5.8282	71.4955	0.341622	73.4345	2.37677	1.58028	0.0947677	0.96217	2.57776	0.916137
LOC109495032	0.000753381	0	0.0651633	0.057359	0.0330265	0.00263873	0.00114791	0	0.000577626	0	0	0.0372143	3.15844	0.00104816	6.65257e-05	0	0.000812869	0.00041393	0.054538	6.52619	0	0	0	0	0.00385545	0.033379	0.00329585	0.000948122	17.2152	0.0366327	0	0.00291351	0	0	0.0739487	0.0202295	0.00591942	0	0.0255105	0.0488923	0	0	0	0.0155118
LOC109495042	0	0	0.084428	0.120197	0.249797	0.00760308	0.0165376	0	0	0	0	0.125098	0.336161	0.0130871	0	0.0129236	0.0262321	0	0.410988	0.167762	0.00936135	0.00109572	0	0	0.644315	0.043845	0	0.0660122	0.0787382	0.45333	0.0105554	0.0167896	0	0.00513382	0.899636	0.0647647	0.0511676	0.650318	1.29552	0.804168	0	0.00443593	0	0.719393
MTMR6	0.0276119	8.36517	16.9778	12.6996	8.12007	1.80766	4.50375	6.34615	8.44151	8.19084	7.61432	28.6158	7.45535	5.29567	1.78405	4.94587	7.30593	5.4334	14.5292	14.4832	6.21708	5.63199	9.61373	0.201575	17.9545	2.41785	1.48682	4.60633	5.76592	17.1344	6.13143	6.03912	6.34278	3.34654	39.3554	22.1757	2.49293	17.1994	15.5152	14.3555	5.86676	7.26051	3.74734	10.2494
NUP58	0.0267936	30.4131	9.51885	12.5543	6.90061	4.3906	16.4451	11.7061	7.16363	41.8902	5.31209	13.2075	12.1514	6.45116	1.65887	7.06432	4.36158	2.54361	7.06841	9.411	15.5996	17.3882	17.2256	0.179522	12.3993	4.18854	2.81735	15.4954	11.1272	24.7549	7.74269	9.14793	10.0836	4.60994	62.283	10.8089	5.53558	13.9435	45.5173	22.9633	26.8989	5.96977	12.8121	16.5625
LOC111559502	0	3.27599	5.38883	8.22581	2.25627	0	1.27614	0	0.0143497	0.946594	0	8.1664	1.96516	0.0173593	0.00826335	0	0.183763	0	10.1745	0.980917	2.89944	1.52808	0.0128807	0.00860589	6.41722	0.231694	0.245632	0.0054334	8.36977	1.86677	0	0	0	0.114346	5.67708	2.23357	0.165435	3.89372	3.33054	2.30353	0.62312	0.0443135	0.107456	1.27677
LOC123381727	0	0.642094	2.80483	1.78195	0.780812	0	0.197373	0	0.0099318	0.151191	0	1.25307	0.31154	0.00600738	0.00686312	0.212082	0.0670876	0	0.468867	0.326641	0.283612	0.0277891	0	0.0119127	0.828641	0.160361	0	0	1.14993	4.51406	0	0	0.0182099	0.0178708	9.66165	0.772955	0.0318061	0.592887	6.39224	4.18976	0.132701	0.00157285	0.297491	1.3536
ATP8A2	0	1.12968	9.82766	4.95543	1.02147	0.193008	0.415441	0	0.00127004	0.749291	0.010777	8.75017	2.16294	0.0674226	0.00247024	0.770216	0.556725	0.180143	5.72114	3.95899	4.59705	3.61107	0.00243206	0.00355449	9.60963	0.0162612	0.00676356	0.000577069	10.2296	3.93034	0.247012	0.421729	0.32259	0.15901	8.72958	6.95062	0.119198	10.7512	6.45051	3.43843	0.659539	0.120852	0.129766	1.63791
LOC123381750	0	0.180222	8.69327	1.17916	0.341543	0	0.139288	0	0	0	0	0.478925	0.146245	0	0.00587072	0	0.00717335	0	0.462772	0.334083	0.617533	1.21022	0	0	0.680467	0.129953	0	0	4.60095	1.9755	0	0	0	0.0131029	6.62639	0.396712	0.0489725	1.7981	1.07285	3.18547	0	0	0	0.334134
LOC109495412	0	2.73354	2.20533	0.296874	0.470074	0	0.354778	0	0.00939598	0.476781	0.0556257	0.302674	0.172526	0.0966159	0.0173143	0.0729601	0.0634683	1.08405	0.204726	0.0747003	0.103666	0.00618586	0	0	0.250859	0.191633	0.080418	0	1.73127	0.290304	0.387336	0.071089	0.0689097	0.284998	1.18061	0.0731254	0	0	0.051871	0.229498	0.627707	0.363814	0	0.0298043
LOC111559455	0	0.764719	5.73167	1.32408	0.473418	0	0.188054	0	0	2.4969	0	0.508045	0	0	0.00871874	0.0734792	0	0.0949355	0.137455	0.209574	0.065508	0.0373792	0	0	0	0.16083	0	0	8.19956	7.84782	0	0.0477299	0.347	0	18.5755	0	0.14546	0.308123	15.0451	6.05366	2.02295	0	0	4.56249
SHISA2	0	87.7061	9.58125	4.713	106.251	41.4259	63.5481	0.443091	0.309275	64.3004	3.7375	22.7588	98.2112	0.731972	0.335934	127.083	19.412	49.5287	23.3175	22.3484	8.18713	1.62422	0.142627	0.112309	12.954	0.192897	0.210466	0.347015	59.6457	8.59584	49.5401	52.4733	54.7699	21.4078	17.8462	3.57733	6.38968	17.3691	16.4314	9.0146	17.8181	5.54397	1.68562	7.1516
LOC101096779	0.000171772	0.237587	0.848338	0.232993	0.395415	0.0199037	0.129204	0.00552268	0.00613938	0.278368	0.0228629	0.0861249	0.170155	0.00637881	0.00215818	0.14494	0.0938938	0.017046	0.164694	0.0696717	0.269546	0.12696	0.00195547	0.00225667	0.150033	0.0138375	0.00847508	0.000318698	0.256423	1.54889	0.0536947	0.0407061	0.0312277	0.0202611	3.86038	0.0712854	0.0119235	0.116548	1.3117	1.28857	0.0449838	0.0161834	0.060804	0.508844
LOC123381865	0	1.94343	3.94503	0.49751	3.58075	0	0.438088	0	0	1.83045	0.474571	0.430377	0.0766618	0	0.0323131	0.933689	0.0620446	0.0861665	1.16441	0.236145	0.815059	0.128638	0	0	0.802578	0	0	0	0.349298	5.11641	0	0.35379	0	0.0412112	10.7613	1.32572	0.0513429	0	5.08918	3.44987	1.33882	0.0190422	0.60028	2.33934
LOC123381855	0	4.44581	2.68258	1.00997	6.33065	0.330919	1.66591	0.0125692	0.0144879	5.37483	0.324022	0.458057	1.17616	0.0294541	0.0224332	2.55935	0.46485	0.0738281	0.876864	0.500722	0.952103	0.232359	0	0.0376512	1.24638	0.0328315	0.059703	0.000457143	1.47703	1.96851	0.290965	0.71249	0.761484	0.297929	4.88498	1.30606	0.144345	0.987171	1.77291	1.98518	0.33338	0.122621	0.180817	0.876737
RNF6	0.023147	3.14328	23.4574	28.5741	5.09471	3.31216	3.03825	3.89154	3.24772	2.69413	5.04972	15.9358	9.32681	3.92237	1.15943	4.92373	6.78744	3.22711	38.5531	8.212	7.36504	4.85805	6.73587	0.264754	18.3409	2.03726	1.56746	4.40193	14.6617	65.4859	6.63365	6.81062	6.63888	4.89796	148.605	15.2938	2.4865	12.8937	103.408	53.5026	11.3111	4.74802	4.7732	49.08
CDK8	0.000863505	7.78803	4.04972	4.25613	2.28426	1.97571	4.11717	3.95351	2.53437	8.79852	3.22085	4.06102	3.68039	2.29431	0.719877	3.23749	2.12481	0.882212	3.753	3.45166	3.12189	0.698043	3.90385	0.120109	4.52507	1.04591	0.760245	3.12068	4.41137	4.45686	2.81113	2.93532	3.53361	2.50313	8.47868	3.04903	1.44768	4.60794	7.28703	5.57925	5.32966	2.2811	3.70839	3.68878
LOC109495641	0	2.43504	6.96998	3.76752	0.693092	0.0949304	0.777761	0.169984	0.228587	2.15112	2.15293	2.7892	0.254378	0.22206	1.15518	0.672342	0.367008	2.75492	2.16329	0.431121	0.236765	0.00456031	0.0373065	0.0332337	2.58913	0.782898	0.316189	0.203791	1.10384	4.68021	0.636997	0.908404	1.49864	0.135322	10.0229	2.39896	0.257322	3.19527	2.98273	2.76944	2.40633	0.105309	0.795352	0.975566
LOC123381963	0	4.84176	9.14426	8.19719	2.12839	0.530332	1.96001	1.35349	1.19928	7.41733	2.44432	7.42513	2.91323	1.17541	0.918485	2.06159	1.93885	2.23243	4.16447	3.11913	1.50687	0.259194	1.50783	0.0932342	6.22591	1.352	1.16928	1.29278	3.38831	6.87327	1.6774	1.96544	1.88791	1.2305	11.6584	4.97316	0.879334	9.10511	3.55554	4.25376	6.23145	1.27574	1.67315	2.69107
LOC123381975	0	0.105984	0.168803	0.059196	0.140598	1.03347	0.09122	0.351091	0.0262296	0	0.116462	0.422468	0	0.0277643	0.0181253	3.33515	0.0498308	0.0563887	0.190502	0.0670279	0.00567433	0.0366951	0.129494	0	0	0.0947321	0.0187077	0	0.163276	3.55086	0.249526	0.281138	0.28855	0.104506	5.81424	0.40827	0.0335996	0	4.05444	3.12663	0	0.00623075	0.065472	2.95363
WASF3	0	5.61043	10.3234	22.0754	2.93961	0.222628	2.63014	1.46011	0.26223	6.40284	2.547	14.647	6.82727	0.731431	0.389444	5.27744	2.03759	0.230131	28.5012	9.96786	3.75219	0.198023	1.36459	0.0746833	19.2692	0.0126176	0.00956502	0.00489654	30.5402	2.93705	0.615873	0.308623	0.318774	0.678801	4.72312	12.8247	0.349409	20.6459	3.29324	4.29753	0.0847927	0.522095	2.08621	3.02486
LOC111556724	0	0.552456	1.86333	2.15996	0	0	0.407567	0	0	0	0	0	0	0.0413499	0.314934	0	0	0	0.993015	0	0.177469	0	0	0	0	0	0	0	0	1.55633	0	0	0	0	2.59315	0	0	0.741991	0	0.817116	0	0	0	0.607172
LOC109495851	0	0.417758	11.8592	3.44166	0.554193	0	0.43661	0.0576623	0	0.918098	0.30604	0.83262	0.19775	0.0859873	0.583463	2.40846	0.0800222	0.185223	0.938627	2.30444	0.648628	0	0	0.0310025	0.862606	0.08786	0	0	11.7776	9.41499	0.163926	0	0	0.212609	12.8684	0.20116	0.264878	3.36649	25.2563	11.3571	0	0.0204665	0.516142	16.3976
LOC123382387	0	0	0.122017	0.161648	0	0	0	0	0	0.363451	0	0.144205	0.0273993	0	0.00412459	0	0.0125995	0	0.130052	0.0660959	0	0	0	0	0	0.167386	0	0	0.178344	1.57239	0	0	0	0	3.96927	0	0	0	1.53223	1.83554	0	0	0	1.74375
GPR12	0	7.53965	41.3539	82.6895	0.255643	0	1.41574	0	0	6.95762	0.0352931	198.184	3.01936	0.259625	0.311713	0	5.32222	0	109.976	10.6538	0.0103174	0	0	0	160.557	0.0253305	0.0680309	0.00225727	40.5682	0.077554	0	0	0	0.00919443	0.0565335	27.397	0.519287	160.857	0.0658216	0.0573148	0	0.0472046	0	0.0264741
LOC123382102	0	0	0.323794	0	0.318386	0	0.141647	0.516783	0.712767	0	0	0.287005	0.136329	0.70597	0.008209	0.20755	0.10532	0	0.129418	0.0354167	0.131066	0	4.43062	0	0.297342	0.16657	0	0.0168677	0	0.144882	0.452044	0	0	0.054965	0.760414	0	0.091304	0.0967028	0.639415	0.761662	0.119043	0.158028	1.33436	0.118698
LOC123382099	0	0.0865487	0.178391	0.290043	0.306172	0	0.372459	0.0238923	0.374842	0	0.0634035	0	0.0655498	0.181383	0.027136	0.249485	0	0.092096	0.155567	0.221986	1.27428	0.310235	0.163428	0.0256917	1.14374	0.39135	0.183325	0.1764	0.0533335	2.33369	0.271689	0.324116	0.15709	0.1872	1.70116	0	0.164628	0	1.41897	2.63814	0.143095	0.0949787	0.320794	1.78691
USP12	0.131556	13.9689	17.5804	19.6601	9.59092	6.28236	9.79966	9.87386	13.4393	15.2669	7.98461	34.5466	20.7696	8.13628	2.51971	15.5392	14.1321	3.79247	38.0625	26.1912	32.2906	8.09306	55.7829	0.739726	35.9665	4.35435	3.92014	16.2963	29.9773	25.7664	12.4613	13.0591	12.0304	15.355	37.8959	20.9393	5.55811	33.1685	50.1945	23.9082	21.586	8.98434	10.8017	20.3887
LOC123382129	0	4.81965	6.31396	3.01406	7.43198	0.209575	1.77275	1.09169	0.856364	7.08722	3.28934	1.36836	0.764375	0.632063	1.41837	6.96634	1.33137	2.11864	0.81448	1.78023	1.69601	0	1.37267	0.0122282	1.29289	1.16958	0.959805	0.699657	9.97612	11.6047	6.01305	4.7051	3.40196	2.89311	18.5018	1.07112	0.914154	2.43435	19.3888	8.91268	4.56319	0.660329	3.81711	5.81602
LOC109496069	0	0.898809	0.240596	0.519946	0.681343	0.362916	0.311808	0.261414	0.206553	0.241873	0.282191	1.45017	0.413304	0.0720788	0.0475779	0.801947	0.199559	0.0284648	3.20229	0.405462	0.888531	0.311196	0.119446	0.102435	1.29913	0.761189	0.407964	0.332579	0.356059	1.2628	0.302303	0.300531	0.611768	0.178684	2.75922	0.077285	0.193355	1.20717	1.76525	1.79928	2.54751	0.342519	0.753542	1.02185
LOC111559476	0	0.318129	0.207943	0.673555	0.287894	0.359666	0.352043	0.15624	0.13	0.557458	0.0921374	1.11573	0.400637	0.0725409	0.0278356	0.227482	0.313064	0.0393627	1.00734	0.661292	0.526023	0.141939	0.124087	0.013177	1.09379	0.0949141	0.0679075	0.063089	1.38595	1.86238	0.333852	0.314002	0.258496	0.12237	3.67452	0.192373	0.233372	0.645876	1.90536	1.81076	0.12232	0.160204	0.676411	0.664426
LOC102901461	0.000916916	0.639794	0.341963	0.580934	0.262817	0.339926	0.558619	0.268306	0.614972	1.37204	0.0665909	1.18108	1.11145	0.169044	0.0928746	0.238512	0.339716	0.0706843	0.53651	1.00137	1.09229	0.511034	0.30892	0.0467018	1.24311	0.0602933	0.0617119	0.294446	1.02227	1.16078	0.332677	0.262399	0.292694	0.402675	4.09849	0.34006	0.267392	0.807641	2.01872	2.27165	0.745664	0.347698	1.37792	1.36598
RPL21	1500.6	2364.24	581.576	887.303	1420.08	2136.03	2081.96	1132.31	1000.83	2446.06	911.026	688.975	3803.93	1415.43	521.307	1651.16	925.321	792.613	938.287	2436.53	2563.6	1160.73	1438.25	279.498	711.013	982.994	719.869	1642.03	972.572	643.787	1880.22	2030.69	2040.17	1310.21	793.438	1136.15	2405.64	594.709	959.569	1014.09	3717.91	1966.25	2859.92	1499.03
LOC111557008	0	36.6333	16.5367	17.6709	27.2439	4.23577	43.9168	14.4797	9.4783	69.007	15.858	9.95625	20.8088	18.6325	6.54974	57.9994	29.1125	7.38281	16.4617	49.0859	83.5789	2.17045	14.1492	0.617866	11.6901	42.0243	33.5071	25.4732	32.8354	26.6377	40.1837	55.8624	44.5793	14.1946	81.3349	0.801805	30.7497	7.26837	5.40316	23.6648	92.2278	39.7446	52.4611	13.8562
LOC111557034	0	4.42182	14.5651	0.259973	6.79214	2.36803	6.98212	5.26815	7.94834	20.4584	2.55736	4.32918	5.72851	3.71026	46.5403	3.13068	4.36066	3.1781	1.04579	10.2866	33.3431	0.265432	3.36052	2.27978	3.0755	23.9344	22.8403	6.26993	4.30238	4.68301	6.02717	9.87745	3.5905	3.79013	12.699	1.34476	3.68901	3.75085	2.7027	13.4245	14.6216	8.40981	9.48868	3.61742
RASL11A	0	27.7545	8.97	13.2787	21.5014	33.7196	21.322	116.738	179.302	20.8722	14.737	33.8046	41.374	62.7373	6.38697	62.5362	59.0725	3.94923	38.2374	21.9146	56.904	32.22	979.324	3.97571	20.258	1.42535	0.873476	3.80673	9.14813	109.063	67.2859	36.8952	23.3329	13.5228	41.5948	12.8464	60.5346	20.8054	50.6698	74.2797	4.80222	28.316	203.153	36.8793
LOC123382207	0	0.112768	0.0507124	0.00839796	0	0	0.0480669	0.0456575	0.0632589	0.387082	0	0.549397	0.0512444	0.00562691	0	0	0.0115204	0	0	0.00845249	0.00965999	0.0202108	13.4626	0	0.0248371	0.0173921	0.00530802	0.00105672	0.0277961	0.683768	0.0117998	0	0	0.0114781	0.0176438	0.13756	0	0.201941	0.0924415	0.280884	0.161585	0.00942868	0	0.0295086
LOC123382227	0	0	0.037014	0	0	0.223328	0.133586	0.0136328	0	0	0	0.131234	0.308569	0.0887106	9.34928	0.284709	2.20151	0	0	0	0.0185079	0	0	0	0	0.088282	0.034868	0.0323939	0.0608635	0.0596232	0.310048	0.123292	0.0896345	4.34486	0.0869256	0	0.289635	0	0	0.0301696	0.0816491	0.735977	0	0.0077536
GTF3A	1.62013	86.5065	54.9702	63.718	65.8427	53.526	84.3696	71.5473	40.3428	76.9733	47.7803	74.9758	128.572	69.9088	38.5132	115.521	55.6441	27.6729	65.3227	100.92	164.803	56.348	67.6213	5.71093	80.8565	34.6926	23.3498	61.6118	91.7444	84.127	58.9363	53.0143	56.0341	99.5942	142.191	81.0879	78.6801	74.7698	157.451	116.66	200.086	72.8168	148.384	87.5914
LOC123382271	0	14.9538	9.2335	12.0519	10.6067	2.49624	7.96549	1.83548	0.763767	13.8639	5.80826	10.8348	4.45615	2.70987	4.24943	11.8613	1.14997	1.59301	5.95303	5.06892	8.12438	0.0286162	2.04559	0.148959	9.86417	2.92864	2.39155	4.49073	14.781	4.13997	5.47398	6.26404	7.85567	7.94562	6.92636	10.97	2.72034	11.9292	1.90253	4.53066	20.3682	3.71219	11.4697	2.03663
MTIF3	0.0463619	9.21319	6.46892	8.83321	7.82936	4.72388	8.62072	4.49268	2.9833	8.40208	13.7168	6.67601	14.8971	6.15114	3.0268	7.55285	7.69003	8.46987	8.27076	5.70047	12.6038	15.4438	6.58799	0.813184	7.69581	2.36605	1.54882	6.01581	11.5962	20.889	7.13613	6.58167	6.7354	6.52493	42.3628	5.89501	6.5718	6.34835	52.8978	26.6055	13.7646	6.57417	8.67271	20.5445
LOC109496316	0.00036316	6.43278	2.28176	4.07348	0.755036	1.13729	2.062	0.800209	0.396367	8.09502	0.489673	4.11537	1.11275	0.18625	0.692671	0.8394	0.374549	0.276996	2.66464	1.4054	1.57676	2.1256	0.857131	0.0392911	5.50986	0.222699	0.158873	0.673814	5.15489	5.02321	0.592093	0.710476	1.2853	0.744358	14.6235	1.60612	0.490953	4.72874	8.23274	5.69396	4.59564	1.05413	0.752254	4.28932
LOC123382282	0	0	0.159087	0	0.187716	0	0	0	0	0	0	0	0	0.0158867	0	0	0.0739229	0.0376431	0	0.0671182	0.0454557	0.00216144	0	0	0	0.982076	1.19891	8.14493	0	0.128131	0	0	0	0.162033	0.809485	0	2.79252	0	0	0.320762	0.526395	0.0374349	0	0.216614
LOC123382316	0	0.218397	0.163691	0	0.0643829	0.164608	0.143217	0	0	0.297122	0.213323	0.193458	0.124056	0	0.0591374	0.0174875	0.381579	0.0129108	0	0.012789	0.0409249	0	0.00808614	0	0	0.176072	0.0514002	0.0400784	0.134582	2.29254	0.171395	0.136312	0.0660668	0.129673	1.62311	0	0.161553	0	1.90221	2.33606	0.361086	0.0770365	0	0.525774
LOC123382321	0	0.720887	0.0900524	0	0.212516	0	0.236367	0	0.0594697	0.226326	0.35207	0.638567	0.090997	0	0.249995	0.634953	0.146456	0.170465	0	0.0168857	0.0450284	0.039152	0	0	0.19847	0.176881	0	0.0759972	0.444229	2.24841	0.0942906	0.0749902	0.654222	0.18344	1.83286	0	0.533256	0	0.369343	1.66889	0.794585	0.0517984	0.296886	0.282959
LNX2	0.0126573	7.59006	1.19428	2.27639	3.94043	4.78512	5.28728	3.16288	1.5879	8.14059	6.10789	3.90114	8.49378	2.43778	7.36872	6.5065	4.98505	1.86259	2.05281	4.16041	3.30044	1.02004	4.36804	1.34079	1.89464	1.55531	1.02209	2.51347	10.0642	4.86413	6.63745	8.26624	8.33385	10.9351	8.88653	1.96133	2.46139	1.39892	5.52429	4.08037	19.4495	6.37183	6.10434	3.47924
POLR1D	15.8874	198.553	27.3445	64.2991	98.0046	144.005	221.148	84.5633	49.9331	165.521	81.1203	78.3238	237.013	96.1262	34.7748	165.188	133.319	49.0898	46.5041	159.662	280.47	172.319	81.262	24.1338	56.0718	90.7602	60.4233	139.951	96.3474	119.115	129.07	130.442	116.722	110.777	143.101	63.8249	173.858	61.0459	193.264	146.048	394.016	179.843	332.438	154.499
LOC111559488	12.6346	66.2467	24.545	37.5898	48.0597	52.4313	56.5501	44.5265	37.9907	46.4803	18.2549	79.3693	166.625	41.0921	13.4632	43.2605	24.6873	9.52992	59.1289	36.9748	65.8391	17.2056	30.1908	4.55152	56.3743	47.6894	33.9714	71.2488	42.621	131.129	52.9561	51.0032	46.578	32.9243	231.962	35.751	38.3385	63.8363	212.357	141.47	38.7781	42.9778	71.2247	133.6
LOC123382332	0.0360017	0.446134	0.470226	0.872136	0.591837	0.189144	0.274275	0.00769737	0.0552058	0.280131	0.0817068	0.222294	0.454041	0.141206	0.0826553	0.214337	0.100995	0.118682	0.250596	0.493762	0.794199	0.0954052	0.0288654	0.0331083	0.552719	0.187656	0.0590617	0.0831686	0.13746	2.01606	0.437651	0.150713	0.101219	0.258979	7.92383	0.107412	0.0353588	0.82389	5.52389	3.05067	0	0.275393	0	1.24112
LOC123382340	0	0.0737987	0.23969	0.0824384	0.108778	0.0139057	0.0756167	0.0135817	0	0.154463	0	0.0653714	0	0.00552364	0.0136727	0.0236369	0.00385534	0.0130881	0.0829062	0.0151254	0.0769153	0	0	0	0.203177	0.0594965	0.0173687	0.00230518	0.0454767	1.37362	0	0.0153538	0.0223247	0.0829412	5.00837	0.0473809	0.0311946	0.330391	1.63425	1.95374	0	0.00964129	0	0.560031
GSX1	0	0.139417	0.104495	0.0778693	0	0	0.171422	0	0	1.57574	0	0.37049	0.158386	0	0.00794763	0	0	0	0	0.0881718	0.05225	0	0	0	0.2303	0.131945	0	0	0.0859123	0.140269	0	0	0	0.0354766	0.204501	0.537058	0	0	0.285718	0.0896549	0	0	0	0
TRNAQ-UUG	0	0	0.521244	0	0	0	0	0	0	0	0	0	0	0.208209	0.0792893	0	0	0	0	0.0488691	0.148934	0.0566552	0	0	0	0.146261	0.982046	0	0	0.279879	0	0	0	0	3.67235	0	0	0	0	0.0894439	0	0.109026	0	0
PDX1	0	0	0	0	0	0	0.305005	0	0	0	0	0	0	0.0352767	0.158379	0	1.58273	0	0	0	4.07726	2.70996	0	8.38712	0	0.0521703	0.0350289	0	0	1.71709	0	0	0	27.1553	2.21228	0	0	0	2.98244	1.38783	0.082026	0	0	0.9542
CDX2	0	0	0	0	0	0	0.929929	0	0.0114832	0	0	0	0	3.51281	0.0641425	0	0.0977665	0.00822888	0	0	0.250903	0.0170099	0	0.447638	0	0.0683087	0	0.00027175	0	0.382801	0	0.0289601	0	93.0833	0.694211	0	0.0147097	0	0.776568	0.434143	0	0.00636484	0	0.247689
URAD	0	0	0.045629	0	0	0	2.63484	0	0	0	0	0	0	0.145811	96.6864	0	15.4777	0.0215934	0	0	0.0130375	0	0	0	0	0.0768209	0	0	0	0.0245002	0.191106	0	0	36.9778	0.0714384	0	0	0	0	0.105702	0	0	0	0.0191165
FLT3	0.00542224	2.33495	40.6388	47.3435	2.58498	1.3389	0.834437	0.00927447	0.0166292	2.04626	0.123059	24.0943	5.24486	0.27472	0.29542	13.4614	4.25206	0.0297914	34.2702	18.6428	2.46875	2.03357	0	0.299189	30.1765	2.96408	1.31651	1.08851	17.7424	0.459704	1.92472	1.39445	2.85077	3.78724	1.49811	65.8742	15.8937	19.3237	1.04999	0.787495	14.9698	3.96042	0.913185	0.404843
LOC109496442	0	0.60289	3.18637	2.29773	0.182958	0.0233885	0.234742	0.00979007	0.00146281	1.18764	0.0389702	0.946358	0.245094	0.0367192	0.0753074	0.397556	0.0802833	0.132604	1.12882	3.06442	0.411706	0.0091489	0.0118175	0.00614098	1.11795	0.115608	0.0417328	0.0560803	0.728463	0.956249	0.088134	0.110675	0.134102	0.0924996	1.62995	3.67719	0.302623	0.385018	0.535002	0.57851	1.48541	0.0911571	0.438161	0.30114
LOC102901710	0	18.9469	11.3723	18.1753	4.08695	2.27487	8.22475	0.47839	0.171552	22.343	3.55464	14.7877	10.8353	1.14862	1.03179	3.8483	1.35462	2.45869	11.7674	4.79116	5.29263	2.30588	0.547519	0.205768	19.2113	1.02049	0.815706	0.822783	6.78701	22.3638	1.32977	2.09113	2.62115	1.5777	54.7025	4.93254	4.17533	13.8615	19.3095	15.8741	18.7828	2.0889	7.42235	12.5884
PAN3	0.0323047	11.0327	10.0065	13.4527	13.8516	4.50305	8.07393	2.57869	1.86905	12.3885	4.84269	6.93966	12.5959	3.07137	1.85771	13.6682	6.81348	2.19096	5.27367	12.9027	12.4053	0.923462	4.43643	0.230587	6.08174	8.1148	4.91708	5.08188	13.5861	18.8308	11.2937	11.8593	11.7348	5.23338	36.793	6.25632	7.9369	4.22609	19.8599	14.8185	42.3014	8.09544	12.0831	10.5761
FLT1	0.00789668	6.59755	19.8367	16.331	14.8968	3.08462	10.8424	0.122984	1.26634	5.22198	34.256	14.5711	19.2223	30.0875	2.47042	12.0366	6.72873	9.0032	18.3911	19.9657	8.32837	1.35083	0.439637	0.308446	18.0257	0.160311	0.0881831	0.205056	42.4081	4.95329	25.7156	4.1275	4.10497	3.61308	7.53726	25.472	3.25575	13.333	2.7654	3.55603	2.08411	11.7096	4.38427	2.52495
LOC102901737	0.0215926	0.60024	2.0001	1.40464	1.68208	0.192137	1.18352	0.0439204	0.0644316	0.801471	3.82769	1.42693	1.05573	1.29393	0.358046	1.78236	0.828387	0.966404	0.711687	2.14554	1.92489	0.0781622	0.0698847	0.0246874	1.89345	0.317877	0.265515	0.0962305	3.55177	1.26457	2.51705	0.473941	0.659585	0.46834	1.75241	2.28437	0.573163	1.35009	0.563188	1.06521	1.44078	0.784833	1.11687	0.35823
LOC111559501	0	0.111783	0.217073	0.0681106	0	0.0114889	0.16993	0	0.00502993	0.15314	0.163779	1.18822	0.731167	0.978518	0.403773	0.0390575	0.201734	0.0504626	0.347052	0.168526	0.179543	0.018213	0.022575	0	0.100719	0.0833515	0.04305	0.0166647	0.651261	0.114511	0.127601	0.0507412	0.0368893	0.133173	0.363707	0.0782921	0.0805404	0.272969	0.118014	0.300607	0.0336029	0.104748	0.175774	0.0925394
POMP	31.6687	137.169	120.985	146.714	94.0256	86.5734	169.31	161.634	140.492	133.359	160.109	190.538	372.558	320.945	48.4012	132.453	168.162	129.994	216.054	289.171	164.298	621.797	247.601	12.1165	194.683	49.3005	40.5171	370.331	179.643	114.814	112.636	118.119	114.628	193.435	147.871	130.257	88.7908	138.068	131.914	140.598	155.069	190.989	80.5814	143.459
SLC46A3	1.08165	2.23736	6.56354	10.54	8.08492	9.81463	1.90451	0.329778	0.628878	1.80533	7.48319	7.43872	10.424	1.47153	7.53716	17.7042	23.199	2.94812	9.41697	9.68573	6.85222	7.6256	1.42362	0.554461	9.01383	8.48046	5.40744	3.08345	16.3387	8.56005	6.16534	4.90335	10.823	9.48085	6.95567	10.4029	13.5986	5.68356	5.26986	5.58682	19.3995	5.89814	7.14205	4.84796
LOC123382549	0.012643	0	0.196693	0.0175015	0.0138561	0	0.0211903	0	0.00775486	0.0393505	0.0114775	0.0208173	0.00593301	0.00469063	0.0183092	0.0903251	0.0332849	0.0514038	0.0140806	0.0382579	0.0415214	0.00893449	0	0	0	0.209235	0.0857306	0.0157827	0.0675822	0.452401	0	0.00977874	0.0142185	0.0104653	1.32832	0.0603532	0.0571195	0	0.36657	0.382353	0.129518	0.00828965	0	0.0664163
MTUS2	0	24.2449	26.4249	23.2604	1.44484	0.779057	5.64484	0.183834	0.0450553	13.912	73.345	22.0146	4.68254	0.262571	0.475413	1.98672	4.6644	0.0368183	24.1319	5.26146	1.72383	1.16341	0.0610192	0.0255987	21.9516	0.236781	0.0547758	0.131316	30.5042	1.5266	0.946644	0.725624	0.611593	2.23657	3.23555	12.8279	0.766323	20.8821	2.09544	1.92451	6.77859	0.353044	1.49162	0.895962
LOC109496599	0	2.21793	8.04081	3.47401	0.0319814	0.0476975	0.213424	0.0166379	0.0119327	1.46835	8.56555	3.76382	0.397128	0.0424039	0.140866	0.196898	0.246849	0.00427553	2.88165	0.112656	0.373019	0.20229	0	0	2.40932	0.0811236	0.0340432	0.0197673	4.07053	4.54061	0.0567589	0.030094	0.0656357	0.207043	12.2884	1.61358	0.0878922	3.33502	6.58753	5.04627	0.478307	0.0151178	0.059571	2.30891
LOC109496695	0	1.27124	10.4809	1.28694	0.140535	0	1.10392	0.1974	0.0196634	0.698446	5.47128	1.47797	0	0.0475746	0.140408	0.152687	0.110686	0.0845451	0.928282	0.251242	0.0340307	0	0	0.0235852	0.524984	0.233939	0.112196	0	2.10531	0.511606	0.249414	0.0991806	0.14421	0.131416	1.53837	0.535614	0.302261	1.28053	0.597039	0.699983	1.97044	0.0280258	0	0.0249491
SLC7A1	0.26063	8.1891	12.8434	22.5535	12.0559	16.5169	7.12152	28.2617	6.62306	8.3459	5.43434	34.7437	18.4124	20.5428	0.223524	3.70014	4.68575	0.667617	30.5907	10.903	1.99838	0.513468	29.865	1.42007	23.0356	1.89521	1.08108	54.0554	12.8734	7.56455	13.2688	26.1199	18.8705	5.4099	12.6668	18.0329	3.16673	30.9774	7.71935	7.65031	24.2348	10.337	7.75382	5.4049
LOC109496642	0	0.721621	4.77763	0.470226	1.38276	0.407921	2.05552	0.116204	0.327416	0.906223	0.264321	1.43824	0.0910896	0.0720153	0.236537	0.635599	0.0774912	0.138644	0.54045	0.240865	0.0321959	0.102878	0	0.499824	0.397343	1.65678	0.424588	0.335291	1.25993	1.91189	1.55738	3.22786	1.96466	0.214231	5.96285	0.347476	0.324092	0.646128	1.68428	1.92969	3.281	0.136698	2.22891	0.632585
LOC109496619	0	0	0	0	0	0	0	0	0	0	0	0	0	0	0	0	0	0	0	0	0.206984	1.06169	0	0	0	0.0524565	0	0	0.1537	8.29778	0	0	0	0	22.9759	0	0	0	19.4453	11.5906	0	0	0	3.89648
LOC109496645	0	0	0	0	0	0.00133193	0	0	0	0	0	0	0	0	0.000537276	0	0	0	0	0	0.0015138	0.0371427	0	0	0	0.0133797	0	0.000441594	0.00290392	1.0042	0	0.00294126	0.0213832	0.000599573	1.91679	0	0.00298791	0	1.51503	0.87996	0	0.000600256	0	0.573407
LOC111559507	0	0	0.0270157	0	0	0	0	0	0	0.0905302	0	0	0	0.00674457	0	0	0	0	0	0	0.0482447	0	0	0	0	0.075806	0	0.0422207	0.0444229	3.00997	0	0.202474	0.2944	0	7.69801	0	0.0228538	0	5.13387	2.86957	0	0.0346108	0	1.00168
LOC109496710	0.00811625	0.38378	0.319389	0.115308	0.203648	0.0299234	0.147748	0.00438392	0.00393021	0.21605	0.0620465	0.0914363	0.102234	0.0132729	0.057486	0.228886	0.103887	0.0159596	0.275931	0.160508	0.16863	0.0754675	0.0176393	0.00157136	0.0612097	0.901771	0.749374	0.347356	0.0603471	0.644432	0.11632	0.112334	0.196964	0.454954	1.97611	0.163132	0.862581	0.0568769	0.894093	0.772179	1.86856	0.076141	0.614776	0.335147
UBL3	4.35421	50.9169	190.555	296.949	90.8066	45.1817	34.9156	32.8047	34.4959	53.0249	58.5832	263.967	163.467	60.3863	38.7176	97.7887	93.6427	48.2535	209.474	220.307	44.2484	14.674	63.7835	3.7458	206.116	43.3862	28.6704	49.6259	217.76	89.5909	92.5867	80.7605	85.6559	64.1786	155.552	465.501	43.9344	179.521	101.119	61.452	91.4042	66.021	44.1073	70.9957
LOC109496855	0.0015326	0	0.00711739	0.0212155	0.0251947	0.0483116	0.0186815	0	0.00470026	0	0	0.0757048	0.00719205	0.0149258	2.75322	0.483593	0.0185205	0.00336822	0.0113933	0.0473775	0.00317757	0	0	0	0.0313725	0.0848784	0.0268189	4.44928e-05	0.0292585	0.00764327	0.28319	0.106685	0.155122	0.012082	0.0334297	0	0	0.0127539	0.0032435	0.0138925	0.0157002	0.0204697	0	0.0149093
LOC111559546	0	0.120515	0.135492	0.336561	1.38558	0.442815	0.0889086	0	0	0	0	2.00163	0.273826	0.00902026	0.113357	0.115799	0.314794	0	0.10831	0.719835	0.135498	0.137451	0	0	0.398153	0.139403	0	0	0.742646	0.0485009	0.662053	0.902635	0.437482	0.0613337	0	0.174092	0.0382062	0	0	0.224749	0	0.278678	0.297794	0.132451
LOC123382703	0	0	0	0	0.502682	0	0	0	0	0	0	0.755229	0	0	0	0	0	0	0	0	0	0	0	0	0	0.0597701	0	0	0	1.02936	0	0	0	0	4.50216	0	0	0	11.4544	2.70482	0	0	0	1.65096
LOC123382768	0	0	0.0313336	0	0	0	0	0	0	0	0	0.222189	0	0.0125161	0	0	0.0232956	0	0	0	0	0	0	0	0	0.0703377	0	0	0	0.302839	0	0	0	0	0.784913	0	0	0	0.571168	0.930179	0	0	0	0.367567
LOC123382700	0	0.0488939	0.925327	0.361844	0.383768	0.0414585	0.0661299	0.0134975	0.00605027	0.245607	0.241775	0.357312	0.312449	0.0526065	0.0696814	0.493295	0.0519371	0.123566	0.483366	0.388244	0.1106	0	0.0325854	0	0.444217	0.197948	0.0517828	0.0352223	0.783372	3.41399	0.0191857	0	0.0665586	0.0373253	9.02943	0.188348	0.124004	0.820854	4.38385	3.35017	0.0808387	0.0685076	0.498371	1.5123
KATNAL1	0.022511	3.0751	8.43678	4.52026	1.61666	0.314453	0.855068	1.06226	0.775662	3.68454	2.12532	6.03948	2.04316	0.638291	0.278571	1.41431	1.02572	0.879744	6.4122	3.05861	1.26633	1.60831	1.92764	0.0116905	8.16165	0.458649	0.220132	0.746776	5.1641	7.02252	1.00576	0.365634	0.402079	0.300015	13.5858	5.86127	0.438019	8.04641	14.3192	8.27896	1.52201	0.49315	1.04612	4.77682
LOC102902205	0.00354288	0.359211	0.450163	0.235928	0.213942	0.0485078	0.148778	0.0699644	0.0642051	0.367565	0.0536044	0.422487	0.329491	0.0794631	0.0342804	0.233298	0.0313381	0.0303192	0.125546	0.213854	0.294533	0.200238	0.0721143	0.0021721	0.469203	0.0551211	0.0328771	0.0422632	0.306207	0.646249	0.253192	0.0280251	0.0325992	0.0386784	1.51006	0.192186	0.0552521	0.354688	1.40416	0.931141	0.302449	0.0656737	0.266284	0.353116
LOC111559516	0.0113038	0.700388	4.13398	0.997539	2.78738	0.989796	0.654489	0.116008	0.0346672	0.527736	1.23141	0.558368	2.55945	0.498011	0.930287	4.37436	1.64895	0.881914	3.14729	0.531538	1.07995	0.878693	0.155591	0.0727677	1.38835	2.865	0.741771	0.748206	1.55375	3.10055	2.52842	1.11472	0.508495	0.74854	1.97251	1.41646	0.954771	0.658473	0.861218	3.29354	10.7693	0.231955	0.605733	1.06666
LOC109497259	0	6.59856	7.92842	4.28927	3.63841	2.55359	3.2731	0.708141	0.227588	8.14476	11.2398	6.00225	3.23804	2.69765	2.39031	9.05318	1.97559	5.25181	3.31314	4.70201	3.45192	1.21444	0.768775	0.129307	6.74255	2.45997	1.34415	1.80173	7.31717	2.38286	5.78621	5.91592	5.6516	2.63565	2.56528	6.57222	3.81043	5.98048	2.87101	3.61877	61.1904	1.76463	10.0262	2.47478
LOC123382856	0	0.630536	0.492286	0.205437	0.464701	0.683162	0.193821	0.174063	0.0520162	0.659865	0.230958	2.65303	0.79592	0.228104	0.0329491	0.201953	0.16653	0	0.873632	0.210463	1.3419	1.79358	1.61668	0	2.51712	0.0442033	0.148398	0.0861677	0.259035	0.824709	0.329891	0.0655915	0.0476855	0.294156	0.80157	0.101206	0	0.564573	0.412789	1.28064	0.694997	0.255363	0.0649192	0.717735
HMGB1	173.847	1610.72	243.834	453.214	338.57	169.59	868.826	246.43	102.811	1921.09	250.931	513.9	1213.45	396.25	49.6722	498.143	394.82	123.825	569.878	660.179	430.085	1101.57	601.226	19.2766	694.219	217.581	161.467	728.245	391.56	201.117	358.655	511.593	597.636	518.666	351.319	465.559	389.211	600.686	370.132	332.758	2316.78	535.943	560.209	296.271
LOC109497262	0	1.17334	2.52397	0.524281	1.76408	0.769393	1.03874	0	0.0232307	1.94502	0.653265	1.4343	0.302143	0.0474235	0.189961	0.901936	0.165092	0.29965	0.295263	0.30177	0.432199	0.0497054	0.0417051	0	0.73652	0.118449	0	0.0659708	1.09902	2.1627	1.62065	3.29801	3.43941	0.0477716	6.40244	0.90398	0.0595162	0.567318	1.50689	2.60089	2.48312	0.047826	2.02953	0.895315
LOC109497264	0.0106938	2.3522	5.44865	1.57285	2.03005	0.157848	1.1173	0.312258	0.36896	2.06241	1.33485	4.10012	2.26362	0.177275	0.55174	0.936804	0.480103	1.06011	1.77371	1.1853	0.71735	1.95841	0.624527	0.0224787	2.93176	0.191111	0.150373	0.203679	2.20876	2.99895	1.24427	2.0796	2.13039	0.118024	7.52353	2.77576	0.196554	4.34151	4.75804	3.99463	1.01725	0.28337	0.9005	1.80989
USPL1	0.029909	6.9924	7.87622	8.94404	3.45931	1.57883	5.71599	2.06915	0.604412	8.24923	3.53942	9.33925	9.55913	3.40248	1.00417	4.07323	3.1748	2.77305	7.81593	7.59431	5.2579	3.13911	3.64485	0.169452	13.9941	1.89288	0.866843	4.20684	7.13731	10.2541	3.39953	3.29233	3.19241	2.66771	18.6251	6.65112	2.19578	12.5292	10.3333	8.70241	10.0563	3.42067	4.6855	7.40931
TRNAN-GUU	0	8.38762	8.08281	10.485	5.65177	0	4.71456	0.882077	1.38388	2.00635	0	11.6754	10.5876	1.07621	4.55378	3.07024	0.723345	3.11674	20.8198	2.66634	6.28694	0.585692	0.709832	0.237127	18.4738	0	0	1.51584	11.568	6.75112	16.613	6.98017	5.79959	4.67524	3.74955	4.6158	2.40583	25.2126	4.36557	6.54965	0	2.77077	5.92168	5.39305
LOC111559523	0.00629433	0.300464	1.24777	0.667045	0.27329	0.0911933	0.245139	0.0200404	0.0202919	0.255772	0.112272	0.405017	0.1974	0.0784487	0.571377	0.339084	0.177544	0.504596	1.65918	0.43747	0.596466	0.00459983	0.00499939	0.00419021	1.0271	0.0910721	0.0313234	0.0426742	0.81393	0.411032	0.764373	0.181241	0.237907	0.091482	0.645796	0.233041	0.142562	0.786347	0.93949	0.576834	0	0.319376	0.767363	0.186166
ALOX5AP	152.73	0.800769	4.46539	4.50836	16.3664	13.3897	1.12638	0	0	0.84472	1.73641	7.57561	8.41191	0.172614	0.355604	60.9697	6.59961	0.536819	10.939	11.4279	1.51426	1.36212	0	0.137869	37.408	6.73312	4.67011	5.28347	5.07765	0.615528	6.498	6.95721	11.4967	12.114	0.25841	15.5932	14.1757	30.9527	0.919006	0.573655	2.85973	15.8997	2.49317	0.660059
LOC109497268	0.00812644	0.100703	0.924609	0.140616	1.13553	0.170778	0.0619104	0	0	0	0.516409	0.669027	0.22881	0.0301495	0.133471	7.49907	0.552391	0.0535789	0.633533	0.624496	0.0754821	0	0	0.0298934	0.332699	0.78363	0.0711022	0.452962	0.015514	0.0101319	0.869337	1.31993	0.86821	0.845637	0.354514	0.775852	0.750245	0	0	0.178088	0.166497	1.53039	0.124419	0.0553385
LOC123383067	0	0	0.0196043	0	0	0	0.0128642	0	0	0	0	0.139016	0	0	0	0.0251325	0.0929171	0	0.0470144	0.00367599	0.011203	0.308971	0	0	0	0.0440078	0.0738707	0	0	0.68948	0	0.0326506	0	0.0033279	0.337625	0	0	0	0.196547	0.550862	0	0.0225529	0	0.726879
LOC102902594	0	0.569304	3.64635	1.11774	0.93832	0.263306	0.466663	0.719125	0.345832	1.14824	0.0758288	3.1633	1.52218	0.0251792	0.0167187	1.71567	0.0871207	0.0290659	9.18256	0.845564	1.12038	0.0597306	0.0996438	0.00256054	5.84201	0.0308401	0.0121806	0	1.4086	0.272507	0.35878	0.053838	0.0626251	0.167915	0.495982	1.71956	0.13673	3.47554	0.141421	0.394115	0	0.353623	1.89699	0.215335
LOC109492552	0	0	0.860037	0.124045	0.196414	0	0.364096	0.153273	0.0366426	0.371871	0	0.196728	0.154188	0.00554094	0.00422015	0.533495	0.0309393	0.0262582	1.23085	0.145659	0.178358	0	0	0	0.61144	0.108986	0.156808	0	0.228095	4.6328	0.174293	0	0	0	7.14516	0	0.058673	0	5.33532	6.29832	0	0.195847	0.0914641	5.56747
LOC123383109	0	1.08796	0.978532	0	0.641459	0.410006	2.44357	2.34264	1.74119	0.182171	0.212538	2.69844	0.466932	0.711167	0.0413472	0.627233	0.454694	0.0257266	3.25928	0.397548	0.147564	0.0886324	0.451157	0	6.70949	0.0457627	0.102422	0.0373821	0	0.467037	0.227686	0.679053	0.72406	0.239935	0.858359	0	0.0919762	4.48108	0.445931	1.34797	0	0.449147	0.358449	0.409961
MEDAG	0	15.8141	1.85928	1.07064	277.624	31.838	64.1979	747.472	321.822	19.7181	27.5274	6.06776	55.4774	70.8543	0.334248	70.9925	85.5035	6.17417	3.58482	77.5686	3.31427	0.0780799	131.469	0.401657	5.82064	0.142285	0.0796127	0.0184909	9.60611	7.09039	100.503	56.3721	51.9066	33.9971	5.83844	1.30308	15.3978	5.45188	9.51287	15.2562	3.26246	40.1325	12.2594	7.09025
LOC109497286	0	0	0.0553131	0	0	0	0.036296	0.0407451	0	0	0	0	0	0	0	0.0709106	0	0.0785288	0.5306	0.0777878	0	0	0	0	0	0.0310417	0	0	0	1.7523	0	0	0	2.04693	5.13105	0	0.140376	0	3.47856	2.33492	0	0	0	2.32895
TEX26	0	0.0549807	0.473108	0.0106299	0.00748071	0	0.00416013	0	0.00418675	0.0849794	2.41665	0.410224	0	0.00158276	0.00216986	0.0487653	0.342904	0.00300024	0.245163	0.128289	0.00724586	0.00723542	0.000939536	0.00502179	0.597326	0.0769396	0.0104514	0	0.662417	10.9692	0.0132764	0	0	1.04015	13.0123	0.105898	0.0884918	0.595462	23.9077	10.8922	0.013985	0.00265213	0.0940555	10.9096
LOC111559529	0	0.339728	2.30759	0	0	0	0.0417717	0	0	0.426637	2.86209	0.338551	0	0	0	0	0.0473276	0	5.26683	0.767929	0.0181888	0	0	0	9.18948	0.187555	0.209884	0	2.27667	1.7832	0	0	0	0	2.41687	0	0	10.1329	2.75592	2.40589	0	0	0	1.28015
LOC123383320	0	0.159334	1.09471	0.103826	0	0.0450344	0.0391821	0	0	0	0.544712	0.846833	0.130732	0	0	0.0510327	0.303356	0	1.12171	1.47513	0	0	0	0	9.65065	0.150795	0	0	2.44384	1.11147	0.083362	0	0	0.0135149	1.16858	0	0	14.6945	0.961465	0.918749	0	0.00312238	0	0.108404
LOC111559531	0	0.0735691	1.94372	0.195182	0.065064	0.0103969	0.00904577	0	0	0	0.10779	0.391008	0.132334	0	0.00419389	0.035345	0.0281845	0	1.65296	1.27865	0	0	0	0	10.5121	0.027077	0	0	3.21132	0.816725	0	0	0	0.00936036	1.65107	0	0	10.2924	1.25643	1.08458	0	0.00216254	0	0.695935
LOC109497276	0	0.0991825	3.80056	0	0	0.0280332	0.0243902	0	0	0	0	0.395355	0.0563387	0	0	0	0.0932656	0	1.47078	0.114127	0	0	0	0	13.9262	0.125156	0.0350142	0	0.611188	3.29303	0	0	0.0900105	0.0063096	2.56051	0	0.0314432	17.2507	5.1832	2.15421	0	0	0	2.57721
LOC102900692	0	0	1.76181	0	0	0	0	0	0	0	0	1.95545	0.0309616	0	0.0093217	0	0.563808	0	3.15965	0.017236	0	0	0	0	3.84916	0.206343	0	0	0.70536	0.987123	0	0	0	0.145636	1.679	0	0	2.41583	0.837791	1.32233	0	0.0112155	0	0.243901
LOC123383316	0	0	1.08007	0	0	0	0	0	0	0	0	0.434544	0.0309616	0.00611956	0	0	0.150918	0	5.07014	0.0545806	0.00875479	0	0	0	1.65446	0.0945741	0	0	0.730551	0.880185	0	0.0510307	0	0.291271	1.36719	0	0.05184	0.658863	0.837791	1.69694	0	0.00720997	0	0.134787
LOC102899192	0.0280395	7.1855	14.8298	10.79	1.73935	1.58668	5.73024	3.6	2.11993	10.0464	2.09404	16.8785	3.88884	5.38131	0.844924	2.77007	3.2982	1.1588	14.2343	7.46918	14.1791	6.19233	15.3023	0.0777611	27.896	1.20777	0.691911	5.23251	13.2812	11.0667	3.0443	3.48857	3.17551	5.86943	26.3709	15.3836	2.74786	26.5531	28.4889	11.4931	8.23576	1.59312	7.20413	8.46168
HSPH1	0.162361	18.2088	44.2504	25.955	3.91512	3.56421	13.2996	13.6107	7.44211	22.2042	5.00956	43.1325	13.585	18.8371	2.1566	6.76978	10.2847	3.59494	34.2696	18.4119	39.4492	30.3415	45.0697	0.197945	67.8199	3.0978	2.31219	18.0614	28.0977	17.5222	7.14017	7.46504	6.50808	15.7046	46.9131	32.857	6.57331	57.1256	26.159	16.3791	17.7424	5.39856	12.8361	12.2305
LOC109497283	0	0.256101	0.261751	0.234068	0.0411807	0	0.171759	0	0.0115239	0.789421	0	0.247479	0.0176331	0.0609907	0.0106177	0.178966	0.0616247	0.0371612	0.376634	0.451543	0.351512	0	0.0310324	0.00691115	0.384589	0.0636544	0	0.00981767	0.258244	1.38203	0.0730854	0.116251	0	0.0118488	2.69271	0.134529	0.0295237	0.0625388	1.9324	1.3204	1.23178	0.0182497	0.287649	1.12221
B3GLCT	0.0119738	5.34991	4.4315	6.88632	6.77636	1.40726	3.01772	7.7587	3.56133	4.29612	1.65464	6.24502	15.8288	2.84021	0.483782	5.67915	3.14215	0.779947	3.03625	5.38383	3.30447	1.39291	27.311	0.0917623	7.85924	1.01391	0.435548	1.34815	5.24991	1.92967	2.63622	2.3633	2.44753	3.66298	2.22081	6.12732	1.77096	4.89171	1.59645	2.0371	6.77819	3.65344	3.52728	1.33092
LOC123383373	0.0116347	0.342421	1.22584	0.201321	0.470191	0.0101877	0.146252	0.4801	0.142727	0	0.105621	0.22749	0.0989592	0.275853	0.161812	0.415605	0.109214	0.0910922	0.016197	0.0557227	0.78446	0.570395	0.326296	0	0.193508	0.204676	0.0827104	0.125395	0.138822	0.540345	0.205082	0.314959	0.613333	0.513632	1.48567	0.130171	0.0799885	0.108923	0.264696	0.335517	0.208579	0.0335513	0.44533	0.062251
LOC109497302	0	0.438685	4.95255	0.52067	1.09116	0.0619954	0.377573	0.0302754	0.094997	0.757498	0.200856	0.255012	0.0311483	0.0656689	0.268833	0.395172	0.0878503	0.389002	0.271052	0.0635797	0.160004	0.0982794	0.0243634	0.00813887	0	0.193172	0.116151	0.0411083	0.523762	1.62754	0.45186	0.273805	0.248823	0.0627917	2.05912	0	0.156458	0.220945	1.11443	1.34705	0.589305	0.0139696	1.45662	1.28605
LOC123383370	0	0.713973	3.1557	0.527796	1.6343	0.023741	0.702299	0.695634	0.0831519	1.16033	0.338437	0.418528	0.182899	0.27584	0.331592	1.0694	0.658216	0.640561	0.188726	0.211751	4.48926	3.1905	0.772053	0.0187006	0.936579	0.680127	0.192746	0.148077	0.815236	2.20572	1.59855	0.288346	0.552661	0.931113	3.48681	0.161785	0.233004	0.169221	1.35561	1.43345	3.95797	0.492989	1.29723	0.481362
LOC123383490	0	0.0672001	0.800403	0.0197868	0.34819	0.0099097	0.0107774	0.00322626	0.00506163	0.00366918	0	0.164021	0.00636196	0.00109343	0.0144905	0.0336889	0.039143	0.386036	0.0518606	0.00952955	0.10684	0.0292769	0.00454346	0.000433655	0.202707	0.0943229	0.0330067	0	0.0234059	44.7066	0.871321	0.0984747	0.206821	0.00446088	160.272	0.0281377	0.0231566	0.156965	7.3796	26.2457	0.0241533	0.00217572	0.198541	4.55079
LOC105260585	0	0	0.152628	0.0146759	0.108721	0	0.00276922	0	0.000928978	0.0235696	0	0.0486285	0.00142147	0	0.000499649	0	0.0380976	0.0577503	0.00674705	0.00749506	0.019494	0.0264514	0	0.000557131	0.0558054	0.0179599	0.00795091	0.000175875	0.0185049	4.0362	0.175277	0.0351427	0.0442851	0.00143276	16.5617	0.0108448	0.00595001	0.0302488	3.53736	3.62717	0	0.000294234	0.0602897	2.07502
LOC109497305	0	0	0.722697	0	0	0	0.0193563	0.0869157	0	0	0	0	0	0	0.0224354	0.0756317	0.0333622	0.261741	0	0.00506097	2.48709	6.93017	0.0174859	0.0408894	0.130023	0.0869094	0	0	0	2.10132	0.741267	0.0982562	0.214299	0.0150221	8.90567	0	0	0	1.33082	1.6379	0	0.0123398	0	0.953131
RXFP2	0	1.97916	17.9426	0.0162563	0.334626	0.213886	0.690683	0	0.0324141	2.57684	0	0.232035	2.27049	0.139421	0.00995508	0.419493	0.197665	0.0103236	9.2729	0.0879451	2.8158	0.578547	0	0.00431989	46.5398	0.0673334	0.0513749	0	0.143483	0.515384	0.582457	1.58953	0.158482	0.088875	0.56354	0.168178	0.119952	25.0962	1.61049	0.494121	0.0962422	0.0376438	8.59436	0.822546
LOC123385579	10.224	0.543566	1.6551	2.06196	0.660998	0.435298	0.295187	0.74402	0.173761	0.22754	0.232285	1.20374	0.214418	0.110187	0.036151	0.565818	1.20528	0.674806	0.264614	0.318304	0.240092	0.393005	0.040251	0.0268926	1.75839	3.10567	5.67687	0.0795884	0.767615	0.519545	1.22643	0.339266	0.34942	0.244938	0.983359	0.174492	0.0574411	0.973401	0.185662	0.418005	0	0.108295	0.279824	0.16713
FRY	0.0361391	2.93384	14.1302	14.4144	7.17815	2.79509	1.21197	1.046	0.617489	2.40618	5.57623	13.2642	1.78626	0.216628	0.672067	2.80653	1.10066	4.64798	4.62475	2.63218	0.33719	0.067232	0.121595	0.0694487	11.5024	5.31841	4.7815	0.0412771	8.50851	1.58816	7.95681	5.50334	4.71799	0.561951	1.99177	6.10117	0.557503	9.84961	0.944442	1.16065	0.486141	0.764655	0.532346	0.69534
LOC102901028	0	0.17489	3.04766	1.17219	3.09343	0.494312	0.559098	0.0965587	0.173131	0.549074	0.25624	1.16189	0.794743	0.0981754	0.139577	3.697	0.298458	36.6771	2.51485	0.559175	0.21536	0.178095	0	0	1.44448	73.7839	40.9343	0.0204858	0.808287	0.633453	12.9016	7.64102	6.6661	0.0667548	2.10357	0	4.74048	1.87912	0.179208	0.705727	0	1.65878	0.864308	0.864951
LOC109497331	0	1.4225	25.0849	3.97259	7.96764	1.25085	0.855091	0	0	2.38187	0.231575	14.0707	0.897804	0.212941	4.76186	5.16358	2.47711	1.82202	4.97171	1.25505	0	0	0	0.0586477	8.877	0.531858	0	0	11.8825	0.954131	3.47312	5.22846	5.45069	0.663622	1.39104	8.06736	0.200429	14.2228	0.863776	0.960506	0	0.0929199	0	0.0992627
ZAR1L	0.0479638	1.15972	3.76527	6.08289	3.77605	1.6805	0.8536	0.272637	0.198112	1.14476	2.61472	5.09346	1.62444	0.15548	0.214249	2.07965	0.734621	1.48019	2.84355	2.6064	5.42251	17.6056	0.0497926	0.0941588	5.55046	1.4447	1.25898	0.0418199	3.43821	2.13308	3.24005	2.76858	2.8287	0.377224	5.72478	3.23206	0.761331	4.02233	2.49702	2.05132	0.942995	0.795837	0.773907	1.10813
BRCA2	0.00175705	2.34119	0.853407	1.59221	1.41389	0.542791	1.27581	0.884173	0.0808292	3.66539	0.312634	0.459997	1.35244	0.475095	0.40259	1.90594	0.69185	0.158997	1.5009	0.645595	1.70413	0.742646	0.73256	0.0437893	1.14555	0.187863	0.0718702	0.606826	0.498455	4.60871	0.822765	1.21426	1.48842	0.547685	11.4475	0.392116	0.927551	0.973807	3.0265	3.21063	5.87415	0.69528	1.39483	1.70527
N4BP2L1	0.071671	7.4224	21.2209	26.3941	18.4194	3.80847	5.00932	0.458835	1.29371	7.0586	9.47143	8.65684	39.6895	1.82334	12.481	53.3249	29.1204	3.45403	23.1081	16.5751	11.0875	9.82416	1.0598	1.24854	17.2491	8.91387	5.37053	3.22088	12.3964	14.4454	10.9231	4.08627	4.6346	4.83	11.9594	12.5489	22.314	13.7178	6.45723	13.5942	13.6039	12.2009	20.5354	8.93643
LOC101080934	0.16302	15.9883	27.1401	22.4081	13.994	2.52769	6.9769	5.78588	7.6359	17.422	23.1379	17.517	19.4017	5.2847	4.27569	12.7515	9.86174	19.5468	11.4014	20.2554	8.77428	8.70977	7.83806	1.38559	18.9634	7.81914	5.25552	4.64543	27.6876	12.725	11.6587	9.39353	11.6769	5.64548	19.6439	16.9258	7.95126	12.4547	14.461	10.485	21.5859	8.94114	10.7324	8.90746
PDS5B	0.00554701	17.5852	15.522	16.0439	5.50052	1.52215	6.2534	2.03515	0.948084	20.1648	2.83545	11.0707	7.05478	1.9712	0.695767	5.40584	1.91111	1.90973	13.6813	4.77438	4.24847	1.97337	4.2707	0.138125	15.2133	1.68059	0.834403	2.25164	9.12829	7.02923	3.28652	3.12947	3.64935	2.3723	13.0099	9.97815	2.5882	12.4634	6.58035	4.0671	19.128	2.33587	5.30631	3.36287
LOC109497366	0	0	0.0299027	0	0	0	0.0196219	0	0	0	0	0	0	0.613151	2.63746	0.894479	0.10838	0	0.0239038	0.00186901	0.00569603	0	0	0	0	0.078313	0	0	0	0.0428161	0	0	0	0.00676809	0.0468166	0.0256145	0	0.178612	0.0181694	0.0265112	0	0	0	0.0250557
LOC109497357	0	0	0.0579919	0.0432154	0	0	0.0190269	0	0	0.145749	0	0.051403	0	0.55595	0.936176	1.89579	0.324712	0	0.069537	0.005437	0.0124274	0	0	0	0.0639051	0.187134	0.0819443	0	0	0.0311383	0	0	0	0.00492215	0.0226985	0	0	0	0	0.0273659	0	0	0	0.00911099
KL	0	0.593601	9.93945	1.71299	0.43748	0.316911	1.00965	0	0	0.165656	0.459017	7.14234	1.59226	34.1324	0.669259	20.2878	12.3772	0.0584859	13.0556	0.929262	0.259545	0.0940302	0	0.0244734	9.53318	0.717842	4.0631	0.295123	1.70703	0.729948	0.155284	0.123499	0.209497	0.618887	0.565962	5.95483	2.83324	11.8259	0.416769	0.495185	0.0545238	0.359314	4.27815	0.636859
LOC109497379	0	0	0.427426	0	0	0.0245612	0	0	0	0	0.0318299	0	0.0493611	0.837408	0.0136228	1.00197	0.065069	0.0154114	0.0390491	0.0381649	0.0116312	0	0	0	0.215319	0.0639657	0.153388	0.018322	0	0	0	0.0271188	0	0.0331689	0.0764792	0.0836871	0.165294	0	0.0296814	0.0474996	0	0.00936598	0.241568	0.0238763
LOC109497405	0	0	0.25252	0.256606	0.487575	0	0.150638	0	0	0	0.897504	0.488355	1.97176	0.265925	0.0349201	0.353157	0.116613	0.0217277	1.48643	0.172181	0.0393557	0.00998071	0.0272164	0.0181838	1.41664	0.0772986	0.173003	0.0473571	0.760244	2.14477	0	0.0382334	0	0.124701	2.04865	0	0.116519	1.97454	3.808	1.62888	0	0.0216075	0.151366	2.20437
STARD13	0	6.75232	11.4581	6.00167	22.6516	4.33177	2.75356	2.4191	3.06126	4.22542	5.55767	5.91798	9.61256	3.48869	9.06625	12.0288	4.61031	2.18376	6.76086	9.89684	6.75296	0.520472	9.25602	0.634184	5.57489	0.759408	0.613276	12.4683	6.21313	3.51974	13.5947	6.64569	6.02603	3.33624	4.23046	9.36847	1.37035	5.04151	1.63457	2.69315	0.889909	6.6149	4.10665	2.29333
LOC123383743	0	2.78553	10.678	1.44893	18.6549	0.384639	0.622248	0.575254	0.799889	1.54878	2.71043	1.69519	2.26268	1.19524	8.74207	5.49606	2.07801	5.03062	1.07017	2.189	2.69354	0.0485034	2.90508	0.01578	0.807871	0.348817	0.0750665	2.9656	2.04409	3.69681	8.97782	4.72471	3.76296	1.11734	3.80519	2.27303	0.370758	0.656849	0.581029	1.7448	0.843747	1.24091	2.25933	0.504115
LOC109497406	0	2.16596	5.88489	30.0174	9.53791	1.32642	0.388381	0.143253	0.156346	1.70003	0.727253	2.75803	0.580991	0.162117	3.75308	1.90777	0.306455	1.49651	3.83239	0.773698	0.531502	0	0.030073	0.164088	4.3233	0.711767	0.0637206	15.0359	1.6545	2.07933	17.193	2.84459	3.43991	0.628668	3.1771	8.77823	0.436317	2.54543	0.215779	1.78316	0.37303	1.15575	2.00704	0.212543
LOC123385589	0.118597	2.68294	5.22842	41.2963	9.47736	2.46209	0.732851	1.03162	0.929501	0.934087	0.583176	4.28953	4.339	1.155	2.21003	1.78479	0.705521	0.656818	7.39292	1.32436	1.37907	0.0887976	0.834347	0.342344	5.1703	0.471273	0.259415	63.1478	2.73805	1.42393	16.0972	2.42061	2.17882	2.18848	3.26713	9.91525	2.58247	3.23494	0.663451	1.20121	0.202488	2.39352	1.62662	0.26087
RFC3	0.187624	16.3023	3.94122	5.17182	4.74611	3.00304	11.8041	19.6676	4.28549	21.9326	2.58461	2.87377	15.2443	18.1085	0.747473	4.7019	2.59875	2.46207	2.35685	8.6497	25.08	49.4542	24.468	0.469482	2.21062	2.33406	1.54617	16.9189	4.16497	26.4227	3.9888	6.54715	7.60592	7.29918	71.865	1.91366	3.95116	2.68698	31.4058	37.2852	17.1643	8.93926	4.89343	33.0047
LOC109497409	0	0.798821	2.16739	0.696026	0.50866	0	0.322161	0.0352831	0.0158157	2.24711	0.0468158	0.169824	0.0605007	0.0263075	0.00546453	0.184214	0.00222568	0.719685	0.402037	0.0673601	0.150544	0.0104123	0.00709832	0	0.105564	0.0806412	0.045121	0.0239539	0.433184	6.40392	0.275838	0.11966	0	0.028458	10.2363	0.30772	0.0202596	0.343321	6.53744	4.12602	0.63395	0.0300558	0.197389	3.74754
LOC123383758	0	1.16862	1.10399	0.299162	0.279912	0	0.227508	0.00672093	0.0241014	0.122298	0.178355	0.517587	0.165953	0.00911128	0.00555155	0.093574	0.032221	0.0518135	0.0875227	0.213852	0.302408	0.0376846	0.0432682	0	0.804341	0.14337	0	0	0.330062	0.725056	0	0.0607829	0.0883793	0.0185858	0.571389	0	0.0308734	0.523183	0.332632	0.538579	0	0.0267177	0	0.164368
LOC123383755	0	1.09637	0.462232	0.790969	0.363609	0	0.359482	0.0378325	0	1.37684	0.200794	0.606984	0.48438	0.0683839	0	0.175578	0.044548	0.162034	0	0.176556	0.474484	0.160027	0.0202966	0	0.905537	0.0960757	0	0	0.0563011	1.12146	0	0.2281	0	0.0813714	1.28655	0.175976	0	0.245419	0.280861	0.51997	0	0.0143234	0	0.322757
LOC109497407	0	0.3836	0.511414	0.333433	0.0890539	0.0327975	0.0853114	0.0172079	0.00949354	0.553991	0.0597159	0.249176	0.047211	0.00726759	0.00284279	0.0414662	0.0163658	0.0429446	0.0904974	0.109171	0.164897	0.00429693	0.025565	0	0.0712868	0.0403381	0.0203133	0.000835755	0.0742246	2.52837	0.0154662	0.0123004	0.0261095	0.00498434	3.2568	0.0831203	0.0288825	0.119141	2.84882	3.1421	0	0.00732927	0.00337682	1.69766
LOC109497422	0	0.0851418	3.04032	1.1617	0	0.0275025	0.0598212	0	0.0120408	0.0610986	0.4277	1.2121	0.276361	0.074651	0	0.0467485	0.0889584	0.168255	0.98382	0.45043	0.132846	0.0416171	0.0378285	0	2.41104	0.0767419	0.137406	0	0.239847	0.367125	0	0	0	0.0185705	0.292596	0.0937089	0.015424	1.38856	0.166179	0.523274	0	0.0886677	0	0.173781
LOC123383762	0	0	0.415181	0.176796	0	0	0	0	0	0	0	0	0	0	0	0	0.0165362	0.0280685	0	0.00556074	0.016947	0	0	0	0	0	0	0	0.0487641	1.84712	0	0	0	0	7.47526	0	0.100349	0	2.97321	4.20847	0	0.0248118	0	1.65245
LOC109497423	0	0.0810276	2.64882	1.18364	0.0881972	0	0	0	0.0123404	0.266131	0.549937	0.496903	0.0188825	0.0139955	0.00142125	0.0984587	0.164544	1.42596	0.324897	0.0753338	0.147724	0.115772	0	0	1.15315	0.0812733	0.0176031	0	0.107544	1.33698	0	0.00389026	0.045252	0.0031721	5.08694	0.360153	0	0.904096	1.6776	1.08862	0	0.02052	0	0.907555
LOC123383764	0	0.221396	4.32825	4.45168	0.0652671	0	0.117962	0	0	0.370711	0.756884	2.54949	0.279466	0.225089	0.00420698	0.141821	0.17349	2.90229	1.47573	0.623599	1.99532	2.24402	0	0	5.18102	0.147448	0.0521061	0	0.386552	0.890999	0	0	0	0.00938957	2.60883	0.764017	0.0935838	6.34351	0.25207	1.14492	0	0.114972	0	0.393953
LOC102901791	0.015778	1.17313	3.69927	5.44058	0.365049	0.122806	0.36328	0.278871	0.0618301	0.784363	4.15512	4.61492	1.55282	0.118294	0.0139324	1.07503	0.390792	1.90812	3.6999	3.35762	0.86042	0.354186	0.0892834	0.13059	7.30738	0.416919	0.187901	0.045296	3.06569	0.905992	0.33246	0.0881363	0.118294	0.14235	1.13126	5.09184	0.404625	7.29206	0.860761	0.863899	0.0718368	0.292863	0.369062	0.664273
NBEA	0.0513922	4.05739	20.8715	15.4668	1.89433	0.125162	0.979955	0.911071	0.573928	3.8642	1.85291	13.5619	3.6758	0.455719	0.0924286	1.3987	0.924821	1.58844	8.84214	4.39386	1.43549	0.132277	0.685628	0.016397	17.4765	7.9163	5.1163	0.10348	7.34491	3.22317	0.509995	0.201064	0.267075	0.189076	7.15651	7.46419	0.317268	15.5196	1.86388	2.29072	0.712194	0.498949	0.879168	1.24791
MAB21L1	0	38.9996	25.4018	99.5664	28.025	0.506296	15.3936	13.3783	3.38272	36.1393	1.36932	2.27663	303.134	0.155934	0.180921	1.02897	2.67584	3.46173	1.95986	99.5212	0.821445	1.06592	0.224921	0.0173393	2.7821	0.292787	0.151221	0.114947	262.067	2.6877	0.641772	0.559018	0.494761	1.67341	9.47051	14.1477	0.407395	2.09204	0.239416	1.85436	0.901367	2.57779	1.25091	0.412695
LOC109492555	0	1.22571	0.125276	0.124473	0.197093	0.125977	0.465827	0	0	0.139934	0.16326	0.444168	0.590751	0	0	0	0.00388078	0	0.250359	0.501127	0.477264	0.127087	0	0	0	0.128892	0	0	1.78529	0.269063	0.262343	0.069548	0	0	0.0653786	0.536552	0.0706509	0.299314	0.0761198	0.146895	0	0.00873441	0	0.0524848
DCLK1	0	9.317	52.4253	37.4289	5.78713	0.456011	2.26581	10.0999	6.44288	11.2228	1.64091	57.8546	4.05695	0.0552849	0.0583675	0.71069	4.51	0.304415	50.211	26.5541	0.642166	0.256758	0.868686	0.0169348	108.208	0.015787	0.00282665	0.0116298	15.0396	0.602576	1.05762	0.932656	1.3561	0.262324	0.96571	19.7478	2.32293	95.8303	0.770546	0.584088	0.354121	0.476996	0.405594	0.648049
LOC123383771	0	0.364894	7.99965	0.305709	1.12948	0	0.179464	0.0755483	0.225765	1.83296	0.267312	1.69693	0	0	0.0416024	0	0.0762501	0.194141	0.32794	0.192309	0	0	0	0	1.20552	0	0.257636	0	0	1.02795	0.143182	0	0	0	2.24799	0	0.23136	0	0.872441	1.62497	0	0	0	0.830712
SOHLH2	0	0.443124	0.735869	1.37672	0.700514	0.0939342	0.281959	1.03213	2.03843	0.278241	0.324622	1.74795	0.508661	0.0186563	0.147776	0.191602	0.150857	0.0265233	0.701912	0.891338	5.12895	8.16032	0.012305	0.013154	0.960733	0.0337831	0.00782177	0.0224491	0.750927	6.13133	0.649874	0.0553151	0.145778	0.0510941	12.7641	1.80034	0.119409	0.95224	11.1151	7.18936	0.164844	0.285584	0.191619	3.80261
LOC111559572	0	1.29883	2.10132	1.39781	1.3448	0.286521	0.592057	0.454747	0.219522	1.6311	0.974701	3.199	0.419874	0.240665	0.0957123	0.669661	2.03007	0.179783	4.07131	2.62566	0.052578	0	0.168899	0.0893357	3.61074	0.0532998	0	0.512078	0.897981	1.09004	5.49432	0.434992	1.14997	0.403057	2.49066	3.70674	0.0602577	4.33981	1.07121	1.26203	0	0.306672	0.234836	0.775908
CCDC169	0	0.535817	1.13032	0.386159	0.596163	0.15633	0.28478	0.916122	0.530428	1.4326	0.785054	0.918641	0.323997	0.219281	0.0916347	0.24912	1.83	0.232969	0.994176	1.04515	0.157317	0.629419	0.245743	0.107747	1.48469	0.025446	0.0732227	0.648282	0.223673	10.914	2.86213	0.356006	0.596069	0.414537	19.8821	1.03203	0.230142	1.95	41.7748	14.089	0.0571544	0.22389	0.25626	18.7806
SPART	0.0195724	35.7964	9.23685	13.6462	21.7088	4.86418	17.2709	8.34817	9.37131	41.3461	14.3013	8.89774	32.218	5.11861	3.18606	11.813	8.97854	8.79169	10.0294	22.7739	13.471	21.9298	10.7168	0.798373	9.05244	1.29338	0.755394	1.42543	17.4445	14.3128	16.1115	10.0753	12.6173	8.1168	31.2324	19.2871	4.3764	6.47161	36.2449	18.0334	20.0859	9.42385	14.7666	16.3888
CCNA1	0	14.193	8.1096	4.95712	3.32551	1.03675	4.14294	0.305303	0.139133	18.3562	0.459107	10.9966	11.8348	0.214876	0.0236421	0.770432	1.20688	0.0555725	9.74893	5.34809	2.32948	6.89318	0.368528	0.158676	12.2249	0.0775316	0	0.0725453	10.5606	70.0041	1.08492	2.43897	2.77682	0.223966	153.644	13.1714	0.728978	11.1279	193.654	71.2152	12.7386	0.828255	7.44688	54.2133
LOC123383802	0	0.286183	1.10991	0.15345	0.253099	0.0808875	0.0781955	0.00877807	0.0148735	0.126587	0.0116473	0.659954	0.120416	0.0166601	0.0338067	0.0100827	0.0919185	0.100494	0.100023	0.185461	0.190777	0.124343	0.00706396	0	0.23637	0.133216	0.00740893	0.000744937	0.46381	3.73673	0.0124774	0.0595404	0.0337634	0.0101144	8.8061	0.199049	0.0352827	0.512489	2.32058	2.36889	0	0.0170364	0.589301	0.642784
SERTM1	0	11.6388	26.4859	1.0753	0.0483706	0.0247339	1.91525	0.00603939	0.0379004	11.6352	0	169.936	14.7261	0.00654987	0.00374144	0.0630637	4.22341	0.0387994	51.7647	24.8237	0.195607	0.0900046	0.0243003	0.0422125	100.592	0.0575138	0.0695101	0.00102505	125.027	0.727469	0.0343382	0.341369	0.188616	0.36464	2.37469	16.1809	0.0624209	123.306	0.39044	0.661581	2.85751	0.454443	6.58172	0.185484
LOC109497469	0	2.06994	2.53602	0.622535	1.05614	0	0.469868	0.0769219	0.0788124	2.79943	0.554065	3.83463	1.28131	0.110239	0.0748843	0.152995	0.277273	0.116484	1.25213	1.98323	1.53874	3.86066	0.0442151	0.0118164	1.1836	0.0669748	0.0562114	0.0615483	4.17007	8.45455	0.187438	0.248452	0.289003	0.116488	27.1394	0.84338	0.176675	2.94048	9.90504	8.5136	0.921398	0.22856	2.31152	4.29366
RFXAP	0.124949	55.7913	33.7768	64.0804	36.4208	15.0772	31.5296	15.3532	9.29566	62.913	29.876	49.3595	89.9193	15.0005	3.47942	39.3541	19.7734	13.1012	33.0945	69.5225	49.4798	12.9934	18.2304	5.45623	56.8061	11.2399	6.70048	14.3094	69.1447	34.0714	30.6725	38.111	44.5352	17.7811	69.6964	47.38	30.3548	40.9879	55.3178	31.7905	124.201	39.8266	67.0173	35.4774
SMAD9	0.000240126	4.85328	3.17258	5.63586	3.93036	1.08579	3.49794	11.6159	4.06564	3.45661	0.429438	4.96397	9.64942	1.63972	0.0933816	3.4196	1.88926	0.123489	3.25061	12.3957	1.77651	0.0837543	3.44171	0.0105997	3.66198	0.0234682	0.00420195	0.0201464	8.99049	2.625	2.5174	2.10334	1.48121	0.712617	7.43931	7.37053	0.890524	3.71877	1.4341	2.20078	0.23615	2.04183	2.97974	1.33688
ALG5	0.314686	16.4983	9.90662	11.4663	24.4234	14.0636	20.9081	15.5395	14.2607	14.9035	7.705	18.434	37.8093	16.6102	8.44693	20.7706	17.8712	3.39977	14.3726	26.6425	22.9254	36.9486	21.2409	15.0681	14.277	6.93174	4.38152	13.6283	15.3425	11.1667	18.215	16.9673	15.1938	21.3496	18.7387	11.2845	15.3582	13.2951	12.564	16.3478	23.5578	19.5161	17.3494	17.9175
EXOSC8	0.333582	24.4856	4.28083	8.39653	9.65149	9.02764	19.2465	12.8075	5.87569	36.5118	9.79148	3.8448	26.184	15.5598	2.27324	10.9627	13.2067	6.47832	6.06185	21.1576	23.957	76.3147	9.23518	0.6749	3.5508	5.27426	4.14451	23.4951	11.3101	33.5135	10.565	8.93569	12.3049	11.4025	77.039	4.98951	12.4672	2.77598	49.9827	42.1482	58.4126	16.0883	20.2759	35.85
SUPT20H	0.00533968	8.44072	1.35937	3.001	3.46354	1.25466	6.17775	2.10674	0.595151	10.0159	1.47639	1.96565	3.56641	1.32141	0.384375	3.46239	0.912306	0.495054	1.279	3.08195	3.34821	2.02388	2.53897	0.176125	1.98621	0.62756	0.393779	1.03143	4.36976	7.49289	2.48938	2.83159	3.6585	1.13477	16.0773	2.14553	1.59608	1.80027	14.5033	7.49729	7.45075	1.42921	4.59957	5.05807
LOC111559720	0.00212198	0.438262	0.71445	0.218691	0.492247	0.193239	0.186449	0.0375053	0.120394	0.308211	0.0898968	0.145581	0.205796	0.0265703	0.0364761	0.126333	0.0735705	0.130579	0.275715	0.201103	0.263897	0.705859	0.0973599	0	0.101354	0.119824	0.0711707	0.00513359	0.267368	1.32106	0.194878	0.890813	1.08183	0.0540882	4.59426	0.145612	0.133382	0.353172	0.642668	1.22151	0.101444	0.0753476	0.194931	0.40873
LOC123383839	0	0.106638	0.652731	0.277951	0.188619	0	0.209788	0.0785011	0.123159	0	0.10416	0.377841	0.148068	0.00798155	0.00810534	0.0683096	0.0198076	0.208033	0.734759	0.144873	0.125605	0.0347494	0.031586	0	0.176152	0.0897091	0.0250974	0	0.175234	3.71222	0.195272	0.754321	0.709692	0.031658	10.0525	0.342322	0	0.381927	3.26598	4.40254	0	0.0487601	0.351336	3.82014
POSTN	0	64.3921	0.197104	0.781897	220.273	19.1639	136.193	73.7339	323.589	30.4875	18.021	0.913055	43.4439	0.129374	6.18276	100.244	5.66778	0.483025	0.0190025	33.0836	13.7597	8.03182	0.0927676	2.6318	0.659246	0.0138963	0.0139957	0	10.053	0.95197	39.68	80.0603	107.982	36.7878	1.75515	0.12981	42.8044	0.828859	3.23513	5.17442	6.31648	49.0314	0.809821	3.12716
LOC109497540	0	7.81887	0.647516	0.303846	36.7588	2.47139	19.0462	17.6072	94.0964	2.99175	3.20278	0.301467	8.85298	0.0437611	1.24937	14.8874	0.661329	0.134643	0.156854	4.88665	2.44941	1.25404	0.04071	0.121749	0.20181	0.091764	0.0246454	0	1.98428	0.737501	8.30709	13.7344	13.0116	9.76326	1.79028	0.134463	4.07088	0.433649	0.498719	1.63141	0.100995	4.93549	0.0215631	0.842612
TRPC4	0	1.16411	3.37395	0.192262	1.09595	0.198123	0.278572	0	0.00309784	1.08464	0.0550191	16.3408	0.844335	0.0578526	0.0535171	0.0691576	0.283365	0.0910169	1.69869	0.370198	1.2197	1.68817	0.0229408	0.00185785	2.49675	0.0355393	0.0088379	0	0.885119	1.36391	0.282423	0.261723	0.301032	0.670086	1.57718	0.729307	0.291668	2.61001	1.04535	1.33058	0.0206954	0.357025	1.97954	1.10646
LOC111557024	0	0	0	0	1.549	0	0	0	0	0	0	0	0	0.0327736	0	0	0	0	0	0	0	0	0	0	0	0	0	0	0	0	0	0	0	0	0	0	0	0	0	0.0563165	0	0	0	0
LOC109497541	0	0	0.0578404	0	0.272997	0.0872468	0.0379544	0	0.0190986	0	0	0.205075	0	0.0115521	0	0	0	0	0	0	0	0	0	0	0.254953	0.11361	0.108974	0	0.427991	57.3313	0	0	0	0.049093	60.7185	0	0.660554	0	71.6957	60.5688	0	0.0211718	0	51.7486
LOC109492556	0.0145656	0	0.0676424	0	0	0	0	0	0	0	0	0	0	0.128343	0	0.173433	0.0251451	0.032011	0	0	0.00966368	0	0	0	0	0.0569413	0.0637206	0	0	11.7314	0	0	0	0	24.8873	0.173826	0	0	12.0836	11.9554	0	0.00707421	0	13.8011
UFM1	4.2482	125.835	49.4701	89.6086	96.2502	29.8848	72.8839	67.8463	56.1689	142.182	30.2406	92.7706	144.683	73.1118	17.4075	61.4434	83.0044	22.2683	73.5526	130.841	67.6151	106.133	64.1949	18.4928	82.4575	22.5656	15.6273	61.0426	86.7981	33.7145	71.1523	73.0324	77.6914	64.5864	66.0074	113.689	33.5751	69.6728	49.2706	39.3924	88.2269	82.3703	70.4006	37.8091
LOC123383852	0	0	0.132098	0.118127	0.280567	0.0398515	0.0433409	0	0	0.177066	0	0.0468359	0	0.197873	0.0160753	0.0677393	0.00982112	0.0250056	0.0633587	0.0594472	0.135879	0	0	0	0.116454	0.0815469	0.0497757	0.00165157	0.173771	1.2058	0.110652	0.0440014	0	0.0358786	1.42704	0	0.0335244	0	0.963185	0.480554	0.116558	0.0483531	0	0.237976
LOC123383855	0	0	0.0455586	0	0.215029	0	0.0149476	0	0	0	0	0	0	0.0682433	0	0.204419	0.0275206	0	0	0	0.07485	0.00495187	0	0	0.100408	0.0767025	0	0	0	2.59301	0.119257	0	0	0.00773372	2.51432	0.0585379	0.0192701	0	0.581328	0.87363	0	0.00476463	0	1.23588
FREM2	0	5.09172	1.04867	0.875568	0.924969	1.48556	6.83556	0.0233378	0.0292914	4.57579	1.84292	1.20995	2.65352	0.237827	0.138521	20.1245	0.370732	1.97373	0.591546	0.389367	2.06111	0.0622795	0.0171708	0.00806637	0.969568	0.0474976	0.0170543	0.00237663	1.09327	5.09272	2.57612	5.19138	4.04215	0.603577	7.10021	0.234942	0.313191	1.0446	5.12339	3.89759	0.0479225	0.66291	5.01358	2.44797
STOML3	0	0.0337353	0.265493	2.58141	0.119341	0	0.0663675	0	0.0041745	0.317741	0	4.3816	0.0431161	0.0643876	0.0259622	0.251217	0.058746	0.0239317	0.166754	0.108455	0.0316079	0	0	0	0.111453	0.0478912	0.0357286	0.0102742	0.5457	1.08613	0	0.0210559	0	0.0150228	3.50347	0.324886	0.0213898	0.0679638	1.41154	1.97716	0.0836644	0.0231383	0.0416802	0.688565
LOC111557022	0	0	0.33565	0	0.792105	0	0	0	0	0	0	0	0	0	0	0	0.0935796	0.397106	0	0.0629374	0.0959047	0	0	0	0	0.376733	0	0	0.551921	1.4418	0	0	0	0.170933	2.10202	0	0	0	0	0.518368	0.740409	0	0	0.0703111
PROSER1	0.00777225	67.8292	9.27173	61.9818	54.4403	18.8787	42.0879	15.5656	0.911739	79.3148	23.3545	32.1934	28.2027	14.7809	2.90344	56.4639	12.4053	2.30596	26.1087	24.7464	28.1266	8.88549	18.4194	0.741566	35.6581	3.76131	1.50457	20.0177	69.1627	22.3325	43.8021	33.8519	46.1893	13.2786	28.9493	33.7743	21.5302	34.0856	33.1791	21.6134	113.817	12.6896	44.7873	24.0802
NHLRC3	0.0716207	27.5364	18.2588	25.642	23.2724	4.9747	18.3276	13.648	10.6773	26.1128	10.4113	19.4464	20.9776	8.94291	4.07138	18.7504	14.3749	3.10716	16.8749	24.316	16.8792	2.91068	24.8004	0.987116	29.5883	4.18346	2.3723	7.06953	22.9581	14.3307	11.7504	11.4711	11.7967	11.9728	22.4417	18.027	9.61947	20.6126	20.1603	16.7857	23.3449	11.8212	18.3422	14.2892
LOC109492559	0	3.86941	0.691581	0.631737	0	0.471115	0.819785	0	0	1.79419	0	0	0.29306	0.227237	0	0.800797	0.00829306	0	0.454757	0.460147	0.85416	0.00484964	0	0	0	0.112678	0	0.0055784	0.220102	1.9645	0	0.148621	0.108049	0	0.838268	0	0	1.27924	1.74865	1.21736	0	0.0956585	0.0735489	1.12158
LOC111559741	0	1.75386	2.44048	1.57587	0.701368	0.0431057	0.873843	0.0421012	0.126442	2.03016	0.0558625	0.0607924	0.0231014	0.0741972	0.0121716	0.102579	0.0324004	0.0513902	0.616791	0.2347	0.803462	0.45846	0.027104	0	1.05809	0.0416972	0.0215361	0	0.159767	0.34371	0.143625	0.161821	0.124566	0.0194041	0.465308	0.044062	0.159552	0.860296	0.135439	0.297656	0	0.0298865	0.0753706	0.0670458
LHFPL6	0	63.2319	32.9871	81.6354	181.637	23.9655	25.9127	94.4835	106.218	45.9352	58.8707	21.4547	111.005	15.4139	2.20872	92.9201	32.7321	4.2775	37.5666	203.85	95.8169	19.4811	25.4445	0.617019	97.0818	0.0826325	0.0178975	0.234864	39.133	4.7156	61.47	18.8431	23.8325	7.11468	5.58101	21.0673	19.1701	63.5961	5.82693	7.38797	2.17932	26.8355	16.1289	9.29897
LOC123383872	0	3.03658	6.45083	2.47254	5.8928	0.0672136	1.00764	0.581989	0.625881	4.73228	5.68863	0.364585	0.0329042	0.0948143	0.217944	2.60137	0.0911037	0.822402	0.349353	0.322643	0.414276	0.01602	0.0264142	0.00271506	1.01228	0.0942561	0.0129157	0.0182131	0.459351	1.40058	1.36381	0.622246	0.904756	0.019783	3.32451	0.0704665	0.22037	0.270253	0.343646	0.652579	0.120977	0.0236591	0.813624	0.172324
COG6	0.0171914	20.1247	16.1071	16.15	16.2288	5.98846	12.9363	11.7513	10.3098	22.5763	8.02673	13.7865	37.3283	7.79541	5.49396	14.7942	9.38369	6.86212	12.3362	21.6546	20.5579	28.5411	12.9294	1.76495	16.2119	6.97726	4.77228	8.39217	19.471	18.8034	14.0704	20.7065	21.5262	12.8811	38.7031	12.6082	7.01777	14.0721	23.5529	20.938	18.7799	11.1229	11.4196	17.1033
LOC109497589	0	0.150283	0.329872	0.254214	0.0303793	0.0145633	0.083416	0	0.00212531	0.094364	0.0377464	0.0798731	0.0471542	0.0205683	0.00685365	0.15059	0.0219828	0.0498784	0.0771792	0.290563	0.521844	0.07853	0.0021462	0	0.085114	0.0916588	0.0833709	0.00472778	0.0740866	0.996205	0.060655	0.0669993	0.0506574	0.0177551	1.15132	0.0206756	0.0796324	0.0749698	1.08382	0.899052	0.149082	0.0337415	0.384613	0.181347
LOC109497583	0.00160451	0.126755	0.28874	0.549721	0.0879228	0.0309091	0.0537848	0	0	0.121727	0.0691883	0.0396285	0.0263533	0.065109	0.0121848	0.155229	0.0392984	0.0608281	0.12062	0.136576	1.17791	0.140721	0.00441705	0	0.131378	0.100883	0.0965159	0.00943255	0.0520733	0.806192	0.0390102	0.0806656	0.171423	0.0578688	1.02078	0.0813806	0.213529	0.17358	1.1019	0.642831	0.139714	0.0665311	0.276365	0.108482
LOC109492560	0	0	0	0	0	0	0	0	0	0	0	0	0	0	0	0	0.0105848	0.01078	0	0.00427133	0	0	0	0	0	0.0575268	0.0214586	0	0.0374569	11.4851	0	0	0	0	18.2065	0	0.134891	0	18.0212	10.6262	0	0	0	11.1945
LOC109497596	0.00426008	0.576302	1.67338	0.432457	1.20611	0.323288	0.131983	0.0595075	0.0457275	0.370152	1.67907	2.35567	0.244893	0.160685	0.0945458	0.346621	0.391465	0.119371	0.573291	0.203103	0.858988	0.995393	0.0322507	0.00783541	1.39527	1.98691	1.12908	0.106566	0.281937	1.62794	2.21649	0.756465	0.614834	0.241802	2.84704	0.771074	0.562051	1.19943	0.805407	1.15396	1.77473	0.268457	1.41318	0.398194
LOC123383877	0	0.0912234	0.615358	0.039629	0.322709	0.0114594	0.0124627	0.00559617	0	0.0254577	0.178208	0.107742	0	0.0656231	0.0496917	0.0194785	0.0935476	0.0754991	0.0364378	0.0356127	0.544299	0.569758	0	0	0.0669733	0.619265	0.254057	0.00284946	0.0249841	0.854585	0.175	0.075916	0.0183972	0.0361093	1.40648	0.0390454	0.147813	0	0.166179	0.514605	0.268132	0.0103287	0.200368	0.0222796
LOC109497598	0	0	0.0735	0.0438176	0.0693814	0.0110868	0	0	0	0	0.0718391	0.156358	0	0.190101	0.0346595	0	0.0054645	0.0278264	0	0.0151601	0.435771	0.148593	0	0	0	0.5486	0.36004	0.00183787	0.0725152	0.591979	0.123135	0.0428444	0	0.0548981	0.661676	0.0377758	0.596899	0	0.107184	0.331075	0.324267	0.00461208	0	0.0461897
LOC109497600	0	0	0.146224	0	0	0	0.0959508	0	0	0.979997	0	0	0	0	0.0444857	0	1.07354	0.0691987	0	0.095964	1.28474	3.15483	0	0	0	0.738546	0.550983	0.255944	0	1.57028	0.765528	0.121766	0	0.173754	4.80759	0	0.0618487	0	0.53309	1.03503	0	0.129986	0.482073	0.168468
FOXO1	0.106672	34.3585	19.1612	21.0709	54.6764	37.356	13.2439	21.6638	3.86185	24.4337	39.2344	37.8311	48.4193	12.5904	14.7514	42.1034	30.8585	8.46343	22.8135	45.1773	28.3098	22.0025	18.4728	1.00245	25.2818	30.6222	19.8987	22.4289	31.3802	37.4426	115.641	42.8639	44.171	13.8792	51.8978	31.0698	24.4827	27.8375	30.0463	23.5135	25.697	29.9586	94.0869	18.9075
TRNAR-UCG	0	0	6.77618	0	1.23009	0	1.36815	0	0	0	1.01893	0	0	0.520522	10.7041	1.33646	0.0484412	4.31677	0	0.0488691	0.148934	0.849828	0	0	0	3.65653	1.96409	0.162922	0	5.87745	3.27466	1.73624	1.26226	0.176966	15.5055	0	0.440945	0	0	1.59523	0	0	0	0.109189
MRPS31	0.0172132	28.0766	20.0133	28.8244	15.5605	4.93244	15.4758	9.52184	8.36728	26.0676	21.8574	22.417	19.7651	11.0332	6.45117	15.5321	11.8028	7.59198	25.5567	14.539	13.2201	15.941	11.041	1.37918	25.0174	4.61651	3.16275	7.78651	23.4835	9.36779	12.6963	9.56912	11.6693	10.3626	16.6572	22.8727	6.32913	19.2037	13.711	11.7725	19.97	7.63359	13.8854	10.8624
SLC25A15	0.000486881	4.25358	4.69795	2.47351	2.46254	2.58695	3.9956	1.47944	1.00118	4.80376	4.8929	2.30881	5.85478	2.59268	48.1704	1.7508	11.5	2.80989	4.08987	2.21335	27.1085	30.5809	5.2484	0.311635	2.37702	0.15227	0.0979791	2.3821	1.52437	2.70616	1.74721	2.56261	3.01153	5.80055	8.87129	2.37939	0.46958	2.31352	3.15922	4.77348	1.217	1.92639	2.39471	2.33317
LOC101096867	0	0.165967	1.50989	0.159825	1.14893	0.103524	0.140735	0.000789932	0.012039	0.179676	0.268322	0.247136	0.107278	0.0284854	0.850034	1.19879	0.126168	0.22786	0.614638	0.318508	2.65837	3.17013	0.00826385	0.0033977	0.340332	0.0565701	0.016163	0.0044244	0.278606	4.17799	1.14978	1.29664	0.976425	0.0644411	15.5989	0.435407	0.0707586	0.199847	7.07234	2.92803	0.208166	0.30146	0.654047	2.27377
THSD1	0.0117686	2.60684	2.31139	1.24898	3.86395	3.54147	3.28671	0.361914	0.237986	1.90013	2.46393	4.06324	4.24959	0.680403	0.16965	10.2879	1.06112	0.720154	1.15231	1.82426	6.8914	7.30646	0.0917937	0.0324685	3.10668	0.0549531	0.0300328	0.102425	1.55398	1.48563	4.85465	5.30596	4.19938	0.546799	2.71231	2.85284	1.08409	2.65242	1.58571	1.81423	1.57733	3.98522	3.78759	0.690975
LOC111556783	0	0	3.04059	1.29477	7.17554	1.31041	0.427546	0	0	4.36675	0.424555	0	1.09732	0.347015	0.165186	10.0234	0.968825	1.43892	2.08338	1.66969	7.29158	0.0472127	0.128744	0	1.91465	0.975074	0.818372	0	0.357125	7.2302	1.36444	3.97889	2.10377	0.368679	20.402	3.34871	0.551181	0	3.16718	3.39141	0.958176	0.953977	5.72816	0.636935
VPS36	0.289983	100.307	78.9767	125.607	60.4841	41.2639	42.9389	44.2613	23.1914	93.2089	86.2981	126.638	77.3618	27.9312	12.0983	87.3101	55.724	175.243	109.658	69.3429	33.7019	24.2821	47.0665	1.3043	142.788	13.4215	7.91146	20.7102	139.134	30.235	84.1293	64.7781	69.4777	40.1843	28.5306	101.838	18.6236	134.676	21.6358	21.6717	75.6972	51.6178	38.3837	20.1034
CKAP2	0.00562828	16.0299	1.8035	3.68542	1.02898	1.62364	7.97239	6.20262	0.550001	21.8997	0.822151	1.39851	4.82817	7.51786	0.140906	2.12725	0.368705	0.271564	0.943087	1.96815	4.26846	30.2243	14.101	0.0188216	1.55012	0.537399	0.443201	3.46247	1.54203	9.16025	1.36508	4.71792	5.56812	2.21081	24.8651	2.38957	1.21711	1.30292	14.3629	8.13619	19.53	2.91497	0.75204	6.03747
NEK3	0.00262985	2.44012	2.17086	1.61772	2.36698	1.39778	1.45656	1.54514	1.66953	2.55276	1.47124	2.43572	3.13619	1.56445	0.512053	2.3368	1.78876	0.338111	1.34363	3.78345	2.74981	6.67347	2.19815	0.119716	2.3754	1.36993	0.92327	1.85036	4.37292	2.19847	2.01728	3.33839	3.29027	2.15716	1.85714	2.79717	1.2527	1.96964	1.80605	2.95601	3.26655	1.59052	3.44761	2.85576
NEK5	0.00384512	1.46412	1.38187	1.91134	1.58505	0.781732	0.879074	0.239159	0.149013	1.11789	0.390317	2.40296	2.31497	0.286852	0.118282	3.37658	1.26212	0.291542	1.38203	1.48771	5.27681	2.63259	0.323811	0.0949925	1.43825	0.12071	0.0779901	0.121674	1.74707	1.14316	0.983299	1.13012	1.2786	0.515172	3.05558	1.81779	0.590501	1.43264	2.25854	1.25728	1.40551	0.948392	1.92667	0.805755
ALG11	0.226522	10.4443	14.0618	14.7886	9.75687	6.00765	8.81677	7.12077	4.50308	10.4802	4.83529	11.0045	16.3951	6.46914	3.29483	8.29211	6.54573	3.06771	8.23884	17.2161	10.5229	32.9965	7.65442	1.00311	13.8272	2.28167	1.59806	4.68238	18.9614	8.32257	8.13206	7.76575	7.8203	8.47264	13.2947	14.1559	3.95648	12.2528	7.19094	7.76129	9.43891	8.43836	7.98297	7.15982
ATP7B	0.00104262	0.882344	0.723265	0.860557	0.674405	0.177721	2.47759	0.14356	0.070613	0.924174	0.160906	0.620167	2.42068	0.192966	1.17649	0.37399	0.221015	0.0741838	0.254491	0.781076	0.631645	0.056937	0.154753	0.00990792	0.570026	0.12726	0.138357	0.132701	2.07039	4.61668	0.215045	0.181107	0.185164	1.12961	6.86923	0.939427	0.0931845	0.60012	7.53607	4.88749	0.284822	0.243274	0.678428	2.74539
CCDC70	0	0.106991	0.862058	0.41831	0.37849	1.14913	0.052621	0.0886068	0.0264788	0	0.195948	0.284321	1.9853	0.156157	0.0487934	0.205609	0.439697	0.132824	2.18755	0.233068	0.24345	0.769203	0	0	4.06494	0.123759	0.075542	0.0250649	2.30758	294.023	0.377845	2.70453	1.55356	0.22461	339.614	0.154556	4.69776	2.29916	648.37	444.127	0.353788	0.232729	0.264377	333.959
LOC123383032	0	0	0.288951	0.645977	0.340949	0.29057	0.25281	0	0	0	0.658983	0.170747	2.72516	0.028855	0	0	0.0984621	0.0455809	0.461968	0.442478	0.309605	0.04711	0	0.0381465	0	0.0810795	0	0	0.158377	0	0.70595	1.84476	0.699734	0.506853	0.150797	0.495027	0.122218	0.345187	0.526716	0.0991661	0	0.216571	1.90524	0
TMEM272	0	0	0.529581	0.111167	0.387251	0.033753	0	0	0	0.0999795	0.641549	0.105783	0	0	0.0442498	0.344239	0.0249546	0.00176492	0.0715505	0.0405597	0.64789	0.181602	0	0	0	0.108834	0	0	0.147179	0.25632	0	0.0496905	0.216752	0.0202587	0.3814	0	0.0504785	0	0.978947	0.535007	0	0.0312027	0	0.268744
DHRS12	0	1.49896	6.02795	5.2702	8.15796	2.50399	0.855369	0.530508	0.466091	1.81002	1.14034	6.25593	2.80907	0.664529	1.20397	4.41322	1.73548	0.668005	13.8602	2.06816	3.79248	1.89434	1.24232	0.0541939	8.19016	1.57625	0.759841	1.11741	5.87376	5.98222	3.34811	3.88623	3.71478	1.43526	10.52	2.79459	2.82077	6.71072	5.10677	7.29749	8.70582	2.14847	1.80448	2.7638
WDFY2	0.0515522	14.9696	15.3791	12.606	30.9844	20.0625	10.3847	13.7158	8.45976	13.7594	14.2293	12.2474	14.5459	4.21895	7.13859	19.1361	11.7712	7.77255	8.87413	22.2496	10.7886	1.29366	16.6382	0.126424	9.80742	6.17717	3.71584	5.0134	20.0864	23.5969	29.2018	29.0535	25.919	7.10013	44.2369	19.8362	10.6744	12.1619	18.0659	23.3354	12.0124	13.4562	12.9449	18.9538
LOC102900676	0.000485914	1.39397	2.69813	1.13508	0.85738	0.423778	0.735934	0.231886	0.125179	1.47456	0.357306	0.868086	0.548401	0.36168	0.337769	0.798443	0.28154	0.490167	1.5847	0.606485	0.812733	0.251734	0.451463	0.0294929	1.18366	0.615467	0.380509	0.423478	1.62709	5.30383	1.05144	0.894474	0.879805	0.469251	11.123	0.721967	0.285388	1.12009	7.23758	4.67297	1.11005	0.247091	1.06512	2.46058
LOC123383941	0.224733	0.374303	3.15384	0.370349	0.175925	0.0234265	0.47523	0.0183045	0.0328201	0.582887	0	2.27878	0.209917	0.0167498	0.0773559	0.286705	0.0150105	0.071733	0.978203	0.531942	0.91598	0.113086	0.0294602	0	2.13586	0.15284	0.117041	0.0034485	1.03172	1.7404	0.156111	0.35695	0.210613	0.042182	4.62632	0	0.0472971	1.38036	0.708659	2.10928	0.399597	0.0188411	1.05148	0.516314
LOC111556827	0	0	1.07538	0	0	0	0	0	0	0	0	0	0.217333	0	0	0	0.0399758	0	0	0.0403288	0.614535	0	0	0	1.89606	0.120701	0	0	1.06097	0.923871	0	0	0	0	6.3979	0	0	0	0	1.62388	0	0	0	0.180215
LOC123383942	0	0.55719	2.06286	0.565837	0.134393	0.0286337	0.292724	0	0.0376081	0.127223	0	0.572084	0.0287728	0.064452	0.093846	0.0973426	0.30255	0.0628836	0.10607	0.250336	0.420354	0.118308	0.0337581	0	0.836736	0.101205	0	0.0272933	0.452604	3.88687	0.159009	0.126462	0.0459694	0.0386686	6.68197	0.146345	0.112409	0.442206	3.26997	3.45501	0.293118	0.0277937	0.699049	1.35733
INTS6	0.281851	26.4363	17.3362	28.134	18.1293	10.0376	19.6392	8.97596	6.82417	30.7908	11.6523	18.0417	28.6946	7.7291	3.78217	21.5158	12.0198	7.27279	15.6615	21.5084	21.0089	11.5337	13.4531	0.974487	16.3237	15.3135	9.99049	11.8624	27.1027	41.1484	22.096	23.4975	22.7584	9.51098	71.1813	13.4689	11.609	12.9319	68.168	43.5239	44.2752	15.044	16.5029	36.1999
SERPINE3	0	0.854553	0.793661	1.21919	1.59367	0.362299	1.02788	0.289752	0.119537	0.536581	0.374254	0.506017	25.5563	0.573564	0.221335	23.3838	1.05526	0.243805	0.759662	1.07371	0.646498	0.162692	0.35698	0.0344661	0.552372	0.556753	0.347589	0.384725	3.94376	1.54386	0.605036	0.585546	0.665942	0.413634	2.91571	0.465158	3.29219	0.199605	1.42769	1.19047	1.01358	0.477995	0.240999	1.27024
LOC123383944	0	0.0163606	0.0674435	0.0296984	0.0325556	0	0.00502908	0	0.00101225	0.0359553	0	0.0163038	0.00154888	0.00065054	0.00116582	0.00786015	0.0290597	0	0.0202176	0.0074728	0.948745	2.44475	0	0	0.0135128	0.0443008	0.00866361	0	0.0126022	0.119339	0	0	0.0037119	0.0010408	0.496762	0.0118169	0.00778003	0.0604271	0.033529	0.0980649	0	0.00383368	0	0.0213524
LOC105260724	0	7.78447	5.48554	41.4769	7.60717	1.02313	2.88225	0.737337	0.147861	4.92103	0.836741	36.3067	4.16563	0.360373	0.458789	10.3502	1.73072	0.296059	6.98033	18.0083	5.64293	3.68191	4.55557	0.0156487	13.2363	0.236522	0.0248139	0.0238765	10.4603	0.558675	4.09575	1.48063	1.22793	0.688609	0.866052	21.2381	4.88559	17.7006	0.852286	0.663702	0.232423	1.06175	14.4809	1.08702
FAM124A	0	3.48023	3.84245	22.415	5.24527	0.829226	1.59451	0.737086	0.131894	2.54525	0.672383	19.8666	2.91461	0.383175	0.493645	5.87857	0.978714	0.174233	4.32035	6.57145	2.80891	1.05931	4.04923	0.00798989	6.72263	0.226431	0.125428	0.0805857	5.36732	0.410259	1.97292	0.929016	0.876924	0.551356	0.474815	10.7029	3.04116	9.67379	0.479901	0.353678	0.142404	0.540291	9.80017	0.695382
LOC123383960	0	0	0.152254	0	0.78598	0.057415	0.0249769	0	0	0	0	0	0.00961566	0	0	0	0.145032	0.108078	0.182565	0.0285489	21.6347	108.864	0	0	0	0.202931	0.071713	0	0	0.367882	0.179347	0.126788	0.0921757	0.348914	0.0595934	0	0	0	0	0.0979734	0	0.0617018	0	0.191362
CA1H13orf42	0	0.51219	0.0225819	0	4.18338	0.0510941	0	0	0	0.0756726	0	0.080065	0.0456376	0	0	0.347397	0.0545643	0.117553	0	0.052929	1.49693	0.500714	0	0	0	0	0	0	0.0371323	0.181878	1.86793	0	0.328112	0.0153334	0.335873	0	0	0	0.144073	0.300312	1.24534	0.101552	0	0.0851473
LOC102900780	0	0.728951	0.0447835	0.0444968	2.62451	0.0427827	0.0715073	0	0.00394327	0.0400188	0	0.0529271	0.0558123	0.00238514	0	0.260267	0.0360698	0.404791	0.0286395	0.06242	1.90702	0.665889	0	0	0.02632	0.0888014	0.0112499	0	0.0441834	0.197179	4.09829	0.179006	0.260278	0.0283813	0.38563	0.030689	0.0101025	0	0.225854	0.317378	2.94387	0.125363	0.255915	0.155101
LOC101098598	0	1.42996	0.449454	0.618337	2.31512	0.0651883	0.467915	0.00636692	0.0228319	0.318604	0.168961	6.03711	0.052404	0.0155365	0.00525914	1.39616	0.356647	0.971461	0.549296	0.191243	2.18811	0.871822	0.0102473	0	0.228592	0.15037	0.0488533	0.0226934	0.0852754	0.501226	14.5164	0.748556	0.627931	0.129117	0.784874	1.11058	0.0292472	0.619532	0.441156	0.612549	6.13936	0.372876	0.626902	0.311421
RNASEH2B	0.292082	10.7899	3.40647	2.8935	6.76015	5.05693	8.14781	7.05822	4.65929	10.6742	2.81649	5.37909	12.396	3.13679	0.490654	7.66446	2.73086	1.11042	4.61733	8.65567	16.1153	7.25184	5.91431	0.84529	4.87385	4.81562	3.07638	23.5788	7.17225	4.10762	3.73053	5.70666	7.95509	5.47382	6.31401	3.19663	8.72293	3.74387	5.96548	4.86271	75.3425	8.62279	7.08341	3.59139
DLEU7	0.0153878	0.286029	0.142922	0.0532526	0.252962	0	0.164122	0	0	0.478934	0	0.570076	0.216632	0.0142724	0.00543515	0	0.0265645	0.0338181	0.34275	0.432137	0.280753	0.031069	0	0.0141511	0.31499	0.0601558	0	0.00223361	0.205635	0.0959261	0	0.0595084	0.0865262	0	0.223763	0.459098	0.0604521	0	0.0651315	0.0797061	2.28571	0.0392362	0	0.0449083
LOC123383970	0.00159571	0.562964	0.602608	0.107099	0.847909	0.0169364	0.16909	0.0186095	0.00741487	0.158779	0.00724304	0.0314494	0.13615	0.0168187	0.0255339	0.195761	0.0205562	0.159406	0.24234	0.190535	0.957092	2.20072	0.0066558	0.00444688	0.0494917	0.180654	0.010577	0.0372004	0.313865	0.578766	0.0352694	0.0374001	0.225407	0.0571798	1.58211	0.353457	0.11398	0.643836	0.259318	0.502578	2.13004	0.0587127	0.0740335	0.145825
LOC123383991	0	0.505756	0.692436	0.436907	0.799153	0.0457433	0.119397	0.0819086	0.0400535	0.270992	0.0197603	0.519683	0.255365	0.0918604	0.0468988	0.311017	0.0497896	0.0143513	0.36363	0.267732	0.303272	0.175795	0.0449415	0.0240211	0.490129	0.433978	0.0904634	0.198105	0.698118	0.434217	0.105843	0.252534	0.220313	0.0703543	0.633052	0.909188	0.218058	0.47096	0.866043	0.733734	3.61234	0.118932	0.116641	0.194811
LOC111556929	0	0	3.13484	0	0	0	0	0	0	0	0	0	0	0	0.0317905	0	0	0	0	0	0.238857	0	0	0	0	0	0	0	0	0.897724	0	0	0	0	1.63601	3.22235	0.353588	0	1.52383	0.215172	0	0	0	0
LOC111556704	0	0	0.3234	0	0	0	0	0	0	0	0	0	0	0	1.31324	0.829189	0.0613117	0.153045	0	0.0606404	0	0.0101938	0	0	0	0	0	0	0	0	0	0	0	0.0548981	0.253163	0	0	0	0	0.0255274	0	0.0126832	0	0
LOC123383983	0.00138664	1.31023	1.93026	1.07072	2.23108	0.178485	1.02206	0.112659	0.180205	1.77218	1.06212	0.856187	0.575065	0.163419	0.957209	1.2022	0.342764	1.10813	0.474876	1.4609	1.07201	0.188806	0.0701424	0.0879889	0.752195	0.84384	0.473164	0.350424	1.42022	1.40295	0.950711	1.03925	1.12864	0.575809	2.51924	1.26801	0.755843	0.738513	0.625803	0.875981	4.6699	0.370069	0.910239	0.281254
LOC102900852	0.146874	7.3792	5.66611	5.0442	5.45447	0.810785	4.6947	0.901118	1.29257	11.888	3.47103	2.51035	1.42717	1.36191	2.56935	6.37758	1.44002	3.41208	1.06679	4.40202	2.28838	3.42763	0.999835	0.0910257	2.0098	5.5483	2.75173	2.23414	5.89741	10.0099	3.80381	5.0132	5.77218	1.9671	13.3864	5.44418	3.46204	1.40824	4.99363	4.80928	40.0029	2.20302	3.94746	1.95685
LOC109497907	0.0022151	27.9986	5.83181	7.81911	14.8995	0.752567	18.2627	1.58372	0.383826	50.1908	5.45958	5.28853	3.09246	1.42482	2.96568	11.6052	1.37091	3.84342	0.727757	7.0067	3.02855	1.26234	1.22264	0.077409	4.44365	3.16578	1.35667	4.09628	10.1787	12.9995	11.3312	14.5885	19.3684	3.46628	16.9471	10.1974	8.5586	2.45165	21.2924	10.0341	272.598	2.62637	4.9769	3.17414
KCNRG	0	4.2278	4.67683	3.59897	3.55884	0.676661	2.0167	0.302323	0.277337	5.40529	2.07101	2.87644	1.20076	0.20397	1.15424	4.11129	4.00574	1.86094	2.1516	3.25455	0.635425	0.0892179	0.478089	0.0151206	3.74433	0.733826	0.179823	0.221658	7.7609	3.61304	2.01874	1.95524	3.25899	0.604341	4.86403	2.0603	1.06579	2.39445	1.74853	1.93016	8.63226	0.791566	1.6992	0.995684
TRIM13	0.0194504	19.8368	8.85664	11.2142	5.42507	5.25928	12.6621	3.50655	1.6434	19.9927	3.40786	12.1859	33.9612	1.63853	1.30326	7.67747	6.2942	4.37297	7.85251	37.0084	11.9239	33.7049	9.46273	0.450759	11.6261	0.660262	0.382908	7.97559	36.074	81.8525	7.27312	12.5767	12.4245	9.36336	122.329	9.22689	3.73657	8.43298	139.244	69.9188	13.5692	17.7423	8.21912	70.5067
SPRYD7	0.579379	19.8159	42.4134	52.7998	19.43	10.6876	14.513	10.8151	11.1854	17.1612	15.8667	50.2108	39.0972	15.2885	6.60725	28.6297	31.3514	11.7739	71.3656	47.4861	17.4772	54.3101	21.0031	1.97497	62.8973	6.63386	4.22439	18.3785	49.567	28.8173	24.8858	28.4481	28.3	25.0965	71.7819	60.3853	13.2016	59.0787	46.9701	32.6506	34.5037	30.1817	15.1095	24.4614
LOC123383999	0	0.255531	0.852736	0.638855	0.634923	0.323287	0.179537	0.0335908	0.00602287	0.550114	0.178282	0.274855	0.147453	0.107469	0.307756	2.20978	0.0889951	0.629059	0.339011	1.13552	0.641049	0.000495645	0.0662271	0.00361206	0.422105	0.4069	0.257742	0.223775	1.40218	1.39721	0.993137	0.945544	1.04907	0.795763	3.15563	0.0937475	0.393474	0.228798	1.30504	2.06403	0.724253	0.339031	0.360811	0.233077
LOC109497902	0	0.0570515	0.15287	0	0	0	0.0090514	0	0.00113866	0.0924468	0.000741517	0.0733597	0.0104539	0.00241058	0.00568626	0.0530505	0.0121782	0.00734374	0.292178	0.0142256	1.43118	0.919659	0	0	0.44081	0.24965	0.0909585	0.00086229	0.0340225	0.246081	0.245531	0.03446	0.36744	0.141113	1.38215	0.0265854	0.440499	0.271894	0.471453	0.561465	0.912833	0.182848	0	0.144952
LOC123383113	0	0	0.183082	0	0	0	0.0400456	0	0.0403018	0	0	0.649122	0	0.0121885	0	0.469417	0	0	2.34165	0.0400511	3.06023	1.00824	0	0	1.614	0.633596	0.344934	0.00762996	0	0.327681	0.638994	0	0.886715	0.279708	1.9587	0	2.11666	0.874854	0.111244	1.12051	1.3462	0.928636	0	0.33238
KPNA3	0.598016	83.4415	58.5523	63.9917	27.1429	19.6994	42.8397	74.3329	18.5037	103.624	21.4577	87.6652	95.3059	31.5016	7.55215	28.2203	33.2552	168.765	61.6515	54.5735	11.5806	22.0374	68.5564	0.312281	87.4577	12.7025	7.97525	42.1398	84.5445	29.1996	53.9256	38.6431	51.1177	30.8251	42.3135	61.3056	14.1166	92.9531	26.4697	22.1469	65.8565	34.7422	20.37	23.4676
LOC123384019	0.10422	33.0138	24.6384	31.1907	12.8734	11.5365	25.4108	30.0595	9.90174	49.3153	9.98351	38.7178	60.8895	17.5538	4.36447	17.9162	21.7945	76.9568	37.3238	32.0824	7.81058	3.48957	29.617	0.32547	45.7345	6.83855	3.84694	24.2662	39.7263	10.6388	24.5258	16.7934	22.8064	15.8483	16.9786	28.8527	14.2748	47.6647	15.5314	10.7431	36.6336	31.5162	18.4829	13.0873
EBPL	1.91015	14.0585	11.3462	10.1569	9.15164	3.88763	17.6004	6.68013	7.29894	17.7352	2.69482	6.48156	91.2793	16.6347	7.07784	13.1702	16.7853	2.26067	7.00962	41.2364	17.6961	11.1285	4.6852	1.71628	9.32614	5.5669	3.36516	1.48001	54.8373	2.38154	8.87403	7.47687	9.07167	14.5964	4.89846	11.1207	3.14364	6.85237	2.45829	4.1778	5.57951	11.1866	10.7891	3.44273
LOC123384015	0.289545	2.50816	2.0227	0.918781	1.23935	0.247082	1.59846	0.144767	0.055922	3.91508	0.318652	0.762901	2.25458	0.168547	0.227507	1.47249	0.239346	0.30475	0.865401	3.04918	1.13161	0.132611	0.100184	0.0121931	0.856164	0.649903	0.322134	0.12634	5.45719	0.265706	0.904944	0.754237	0.772197	0.397762	0.311833	1.73476	0.444786	0.523375	0.228511	0.355765	1.34843	0.34428	1.68378	0.184504
ARL11	10.7298	5.87025	4.3466	1.4631	4.34029	1.68594	5.47158	0.148112	0.0702968	4.99391	1.17914	2.26448	4.27866	0.546854	2.00874	14.5259	3.02273	2.08217	0.936021	5.99461	3.36255	1.30612	0.0631004	0.0281058	1.66829	12.9864	8.77969	12.7127	5.78589	1.20028	1.23841	2.02894	2.52049	5.74687	0.574043	2.94823	17.1393	4.23882	0.291058	0.816898	6.26165	6.361	8.81244	0.478175
RCBTB1	0.00916074	6.11542	7.80654	5.9732	3.13566	1.0721	4.25575	2.64779	1.51759	7.49181	2.32568	5.65244	12.2132	2.92668	2.9057	2.76456	5.23302	0.942073	4.05691	9.0012	16.2238	9.10759	5.06168	0.297473	4.94023	2.41671	1.53532	3.46984	8.49159	3.28071	2.50372	1.69743	1.97164	3.35561	3.55366	8.34639	1.50159	3.58822	2.83009	3.6874	6.40406	4.13629	3.81832	3.46787
PHF11	1.66715	16.3158	6.42906	8.99063	36.7962	25.6574	24.6704	23.0947	5.94848	14.2327	19.6268	17.3626	41.2873	15.8967	6.25685	57.9787	12.4587	3.2917	19.9121	35.2701	31.2303	43.3546	21.1635	1.14039	15.8273	11.3191	7.09361	33.0352	20.6707	10.951	26.8263	23.4083	37.3486	30.6728	6.29633	15.7655	55.0228	12.4029	7.3931	12.0232	141.667	24.0639	83.7896	13.7726
SETDB2	0.00431959	1.9385	1.99635	1.93907	1.0753	0.739181	0.842453	0.488429	0.468632	2.17992	0.761867	1.59013	0.947651	0.303491	0.232238	0.868863	0.525324	0.488224	0.589318	1.2971	2.63682	1.34156	0.590109	0.0366032	1.67687	1.50573	1.25193	1.09377	2.14054	3.94456	1.03821	1.18963	1.47297	0.647611	8.91227	1.48391	0.930311	1.11948	3.21396	3.40053	4.83281	0.574199	1.54944	1.91078
CAB39L	0.0121275	3.60176	4.49991	4.84382	7.2652	1.47234	3.00899	1.81758	2.04513	3.37929	0.692558	5.36857	5.9695	2.72691	0.252442	4.52432	2.17128	0.319114	4.51739	4.86339	1.84849	3.10182	2.86103	0.156894	5.03382	1.76059	1.27547	7.35952	4.46277	5.63582	2.03768	4.2001	4.59109	2.71558	13.1223	4.10332	2.30204	4.44058	9.99168	5.67671	8.3345	3.59464	4.87906	6.28186
LOC123384025	0.00311338	1.42429	3.41824	2.92976	6.30099	0.935983	2.43989	1.06239	0.866506	2.35794	1.12819	3.04589	3.43827	1.8977	0.455818	5.11275	1.48433	0.403698	2.69879	3.00131	2.71851	0.86146	1.26919	0.113095	3.37245	2.00081	1.05557	3.43475	2.71428	4.91294	2.34402	2.29767	2.38966	1.40186	10.7977	2.28505	1.81327	2.34906	3.25714	6.13933	4.39606	2.69414	3.42012	1.86065
LOC123384024	0.00863929	4.85057	12.4905	11.674	9.29156	3.0073	4.19409	2.57576	3.22836	4.73663	16.1382	8.20125	7.30374	2.88038	1.93747	9.50943	7.49139	10.7377	9.82148	11.5924	4.0577	0.392139	3.93609	0.187013	10.9645	10.4742	6.19251	2.99617	9.35283	8.08677	6.32075	4.83164	6.58433	2.927	14.9064	9.29504	8.74088	8.05212	4.26712	6.16011	8.27839	6.71869	8.45518	3.60226
CDADC1	0.32501	9.68828	21.7963	13.6477	13.0277	3.89011	7.36966	11.2977	11.6589	9.33909	21.4432	14.137	21.7308	10.0019	5.23186	11.7621	12.8992	15.042	13.3528	15.0299	8.9818	19.1239	15.5025	0.442451	13.3846	23.2387	16.0992	14.3205	14.3538	19.8396	11.4857	8.75865	8.60527	9.70392	39.1304	12.5828	8.64118	13.7575	23.9874	22.4049	11.037	8.66501	6.40615	17.3248
LOC102901569	0.0184982	0.114615	0.998652	1.58441	1.01365	0.777482	0.415733	0.395502	1.4821	1.29542	2.39298	3.54075	1.54082	2.27227	0.200914	1.29402	4.85199	0.381129	1.18459	3.72499	0.871371	1.79742	1.45132	0.229656	3.54994	0.358563	0.526011	1.14721	0.56503	24.3317	0.494717	0.572296	0.988152	0.273426	61.3305	7.25744	0.336105	1.53937	24.7613	21.2871	1.42124	0.532314	0.920449	32.0271
MLNR	0	0.0269061	0.0100832	0.0901682	0.0237956	0.0836529	0.264662	0.055707	0.11986	0.0675783	0.0197108	0.143002	0.163024	0.00704849	0	0.0258532	0.0327976	0	0	0.0453768	0.0547403	0.00438388	0.3407	0	0.222228	0.101857	0.075989	0.301929	0.0165802	0.205737	0.0422312	0	0	3.84867	0.765654	0.0777353	0.0255896	0.325233	0.385987	0.218012	0	0.0968849	0.0332426	0.120396
FNDC3A	0.0181918	17.0255	9.58348	11.6203	8.37048	2.23208	12.8754	4.05724	4.57576	17.0437	3.14424	10.6382	11.5488	4.2391	5.79182	9.50888	7.90427	1.68511	6.57985	8.89944	4.8312	7.00746	5.17388	1.37236	12.7368	3.23139	2.01323	3.6575	10.1128	28.8348	4.89563	3.46593	4.31229	7.02874	50.0229	10.5786	3.94189	12.7922	28.3106	16.0347	12.9433	5.02271	12.7794	17.3355
LOC123383218	0	0	0	0.127724	0	0	0.0562342	0	0	0	0	0	0	0	0.013036	0	0	0	0	0.0160691	0	0	0	0	0.377745	8.5847	4.60156	0.0107144	0	0	0	0	0	0	0	0	0.289983	0	0	0.0588219	0	0	0	0.0359035
CYSLTR2	0.0435767	0.0176472	0.251309	0.185304	0.273123	0.153625	1.31296	0.0755099	0.0904056	0.00886465	0.312855	0.243859	0.17843	0.0972143	0.113175	1.32939	0.227405	0.0341139	0.112606	1.21912	0.624241	0.198396	0.214834	0.0146678	0.247783	0.256831	0.123353	0.717369	0.274041	1.46266	0.265906	0.286376	0.480457	0.513049	2.13451	0.492855	0.424628	0.246496	1.41589	1.45191	0.175062	0.512785	0.248556	1.62655
LOC109497974	0	0.601324	0.641758	0.744735	0.323708	0.199518	0.273243	0	0	0.0656655	0.0766114	0.833724	0.628688	0.0117411	0.0178848	0.0502427	0.146598	0.00927341	0.352452	1.27592	0.344341	0.90627	0.069696	0.08537	0.647813	0.109971	0.036919	0.0998357	1.86081	1.06796	0.164143	0.350839	0.0949071	0.0399171	1.63369	3.32354	0.0165769	0.842739	1.08053	1.43245	0.172904	0.139357	0	1.19451
RCBTB2	0.209985	11.5632	3.96569	4.80453	7.36925	3.71676	6.64918	3.13792	3.27134	11.415	3.53285	5.67464	12.5859	1.31657	1.49399	7.23451	2.67369	4.76934	1.89582	11.1079	9.7657	6.69635	3.06028	0.194481	5.46346	3.32008	2.86784	0.583622	7.98819	16.4543	6.40705	5.87481	9.61379	2.52468	28.8962	5.75759	3.3187	5.0628	22.3711	15.9636	17.3783	4.67164	11.4193	11.9056
RB1	0.100252	8.10411	4.89838	9.75391	4.70269	3.36711	3.12846	3.00035	1.26573	8.99111	9.32411	5.10512	7.02835	1.57001	0.744536	4.38457	2.57296	2.67008	3.53434	8.23154	4.10988	1.60715	3.42551	0.173119	4.38059	2.77212	1.84888	4.31578	9.06148	8.15023	5.29867	5.14019	5.73011	2.38615	16.0871	5.83004	2.22675	4.40283	10.3924	6.91132	16.0059	4.05808	5.18238	5.07009
LPAR6	0.421281	20.2429	4.6382	2.17201	12.8145	20.0854	15.7767	4.03426	1.80617	18.1071	8.05213	7.10174	18.0481	1.347	7.77917	13.7008	24.3649	3.34127	2.0427	25.6507	12.7764	6.91469	2.50488	1.83697	5.33847	5.73248	4.16241	1.71098	5.55867	6.41728	18.2136	26.4772	21.8356	16.0757	13.6587	6.46405	5.40419	3.74428	2.4867	5.21389	50.3496	67.0039	25.3392	8.29413
ITM2B	974.4	623.027	814.727	4627.75	2482.63	1785.33	568.959	608.272	764.1	544.066	1587.02	1979.21	3248.66	795.77	285.44	1517.47	1009.64	243.996	1653.62	1992.33	802.121	2307.18	614.288	115.101	1928.34	465.06	324.182	126.972	2488.43	746.196	2004.53	2332.92	2697.14	675.757	451.757	3194.87	939.851	1747.32	959.256	545.14	1165.95	1518.28	1718	1120.14
LOC123384061	0.0122944	0.60941	0.34257	2.255	2.15583	6.97592	0.299723	0.651896	0.15082	0.191327	1.33932	1.21459	1.52889	0.416217	0.10422	1.17112	0.711012	0.162117	2.19077	0.706586	0.391528	0.316495	0.262299	0.135676	0.629169	0.304396	0.215139	0.0571067	1.97155	6.62187	5.3804	5.18244	6.63665	1.21151	16.1349	1.46722	0.676191	2.66008	11.4484	6.17967	2.51892	1.92271	2.25879	6.81727
LOC111556911	0	0	0	0	0	0.642606	0	0	0	0	0	0	0	0	0	0	0	0	0	0	0	0	0	0	0	0.11954	0	0	0	0	0	0	0	0	0	0	0	0	0	0	0	0	0	0
LOC123383296	0	0	0	0	0	0.941914	0	0	0	0	0	0	0.0600947	0.0178165	0	0	0.0442148	0	0.142621	0.0278783	0.0509775	0.277953	0	0	0	0.1335	0	0	0	0.287392	0.871777	1.08952	1.08013	0	0.325884	0	0.0251546	0	1.08407	0.668428	0	0.00932941	0.196065	0.236698
MED4	0.251616	13.2934	9.26457	24.1897	9.39707	9.50532	11.5539	5.36945	3.98006	15.6161	12.6719	14.5867	25.2106	5.8504	2.83549	12.0643	9.89558	4.29218	18.4316	25.2701	31.8065	89.8058	7.1205	1.89248	15.3292	4.79332	3.15812	7.49008	15.4628	13.5007	10.691	15.6153	18.233	10.4746	17.8589	19.0088	11.1941	12.9123	28.2322	20.0225	28.3536	14.578	21.5892	23.6805
NUDT15	0.136115	7.184	20.8197	28.1947	10.9711	11.7453	5.56197	2.32818	6.04536	7.54865	21.2198	42.1956	23.8428	5.33687	2.83919	17.0472	5.86544	29.0495	41.3158	21.3555	7.19502	21.8551	6.68006	3.68928	57.0684	5.0406	3.77852	25.3043	20.6749	14.6194	18.075	8.24998	11.7451	6.05098	29.5461	55.5548	27.3689	39.1302	40.8739	17.8058	28.7498	12.2517	16.2551	18.514
SUCLA2	0.692664	28.57	76.6354	78.4756	24.1523	13.9635	16.0274	25.1351	20.1522	30.3199	211.024	107.344	80.9539	24.2548	5.13396	19.8978	58.0767	97.8577	124.059	64.4283	22.1658	67.5882	43.9447	2.47086	117.072	5.61401	3.62812	18.7315	70.5173	31.5466	46.2248	29.2014	30.1023	41.8916	51.5366	78.2426	11.4216	93.1185	49.3479	41.7708	30.2605	47.7004	20.5382	43.5377
LOC123384078	0.0213313	0	0.65629	0	0	0	0	0	0	0	0	0	0.0250254	0	0	0	0.0207141	0	0.0593922	0.00696569	0.0389194	0	0	0	0	0.0347462	0	0	0	1.06382	0	0	0	0	2.52031	0	0	0	1.67034	1.34078	0	0	0	0.347586
LOC101080856	0.0462007	91.1142	2.46739	12.2313	7.53171	6.04797	19.2999	1.15572	5.05658	170.848	3.80095	4.92896	3.9929	2.49611	1.32521	8.62993	6.47535	0.82498	3.85905	1.63691	7.62477	5.12274	1.51828	0.823199	6.56103	4.78624	4.19391	1.24233	11.3558	2.6929	7.77863	8.88879	14.5699	1.34304	3.50612	10.3725	6.29213	7.54522	8.01764	4.49093	121.635	2.06016	23.0773	3.01129
HTR2A	0.0654788	1.33774	17.9697	0.428707	2.42436	0.223142	1.08937	0.0968632	0.211668	0.674737	0.353441	4.95361	3.39661	25.3574	0.164395	4.33028	2.43033	0.237247	21.5028	2.5535	2.04415	0.120593	0.267948	0.0292945	9.47309	4.39773	3.97163	0.027743	3.16226	1.62834	0.361421	1.43036	1.13442	0.19392	3.86014	8.32116	1.40438	8.23237	0.629206	1.60841	0.761422	1.11607	0.67737	0.960644
LOC123384077	0	0.218855	3.13306	0.0244477	0.25162	0.0247431	0.0430553	0	0.0108327	0.0549684	0.0961968	0.145398	0.381237	0.153979	0.05739	0.799103	0.0411598	0.135848	0.236029	0.130722	20.0191	18.7306	0	0.00649663	0.216913	0.0414253	0.0772621	0.0041017	0.283215	0.933619	0	0.355155	0	0.0222763	3.54409	0	0.208147	0.235151	0.478419	1.1428	0	0.0231594	0.162238	0.293791
ESD	3.38155	208.641	111.826	180.774	112.849	33.9846	119.82	89.1304	79.828	240.759	118.46	117.628	286.207	100.545	98.045	130.557	139.254	60.0561	65.3122	228.677	148.827	244.852	157.45	29.3188	143.275	24.0903	17.3923	43.0471	141.21	166.623	93.572	81.0555	94.3877	123.147	237.652	198.9	72.9958	120.42	178.569	158.978	94.6131	155.414	157.457	178.56
LRCH1	0.0103624	6.34174	9.3834	31.9929	10.2622	8.55721	8.44993	4.535	2.47305	5.65511	9.33438	5.8205	7.63784	4.26957	4.42454	14.1725	8.56677	3.41603	7.30995	9.89977	9.98582	2.94576	14.1368	0.186693	6.04057	5.85243	3.62043	7.01054	12.5655	4.2664	16.4103	13.3537	13.7698	5.35979	6.27913	8.97978	9.45288	5.30724	3.48093	4.45542	17.0811	8.38212	17.8988	4.02882
LOC123384092	0.0154376	5.72316	18.1142	25.5549	8.62856	0.729951	2.3914	3.09821	3.19972	3.44347	27.1413	33.7857	15.8109	8.57444	0.379874	3.29339	2.45962	0.525876	21.0471	9.13672	3.33215	2.95461	4.44813	0.104111	34.7084	5.34101	3.72571	18.9735	40.3269	5.48548	0.71313	1.53232	1.8808	2.03644	4.89196	16.8574	3.75511	25.5222	6.75204	6.19209	6.11496	1.18964	4.92409	7.97951
RUBCNL	0.0712271	1.32907	4.66038	4.33605	1.59149	0.086863	1.04945	0.715904	1.17134	1.54195	1.90141	4.57987	2.52672	1.3578	0.138795	0.764836	0.736225	0.144396	2.94135	2.54513	2.1798	1.59967	1.1197	0.0121061	3.27455	3.15867	2.0182	3.05925	5.56163	2.04485	0.255473	0.202726	0.354249	0.415293	1.60149	1.67201	2.42211	3.33144	2.30091	2.71954	2.43221	1.36425	2.37358	1.93534
LRRC63	0.000421751	0.00522636	0.012731	0.013136	0	0.00295438	0	0	0	0	0	0.00694432	0.0118749	0.00039118	0.000893805	0.00502183	0.0163819	0	0.0223111	0.00798786	0.00447705	0.00170309	0	0	0	0.0280289	0.00369011	0.0106521	0.0628021	8.78454	0	0.00407754	0.0320156	0.000332481	19.8171	0	0.0223679	0.0140388	10.7911	5.27261	0.034564	0.00174111	0.00645719	4.95604
LOC123384100	0.00413364	0.230509	0.39353	0.0715264	0.192535	0.137542	0.152735	0	0	0.337723	0.0750513	0.0340311	0.0703176	0.044091	0.0722724	0.479891	0.355019	0.0227114	0.0460366	0.285264	0.102844	0.00208652	0.00568973	0.0152057	0.0423081	2.01727	1.27489	1.17411	0.0789142	0.664833	0.964804	1.55462	1.64448	0.146641	0.758886	0.271321	1.40064	0	0.0699853	0.38376	4.36161	0.198755	0.363905	0.340801
LCP1	18.0213	17.8099	9.02862	11.1321	48.8423	39.4653	38.3799	0.384384	0.729273	15.1276	13.225	15.5754	39.3719	45.4853	7.73225	175.05	98.6907	1.29214	12.7759	47.3326	24.2492	23.9723	1.29664	10.5232	9.73528	332.811	264.666	1899.29	36.337	26.0898	21.6517	45.3939	73.4679	134.4	10.8439	67.0633	454.589	11.5251	29.9184	19.9059	1369.32	82.6789	42.6082	63.8349
LOC109498029	0	0	0	0	0	0	0	0	0	0	0	0	0	0	18.9091	10.1069	8.4321	0	0	0	0	0	0	0.0730381	0	0.155241	0.0651461	0.0230566	0	0.0866429	0	0	0	0.0156525	0.0180454	0	0	0	0.0840407	0.0791127	0	0.0385732	0	0.357335
CPB2	0	0.090803	0.397005	0.0845279	0	0.0342197	0.320057	0	0.0224724	0	0	0.080434	0.011462	0.0135927	189.233	111.796	85.8035	0.0536794	0.10881	0.0425384	4.53419	19.0063	0	0.763712	0.199994	0.0636569	0.0534267	0.0184361	0.0373034	0.261894	0.380059	0.0377831	0	0.258018	0.54165	0	0.326249	0	0.206767	0.562517	0	1.8672	0	3.92057
ZC3H13	0.0605926	8.23123	10.8169	9.11465	5.33655	2.67651	4.99216	3.60248	1.38132	8.73664	3.05566	7.66916	7.09788	2.88772	0.967929	6.29048	3.07746	1.45652	5.29688	5.93996	5.46912	4.37174	4.93791	0.0670291	7.66224	2.22022	1.29542	3.77754	8.98382	3.64853	5.17234	4.77143	4.98036	3.17742	6.12566	5.88449	2.56223	5.44867	4.91082	4.84258	12.839	2.40837	5.73963	3.98641
LOC123384106	0	0	0.227368	0.0308062	0.0243895	0.0155892	0.0203451	0	0	0	0	0.0732855	0	0.00206412	0	0	0.0134465	0	0	0.00581367	0.516033	2.17728	0	0	0	0.144999	0.0584142	0	0	0.549377	0	0	0	0.00526315	1.27828	0	0	0	0.565172	0.829969	0	0.00108085	0	0.0497934
CBY2	0.000416192	0.0162092	0.14634	0.0272179	0.00977407	0	0.00489196	0.000406786	0.000911714	0	0.0010795	0.0430747	0.0656148	0.00366723	0.00169055	0.00637154	0.00938038	0.00209068	0.0407232	0.00688593	0.0396046	0.050481	0	0.000218711	0.0365122	0.0133261	0.00104042	0.000966595	0.0662875	3.98256	0.00578218	0.00183945	0.00468053	0.00112491	4.45039	0.0428357	0.0443797	0.0524464	6.82798	3.78929	0.129125	0.00171816	0.0254883	3.62505
SIAH3	0	2.66416	1.96111	4.16323	0.120923	0.124134	0.597581	0	0.00205082	2.03967	0	2.65354	2.08602	0.076909	0.00188956	0.0318494	0.0952391	0.0132267	2.06294	0.675473	1.87158	0.292479	0	0.0209088	3.33315	0.0566407	0.0292542	0.0537744	3.42132	1.43485	0.500751	0.325842	0.631707	0.0716943	4.95441	3.96227	0.206224	5.27543	0.387767	2.08886	23.4556	0.215652	1.04429	0.0839179
LOC123384122	0	0	0.800531	0.188005	0.0457984	0	0	0	0.0128161	0	0	0.172019	0.0392208	0	0.0118083	0	0.0144284	0	0.0930815	0.0600428	0.0332705	0.0147656	0	0	0	0.119802	0	0.000303293	0.095734	2.64677	0	0	0	0.0131775	7.5884	0.149614	0.0328343	0.278206	1.63613	2.84075	0.470904	0.0101481	0	0.613859
LOC123383347	0	0	1.54832	0.576903	0.562139	0	0	0	0	0	0.23282	1.16127	1.03291	0.035681	0	0.305373	0.166028	0.0281817	0.428438	0.284741	1.6037	4.43704	0	0	0	0.11697	0	0.0223361	0.930254	1.74266	0	0	0	0.0404357	6.01364	0.994712	0.100754	0.853688	3.12089	3.05795	1.0509	0.0840775	0.196328	1.14766
LOC111559815	0.0035732	0.0885584	1.01223	0.346241	0.234961	0	0.0217776	0	0	0.111213	0	0.235337	0.721023	0.0198851	0.00504838	0.0850928	0.0647697	0.0157058	0.23877	0.174245	0.7681	0.533874	0	0	0	0.130375	0	0	0.218288	25.4469	0.0694996	0	0.0803689	0	46.2315	0.170571	0.168451	0	31.4583	21.5368	1.6106	0.0919779	0.218829	14.9088
LOC111559816	0	0.175756	1.17834	0.0981663	0.190152	0.0993524	0	0	0	0	0.0429183	0.505981	0.610104	0.0131549	0.0267179	0.187455	0.110181	0	0.166908	0.150964	1.15428	1.5058	0	0	0	0.234105	0	0.00548994	0.216611	5.64681	0.0919544	0	0	0.0447238	13.7898	0.141051	0.130011	0.983561	5.36286	5.25466	2.13097	0.0424785	1.6648	4.17372
LOC123384152	0	0.418942	1.08331	0.140397	0.444612	0	0.123628	0	0.0207364	0.105223	0.184144	0.640151	0.868599	0.0313568	0.0191058	0.76484	0.154662	0.0148598	1.2425	0.354742	0.535311	0	0	0	0.553633	0.0881091	0.118319	0.00392583	0.154898	2.22554	0	0.0261483	0	0.0266515	10.1149	0.786746	0.252348	0.18737	2.94777	3.17723	0.831189	0.0697832	3.36443	1.03486
ERICH6B	0	0.0231906	0.335335	0.284961	0.217094	0.0393278	0.0384942	0	0.00573933	0	0.0806971	0.493017	0.302978	0.00824484	0.00991505	0.354634	0.0371528	0.0113103	0.168508	0.0893596	0.299016	0.119967	0	0.00344202	0.239425	0.0353603	0.0245608	0.0211882	0.114325	5.52277	0.0181997	0	0.063138	0.0154906	15.0251	0.407587	0.178285	0.23874	4.43579	5.91419	0	0.0318117	0.114608	3.12221
LOC109498055	0	0.790512	3.72238	1.83971	1.14151	0.372387	0.479512	0.0848655	0.0543445	0.882434	0.498678	8.92808	3.18067	0.0723162	0.0827177	3.05012	0.0332827	0.0979819	1.15133	1.3044	2.63816	0.0564931	0.00243906	0.0260734	2.06756	0.167825	0.124033	0.00823083	0.844907	2.73069	0.179911	0.115126	0	0.139693	9.31503	5.01188	1.04964	2.40833	2.10008	3.95579	0	0.495427	0.434081	1.27446
COG3	0.0123155	17.7745	15.4022	12.2235	18.3291	6.25175	12.595	10.5705	7.98456	15.8819	7.40501	13.3971	36.2306	8.38778	3.92862	14.0532	15.9201	7.5573	8.91991	20.1032	18.0271	8.64576	13.5975	1.81665	10.5714	8.85767	6.99328	10.7046	12.9375	8.81774	11.3502	12.4561	11.9804	11.5204	13.9957	14.2516	7.58315	9.34679	7.9234	11.2722	22.356	12.2259	13.972	9.98433
SLC25A30	0.0309252	21.0056	28.8221	111.835	21.3239	9.4912	21.4141	18.4431	24.8598	20.1328	578.711	34.6785	337.59	48.4441	19.7259	50.0102	150.895	133.427	58.9742	42.01	28.1204	11.0656	90.2632	1.27861	33.736	10.068	5.43979	20.4477	60.8589	24.9143	124.474	15.7916	14.7303	14.9334	23.8296	49.0548	18.6237	23.6549	52.4949	32.4623	23.4699	32.8833	27.0376	37.6495
LOC123384153	0	0.793578	2.99381	2.17681	0.904587	0.0897195	0.654839	0.632874	0.818329	0.664393	12.8544	0.726389	6.84513	2.63196	2.273	1.74533	2.17626	13.1577	0.681513	0.387876	0.594827	0.304572	5.29272	0.00785236	0.524358	1.63191	0.610117	1.27301	1.391	2.995	2.4358	0.407256	0.304081	0.866087	4.23195	0.7133	0.245992	0.805299	0.867384	1.97213	0.874707	0.449261	1.1112	1.29304
LOC109498076	0	0.654083	0.0612805	0.867656	0	0	0	0	0	0.616056	0.0299478	0	2.50789	0.0428369	0.0326259	0.157121	0.0569503	0.0580005	0.293921	0.0430899	12.051	10.0344	0.0181631	0	0	0.154758	0	0	0.100766	0.526466	0.128329	0	0	0.0104026	0.239857	0	0.10368	0	5.38979	0.478457	0	0.00640886	0.505077	0.314503
TPT1	4275.05	3145.85	578.915	938.652	2812.9	3233.72	3865.8	2387.12	1805.31	2821	3920.8	933.423	9574.13	3695.22	1875.9	3541.99	5072.17	7411.57	988.127	2838.71	3545.81	847.892	3003.77	1696.72	869.422	2100.85	1544.17	2660.24	1717.78	651.792	4224.3	3416.48	3705.35	3790.37	678.251	932.847	3435.17	677.49	1220.09	1136.74	4043.16	4476.89	4995.04	1940.95
LOC111557013	0	4.77449	10.48	4.19057	21.9169	1.41373	15.3193	10.5442	4.27633	8.56555	11.992	0.302091	68.9638	11.1632	26.414	31.4581	18.9405	24.1929	2.04332	28.2943	116.028	1.14836	7.52559	0.371195	0.751131	26.3945	18.1395	12.7831	5.88433	8.69238	23.9092	12.2038	13.8242	18.5133	105.784	8.53922	10.235	2.44286	1.24251	14.1674	68.7897	29.3075	39.8878	4.53344
LOC111557014	0.498381	7.49938	16.3667	7.88456	3.90141	0.748109	5.42409	4.99295	2.07434	11.0798	9.37189	11.1368	9.35503	1.88204	10.3106	9.74915	3.59513	22.5319	3.96465	10.7257	3.54275	0.610946	3.91997	0.261902	2.91484	6.21609	7.47528	3.38975	6.5242	4.97098	6.57782	3.30405	3.20276	3.47989	38.8246	12.7451	3.91585	3.55491	1.80813	4.63114	2.91743	3.71726	5.4503	2.21637
LOC109498077	0	0.888223	0.665734	0.786924	0.270875	0.0173137	0.497105	0.0507308	0.0682207	1.53855	0.291689	0.32557	0.371155	0.245293	0.0279361	1.44206	0.977107	0.0869106	1.48643	0.428301	1.48896	0.334354	0.210927	0	0.70832	0.128831	0.129752	0.0502273	0.264236	0.332809	0	0.1147	0.111184	0.113011	3.70195	0.235972	0.116519	0.987271	0.0836923	0.287564	0.202557	0.177662	0.946037	0.120221
LOC111559737	0	0.978997	0.314473	2.06571	0.302349	0.0439216	0.35921	0.145853	0.0307667	0.702538	0.705806	1.23886	2.02432	0.305896	0.0248039	0.343424	0.616976	0.0992138	0.363113	0.220579	1.44931	0.549424	0.0586862	0.00922577	0.102678	0.0261455	0	0.00436857	0.191518	0.218885	0.0487813	0.0193981	0	0.0869942	0.674702	0	0.0985287	0.751353	0.0849244	0.18787	0.0513848	0.267979	0.595178	0.0878334
GTF2F2	0.541991	60.2321	20.0877	47.541	27.5673	25.4815	44.2131	38.8291	15.109	56.3384	20.6588	29.5755	55.3681	59.1902	11.2924	33.2605	34.3525	25.0217	25.9634	50.155	48.577	110.358	54.5505	4.18556	27.1676	11.1962	8.26836	73.8523	42.184	27.0038	31.8452	44.0163	40.1663	33.883	48.9432	28.236	26.4519	17.3473	50.749	40.9567	65.4882	38.9629	31.7031	30.3848
KCTD4	0	1.15541	5.46977	35.987	3.14064	7.64552	0.651826	0.0281433	0.0336408	1.38697	0.199159	31.4717	0.463276	0.178046	0.233435	0.310201	1.58001	0.388728	5.63484	1.76948	0.0618598	0.0249159	0.0150985	0.00567428	22.9031	0.335909	0.0239937	0.0278639	0.523524	0.929979	6.92064	26.5552	35.9749	0.194566	2.31289	6.52898	0.12928	32.5879	0.104465	0.362763	0.786591	0.20178	0.398864	0.0693612
GPALPP1	0.000798564	3.13203	4.42056	4.87152	1.63878	0.836297	1.33828	1.83133	0.911056	2.85052	0.942429	4.8568	3.83502	1.25024	0.508064	1.41083	1.09563	0.757729	5.26616	3.15391	1.2305	1.09191	2.15233	0.0453483	5.50271	0.859155	0.544988	1.23525	3.49191	2.42935	1.67894	1.47772	1.5458	0.930097	3.17418	3.23905	0.772147	4.19161	4.32225	2.15416	2.88981	1.06529	1.75754	1.39872
NUFIP1	0.102097	43.8601	21.4812	24.2815	14.4839	12.2179	31.4152	24.7299	13.3597	35.9258	13.2849	29.9326	38.2492	38.9519	3.84862	16.8845	20.5422	10.1844	24.7944	25.8172	37.3649	73.906	39.4191	1.29363	36.1097	7.48371	5.06203	35.7917	26.3997	39.1709	22.8645	19.6321	23.0596	11.4917	74.0681	20.375	14.1053	32.8051	63.9214	42.632	40.5579	20.5344	22.8828	32.8562
LOC101085341	0.00273634	0.455492	0.568995	0.29681	0.69377	0.543574	0.566278	0.160669	0.338183	0.635572	0.148303	0.10087	0.552636	0.185614	0.184646	0.486296	0.30846	0.489175	0.363879	0.427959	0.479606	0.199967	0.0112431	0.0600939	0.209005	0.255456	0.28587	0.0853667	0.280686	2.38304	0.635493	0.916062	0.390405	0.148103	6.42889	0.292439	0.673875	0.20392	1.33107	1.84861	0.836764	0.0565316	0.468969	1.14027
TRNAE-UUC_1	0	1.64202	0	0	0.726096	0	0	0	0.203188	0	0	0	0.310906	0.430154	0.140408	0	0.0857813	0.728027	0	0.346156	0.791214	2.80915	0	0	0	0.172669	0	0.0384677	0	5.78221	0	0	0	0	7.22569	0	0	0	0	1.74229	0	0	0	0.515614
LOC123384179	0	0	0.077087	0	0.272878	0	0	0	0	0	0.0188363	0	0	0.0158772	0.0278495	0	0.0559687	0.273604	0	0	0.00550649	0.00418938	0	0	0	0.0811148	0.0726176	0.00120473	0	2.30239	0.080715	0	0	0.0130858	4.20907	0	0.293452	0.138135	2.05509	1.9197	0	0.00201549	0	0.440033
LOC123385750	0	0	0.341105	0	0.313047	0	0.0248701	0	0	0	0	0	0	0.0113544	0.05477	0	0.0387447	0.295944	0	0.00355335	0.0379025	0	0	0	0	0.0531745	0	0	0	5.7083	0	0.0631227	0	0.0836387	8.90077	0	1.98783	0	14.6465	7.29192	0	0.00792747	0	6.49301
TSC22D1	0.0552488	34.4549	31.074	44.3422	22.2506	5.5527	23.7276	5.762	4.97935	24.9548	17.631	44.6677	73.6116	10.7857	1.83592	21.1037	26.9703	9.07382	40.2163	52.559	43.4432	53.9102	20.2494	0.83497	46.2038	1.8878	1.42667	1.74522	28.5223	19.2714	9.98524	4.9643	5.36655	17.8051	30.6978	38.1777	5.30905	48.7006	16.6406	18.3573	15.1963	18.8003	67.9475	24.7894
LOC109498118	0	0.0724421	0.733	2.68058	0.224236	0.0819008	0.115794	0	0	0.523101	0.00663367	1.97322	0	0.0542211	1.16611	0.348036	0.539287	0.0128475	3.74358	0.131399	0.054299	0.0324587	0	0	2.22877	0.167591	0.0255741	0.0016971	0.100442	0.648677	0.0568517	0.0226073	0.0657429	0.101387	1.46108	0.444751	0.0344488	2.18915	0.507244	0.443143	0	0.0227137	0.548203	0.218947
LOC123384182	0	0.298131	0.955882	3.22395	0.0878883	0.514949	0.171066	0	0	0.166399	0.0182003	0.726238	0.150531	0.440088	0.779424	0.604757	0.623279	0.00587481	1.25782	0.196695	0.0390175	0.164953	0	0.0442496	0.957592	0.104501	0.0467772	0.00310415	0.484806	0.159975	0.0519932	0.0413507	0.0601247	0.147513	0.662472	5.84594	0	1.46818	0.24892	0.374385	0.0547683	0.14476	5.24888	0.130023
SERP2	0.0143446	6.21346	15.3278	13.9111	2.4939	0.671416	4.54814	0.910049	0.757873	6.33167	0.319635	13.7312	7.01911	0.559102	0.921212	3.29958	1.97321	0.101741	14.7049	10.7163	5.59603	1.46985	2.10728	0.0359775	15.9297	0.0696719	0.0285244	0.23169	5.34751	22.0776	0.513623	0.358059	0.381302	1.12261	17.9769	15.6794	0.543044	21.7473	46.1992	28.775	0.494281	0.91171	7.69673	22.1656
SMIM2	0	0	0	0	0.430279	0	0.0299106	0	0.120408	0	3.20775	0.161613	0	0	0.0138675	0	0.0677778	0	0	0.119659	0.130241	0	0.108081	0	0	0.102323	0	0.0227957	0	0.685299	0	0	0	0.123803	4.42462	0	0	0	0.498538	1.00118	0	0	0	0.0763873
LOC109498125	0.00537641	0.166562	0.205986	0.0883792	0.25042	0.0470774	0.0593914	0.0229902	0.0412216	0.0836684	12.1897	0.0221312	0.148226	0.0374002	0.125335	0.384104	0.0903496	0.169853	0.0898162	0.148353	0.271095	0.166052	0.160957	0.00494432	0.192598	0.113848	0.0058801	0.0187298	0.0872437	1.91377	0.209145	0.0519797	0.0302317	0.0550992	5.73819	0.192487	0	0.0111853	2.40082	2.24451	0	0.055162	0.0411575	1.44224
LOC102900805	0	0.0327931	0.0860259	0.032969	0.916462	0.0148299	0.0419339	0	0	0.0494185	4.4107	0.0610015	0.014902	0.0269992	0.0119642	0.0315097	0.0689829	0.00697898	0.0353664	0.074201	0.0456486	0.0646509	0.0670218	0.00097345	0.021668	0.0524158	0	0.00829704	0	4.15719	0.0720596	0.0409355	0.0476168	0.0200272	5.83379	0.0884272	0.0395055	0.105705	9.08618	4.19951	0.0216873	0.00899679	0.0648255	8.42174
LACC1	0.0121393	2.22049	2.01602	1.97678	3.20019	2.6828	1.56254	0.969798	0.564916	1.78441	1.51228	2.36922	4.27464	1.02601	1.65577	4.62776	3.26677	0.278822	1.89569	4.21167	2.10944	0.818156	1.67926	0.130324	2.38499	1.44742	0.984776	1.11294	1.94719	2.00046	5.08733	6.69333	6.71542	3.61594	3.84422	2.84861	2.01258	1.70966	1.64254	1.64391	3.29547	3.72248	3.76968	2.46108
CCDC122	0.00254457	0.359338	0.953039	0.28571	0.651395	0.254746	0.184408	0.162125	0.104461	0.320091	0.391736	0.342756	0.397533	0.17923	0.132167	0.549159	0.481383	0.0782681	0.74527	0.456453	0.335484	0.233121	0.0846428	0.0195006	0.355932	0.294878	0.199445	0.125048	0.206455	2.11422	0.479459	0.649815	0.874589	0.506841	2.77393	0.599547	0.414281	0.224105	1.95291	1.65807	1.03616	0.235377	1.14278	1.81948
ENOX1	0	1.1037	3.65274	2.08306	0.32537	0.0779198	0.709091	0.542375	0.280838	0.952072	0.784369	2.27521	2.16037	0.803681	0.196667	0.355369	0.381925	0.412657	1.62704	0.728101	1.17497	0.344119	1.55189	0.0646905	1.42231	0.836115	0.394437	0.403562	0.709442	1.42513	1.09243	0.14238	0.155047	0.167104	2.70679	1.09096	0.11171	1.64272	0.923067	1.42414	0.0160493	0.286652	0.636841	0.853792
LOC109498151	0	0.245842	3.2461	0.260892	0.184808	0.0138971	0.160963	0	0.0121685	1.29668	0.118324	0.146994	0.0186195	0.0213908	0.12454	0.231024	0.0419456	0.154409	0.157092	0.0345508	0.148733	0.00433603	0.00273069	0	0.101525	0.496486	0.173579	0.032909	0.106046	1.35654	0.540215	0.0383606	0.0359203	0.00625581	2.23938	0.142054	0.0409174	0.264148	2.19399	1.36922	0.111777	0.00842123	0.265772	0.929611
LOC123384250	0	1.43478	5.80707	1.2822	0	0	0.49396	0.118823	0.0177543	5.49554	23.7019	1.81108	6.23473	0.069803	0.220836	0.620382	0.219867	1.94659	0.386842	0.27222	0.514673	0.0993529	0.0318735	0.0212954	0.474015	0.875081	0.30391	0.0504188	0.48628	1.27032	2.30829	0.223879	0.390628	0.018255	0.715554	0	0	0	0.14702	0.396745	0	0.0281165	0.177267	0.157688
LOC123384248	0	0.234219	0.911351	0.180899	0.0987158	0.0144813	0.216665	0.0944605	0.0172086	0.248177	0.187669	0.284464	0.0505842	0.297953	0.042142	0.0703289	0.269253	0.116178	0.0772925	0.110067	0.296843	0.953821	0.693688	0	0.205541	0.0631134	0.0077518	0.00745896	0.109376	0.496707	0.28577	0.0696674	0.0680853	0.0118735	1.27761	0.144501	0.029005	0.127796	0.181251	0.481981	0.0181521	0.180977	0.142428	0.0973929
LOC123384253	0	0.204779	0.575566	0.457505	0.120737	0.0771721	0.193037	0	0.101359	0	0	0.362789	0.697924	0.132835	0.0428034	0.131176	1.11971	0.0484231	0.122693	2.65013	0.478748	0.0760167	0.0606554	0.0101313	0	0.200982	0.240976	0.103943	1.09365	1.18124	0	0.170417	0.123894	0.0434241	3.3642	0	0.0973795	0	0.746079	1.97838	0.33857	0.0695576	1.09635	0.428686
DNAJC15	0.0868629	252.238	104.596	233.671	104.24	99.131	155.413	109.995	100.009	293.56	186.755	310.004	264.241	142.247	21.6863	91.4479	54.3492	37.5596	213.553	109.252	166.498	274.443	150.15	32.1392	265.381	19.0916	11.4634	82.2308	266.43	216.165	104.186	72.8386	84.1733	46.4159	422.2	284.986	98.9474	256.853	704.318	294.055	217.566	82.1709	215.223	344.512
EPSTI1	0.13621	0.799541	1.93097	2.52065	2.96986	1.41617	1.69528	0.147145	0.0681569	0.669385	5.42121	10.3993	6.7149	5.12727	10.8185	16.0309	2.21747	0.987859	1.27746	3.75216	9.4294	8.22807	1.55712	0.319092	7.10267	41.3453	34.2916	12.8223	5.7673	14.3296	3.22799	2.87221	4.54711	86.0653	18.7959	3.49063	56.412	6.28797	39.2649	22.0281	71.9712	12.9607	35.0023	19.7059
LOC109498166	0	0	0.647083	0.069382	0.0952124	0	0.012219	0	0	0	0.254804	0.154051	0.172484	0.0440088	0.655382	0.278507	0.0360527	0.30549	0.0893129	0.0791435	1.75091	0.471719	0	0	0.218878	3.89878	3.0873	0.0748875	0.147993	1.18648	0.0909882	0.0413507	0.0150312	0.42726	3.14861	0.00797536	0.702296	0.389291	0.285692	1.3668	0.876292	0.167155	0.542282	0.202836
FAM216B	0	0.146609	0.802163	0.212905	0.077796	0.0994509	0.0432635	0.00809446	0.00725672	1.25198	0.0214805	14.649	12.0754	0.00438932	0.138737	0.450789	13.1766	0.0728027	0.0527046	0.370881	0.059655	0.316508	0	0.00435204	0.339052	0.329922	0.248434	0.00961693	0.117448	0.654924	0	0	0.0266102	0.0522295	1.19568	0.254143	0.104577	0.393815	0.245374	0.531739	1.89069	0.0212603	1.68457	0.911533
LOC109498172	0	0	0.302933	0.0405665	0.00951607	0	0.00264602	0	0	0.0067563	0.0571483	0.100079	0.163496	0.00362411	0.0324328	0.0361862	0.0175193	0.037927	0.0193406	0.0430037	0.426157	0.00460203	0	0.000798517	0.0355484	0.0840127	0.0265901	0.00478943	0.0472429	0.283636	0.0126665	0.0167896	0.00976496	0.0417551	0.518474	0.0479259	0.217463	0	0.191112	0.428573	0.369143	0.0247231	0.37888	0.0834134
TNFSF11	0	0.149716	0.720039	0.613225	0.353087	0.112843	0.392714	0	0.0123508	0.125344	0.146238	1.65774	1.87567	0.067235	0.0433848	0.191809	0.411055	0.103995	0.897025	0.67507	1.1262	0.079279	0.34368	0	0.577061	1.05482	0.757573	0.438425	0.246023	0.793324	0.274155	0.218038	0.407612	0.860364	1.6617	0.636807	3.54394	1.47459	0.954566	1.30055	9.07618	4.7358	0.832385	1.11067
AKAP11	0.00103783	5.60689	26.7774	23.1304	3.1234	0.965619	2.09079	2.58324	1.09366	6.56765	2.67657	22.1701	4.24999	0.984504	0.586324	2.59377	3.05246	0.594166	27.4626	6.14656	2.00062	0.16584	2.14227	0.129666	26.4795	0.612978	0.331763	1.16129	9.62955	8.41392	3.61728	1.81069	1.86411	1.2327	15.9658	16.3215	1.47872	25.2768	7.35694	4.87598	5.81102	1.51864	3.0355	4.06822
LOC111559850	0	0.285694	0.420185	0.507724	0.0689089	0.205544	0.086223	0.0716978	0	0.554478	0.713498	0.741956	0.0983535	0.130245	0.0259101	0.349381	0.312974	0.0368492	0.256761	1.09596	0.419941	0.368159	0.0692367	0.0501134	0.600641	0.245803	0	0.0267719	2.0246	1.66716	0.366888	0.194526	0.0942816	0.0693945	3.03251	1.68833	0.271716	0.313944	0.869374	1.23845	1.76059	0.0893231	1.1552	0.654486
DGKH	0.0231878	1.01693	4.37641	3.26741	0.838255	0.195308	0.42064	0.807297	0.81189	1.28992	1.20943	1.66147	0.528585	0.296766	0.0811551	2.77855	0.393942	0.315871	1.32188	0.998539	0.470959	0.0329084	1.24884	0.00568361	2.55806	1.46972	1.00648	0.00679907	0.93715	1.79161	1.06696	0.780458	0.70288	0.215437	3.84112	0.674897	1.47778	1.49536	3.39701	1.58406	0.18113	0.593842	0.947298	0.897005
VWA8	0.0570365	7.81378	18.2665	13.3835	6.58067	5.08934	4.20202	10.7395	5.80501	9.64128	24.4965	10.813	8.82895	6.22275	9.26138	7.43306	7.11065	14.1736	7.95339	8.64402	5.59846	0.743182	13.5342	0.270583	11.2004	2.13491	1.28374	1.51091	12.8997	13.3563	9.16477	8.47309	9.27208	4.74275	19.481	11.3579	1.90384	9.09023	8.71473	9.34128	1.62393	6.09806	6.51627	7.61974
LOC123384296	0	0.773277	3.46139	0.143968	1.1398	0.0242845	0.16903	0.0711559	0.0318958	0.863195	0.944141	0.228325	0.0325367	0.022508	0.991836	0.866851	0.0927635	1.69901	0.231655	0.0664136	0.0782014	0.146991	0	0	0.212893	0.0993852	0	0.0100642	0.661824	1.83263	0.944002	0.536267	0.623793	0.0546588	3.27677	0.248233	0.0408579	1.15397	1.28393	1.01941	0.28411	0.0218884	1.06154	0.856609
LOC109498198	0.0191575	0.237401	0.911916	0.0331492	0.629866	0	0.0583797	0	0	0.223599	0.347828	0	0.112376	0.0177688	0.0541332	0.285138	0.124021	0.0210514	0	0.0708994	0.0571962	0	0	0	0	0.88623	0.125714	0.0333696	0.329158	0.262737	0.0465773	0	0	0.521036	0.992445	0.228627	4.49688	0.637695	0	0.198465	9.02764	0.281459	0.293309	0.05591
LOC123384297	0.0108661	0.336633	2.80065	0.188022	0.476345	0.0761173	0.264903	0.0929295	0.0666494	0.930049	0.147966	0.178915	0.101983	0.0403138	0.0498944	0	0.0679998	0.0358209	0	0.0946212	0.360462	0	0.104696	0	0.444861	0.0991177	0.0950728	0.00315453	0.580837	1.59862	0	0	0.122201	0.119926	2.2714	0.648384	0.298818	0	0.367941	0.688402	1.00183	0.0501358	0.582276	0.803372
RGCC	5.56131	167.829	83.0458	509.151	70.034	52.9936	64.4401	12.6075	30.3632	139.402	147.631	143.204	133.289	16.5115	22.8992	284.618	89.6815	29.15	295.861	139.21	26.8557	3.93576	4.15996	5.22763	159.707	52.6424	39.789	179.336	218.995	64.8015	293.779	50.8179	55.8837	31.5555	35.0278	205.326	48.0693	153.267	48.2012	28.0252	1038.48	85.0637	111.328	20.6174
NAA16	0.00531094	4.89281	3.23792	3.22561	6.30523	0.658324	3.00232	0.683719	0.561167	6.44215	1.55563	2.04817	4.93372	0.769028	0.615056	4.0408	1.80465	1.01956	2.0189	6.19377	4.31096	0.635681	0.81212	0.100964	1.85241	1.7106	0.906489	0.632914	5.50166	2.12511	3.33503	4.02783	4.529	1.2703	3.79722	1.49936	2.03363	1.5296	1.80872	2.43031	9.87218	3.3415	5.74589	1.59776
MTRF1	0.0156703	2.48629	3.89466	6.00407	2.19273	0.741935	1.52298	1.13388	0.998932	3.52079	3.48276	4.51533	3.11216	1.69287	1.11707	2.25405	2.1326	1.24811	3.947	5.51137	3.17005	2.37013	1.83494	0.242156	4.64836	1.69086	1.12991	0.932026	4.69892	3.5614	2.6506	2.49655	2.68436	1.80449	6.14542	2.6816	1.96559	2.72685	5.52945	3.31045	4.64103	2.34233	3.11681	2.58554
KBTBD7	0.289903	16.3528	17.8386	26.0866	10.6456	3.46815	10.9024	6.0212	7.43457	12.4213	4.4048	19.9459	26.6068	5.00761	1.69986	11.2691	6.69887	2.52368	10.4617	19.8637	9.53765	31.1732	11.5941	0.446649	16.7241	3.49195	2.69297	8.1974	28.5456	19.3362	6.32063	6.19531	5.66313	5.35325	32.8578	11.6148	5.28222	15.8222	15.9279	16.4073	9.68083	7.89296	6.384	12.1599
LOC123384315	0	0.69367	2.55436	1.54976	1.49368	0.0681949	0.867743	0	0.0597124	1.28775	0.26513	1.2022	0.845158	0.124155	0.0395435	0.579586	0.226883	0.342321	1.95158	1.25676	1.21104	1.51596	0.0468996	0.0268583	1.19568	0.393263	0.170355	0.0635895	0.799159	6.88201	0.473377	0.0752963	0	0.207212	13.2009	1.39416	0.248594	1.13419	4.14117	5.98133	0	0.386126	0.149049	1.37795
LOC101090830	0.0144497	15.3042	45.5766	40.5097	9.26906	2.07503	10.4318	7.61238	7.91995	13.2813	2.49645	29.1602	26.2535	9.62956	1.9688	7.46823	9.44017	1.52629	27.227	21.1952	11.784	3.76722	10.9739	0.431875	33.6829	2.66791	1.65146	7.48774	23.3029	17.5461	5.26531	4.5892	4.11335	5.82126	36.645	28.0114	5.61814	36.4799	13.6542	16.0484	7.32727	9.24901	4.79796	12.0775
LOC123384317	0.0129362	1.44275	2.26785	1.05205	1.94938	0.0906183	0.571607	0.0221267	0	2.1138	0.792694	0.639	0.273176	0.229471	0.335837	2.92661	0.516433	1.30068	0.180089	1.66577	3.62188	3.04123	0.0712238	0	0.993021	0.30343	0.0565925	0.137075	1.16072	4.83051	0.943545	1.32573	1.49118	0.418119	10.4403	0.771907	0.431976	0.645909	2.12174	4.26655	4.5057	0.254456	4.80292	0.795969
WBP4	0.844232	11.6981	8.15276	8.53869	10.5229	2.85813	7.87842	9.65265	6.09617	11.0073	8.00757	7.90762	15.2884	8.20305	2.81618	10.0687	5.68184	5.13746	5.40611	14.9412	10.9517	12.4692	15.3632	0.801061	7.54923	4.21579	1.97156	9.1967	15.6783	9.81543	10.1641	9.24375	9.74577	8.22672	17.1816	10.1819	4.94926	5.4738	14.6138	13.0967	15.6335	7.66052	10.4289	9.85201
ELF1	0.225876	5.29342	2.01044	1.87429	7.32143	7.18209	5.21822	6.00061	3.6076	4.42951	3.93195	2.8954	6.09008	5.21062	1.34013	9.10028	5.63031	1.34022	2.02599	6.44863	4.77927	3.116	6.14691	0.247858	1.74533	12.1689	8.37738	8.04716	4.15851	4.20489	11.0734	12.8862	13.4684	8.30463	5.63118	5.25277	7.65137	1.4102	3.60797	3.13858	73.2209	7.45317	9.07914	3.23845
TRNAE-UUC_2	0	0	1.23072	0	0	0	0	0.226645	0	0	0.601453	0	0	0.0614505	0.912652	0	0.200156	1.01924	0	0.0576926	0.263738	0	0	0	0	1.72669	3.47808	0.25004	0	1.98247	0	0.512433	0	0	2.89028	0	0	0	0	1.02954	0	0.1448	1.52154	0.193355
LOC109498230	0.0412015	1.51753	1.1693	0.958495	5.0548	3.39126	2.85639	2.72691	1.95681	1.08645	1.40781	2.05405	4.45235	3.7509	0.507329	4.61972	3.82015	0.729425	1.63152	4.24207	3.32659	2.07567	3.11757	0.159981	1.15968	5.99984	5.07693	4.98748	1.74793	3.51023	4.06811	5.0722	4.98107	3.7912	5.36726	1.38633	5.01551	1.16194	2.29617	2.33983	22.2528	7.12383	6.18547	2.81794
SUGT1	6.33417	76.2073	87.2317	50.0108	46.0169	12.8539	59.0218	89.7346	79.9168	99.2338	55.3386	58.6525	92.0079	76.23	19.1866	48.0521	53.2006	60.7345	32.7994	95.259	132.668	170.86	87.8696	8.53349	52.8671	33.0078	19.94	66.0466	64.6008	90.0458	48.8042	45.7591	50.5619	53.1081	175.672	51.0054	48.1908	43.7993	181.869	118.319	113.99	66.5022	60.4368	117.389
CNMD	0	35.2729	4.04311	1.46461	187.767	7.46237	18.7151	0.198551	0.185419	15.5808	0.834258	1.49323	66.0039	0.143556	0.445889	38.399	0.242145	1.09486	2.59908	10.7801	2.13558	0.941166	0.406107	0.00444801	1.46037	0.255262	0.126957	0.115491	35.0695	1.68246	4.89193	3.79707	3.39963	0.661547	3.89034	5.29598	0.916819	0.623874	1.20786	1.98789	0.148645	1.43354	1.9809	2.32203
PCDH8	0	3.68068	12.1131	6.29559	0.182722	0.0302794	1.42167	0.00422483	0	2.39281	0	44.3633	11.2426	0.0761748	0.000872438	0.00735267	1.54493	0.0122139	22.65	0.927026	2.64619	8.59017	0.021249	0	11.37	0.0321869	0	0.0150584	16.7469	0.477333	0.0420371	0	0	0.195937	1.45917	5.1438	0.203776	15.894	0.721379	0.729272	0.101213	0.00374887	0	0.228572
LOC109498231	0.00105349	0.150132	0.670262	0.415624	1.30466	0.00368988	0.135638	0	0	0.188538	0.0191275	1.19472	0.272524	0.0136798	0	0.012544	0.0618353	0.14702	0.689304	0.0362363	0.119346	0.274791	0.000725038	0	0.350434	0.137281	0.0184351	0	0.452519	1.18476	0.0102454	0	0	0.00726691	3.36454	0.125725	0.0124162	0.311225	1.12369	1.26181	0.0215844	0.00140707	0.4113	0.26518
OLFM4	0.0113875	1.49581	0.438933	1.10344	1.51009	0	0.716591	0	0	0.38987	0.248105	1.65	1.17564	0.201735	0.0144799	0.298302	77.4143	0.315334	0.228282	0.729828	1.4249	2.70329	0.00626971	0.00837785	0.233103	0.0920024	0.0199269	0	1.67829	0.573587	0.310085	0.0176153	0.0512258	1566.37	0.819682	0.190259	0.250525	0	0.694073	0.805828	0.606609	0.04867	0.66252	0.666889
LOC123384323	0	0.560184	0.264915	0.0744959	0.44824	0	0.291912	0	0.0132036	0.133998	0.0390836	0.389883	0.0808132	0.0479181	0.0131842	0	0.00743232	0.463625	0.0479479	0.0974735	1.4746	2.31005	0.0118519	0	0	0.106594	0.0376687	0	0.361638	0.11809	0.0628037	0.0665978	0	1.90741	0.328678	0	0.0930242	0	0.0728909	0.262459	0	0.00731842	0.230703	0.142399
LOC102901843	0	0.151192	0.0607915	0.0387044	0.0640707	0	0.112314	0	0	0.039556	0.00461497	0.0251112	0.0632183	0.0179175	0.00125692	0.0181593	0.00680144	0.0994341	0.00566167	0.0885356	0.520927	0.245185	0.0041984	0	0	0.0384221	0.00667187	0.000295164	0.112578	0.0836638	0.0568547	0.0117958	0	0.248871	0.0942532	0.0546015	0.0169757	0.0253828	0.0268966	0.0785917	0.0312465	0.00351835	0.132315	0.0521741
LOC102901884	0	0.489426	1.67872	0.467959	0.366818	0.00937848	0.334549	0	0	0.218767	0.0364619	3.85775	0.914133	0.0701602	0.00472887	11.8963	0.175656	0.105925	2.85537	0.182453	0.893239	0.638961	0.0165853	0	1.37029	0.0662957	0.005857	0.00187728	0.98658	0.193629	0.0325505	0.0103551	0.0451694	0.160775	0.637597	0.782902	0.0473369	1.5375	0.257839	0.445607	0.0548605	0.0131673	0.0922406	0.196444
LOC123383730	0	0.166047	0.819325	0.185486	0.220276	0	0.013611	0	0	0.0695082	0	0	0.04192	0.0165709	0.012621	0.558421	0.0327704	0.117793	0	0.0213917	0.127424	0	0	0	0.0914298	0.128047	0	0	0.068215	0.233887	0	0	0	0.0211265	0.617026	0	0	0.37169	0.113431	0.718985	0	0.00216929	0	0.108627
LOC123384324	0	0.116364	0.784945	0	0	0	0.200307	0	0	0	0	0	0.0440655	0.0435476	0.20232	0.559049	0.0202633	0	0	0.0367961	0.703993	3.47668	0	0	0	0.122364	0.0821594	0	0.286825	1.38149	0	0	0	0.0222078	2.6627	0	0.0368901	0	0.715421	1.73232	0	0.00456063	0.575071	0.826708
LOC123384325	0	0	0.161112	0	0	0	0.0352401	0	0	0	0	0	0	0	0.0653536	0.137696	0	0	0	0	4.01265	17.4853	0	0	0	0.0904159	0.101181	0	0	0.14418	0	0	0	0	0.588566	0	0	0	0.195789	0.20274	0	0	0	0.0618737
LOC102901923	0	0.157006	1.29446	0.526161	0.27771	0	0.135134	0	0.0194283	0.0985854	0	0	0.0594562	0.123391	0.0179006	1.50862	0.0218725	0.0139224	0	0.0551643	0.109278	0	0	0	0	0	0	0	0.0967511	23.379	0	0	0	0.449465	25.978	0.302407	0.248873	0.632614	30.4068	20.8192	0	0.0399979	0	19.1414
LOC123384328	0	0.118641	0.258432	0.00828314	0	0	0.0510566	0	0	0.0372478	0	0.0394098	0.0112319	0.0177599	0.00169081	0.0427492	0.0113629	0	0.0533129	0.0135475	12.5991	10.9265	0	0	0	0.0499034	0.0104709	0	0	0.0895246	0.0465539	0	0	0.0867958	0.426363	0	0	0	0.0911776	0.146867	0	0.00639358	0.0732906	0.118749
LOC111556986	0	0	0	0	0	0	0	0	0	0	0	0	0	0	0	0	0	0	0	0	0	0	0	0	0	0	0	0	0	0	0	0	0	0	3.66843	0	0	0	0	0.475171	0	0	0	0
LOC123384333	0	0	0.0264955	0	0.0125054	0	0	0	0	0	0	0.0187881	0.00535468	0	0	0	0.00196986	0.00125387	0	0	0.0158981	0	0	0	0	0.0832679	0.0499186	0	0.0087135	0.672917	0	0	0	0	2.54909	0	0	0	0.224583	0.4542	0	0	0	0.14264
LOC123384334	0	0	0.025546	0	0	0	0.00788851	0	0	0	0	0	0.0121477	0.00180075	0.000914338	0	0	0	0	0	0.0901668	0.266558	0	0	0	0.0421659	0.0113246	0	0.00988381	1.29583	0	0	0	0.00204071	4.79713	0	0	0	0.906681	1.10054	0	0	0	0.161798
LOC109492563	0	0	0.00906747	0.00103955	0.000329207	0	0.00263173	0	0.000322435	0	0.000681737	0	0	0.00323887	0.000488061	0	0.000129642	0.000330083	0	0.000588543	0.142164	0.194459	0	0.000552491	0	0.00900302	0.00262823	0	0.0111825	0.40092	0	0	0	0.00112482	1.49608	0	0.00118009	0	0.335342	0.412776	0	0.000145892	0	0.17767
LOC109498248	0	0	0.0453024	0	0	0	0.0594542	0	0	0	0	0	0	0	0	0	0	0.0107194	0	0	0	0	0	0	0	0.152542	0	0	0.633186	46.4118	0	0	0	0	75.7856	0	0.383234	0	129.568	42.1065	0	0	0	43.9379
LOC123384341	0	0.0273417	0.133204	0	0	0	0.058832	0	0	0	0	0.0181646	0	0.0219994	0.00389662	0	0	0	0	0	0.0834398	0.0712776	0	0	0	0.112131	0	0.00128107	0.0716068	5.5366	0	0	0	0.00782718	16.7321	0	0.00866797	0	3.95971	3.73836	0	0	0	1.69566
LOC123384343	0	0.0506319	0.028462	0	0.0745562	0	0.0186765	0	0	0.0953766	0	0	0	0.0056845	0	0	0	0	0	0.00177896	0.00542159	0	0	0	0	0.0798642	0	0	0.166456	1.12581	0	0	0	0	3.03758	0.0487607	0.00802576	0	0.907936	0.940981	0.181237	0	0.0625559	0.222586
LOC109498249	0	0	0.0193419	0.019218	0	0.0826635	0.221052	0.0118731	0.00425773	0.021605	0	0.0228591	0.00325746	0.376644	0.0161821	0.0991841	0.00479337	0	0.108232	0.0160183	0.198034	0.181499	0	0.00255346	0	0.066937	0.0303674	0	0.116617	1.06451	0.0945101	0.102009	0.163936	0.0021889	3.70327	0.0248522	0	0	0.879967	0.852984	0	0.230096	0	0.440283
LOC111556964	0	0	0	0	0	0	0	0	0	0	0	0	0	0.0413499	0	0	0	0	0	0	0	0	0	0	0	0.116189	0	0	0	2.22333	0	0	0	0	13.614	0	0	0	1.50959	0.639482	0	0.0649571	0	0.173478
LOC111556987	0	0	0	0	0	0	0.282263	0	0	0	0	0	0	0.429557	0	0	0	0	0	0	0.0614535	0	0	0	0	0	0	0	0	4.61935	0	0	0	0	11.7856	0	0	0	2.35232	0.922662	0	0.359892	0	0
LOC111556764	0	0	0	0	0	0	0	0	0	0	0	0	0	0	0	0	0	0	0	0	0	0	0	0	0	0.23457	0	0	0	0	0	0	0	0	0	0	0	0	0	0.17931	0	0	0	0
LOC123384347	0	0	0	0.0631292	0	0	0.0555891	0	0.0279724	0	0	0	0	0	0	0	0.0236186	0	0	0	16.847	55.537	0	0	0	0.0950837	0	0	0	0	0	0	0	0	0.132632	0	0	0	0.154423	0.0581471	0	0	0	0.0532374
LOC123383734	0	0	0	0	0	0	0	0	0	0	0	0	0	0	0	0	0	0	0	0	1.91809	5.20484	0	0	0	0	0	0	0	0	0	0	0	0	0.350337	0	0	0	0	0.153591	0	0	0	0
LOC123384349	0	0	0.12529	0	0	0	0	0	0	0	0	0	0	0	0	0	0	0	0	0	0.0447487	0.0170226	0	0	0	0.0966802	0	0	0	0.504553	0	0	0	0	1.65509	0	0	0	0.142741	0.321148	0	0	0	0.108263
LOC123384350	0	0	0.682283	0.317773	0.201266	0	0.0839454	0	0	0.285793	0.0833582	0	0.107725	0	0	0	0	0	0.818114	0.139928	0	0	0	0	0.187964	0.0598277	0	0	0.070119	6.18211	0	0	0	0	0.667629	0.328748	0	0	0	1.15614	0	0.0111492	0	0.750345
PCDH17	0	4.61965	10.736	3.46454	1.2493	0.632495	2.22975	0.0424708	0.0235374	4.24876	16.5216	14.8911	7.65542	0.813913	0.0968721	2.62864	1.14811	1.73209	6.13029	2.2592	0.917145	1.98416	1.11077	0.0261561	9.87445	0.132955	0.371302	0.0397119	1.95299	2.25091	1.4774	0.501946	0.592755	0.451458	7.53654	9.68849	0.194208	16.2637	0.790146	1.62218	0.582727	1.07034	0.653185	0.734096
LOC111559874	0	0.198365	5.77363	1.1818	0.46782	0	0.195121	0	0	0.913404	2.71259	4.21712	0	0.0544394	0.0603095	0.508272	0.0829028	1.70036	0	4.44659	0.0849626	0.00538668	0	0	2.07527	0.139063	0	0	0	0.612039	0.207566	0.0825396	0	0.0168256	2.09497	12.4809	0.125773	1.3321	0	0.250873	0	0.0025915	0.0816936	0.020763
LOC123380939	0	14.652	8782.74	200.423	27.456	19.7661	10.9618	0.19602	1019.59	13.1631	14.1347	16.0775	1.74032	9.37711	3161.89	143.148	0.68918	3601.82	24.9758	3.35146	7.81449	9.07229	0	2.20894	13.3491	1440.94	1759.34	0.10285	3.1829	332.482	11.9683	9.94595	16.0644	0.542983	938.04	3.19353	234.263	5.238	14.1828	3733.27	46.5667	24.326	206.94	1.21729
LOC123384353	0	0.0891499	0.107388	0	0.118265	0.0287972	0.0328846	0.00351576	0.00551583	0.0399843	0.18893	0.0169221	0.0397885	0.0126304	0.0328521	0.0673051	0.0106453	0.00451733	0	0.0127529	1.76227	2.08984	0	0	0.0210378	0.117853	0.0472087	0.0014918	0.00784807	0.995614	0.00999482	0.0576301	0.0288949	0.0129631	4.12292	0.183975	0.0565253	0.10263	0.604657	0.946758	0.0210566	0.0188429	0.110145	0.351926
LOC111559877	0	0.14445	0.0667141	0.0113635	0.268547	0.0882685	0.0355221	0.0190957	0.0275673	0.0396021	0.993748	0.018923	0.165068	0.0106595	0.0538726	0.373385	0.00495999	0.0129895	0	0.00725551	0.0774466	0.0488116	0.00225983	0.000301969	0.0168038	0.0419327	0.00754153	0.026977	0.00250744	0.233557	0.171641	0.699999	0.634228	0.0687261	0.709961	0.140092	0.100941	0	0.0597627	0.121675	0.0470926	0.0556575	0.295354	0.101898
LOC123384356	0	0.571828	0.133935	0	0.189645	0.0808114	0.0703098	0	0	0.89764	1.09963	1.32964	0.108272	0.0267499	0.236334	0.618131	0	0.0253533	0	0	0.42096	0.1514	0	0	0	0.135296	0.100936	0.00669813	0	0.546558	0.168286	0.178453	0.259474	0.0363775	1.8453	0.0688369	0.0453208	0	0.92775	0.533202	0	0.00980509	0.176624	0.763134
LOC111559879	0	1.08464	0.203237	0	0.329741	0.0574808	0.383418	0.112283	0	0	0.844241	0.900731	0.410739	0.215641	0.229934	0.260548	0	0	0	0	0.903726	1.05757	0	0	0	0.128314	0	0.0190574	0	0.300099	0.212803	0.803909	0.0615209	0.0345002	1.11368	0.522277	0.107455	0.728376	0.277855	0.283359	0	0.0106275	0.502528	0.138364
LOC109498269	0	0	0	0	0	0	0	0	0	0	0.0714597	0	0.0738787	0.0438063	0	0	0.0407674	0.0691987	0	0.0342729	0	0	0	0	0	0.102576	0	0.00914084	0	7.30178	0	0	0	0.0248219	5.89502	0	0	0	8.19625	4.62939	0	0.0229386	0	10.3991
LOC123383760	0	0	0.453643	0	0	0	0.297677	0.0161513	0.149791	0	0.886783	0	0.1528	0.151005	0	0.775419	0.0843175	0.250461	0	0	0.259237	0.082179	0	0	0	0.297015	0.284894	0	0.0621618	0.405967	0	0	0	0	0.355119	0	0.127919	0	0.275642	0.285427	0.667126	0.134422	0	0.443464
LOC123383769	0	0	0	0	0	0	0	0	0	0	0.127179	0	0	0.0129939	0	0	0.0181388	0	0	0	2.32368	10.0451	0.0192833	0	0	0.0912789	0	0	0	0.0698669	0	0	0	0	0.30558	0	0	0	0.296487	0.117223	0	0	0	0.790457
DIAPH3	0.0355006	6.32612	0.349513	0.181828	0.723664	0.97235	4.60211	7.28056	0.129561	9.42506	0.660671	1.84128	1.74257	3.63814	0.0321004	1.74156	0.215421	0.0608559	0.450725	0.60869	9.24231	3.44019	13.5482	0.013059	0.247079	0.323827	0.223641	2.89665	0.474413	14.5496	1.16003	4.33286	4.67912	1.49895	35.6771	0.652447	0.620627	0.212707	26.0645	14.4268	9.9065	2.11042	1.89148	9.33839
LOC123384365	0	0.0764323	0	0	0	0	0.105256	0.00421992	0	0.172773	0.022397	0.0406226	0	0	0	0.0293765	0.00425912	0.00813312	0	0	0.0180054	0.0205479	0	0	0	0.057869	0	0.00501363	0	1.43341	0.0839764	0.0954104	0.083237	0	3.82979	0	0.0145385	0	0.0835408	0.891606	0.278012	0	0.0188865	0.108003
LOC109498288	0	0	0.108593	0	0	0	0.142515	0	0	0	0	0	0	0.0216884	0	0.278428	0.0403677	0	0	0	0.015514	0	0	0	0	0.243768	0	0.0407305	0	11.0785	0	0.271288	0	0.0737357	19.8069	0	0.0459317	0	28.1087	10.4724	0.479088	0.0170353	0.71602	8.53039
LOC123384367	0	0	0	0	0	0	0.0575705	0	0	0	0	0	0	0	0	0	0	0	0.526003	0	0.150409	0.200256	0	0.173737	0	0.123091	0.0826475	0	0	1.36614	0	0	0	0.0297863	7.28007	0	0	0	0.319854	1.1931	0	0	0	2.33405
LOC101097038	0	0.0713922	0.0802641	0.0398751	0.0631388	0	0.0175562	0	0	0	0	0	0	0	0	0	0.0149185	0	0	0.0301005	0.0917349	0.0135805	0	0.00354975	0	0.0450442	0.050407	0	0.0439937	0.158023	0	0	0	0.0136251	0.272273	0	0	0	0	0.127401	0	0	0	0.044836
TDRD3	0.0354179	8.51378	5.88271	5.57823	7.15919	2.23673	4.89572	2.59631	0.928825	8.46735	5.39544	4.00485	7.35886	1.86503	1.49903	5.50178	3.21907	3.58912	4.54828	6.27101	5.61061	1.75768	3.03226	0.347651	3.93947	1.81222	0.893302	1.48535	4.07211	12.6455	4.02964	3.87778	4.22496	2.41888	21.7661	4.70771	2.5869	4.19552	20.346	10.409	10.1148	3.40732	6.7949	8.9743
LOC123384375	0	0.801855	1.20299	0.373967	0.850986	0.0271966	0.470289	0.0343103	0.0436584	1.72194	0.434691	0.106543	0.286952	0.158144	0.479505	0.362123	0.0714922	0.808454	0.0648585	0.210128	0.0798512	0.0176375	0.0774875	0	0.145702	0.345713	0.232124	0.160237	0.331063	1.21659	0.402743	0.50298	0.5385	0.0428491	3.36859	0.0154444	0.0610097	0	0.178025	0.527421	0.88825	0.0241988	0.485441	0.235426
LOC123384377	0	0.0271284	0.254163	0.0909131	0	0	0.190129	0	0	0.136273	0.0596208	0	0.0102732	0.0131982	0	0.0651668	0.171012	0.00962239	0	0.0571896	0.043573	0.00221005	0	0	0	0.09414	0.0191542	0	0.0585102	0.676898	0	0.0169322	0	0.0207096	1.13011	0	0.00860034	0	1.00074	0.712647	0.0448527	0.00212648	6.5191	0.504729
LOC123384379	0	0	0.00784312	0	0	0	0	0	0	0	0	0.027808	0	0.00391613	0	0	0.000728891	0	0	0.00147066	0.361922	0.553263	0	0	0	0.0462163	0.0295535	0	0	1.81086	0	0	0	0.00133139	10.2687	0	0.00995228	0	1.32246	2.01845	0	0	0.129287	0.663754
LOC111557080	0	0	0.310554	0	0	0	0	0	0	0	0	0.734054	0	0	0	0	0	0	0	0.0388212	0.0887343	0	0	0	0	0	0	0	0	1.334	0	0	0	0	3.88972	0	0	0.741991	0.566096	1.50989	0	0.96353	0	0.216847
LOC109492570	0	0	0.0336287	0	0	0	0.00551672	0	0	0	0	0.0298079	0	0	0	0	0.00078131	0	0	0.00315284	0.0312282	0	0	0	0	0.0283086	0	0	0.062209	1.6567	0	0	0	0.00285429	6.25221	0	0.00711201	0	2.5363	1.56166	0.0370907	0.0101113	0	1.46348
LOC123384380	0	0.0297887	0.631855	0	0	0	0.017581	0	0	0	0	1.51198	0.00902449	0.0584158	0	0	0.0427437	0	0.449769	0.0117223	0.633481	1.30075	0	0	0.118098	0.0476137	0	0.00055829	0.0587411	0.151053	0	0	0	0.00606414	0.674651	0.0688508	0.00755499	0.288062	0.105817	0.232557	0.118203	0.0681824	0.0588866	0.086057
PCDH20	0	5.99417	21.0727	3.24823	6.29377	2.09072	8.79406	0.0140828	0.0315632	6.67873	0.934295	72.0196	12.7164	0.0840023	0.0930601	0.833303	2.22621	0.262373	19.0154	6.45799	1.75211	0.970411	0.118995	0.0189292	18.7288	0.0616916	0.00900474	0.00239023	6.08292	2.68436	3.36297	2.74624	2.54632	1.7541	1.78093	11.2014	8.88287	22.7816	1.43753	2.67039	0.0421722	37.3892	6.74403	3.0176
LOC109498314	0	0.208928	0.579399	0	0.0492732	0	0.205512	0	0	0	0	1.09191	0.0738439	0.159505	0.00635211	0	0.0358972	0.0494043	0.200288	0.0469806	0.797925	0.0453882	0	0	0.13805	0.0527284	0.0196687	0	0	5.45414	0.0437238	0.104322	0	0.0177216	1.11961	0.160966	0.19429	0.374142	0.285449	0.792698	0	0.276226	0.309758	0.288666
LOC109492573	0	0	0	0	0	0	6.36226	0	0	0	0	0	0	0	0	0	0	0	0	0	0.105203	0.0133399	0	0	0	0.0516573	0.115615	0	0	0.560145	0	0	0	0	0.67253	0	0	0	0.11186	0.163217	0	0	0	0.102837
LOC123384385	0	0	0.402049	0	0	0	0.0263821	0	0	0	0	0.712738	0	0.0401492	0	0	0	0	0	0	4.54912	4.92494	0	0	0.354436	0.157941	0	0	0	1.20891	0	0	0	0	4.68949	0.206636	0.0680223	0	0.952741	0.807187	0	0	0	0.850623
TRNAQ-UUG_1	0	0	0	0	0	0	0	0	0	0	0	0	0	0	0.00991116	0	0.0484412	0	0	0	0	0	0	0	0	0.146261	0	0	0	0.559757	0	0	0	0	0	0	0	0	0	0.0894439	0	0	0	0
LOC123384387	0	0.0853737	0.326342	0.0762948	0	0	0.00839778	0	0.0084515	0.171542	0	0	0.012932	0.020448	0.000973366	0	0.0130828	0	0.0306911	0.00119985	0.547588	4.57435	0	0	0.169232	0.122095	0.0843902	0	0	0.542861	0	0	0	0.0369318	1.59792	0	0	0.0229327	0.594875	0.535837	0	0.00401526	0	0.419551
LOC111556957	0	0	0	0	0	0	0	0	0	0	0	0	0	0	0	0	0	0	0	0	0	0	0	0	0	0	0	0	0	0	0	0	0	0	2.00096	0	0	0	0	0.255861	0	0	0	0
LOC123384391	0	0.102095	0.229564	0	0.0451459	0	0.0251063	0.0105689	0.0379004	0	0	0	0	0.242618	0.01164	0.220723	0.0622248	0	0	0.0143484	0.319765	0.513591	0	0	0.0843239	0.0805194	0	0.00358766	0.0629133	1.15559	0.0801226	0	0	0.0373454	4.46271	0	0.0121374	0	0.540513	1.54451	0	0.0185064	0	0.352648
LOC111556975	0	0	0	0	0	0	0	0	0	0	0	0	0	0	0.0648037	0	0	0	0	0	0	0	0	0	0	0	0	0	0	0.914987	0	0	0	0	8.00385	0	0	0	0.776568	2.41241	0	0	0	0
LOC123384399	0	0	0.157113	0	0	0	0	0.0289334	0.0518778	0	0	0	0	3.05945	0	0.302125	0.0292022	0	0	0.0589202	0	0.102462	0	0	0	0.0881716	0	0	0	0.632704	0	0	0	0.0666759	3.32074	0	0.0332272	0	1.14558	1.30082	0	0.00410781	0	0.411394
LOC111559890	0	0	0.870637	0	0	0	0.0761741	0	0	0	0	0	0	2.53488	0.697503	0.0744097	0.0755175	0	0	0.00362783	0.0497532	0.420584	0	0	0.255844	0.0651468	0	0	0.127255	0.768749	0	0	0	0	4.14988	0.0994378	0.0327339	0	0.141071	0.683914	0	0	0	0.178326
LOC109498326	0	0	0.0416799	0	0	0	0	0	0	0	0.0407381	0	0	0	0.0126803	0	0.00387348	0	0	0	0.0119091	0.00906057	0	0	0	0.116954	0	0	0.137072	2.32749	0	0	0	0	3.49117	0	0.035259	0	8.20547	1.14077	0	0	0	0.960411
LOC111556747	0	0	0	0	0	0	0	0	0	0	0	0	0	0	0	0	0	0	0	0.0399411	0	0	0	0	0	0	0	0	0	0.228747	0	0	0	0	5.3359	0	0	0	0.776568	0	0	0	0	0
LOC123384401	0	0	0.250315	0	0	0	0	0	0	0	0	0	0	0	0	0	0	0	0	0	0.0178805	0	0	0	0	0.561907	0	0	0	3.76334	0	0	0	0	8.8178	0	0.0529383	0	4.33474	3.61881	0	0	0	3.51317
LOC109492581	0	0.0722208	1.53595	0.121014	0.127743	0	0.12432	0.019937	0	0.0906961	0	0.191921	0.0820474	0.0270277	0.48581	0	0.0226375	0	0.0973603	0.559516	0.152733	0.238284	0.0160439	0.13935	0.1193	0.0379725	0	0	0.155765	0.029065	0	0	0	0.0735105	0.44493	0.347759	0.240405	0	0.296016	0.181128	0	0.0283055	0	0.0226782
LOC111559810	0	0	0.766944	0.087927	0	0	0	0	0	0	0	0	0	0	0	0	0.219308	0	0.0707407	0	0	0	0	0	0	0.0496625	0	0	0.0970088	2.75593	0	0	0	0	2.44769	0	0	0	3.54884	2.66754	0	0	0	0.395465
PCDH9	0.00116478	2.06046	35.5305	12.2234	0.929477	0.12749	2.03653	2.16115	2.20472	1.60646	0.169184	10.1119	1.25479	0.278325	0.136332	0.429077	1.02432	0.113114	6.53478	7.89268	0.472173	0.568302	1.00785	0.007766	13.388	0.0810143	0.0974538	0.012131	4.0515	1.98483	0.187614	0.143581	0.193214	0.252056	3.35739	23.3	0.236804	11.2148	1.13455	1.34222	0.0447459	0.0810382	0.143781	0.892257
LOC109498345	0	1.06032	76.1195	4.66378	1.58243	0	0.912609	0.0365884	0.0328017	2.33024	0	2.4655	0	0.0396811	0.226668	1.14618	0.0369283	0.211552	1.84632	0.526219	0.219979	0.17276	0	0	3.6125	0.0836246	0	0	0.530884	18.9357	0.364055	0.165449	0	0	20.88	2.29755	0.504219	4.45028	100.094	21.0432	0	0.0519462	0.327507	27.1721
LOC123384416	0	0	0	0	0	0	0	0	0	0	0.0386994	0	0	0.0395392	0	0	0	0	0	0	2.77879	9.75888	0	0	0	0.0277752	0.0372984	0	0	0.0744092	0	0	0	0	0.325447	0	0	0	0	0.120597	0	0	0	0.0974553
LOC123384417	0	0	0	0	0	0	0	0	0.0101559	0	0	0	0	0.144359	0.00233932	0.197152	0.00285839	0	0	0.00360454	0	0	0	0	0	0.0323643	0.014487	0	0	1.46157	0	0	0.0372414	0	2.6786	0	0.0520379	0	4.05778	1.16772	0	0	0	0.644294
LOC109492584	0	0	0	0	0	0	0	0	0	0	0	0	0	0.0507496	0.0140554	0	0	0.0218636	0	0	0	0	0	0	0	0.0194456	0.0435213	0	0	3.42333	0	0	0	0	4.44844	0	0	0	4.14764	2.23167	0	0	0	1.50007
LOC123384422	0	0	0	0	0	0	0.020306	0.0113975	0	0	0	0	0	0.0193139	0.00470724	0	0.00287585	0	0	0	0	0.00504525	0	0.00306398	0	0.0586117	0	0	0	1.6782	0	0	0	0.00525304	6.90396	0	0.00654449	0	0.705108	0.943206	0	0	0.0510103	0.204193
LOC123384424	0	0	0	0	0	0	0.0162057	0	0	0	0	0	0	0.0369936	0	0	0.00803304	0.0058437	0	0.00231542	0.00705653	0	0	0	0	0.0727637	0	0	0	2.49964	0	0	0	0.00838467	10.957	0	0.020892	0	1.36181	1.60615	0	0	0	0.447498
LOC123384429	0	0	0	0	0	0	0.020553	0	0	0	0	0	0	0.0159234	0	0	0.00185235	0.00269501	0	0	0	0.000618983	0	0	0	0.0239695	0	0	0	1.01978	0	0	0	0.00193343	4.89713	0	0	0	0.469734	0.646672	0	0.000297789	0	0.142556
LOC123384428	0	0	0	0	0	0	0	0	0.00581923	0	0	0	0	0	0	0	0	0	0	0.00330459	0	0	0	0	0	0.0395615	0	0	0	0.454218	0	0	0	0	2.95236	0	0	0	0.128501	0.182962	0	0	0	0
LOC101080351	125.179	121.127	14.6887	24.3642	68.3571	94.4086	143.229	19.9795	67.1961	164.033	44.5655	17.8828	68.1987	20.9952	26.6247	84.9156	102.6	28.8982	22.1433	52.8864	93.5379	63.7138	4.37002	38.0729	25.8334	62.4816	37.223	9.3659	31.6386	12.68	80.0071	97.6301	116.71	8.2719	15.4805	25.5594	170.667	13.8046	36.3165	30.14	160.424	66.0719	149.592	8.15629
LOC109492592	0	0	0	0.00200101	0	0.000506296	0.00100875	0	0	0	0	0	0	0.0310381	0.00040846	0	0.000124773	0.000476527	0	0	0.0120591	0.0206258	0.00159175	0	0	0.0139391	0	2.09824e-05	0	0.517908	0	0	0.000650257	0.000546985	3.22135	0.0103506	0.00113577	0	0.127875	0.291265	0	0	0.00294349	0.0531552
LOC111557037	0	0	0	0	0	0	0	0	0	0	0	0	0	0.100555	0	0	0	0	0	0	0.287714	0.218895	0.0994841	0	0	0	0	0	0	1.26157	0	0	0	0	15.2396	0	0	0	0	2.99502	0	0	0	0.421866
LOC123384433	0	0.26508	0.0993403	0	0	0	0	0.256119	0	0	0.873859	0	0.100382	2.9364	0.0226668	0	0	0	0	0.214213	0.113537	0.0755826	0.206106	0	0	0.0836246	0	0	0	1.70688	0	0	0	0.0674533	7.93206	0	0	0	3.66693	2.52714	0	0.171423	0	0.978049
LOC123384432	0	0.287653	0.736633	0	0.423998	0	0	0.0264695	0	0	1.12388	0	0	0.254773	0.024597	0.276396	0.0567701	0.119035	0.689392	1.4419	1.01645	0.00781134	0	0	2.37584	0.0403315	0	0	0	0.617412	0	0	0	0.0121996	0.872006	0	0	0	0.442134	0.423916	0	0.00563699	0	0.466687
LOC101100024	0	0	0.72746	0	0	0	0.0227311	0	0	0	0	0	0	0.0761045	0.0737719	0	0.0128773	0.0491803	0	0	0.0247448	0	0	0	0	0.0291607	0.065265	0	2.44934	203.737	0	0	0	0.0235216	390.018	0.0890198	3.3114	0	751.984	254.818	0	0	0	240.121
LOC111559836	0	0.110698	0.933408	0	0	0	0.027222	0	0.0273962	0	0	0	0	0.0248564	0.0631048	0	0	0	0	0	0	0	0	0	0	0.151328	0.0390796	0	0	2.71755	0	0	0	0.00704218	12.6003	0	0	0	1.87162	2.31535	0	0	0.136768	1.50339
LOC123384434	0	0.262723	0.787658	0	0	0	0.0646069	0	0	0	0	0.0872709	0	0.0344123	0.0561632	0	0	0	0	0	0.0492311	0	0	0	0.433987	0.179576	0	0	0	2.55078	0	0	0	0	7.34131	0	0	0	2.51263	2.11187	0	0	0	1.1292
KLHL1	0	1.3709	5.75047	2.41239	0.00936227	0.0239366	0.380075	0.00584471	0.00523981	0.771063	0.0426532	0.520437	0.30467	0.00237703	0.00181042	0	0.222319	0.0056323	1.24634	1.34235	0.15983	0.101764	32.5146	0.03221	4.38048	0.0322827	0	0.00198401	4.66751	0.404731	0	0	0	0.131995	0.413045	9.58318	0.00671209	4.94074	0.357967	0.247456	0	0.212844	0	0.257623
LOC123384439	0	0.0927695	0.166877	0.020726	0	0	0.00912527	0.0102438	0.00918364	0	0	0	0	0	0.00211538	0.0356556	0.010339	0	0	0.00782273	0.00397345	0	0.226696	0	0	0.120966	0	0	0	0.470417	0	0	0	0	1.15393	0.0357364	0	0	0.735132	0.476066	0	0.00436309	0	0.323351
LOC123384441	0	0.0535442	0	0	0	0	0	0	0.0132514	0	0	0	0.0202765	0.00200382	0	0	0.00745925	0	0	0	33.6452	214.186	0	0	0	0.168916	0.0378052	0	0.0329953	0.172389	0.0420208	0	0	0.00340627	1.64934	0	0	0	0.073155	0.15839	0	0	0	0.254304
LOC111556923	0	0	0	0	0	0	0	0	0	0	0	0	0	0	0	0	0.0374319	0	0	0	0	0	0	0	0	0	0	0	0	0.21627	0	0	0	0	1.89182	0	0	0	1.46842	0.207347	0	0	0	0
LOC123384442	0	0.0980311	0.0367378	0	0	0	0	0	0	0	0.287261	0	0	0.0293495	0	0	0.00682837	0	0	0.0137773	0.561591	3.20447	0	0	0	0.0412345	0	0	0.120819	0.749592	0	0	0	0.0249454	2.70334	0	0	0	0.401806	0.895181	0	0	0	0.207785
DACH1	0.0265249	34.0466	2.6858	11.5874	2.70193	2.64112	10.5932	0.00972203	0.00145264	35.5658	9.04275	3.9073	64.4346	1.64659	0.129157	9.02948	3.58048	2.12045	1.23967	8.79819	3.61015	5.02537	5.36959	0.145488	3.08328	0.258001	0.203069	0.0143008	30.8168	8.2661	8.07731	12.2874	13.349	3.46106	9.35186	7.60285	2.78562	3.51597	15.9666	7.01104	4.01766	1.81818	14.134	8.12772
LOC123384451	0.0210769	1.28307	0.773259	0.182352	0.470643	0.0221466	0.358075	0	0	2.01721	0.67925	0.190872	0.362867	0.0405643	0.0446675	0.840729	0.0477563	0.788615	0.0704203	0.176616	0.0811053	0.0260653	0.0116045	0.0019383	0.0647169	0.0741564	0.0599338	0.00061188	0.716223	1.25216	0.725099	0.912904	0.782205	0.054416	5.536	0.0880364	0.0952222	0.0175396	0.401451	0.838648	0.388647	0.00806134	0.822874	0.263649
LOC123384448	0	2.11766	1.29863	0.355435	0.359435	0.0120917	0.326132	0	0	6.15154	1.30063	0.227375	0.117455	0.0552354	0.101819	0.986565	0.0659307	1.50416	0.0576728	0.0548639	0.0355023	0.0753677	0.0142557	0.00317485	0.141338	0.06973	0.0755147	0	1.2061	1.72674	0.637907	1.00132	1.47534	0.0381019	3.21921	0.1545	0.115282	0.0574583	1.26398	0.834505	0.954882	0.0188631	1.07034	0.286022
LOC123384452	0.00212246	3.18578	1.39472	0.558234	0.523371	0.0223018	0.616065	0	0.00325463	8.64146	1.14162	0.384419	0.145666	0.0777599	0.108703	1.14989	0.0774036	1.85183	0.0709138	0.0997252	0.0708801	0.0755298	0.00292145	0.00195188	0.217235	0.210891	0.143921	0	1.15075	1.28607	0.995935	1.81398	1.76036	0.0535425	2.39195	0.0633238	0.189695	0.0971438	0.134755	0.646528	1.17411	0.00515418	2.4778	0.147114
LOC109492597	0	0.13352	0	0	0	0	0.0477587	0	0	0.152433	0	0	0.216038	0.0826743	0	0	0.00253645	0	0	0.000852951	0.0363926	0.0019777	0	0	0.0401015	0.0459506	0	0	0	0.0781591	0	0	0	0.00308873	0.669452	0	0	0.13042	0.0331676	0.06869	0.0802743	0.00190292	0.929797	0.0419268
LOC109492600	0	0.0481374	0.0360796	0	0.0851448	0.081634	0.0591879	0.301253	0.297833	0.0604518	0	0	0.492184	0.713387	0.095139	0.0925072	0.0603543	0.068297	0	0.179279	1.44841	1.34118	0.0641624	0.0285788	0	0.192355	0	0.169158	0	0.0968635	0.264444	0.18027	0.0873717	0.0857448	0	0	0	0	0.065768	0.123823	0	0.715039	2.26001	0.0151157
MZT1	0.717455	18.0672	25.4292	52.8827	11.0408	3.24881	8.81173	9.82612	12.9217	19.1801	20.5086	21.2286	34.8845	23.0455	1.91297	8.65466	20.5731	13.8173	42.2489	19.7515	6.71675	11.7275	27.2549	1.00854	33.4727	7.84998	5.9747	19.0495	28.6947	19.2043	15.2338	14.4311	13.4812	8.25228	38.723	37.0823	9.46738	20.9251	20.95	11.7332	27.579	21.1999	8.53917	15.9398
BORA	0.0242563	8.92191	1.76906	2.20734	1.9847	1.40953	5.76305	1.95187	0.674586	9.57426	0.815746	1.61118	4.76266	1.90594	0.271632	2.63878	1.11301	0.399814	1.70068	4.32453	4.94753	10.4306	3.58991	0.12066	1.43881	2.78837	2.42376	3.07679	2.36797	12.266	2.00511	3.34926	3.65474	3.55409	30.0478	1.32896	2.60755	1.01845	12.8639	13.8678	13.6215	3.2922	4.22438	8.06073
DIS3	0.0687487	18.4522	5.96694	9.65733	5.71934	2.62319	9.77039	9.35205	5.33494	18.6904	4.208	6.37166	12.5051	7.3417	1.63835	6.91466	4.71115	2.25605	5.75984	10.3169	11.3152	10.576	12.2516	0.329529	6.65266	6.13431	4.8987	15.3518	10.4798	28.1273	6.80239	8.29024	8.00681	6.72452	71.2544	4.75489	6.57511	5.59973	53.1234	29.3005	23.3051	6.6012	8.10559	21.3262
PIBF1	0.0154557	4.71902	2.80924	1.32084	1.90323	0.246609	2.69183	1.40479	1.08955	6.10996	1.24913	1.66829	2.12651	1.68579	0.442037	1.90805	1.21976	0.619429	1.01485	2.28433	3.07613	2.96934	1.99206	0.135818	1.8807	0.942121	0.679902	0.838493	2.67193	5.70226	1.57824	1.4428	1.7623	0.82785	16.4512	1.18867	1.20088	1.2183	5.08994	4.89429	5.55916	1.45788	2.75086	2.41319
KLF5	0.041184	15.9584	2.262	1.81994	22.1511	115.675	86.348	4.00713	1.34078	13.2373	1.53144	3.05151	13.1011	72.7436	0.350799	32.1672	17.1236	4.18613	9.12047	14.3551	2.56846	0.784359	8.23605	0.958508	10.6515	1.07953	0.886988	2.10289	2.3466	68.6022	127.558	266.567	323.739	134.028	30.2723	2.45747	18.8957	9.12169	95.1242	23.0389	10.4501	108.626	106.053	18.0567
LOC123384472	0	0.0320177	0.0449957	0	0.219451	0.0557906	0.0610201	0	0	0.0804168	0	0	0.00606236	0.0113831	0	0.0538383	0.00892079	0.026972	0.0503567	0.0075934	0.0728538	0.181933	0.000889093	0.00237609	0	0.0622872	0.0395611	0	0	1.60262	0.339216	0.564544	0.588402	0.117119	1.1976	0	0	0.0215012	0.120297	0.319912	0	0.0796842	0.356023	0.0377023
LOC109498494	0	0	0.0595508	0.0110943	0.33377	0.737252	0.0781535	0	0	0	0.0145513	0	0.0676974	0.0371677	0	0	0.0249043	0.0281817	0.160664	0.135392	0.00850768	0.0388362	0.0176504	0.0117926	0.492173	0.0835497	0	0	0.0244804	1.46287	0.530004	0.743855	0.937367	0.229978	0.734224	0	0	0	0.407072	0.950776	0	18.4208	0.0981641	0.165288
LOC123384478	0	0.359937	0.254213	0.193306	1.04068	0.826858	0.136174	0	0	0.278163	0.19269	0.257521	0.193971	0.162678	0.00473507	0	0.0192857	0.0622141	0.261277	0.66637	0.108213	0.135336	0.00615077	0	0.571704	0.0815226	0	0.0090809	0.409482	0.813417	0.478033	0.708526	0.879446	0.162046	0.430496	0	0.0351104	0.297491	0.302625	0.523164	0.45777	7.46694	0.068416	0.244177
LOC123384475	0	0.229958	0.288951	0.0302211	0.38282	0	0.059876	0	0	0	0.0594571	0	0.010245	0.0202491	0.038556	0	0.0122489	0.0607905	0.0486282	0.00855488	0.0463503	0.0110199	0.0450752	0.00401542	0.0223449	0.130865	0.0382032	0.00380276	0.0333426	2.2592	0.0424631	0.101314	0	0.0912163	7.91558	0	0.00857673	0	1.14584	1.80355	0.223648	0.0196159	0.133701	0.995006
LOC123384476	0	0.0656808	0.352805	0	0.580877	0	0.0969103	0	0	0.0549887	0.0962324	0.0581806	0	0.0557152	0.034946	0.0841473	0.019825	0.067328	0	0.0138462	0.0539198	0.0321046	0.0243183	0.00649904	0.0361656	0.340734	0	0.0123097	0.107931	2.59043	0.343637	0.300627	0.317904	0.217275	4.2306	0	0.0138816	0	2.57245	2.61402	0.361978	0.0780848	0	2.52135
LOC123384482	0.00986602	0	0.733084	0.136573	0.594693	0	0.0901958	0	0.0605152	0	0.0895648	0.0812242	0	0.0366034	0.0348479	0.117476	0	0.151779	0	0.103095	0.111277	0	0.01358	0	0	0.102852	0	0.00572839	0.0753398	1.47609	0.479741	0	0.110954	0.00777771	5.0454	0	0	0	0.584635	1.26188	1.61711	0.0263545	0.151053	0.723001
KLF12	0.00062235	1.23221	2.18543	1.2601	1.00331	0.144738	0.634671	0.371137	0.202432	1.33049	0.289409	0.795188	0.369554	0.0512474	0.502408	0.341618	0.179919	0.491313	0.77525	0.651294	0.566728	0.138861	0.346422	0.0032623	1.04996	0.281366	0.180238	0.0627209	0.425582	0.731901	0.344837	0.23442	0.253451	0.06982	0.412981	0.832957	0.309469	0.82502	0.125125	0.256156	6.98241	0.244206	0.62316	0.31553
LOC109498473	0	0.259409	5.60202	1.66622	14.2813	0.806518	0.103662	0.0358056	0.505574	0.32577	0	4.78242	0.503453	0.0485402	0.122	0	0.0383969	0.0575074	0.291422	1.9049	0.204856	0.0528326	0	0	1.9283	0.211409	0.183157	0	0.679381	2.24456	0.305371	0.283342	0.294274	0.41669	3.31042	4.40311	0.277556	2.26464	0.310116	0.998823	0	0.983656	0.641001	0.473471
LOC123384496	0	0	0	0	0	0	0	0	0	0	0	0	0	0	0	0	0	0	0	0	0.0258356	0	0	0	0	0.0253718	0	0	0	0.776806	0	0	0	0	3.96381	0	0	0	0.164823	0.465473	0	0.00945634	0	0
LOC123384500	0	0	0.199191	0.0424105	0.10073	0.0858459	0.0560175	0	0.150336	0.190712	0.0556257	0	0	0.0227331	0.114707	0.29184	0.00528902	0.181796	0	0.114718	0.162613	0.00773232	0.0253023	0	0	0.151709	0	0.00355771	0.046791	0.542411	0.178771	0.0473927	0.137819	0	2.50602	0.219376	0.0240721	0	0.363097	0.700701	0	0.0252959	0.187628	0.190748
TBC1D4	0.0234827	2.12629	3.43637	3.20498	2.66054	1.34433	1.93866	4.00927	2.93835	1.80893	5.16222	1.81327	1.60204	1.23118	1.11905	2.33619	1.60519	3.68314	1.70309	1.76542	0.849101	0.185694	3.53565	0.134338	1.84653	2.24375	1.61464	0.622907	1.09942	1.37868	2.66722	2.72502	2.35402	0.5726	1.29849	2.03128	0.52489	1.21023	0.69439	1.08403	8.75475	1.32907	1.15917	0.9452
COMMD6	4.46574	46.7642	47.498	34.5173	37.3132	21.6522	47.2086	37.687	53.1842	35.179	35.7661	30.8402	156.177	63.6409	10.3245	41.3087	56.1	25.8237	39.7676	89.098	72.0142	322.26	35.1285	3.75046	39.8521	21.4497	14.7734	57.5953	31.0015	43.2079	28.8934	38.4652	27.2901	57.8335	96.4022	34.6854	44.5124	42.2303	45.771	96.24	62.3834	81.5452	54.1045	61.772
UCHL3	2.76392	29.6143	41.6235	62.6021	21.4369	70.1562	31.7168	75.4801	86.1237	26.8919	38.1993	68.6488	49.7907	14.9786	6.75363	19.9355	35.8899	21.4194	52.2539	57.2431	37.834	176.258	57.8254	6.15019	72.8523	8.87926	7.14029	21.2002	32.1413	70.0571	30.4043	53.6518	57.8012	24.5724	112.721	76.267	17.6837	61.6853	160.121	91.1098	61.467	34.8284	16.4327	91.7983
LMO7	0	1.55108	4.78021	0.937122	1.10237	1.31671	0.77817	9.75527	4.51576	1.07278	10.151	2.8592	1.41977	1.7979	1.08289	8.82329	4.07673	4.21868	3.93661	0.268863	2.05272	1.32758	3.20953	0.0458717	3.60382	0.0156186	0.0156989	0.0106053	0.0575463	0.91898	3.42392	5.48779	4.6039	3.45794	1.18768	0.171303	0.671476	2.47204	1.53257	0.822986	0.485986	1.97497	0.697211	1.03926
LOC109498550	0	0.0782796	0.150643	0.00709005	0.0187108	0.00597976	0.0400606	0.0766555	0.0845608	0.0876773	0.226283	0.0224889	0.00160235	0.0356688	0.0842132	1.25581	0.0282576	0.0990558	0.00380282	0.00698742	0.0262789	0.0285248	0.00822491	0	0.0174741	0.0302568	0.00448134	0	0.00782237	0.486385	0.0556217	0.10762	0.127681	0.129947	1.66369	0.0244497	0.0159295	0.0028415	0.473326	0.442408	0.0174897	0.016418	0.00261391	0.197892
LOC123384529	0	0.0490868	0.133368	0	0.043412	0.013874	0.0362131	0.185475	0.306744	0.015411	0.0179799	0	0	0.0259478	0.195353	3.16011	0.0658185	0.200226	0	0.00258701	0.00394211	0.00199946	0.00817847	0.0018214	0.0405427	0.125174	0.00866451	0	0	0.321015	0.028892	0.130209	0.155916	0.167455	0.687618	0	0.0155617	0	0.0167663	0.227277	0	0.012986	0	0.0154138
LOC109498606	0	0.268288	0.234599	0	0.0790906	0	0.0439835	0	0.110662	0.112307	0	2.37651	0.101597	0.0635888	0.0152941	0.773366	0.0373752	0.0317204	0	0.339348	0.670317	7.67159	0	11.4151	0.147726	0.0376163	0	0	0.0551086	1.30465	0	0.111634	0.0811592	1.45073	4.59121	0	0.0070878	0	0.519279	1.11568	0	0.0297925	0	0.336982
LOC111556749	0	0	1.25394	0	0	0	0	0	0	0	0	0	0	0	0	0	0	0	0	0	0	0	0	0	0	0.117285	0	0	0	2.9176	0	0	0	0	17.6689	0	0	0	0.380958	2.72551	0	0	0	0
LOC111560078	0	0.295712	1.69554	0.726728	0.20922	0.0334322	0.269061	0.0163266	0	0.18568	0	0.628665	0.0671894	0.0177066	0.00337148	1.07973	0.065913	0.0104888	0.292341	0.257669	0.0759945	0.0048181	0	0	5.22673	0.124384	0	0.00831318	0.07289	0.595039	0	0.0369136	0	0.00752481	0.954269	0.740436	0	2.62128	1.85848	0.795834	0	0.0336104	0	1.22107
LOC111559858	0	0.365571	1.76045	1.40887	0.517293	0.0206651	0.112373	0	0.0180947	0.229545	0.388322	1.1172	0.221499	0.00957671	0.0666873	0.245885	0.0509277	0.0956296	0.459968	0.190097	0.313158	0.369292	0	0.00542591	0.996398	0.188367	0.129057	0.00428212	0.112637	0.500216	0.200827	0.0228171	0.0331764	0.0395355	0.857967	0.404869	0.0115895	0.441891	0.39957	0.59771	0.302208	0.0752209	0.0451664	0.599796
KCTD12	0.576462	459.889	128.507	392.897	164.497	22.6135	180.84	30.046	42.244	325.304	26.5515	258.767	83.0166	3.72584	19.0367	180.839	56.6844	5.25763	57.2656	187.543	49.8486	11.11	6.89482	2.56138	158.465	40.6917	32.8905	72.9965	76.074	87.0948	60.1777	38.4381	44.7151	34.3506	44.8584	479.304	129.854	148.258	64.5822	46.3544	15.6026	82.0796	38.6248	77.4523
LOC123384532	0	1.93276	2.46267	1.0463	1.63043	0.0672344	0.343671	0.0841367	0.103025	1.19493	0.544575	1.7779	0.731912	0.0840154	0.2318	0.399996	0.0517795	0.319043	1.22928	0.390731	0.542865	0.0218014	0.293948	0.0176533	1.32619	0.393978	0.314917	0.185992	0.60467	1.2565	0.443374	0.222707	0.242865	0.122955	3.53288	1.25998	0.11312	0.119808	1.46251	2.39402	1.22905	0.0705063	1.1756	1.55929
ACOD1	0	0.190481	0.588919	0.354636	0.16846	0.0538381	0.468417	0	0	0.0797366	0.255827	0.33746	0.120222	0.496621	1.35914	0.366054	0.371504	0.0675635	0.128393	0.290012	0.336542	0.44937	0	0	0.471978	0.267072	0.201736	4.71603	0.146724	1.30639	0.0373719	0.217963	0.172866	7.67454	1.41099	0.0305737	0.397549	0.0852771	0.195185	0.647682	0.577376	1.27474	0.235341	0.401249
CLN5	0.446681	10.7407	5.79802	9.23901	13.7635	8.81247	10.8401	11.3774	16.2105	10.885	8.05895	6.62074	28.107	7.45673	4.11211	16.2678	7.09439	2.24682	3.08509	33.1511	15.266	6.14447	38.0302	0.913115	6.17991	7.01926	4.90043	8.30777	7.61853	8.47187	12.7585	13.3172	14.1308	8.60235	13.3489	9.4114	9.40493	6.28891	9.41845	9.83626	11.6304	16.3789	13.638	9.82381
FBXL3	0.419509	29.6738	48.7709	120.475	60.3395	12.9965	19.681	20.0636	23.2703	26.8404	31.1547	71.4804	88.3821	15.527	10.7073	47.4859	46.4022	23.0639	62.8397	60.9936	35.3557	33.2843	26.5525	2.57735	52.4662	22.3286	15.1674	20.3392	67.9089	48.2272	60.1109	57.9071	59.5816	26.7792	93.5072	43.6853	26.0741	42.433	67.0849	32.6621	70.7705	56.4573	42.8467	39.6986
LOC123384556	0.0156291	1.77075	6.13054	6.53301	4.23321	0.51613	0.92193	0.88218	1.52013	2.14556	2.03196	3.61195	3.50736	0.624371	1.51377	3.03072	1.74028	4.15369	2.44309	3.85835	2.46271	1.5795	1.36605	0.0585187	2.07954	2.03663	1.16234	0.834208	3.95981	5.80127	3.39274	2.93573	3.0759	1.35354	13.058	2.33148	0.912228	2.22962	3.35017	3.97128	4.24284	1.72174	2.18777	2.7601
LOC123384552	0	0.353263	0.257421	0.153464	0.590134	0.0221883	0.212353	0.054178	0.0437138	1.23232	0.258792	0	0	0.0286443	0.0290885	0.603447	0.0533143	0.0835346	0.0529146	0.07723	0.111379	0	0.061038	0	0.129677	0.210505	0.0554276	0.104369	0.0725633	3.15142	0.0616082	0.293986	0.0712433	0.0661712	4.42178	0.264606	0.0808838	0.105436	2.5339	2.24144	0.324482	0.0299984	0.145486	1.08926
MYCBP2	0.00846874	2.55703	9.89115	5.86993	1.84443	1.51043	1.26895	2.59156	2.42662	2.42403	1.04584	7.90534	2.00542	0.486123	1.04824	2.36213	1.36507	0.76034	3.75584	1.9947	1.54753	0.164374	1.23403	0.0298545	6.32193	1.99509	1.47489	0.662486	2.78627	4.92896	3.46734	3.99855	3.65983	0.958574	7.30164	3.77267	1.02393	6.19942	1.94879	3.24572	4.18305	1.57725	1.72726	2.02928
SCEL	0.000785987	0.0235383	0.226307	0.141897	0.227552	3.99863	0.0433129	0.0219584	0.0307339	0.0244633	0.0505415	0.260989	1.602	0.182618	0.0111973	3.66008	0.806834	0.0430405	0.0408501	0.433587	0.0938649	0.172119	0.106744	0.0036141	0.203797	0.0382377	0.00114616	0.00136907	0.0525177	0.366829	6.88963	21.5277	21.7475	0.102031	0.397652	0.322829	0.0445159	0.226747	0.174104	0.181798	0.171772	5.91041	0.357002	0.111889
LOC109498704	0.0293552	0	0.272651	0.10159	0	0.411268	0.0894557	0	0.090028	0	0	1.45004	0.206633	0.0544546	0.228109	0	0.101354	0.193543	1.63465	0.127811	0.019476	0	0	0	1.20181	0.0382529	0	0	0.672495	1.02479	0.142741	0.340571	0	0	4.69559	0	0	1.95429	0	0.888935	0	0.128315	0	0.0856713
SLAIN1	0.0244285	6.44654	32.822	34.7189	0.389415	3.16576	2.09961	0.00759703	0.0102162	10.9987	0.171364	33.0008	8.31631	0.232242	0.0384357	2.18154	2.71194	0.109814	17.0843	49.9122	5.93337	2.27053	0.0794761	0.460538	26.3324	6.57494	4.94509	11.0368	13.5074	7.41766	1.45782	5.69831	2.72852	1.19048	13.5875	106.932	3.86494	17.6953	9.86979	10.1648	12.7059	0.857745	3.83361	9.70558
EDNRB	0.0121923	89.2357	28.6997	95.073	18.9908	20.5084	271.775	10.766	19.0324	79.2628	20.4348	36.1101	183.323	9.08918	11.7954	110.605	33.8642	4.88676	10.8799	401.762	5.73112	4.45567	19.2196	0.529786	12.9156	0.115186	0.026669	0.0336254	314.19	3.96748	50.126	19.367	15.5797	24.93	2.11646	133.426	12.7948	12.0231	2.02553	1.22664	4.43394	21.7361	19.4835	1.86214
LOC109492603	0	0	0	0	0.33674	0.0538092	0.713953	0	0	0	0.976271	0	0.216283	0.178118	0.0325584	0.548787	3.4843	0.0337636	0	0.254182	0.0815422	0.0310189	0.0211464	0.0282567	0	0.120118	0.0672093	0	0.117317	0.0766173	1.26996	0.118825	0	0.363336	0.111702	0	0.271596	0	0.130053	0.0734563	0	0.479403	0	0
LOC123383838	0	0.154341	0	0	0	0	0.0759089	0	0	0.193825	0	0	0	0	0	0	0	0	0	0.0216912	0	0	0	0	0	0.0973801	0	0	0	0.248456	0	0	0	0	2.89782	0	0.0489299	0	0.21087	0.704692	1.02072	0	0	0.533116
LOC109498710	0	0.257374	0.00831487	0.000619623	0.00196224	0	0.0672471	0.000153124	0.000274553	0.208975	0.00121905	0.00884419	0.00504125	0.00265707	0.000126482	0	0.00266593	0.000590237	0.00398809	0.0483325	0.0202536	0.0142794	0.0016019	0	0.00366509	0.0116657	0.00313311	0.000155936	0.092289	0.989358	0	0.00138482	0.00201356	0.00112918	4.77242	0.0555553	0.00879241	0	1.5657	0.970834	0	0.000608712	0	0.566513
POU4F1	0	33.7374	0.149404	0.0445343	0.105774	1.20569	12.5108	0.0165083	0	35.5967	0	0	0.301942	0.4088	0.00681799	0.095767	0.0416541	0.00707037	0.394125	4.67564	1.52613	0.148587	0.0619951	0	0.0329277	0.224287	0.140742	0.357709	20.4029	3.1888	0.500594	1.11973	1.32058	0.055796	11.333	11.4221	0.0568745	0.133861	3.1796	1.94395	0.428441	0.0753908	0.0246279	1.1392
OBI1	0.0636029	16.8841	10.6534	16.5083	5.79788	2.90529	7.94867	7.98243	6.13222	16.7338	2.86893	10.538	14.6997	6.75741	1.25455	6.9106	4.54041	1.76474	9.07574	10.7412	9.47171	12.3315	11.0983	0.190097	10.0766	3.7875	2.98245	9.61789	8.61089	12.2996	6.19835	8.27067	8.65046	5.25742	26.4015	6.24628	5.42684	7.16743	18.3568	13.5337	25.3565	7.84012	7.81059	8.46381
LOC109498727	0.00311881	0.386484	0.633664	0.334591	0.555431	0.0873894	0.29938	0.0293401	0.0813018	0.679495	0.0920169	0.821641	0.175628	0.0875052	0.0721548	0.334223	0.10499	0.0891054	0.138938	0.160234	0.324866	0.4038	0.0364894	0	0.383055	0.184918	0.129618	0.0891837	0.202437	0.929345	0.0303308	0.108551	0.0175372	0.0762185	3.1605	0.260541	0.0918935	0.778617	1.06927	0.966186	0.319496	0.0696783	0.119376	0.406558
LOC123384570	0	0.610363	0.0924654	0	0.294437	0	0.154644	0	0.0183098	0.603913	0	0.196605	0.0280166	0.0166124	0.00069589	0	0.00257666	0.00656045	0	0.0467895	0.140616	0.0341438	0	0	0	0.0466791	0	0	0	0.513607	0	0	0	0.0188261	2.24639	0.284997	0	0	0.505401	0.6773	0	0.00869888	0	0.103555
LOC123384573	0	0.2421	0.113411	0	0.0356853	0	0.00992256	0	0	0.405378	0	0	0	0.00302009	0	0.0387709	0	0	0	0.00283541	0.0216031	0	0	0	0	0.059403	0	0	0.0124324	4.79853	0	0	0	0	11.1389	0.0777176	0.0127919	0	3.90033	4.15166	0	0.00474431	0.398821	2.9522
RBM26	0.00399193	4.68152	3.98705	3.24897	3.55229	0.643163	2.34941	1.14466	0.610603	7.40521	1.56174	2.82009	2.91131	1.22531	0.642774	2.22666	1.11426	0.981339	1.91304	2.59823	2.4258	0.628318	1.55035	0.0741216	2.81772	1.21415	0.682747	1.64604	4.14359	4.53209	2.03215	1.88323	1.94806	1.1452	8.29256	1.94218	0.959439	2.51482	4.66284	2.92146	4.40001	1.48476	1.71131	2.2189
NDFIP2	2.4829	18.2465	57.2719	48.542	17.4018	13.0384	15.6931	13.5929	10.3883	18.7547	13.2854	73.0433	34.9851	18.6882	10.3622	22.2213	22.2852	10.2977	101.996	23.0477	9.10226	39.0262	33.763	1.04932	100.687	14.3378	11.6945	25.5329	30.8405	24.3547	19.897	36.3433	39.7918	35.6495	35.9196	40.2181	14.3074	84.5629	36.6542	20.4024	35.2108	26.359	16.8113	24.4779
LOC109498753	0	0.258888	3.46038	0.192798	0.152639	0	0.254655	0.0238225	0.042714	0.433488	0.442529	0	0.0653584	0.0193771	1.27167	1.16086	0.270493	0.550963	0.620453	0.0606404	0.41582	0	0	0	0	1.09803	0.243719	0.0808664	0.319067	5.60881	0.135448	0.484754	0.391578	0.181164	18.7594	0	0.109432	0	20.2202	7.44457	0	0.0811726	0.426476	2.96723
LOC109498754	0	0	0.544606	0.430814	0	0	0.0219918	0	0.0110662	0	0	0	0.0169329	0.021754	0.823968	0	0.123805	0	0	0.0188527	2.80097	3.11727	0.00993336	0	0.0738631	0.0822857	0.0947132	0.00628519	0	2.38886	0	0	0.101449	0.0327126	6.81467	0	0.0567024	0	2.2833	3.22412	0.0739289	0.01402	0	0.712578
LOC123384585	0	0	0.0239491	0	0	0	0	0	0.0158157	0	0	0	0	0.00478318	0.569222	0	0.0222568	0.0113336	0	0	3.82007	4.3133	0	0	0	0.0403206	0	0.00149712	0	1.28593	0	0.0199433	0	0.0162617	4.23699	0	0	0	0.25102	1.06849	0	0.00250465	0	0.0978274
LOC109498764	0	1.10285	0.185985	0.0307991	0	0	0	0	0	0	14.6638	1.02576	0	0	0.295486	0	2.02034	0.0391179	5.25316	0.0116246	0.14171	0	0	0	0	0.185555	0.0778675	0	0	0.488221	0.173101	0	0.200173	0	1.55298	0	0	3.55491	0.0753387	0.460987	0	0	0	0.0346308
LOC109498761	0	0.154543	4.17478	3.24411	0	0.0291203	0.012668	0	0	0.258771	6.9344	8.65864	0	0.00385572	0.321562	0	0.685354	0.0182721	9.16689	0.218101	0.0124112	0.01259	0	0	6.63745	0.0866732	0.0363721	0	0.111106	0.456098	0.0404279	0.128611	0	0	1.52637	2.25728	0	12.2808	0.0703818	0.36026	0.0425856	0	0.0636462	0
LOC109498776	0.00621527	12.2269	8.17564	12.9378	5.33006	2.66671	10.3934	3.72081	3.0927	9.64811	8.02616	7.87996	11.3312	9.98453	1.07789	3.29326	7.10437	1.52985	13.8786	19.0212	5.91735	0.803138	16.3186	0.185762	11.1642	0.133636	0.0271902	2.64066	9.05331	2.00701	4.3671	4.4106	4.68312	7.4402	4.15748	7.12065	3.57101	11.9219	1.56528	2.11737	4.26591	6.17688	4.23455	2.48805
SPRY2	0.00497935	87.4505	56.1858	108.579	44.7072	18.7395	77.7319	30.184	11.541	59.8412	76.608	73.4196	49.9579	46.0617	6.20053	24.9313	24.8318	8.47552	121.087	62.1303	29.0585	2.02455	115.997	0.821962	99.9149	0.418516	0.239617	11.6316	87.103	8.11407	44.9988	39.0615	37.4068	38.1057	8.41741	52.709	15.7228	113.848	7.82972	8.77528	15.9149	19.905	26.8732	8.59806
LOC111560110	0.114316	0.354153	0.675147	0.989036	0.217886	0.0348169	0.0757309	0.0892646	0.373455	0.309392	0.327125	0.327351	0.139944	0.0322699	0.0658334	0.650996	0.0793684	0.16658	0.29061	0.144991	0.13685	0.0188162	0.0239446	0	0.45784	0.129536	0.0217437	0.0151506	0.123352	0.601094	0.0725048	0.076885	0.027948	0.24293	1.52683	0.118631	0.649242	0.248168	0.589051	0.760471	0	0.0494863	0.247315	0.207911
LOC123384596	0.0220333	0	0.869744	0.686257	0.241473	0	0.0335717	0	0	0.171443	0	0	0.14217	0.048536	0.035021	0.131176	0.166412	0.145269	0.613467	0.100729	0.00365457	0.19741	0	0	0	0.0861353	0.0963902	0	0.0420633	1.16751	0	0	0	0.00868481	2.84355	0	0.0432798	0	1.0958	0.737447	0	0.0160517	0	0.33759
LOC123384595	0.0652958	0.112382	0.555928	0.0251077	0.119267	0.025411	0.0165816	0.0124094	0.0111251	0.0564523	0.0164656	0	0.0723478	0.0370105	0.0128129	0.0647902	0.0313118	0.0558062	0.202001	0.0458031	0.0613717	0.0521853	0	0	0.0742563	0.0803602	0	0.00105311	0.152355	0.384434	0	0	0	0.0142986	0.692348	0.129874	0.0356277	0.301875	0.353147	0.360624	0	0.00528548	0	0.142921
LOC111556774	0	0	0	0	0	0	0	0	0	0	0	0	0	0	0	0	0	0	0	0	0	0	0	0	0	0	0	0	0	1.12215	0	0	0	0	0.327201	0	0	0	0	0	0	0	0	0
LOC123384597	0	0	0.163772	0	0.103063	0	0.0286576	0	0	0	0.0426856	0	0.0551633	0.129746	0	0	0.00811731	0	0.261835	0.0307088	3.59795	9.32046	0	0	0.192503	0.049018	0	0	0.107718	1.9815	0	0	0	0	4.70934	0	0	0	0.427897	1.44542	0	0.00456738	0	0.329343
LOC109498777	0	0	7.16578	0	0.106692	0	0	0	0	0	0	7.65401	0	0	0	0	0.16386	0.0213951	3.36105	0.0508637	0.0258356	0	0	0	8.07083	0.0126859	0	0	0.260191	1.43224	0	0	0	0.0306981	1.38026	0	0.0382452	2.83546	0	0.512021	0	0.0141845	0	0.501935
LOC109492609	0	0.463629	0	0	0.205015	0	0	0.0639938	0	0	0.169822	0	7.50565	0.0347015	0.858967	0	0.0484412	0.205561	0	0.0162897	0.0868784	0	0	0	0	0.0975074	0.0818372	0	0	0.279879	0.181925	0.144687	0	0.0589886	1.49614	0.446495	0.367454	0	0.514667	0.406224	0.766541	0.499702	0	0.163783
LOC123383856	0	0	0	0	0	0	0	0	0	0	0	0	0.391579	0	0.0196489	0	0	0	0	0	0.212221	0.322918	0	0	0	0	0.121682	0	0	1.52587	0	0	0	0	4.70197	0	0	0	0.647517	1.27451	0	0.0202636	0	0.689991
LOC123384602	0	0	0.00525448	0	0	0	0.00344795	0.0019353	0	0.105647	0.0102715	0	0.0053096	0.088153	0.00239786	0	0.000976638	0	0	0	0.822367	1.41838	0	0	0.0463221	0.0250649	0.0197993	0	0.00864013	2.35583	0	0	0	0.00178393	9.12947	0	0	0	0.431017	1.74402	0	0	0	0.397901
TRNAP-UGG	0	0	0.260622	0	0	0	0	0	0	0	0	0	0	0.0520522	0.396446	0	0	0.123336	0	0	0	0	0	0	0	0.146261	0.982046	0	0	1.11951	0	0	0	0.176966	2.85627	0	0	0	0	1.29694	0	0	0	0
LOC123385997	0	0	0	0	0	0	0	0	0	0	0	0	0	0.0175573	0	0	0.0816965	0	0	0	0	0	0	0	0	0	0	0	0	0.28321	0	0	0	0	7.08806	0	0	0	0	1.05594	0	0	0	0.626103
LOC109498786	0	0	0.0749675	0.0279328	0	0	0.00614913	0	0	0	0.0366367	0	0	0	0.00142546	0	0.00174175	0.00886937	0	0.000878568	0.0160653	0.0702798	0	0	0.0206529	0.136733	0.0706209	0	0	3.10956	0	0	0	0	4.84158	0	0	0	3.43346	2.3445	0	0	0	0.969721
LOC101091991	0	0	0.0298556	0	0	0	0	0	0	0	0	0	0	0.0119257	0	0	0	0	0	0	0.418	1.03518	0	0	0	0.23457	0	0	0	1.26643	0	0	0	0.0202724	10.6107	0	0	0	1.25172	2.09792	0	0.00624475	0	1.07157
LOC111556984	0	0	0	0	0	0	0	0	0	0	0	0	0	0	0	0	0	0	0	0	0.0586084	0	0	0	0	0	0	0	0	0.220275	0	0	0	0	13.488	0	0	0	0	0.211187	0	0	0	0
LOC111556727	0	0	0	0	0	0	0	0	0	0	0	0	0	0	0	0	0	0	0.993015	0	0	0	0	0	0	0	0	0	0	0.444667	0	0	0	0	1.29657	0	0	0	0	0.213161	0	0	0	0.173478
LOC123384610	0	0.428612	9.42334	2.85279	0	0	0.0351337	0	0	0.358839	0.13083	0.806794	0	0.0534675	0	0	0.00497584	0.050676	0.866713	0.100396	0.114738	0.0567408	0	0	0.94402	0.0450714	0	0	0.792365	0.69716	0	0	0.0648293	0	4.37995	0.550363	0	1.15132	0.634393	0.64428	0	0.00559952	0	0.47482
LOC111560115	0	0.459884	18.4873	4.22834	0.125144	0	0.200084	0	0	0.977358	2.17689	2.51472	0.241134	0.124446	0	0	0.0147846	0.156846	5.48431	1.56982	0.0151519	0.0115277	0	0	2.16214	0.0743997	0.149863	0	2.50693	0.839971	0	0	0	0.00450092	2.9266	1.73748	0	1.948	0.628318	0.666547	0	0.00831886	0	0.992368
SLITRK1	0	13.369	61.016	59.3297	0.654106	0.0126694	3.52735	0	0	8.26082	1.6583	102.226	0.97604	2.95326	0.00766588	0	4.85202	0.280225	59.446	6.63084	0.199191	0	0.00248946	0.0199591	109.939	0.0400658	0	0.00420046	20.8479	0.622365	0.228657	0.0769378	0.122039	0.349319	2.35386	39.8983	0.0710527	95.0459	0.474627	0.636323	0	0.217406	0.0276906	0.304384
LOC123384615	0	0	0.00897605	0	0	0.128625	0	0	0	0	0.0175464	0	0	0.0452662	0.00136539	0	0	0	0	0.0138855	0.0872002	0.119514	0	0	0	0.0201494	0	0	0.0147596	1.45553	0.150376	1.0203	0.999889	0.00152371	5.61075	0.046133	0.0151865	0	2.25796	1.70122	0	0.373852	0.0591848	1.13381
LOC111560117	0	0	0	0	0	0	0	0	0	0	0	0	0	0.0112486	0	0	0	0	0	0	0.00715222	0	0	0	0	0.0140477	0	0	0	2.57385	0.0786288	0.0416895	0.363703	0	9.39585	0	0	0	0.878356	2.10471	0	0.0333777	0	0.390643
LOC111556999	0	0	0	0	0	0	0	0	0	0	0	0	0	0	0	0	0	0	0	0	0	0	0	0	0	0	0	0	0	0.321482	0	0	0	0	0.70304	0	0	0	0	0.333904	0	0	0	0
LOC123384617	0	0	0	0	0	0.0552323	0	0	0	0	0.0715778	0	0.0740009	0.0438787	0	0	0	0.0173283	0	0.0497778	0.0523117	0	0	0	0	0	0	0	0.0602096	1.1305	0.690114	1.53984	1.33007	0.0124315	2.63708	0	0.0619509	0	1.95233	1.098	0	0.99948	0	0.571437
LOC111560056	0	0	0	0	0	0	0	0	0.0570353	0	0	0	0	0	0.0032844	0	0	0	0	0.0161944	0	0	0.0255982	0	0	0.193874	0	0	0.142015	1.79327	0	0.215761	0	0	8.23678	0	0	0	5.11657	3.98847	0	0.0541942	0	2.00818
SLITRK6	0	15.6672	8.22874	17.7473	1.74768	1.95488	34.3921	0.013503	0.0157372	10.2092	4.18892	2.17076	5.31986	0.0885986	0.0563259	1.1468	0.496077	0.0902188	0.0703368	13.2955	3.95208	0.781429	4.26121	0.201828	1.51904	0.0154309	0.00690723	0	4.88002	2.89014	4.31089	10.5022	10.4407	1.79671	8.82532	23.0162	1.06068	1.45187	4.03815	2.68942	0.0485233	9.48547	0.374689	1.49929
LOC123384622	0	0	0.0246829	0.0245249	0.00650453	0	0	0.0121214	0.0190171	0	0	0	0.00623545	0.013146	0.0019837	0	0.00152925	0	0	0	0.00999119	0.0187799	0.0012193	0	0.0362663	0.0392474	0	0.000514331	0.013529	1.28632	0	0.00685147	0	0	5.05327	0	0	0	0.487428	0.909398	0	0.0126919	0	0.302905
LOC123384629	0	0.749618	0.0267547	0	0	0	0.333568	0.0394165	0	0	0.444552	0	0.0337942	0.537024	0.0040698	0	0.0149185	0	0	0.0100335	0.0688012	0.0668846	0.0872288	0	0	0.217713	0	0	0.0439937	3.27539	0	0	0.0647901	0.0181668	19.5303	0	0.0452661	0	1.42652	3.29406	0.118036	0.0111923	0	0.465174
LOC123386020	0	0	0	0	0	0	0.102011	0	0	0	0	0	0	0	0	0	0	0	0	0.102025	0	0	0	0	0	0.0436217	0.439336	0	0	0	0	0	0	0	0.243392	0	0	0	0	0.173396	0	0	0	0.0976954
LOC111560120	0	0.246817	3.81548	0.723746	0	0	0.561433	0	0	0.309957	0	17.7092	0.233667	0.286342	0	0	0.481378	0	3.6046	0.364222	0.0132144	0	0	0	4.68869	0.0648862	0.0435668	0	0.30419	0.496653	0	0	0	0.0157016	1.37575	1.90157	0.078247	4.39231	1.55962	1.51975	0	0.019347	0	0.8041
SLITRK5	0	10.4451	11.242	13.5192	0.880086	0.0944709	6.72685	0.00419407	0.0162933	9.13586	0.168804	31.4444	5.10608	0.188387	0.0060626	0.0340626	0.770764	0.0543378	21.5395	1.82311	0.533057	0.00660108	5.18694	0.000751656	22.7125	0.0223668	0.0160905	0.000711846	3.57012	0.741867	0.119231	0.139078	0.128687	0.0837641	1.42552	9.90298	0.0441511	22.6769	0.487796	2.18499	0.25119	0.630385	0.118882	2.4931
LOC101093984	0	0	0.0270157	0.0201321	0	0	0.0177275	0	0.00446023	0	0	0	0	0.0134891	0	0	0.00125534	0	0	0	0.0598235	0.0323004	0	0	0	0.0189515	0.0254494	0	0	5.24751	0	0	0	0.004586	7.98351	0	0.0114269	0.0484104	5.18312	3.91706	0	0	0	5.92847
LOC123384639	0	0	0.00274458	0	0	0	0	0	0	0	0	0	0	0	0.15656	0	0.007907	0	0.00658196	0	2.64865	2.6173	0	0.0146745	0	0.0423571	0.0129273	0	0	0.470842	0	0	0	0.0186361	5.73759	0	0	0	0.143836	0.409737	0	0.000717587	0	0.121885
LOC111556882	0	0	0	0	0	0	0	0	0	0	0	0	0	0	0	0	0	0	0	0	0	0	0	0	0	0.117285	0	0	0	0	0	0	0	0.141907	1.96321	0	0	0	0	0	0	0	0	0
LOC111560123	0	0	0.0909769	0	0	0	0	0	0	0	0	0	0	0	0	0	0	0	0	0	0	0	0	0	0	0	0	0	0	24.6934	0	0	0	0.0308873	35.1463	0	0.346327	0	64.2208	14.1946	0	0	0	21.5923
LOC123384654	0	0.146464	0	0	0	0	0.0360172	0	0	0	0	0	0.0221856	0	0	0	0.0102019	0	0	0	0	0	0	0	0	0.0246426	0	0	0	2.95897	0	0.0365661	0	0	7.16697	0	0	0	0.620331	3.22494	0	0	0	0.871537
LOC123384657	0	0	0	0	0	0	0	0	0	0	0	0	0	0	0	0	0	0	0	0	0	0	0	0	0	0.074296	0.0831414	0	0	4.99962	0	0	0	0	4.6636	0	0	0	5.42979	2.70336	0	0	0	1.71016
LOC123384661	0	0	0	0	0	0	0	0	0	0	0	0	0.0204993	0.230946	0	0	0	0	0	0	3.35034	7.38671	0	0	0	0.0569239	0.0382207	0	0	1.37248	0	0	0	0	4.22425	0	0	0	1.4422	1.68137	0	0.00848646	0	0.475952
LOC109492621	0	0.26768	0	0	0.0789116	0	0.0438839	0	0	0	0	0	0.0675781	0.29385	0	0	0.0217529	0	0	0.00626999	0.0238857	0.00726897	0	0.0132433	0	0.131359	0	0	0.0549838	0.233408	0	0	0	0.0340576	1.12557	0	0	0	0.396196	0.407392	0	0.00174853	0	0.105069
LOC123386050	0	7.42882	0.798973	0.769204	1.92064	0.351821	6.04713	0.48619	0.317891	12.4722	1.31932	0.211139	5.62139	1.90497	0.751108	3.28276	3.33164	0.702194	0.380834	5.79439	5.54559	0.258908	1.36791	0.465808	0.262492	3.36427	2.21587	4.88664	2.13795	4.14614	3.2112	3.76886	3.64131	5.08985	13.9464	1.04572	2.96383	0.604696	4.8125	5.3231	27.9584	7.41491	6.33158	2.60926
GPC5	0.00225516	1.49162	3.19948	0.478021	0.030894	0.049367	0.50597	0	0.00518717	1.7723	0.0921265	1.63381	3.3693	0.0277148	0.0129439	0.0503481	0.606603	0.0997435	1.3123	0.24719	1.16629	3.38923	0.00698423	0.101103	3.87772	0.0536314	0.0197315	0.00130938	0.176516	0.118091	0.0274146	0.0261637	0.00634041	0.0342229	0.680467	2.92008	0.00885954	4.35859	0.152725	0.153205	0.0115511	0.0302573	0.422961	0.166184
LOC111556710	0	0	4.08493	0	0	0	0.309288	0	0	2.10595	0	0	0	0	0	0	0	0	0	0	0	0.0683077	0	0	0	0.176343	0	0	0.516692	0.843605	0	0	0	0	2.21383	0	0	0	0	0.431361	0	0	0	0
LOC111556930	0	1.08464	1.21942	0	0	0	0.533451	0	0	0	0	0	0	0	0	0	0	0	0	0.0762178	0	0	0	0	1.79169	0.456227	0	0	0	0.436508	0	0	0.492167	0	0.636391	0	0	0	0	0.0697498	0	0.0212551	0	0.170295
LOC123384678	0	1.35172	0.229831	0.447398	1.21759	0.141501	1.03876	1.29221	0.827035	1.3753	0.0366755	0.266081	0.549797	0.0112414	0.0114158	0.0721568	0.0017436	0.0133181	0.42744	0.532097	1.55998	0.850878	0.2697	0	0.124049	0.0631744	0.0176739	0	0.81754	0.15111	0.275026	0.234354	0.22717	0.0652896	0.308427	0.452002	0.0476142	0.571536	0.0854998	0.196386	0	0.0716183	4.51534	0.0471618
GPC6	0	56.2783	4.70649	8.29149	66.066	3.39345	43.3954	53.9748	24.8727	48.5319	2.45188	5.12808	16.0919	0.531373	0.837367	3.5885	2.55823	0.641788	4.0854	18.1722	26.7958	14.721	17.3168	0.0416724	8.0759	0.0449898	0.0409063	0.000417623	13.4239	0.373059	5.35469	3.90259	4.55815	3.13169	1.08255	6.42287	5.40983	8.58934	0.4932	0.765776	0.76631	2.67243	18.4127	0.834764
LOC109498840	0	2.17836	5.78869	0.442433	3.41521	0	1.04702	0.191338	0.245051	3.23301	0.217611	0	0.0374962	0.0148222	0.18627	0.475707	0.00689699	0.210726	0	0.0904528	0.0742177	0.0322659	0	0	0.654252	0.0416489	0	0	0.549148	21.08	0.155414	0.432607	0	0	12.7811	0	0.219734	1.19688	20.2246	13.7696	0	0	0.48934	9.20333
LOC123380683	0	1.02745	3.2087	0.420837	3.21064	0	0.926431	0.0378179	0.135616	1.72039	0	1.00114	0	0.00512681	0.175713	0.241546	0.0190846	0.145774	0.12312	0.151619	0.271378	0.14062	0	0	0.339445	0.110492	0.0483626	0	0.379886	2.67393	0.430044	0.0855045	0.186487	0.008715	0.884164	0	0.130291	0	2.62036	1.5527	0	0	0	1.65263
DCT	0	12.4586	0.980867	0.804035	2.03699	10.0017	0.524565	0	0	5.07827	0	2.33006	4515.82	0.0411393	0.0059682	0	0.0255236	0.111404	1.83478	10090.2	0.0532497	0	0	0	0.994413	0.0660555	0.0184799	0	27786.9	0.105334	8.42165	15.5765	7.80287	0.00666021	0.0921408	3.17598	0.0290416	0.316377	0.089399	0.0950973	0.56256	6.2508	0	0.217798
TRNAF-GAA	0.261382	0	0.910393	0	1.4323	0	0	0	2.00405	2.03383	0	0	3.37312	0.242435	0.0923231	0	0.112808	0	0	1.82087	0.52025	0.131937	0	0	0	1.02182	2.8587	0.113822	2.99398	10.4284	0	0	0	0.309084	12.353	0	0	0	4.97855	3.59307	0	0.126948	0	1.77993
TGDS	0.0906455	7.47415	3.81695	4.1957	8.64469	2.75359	5.54981	4.59468	4.05901	9.38616	1.96228	2.98504	20.2523	4.41353	1.38351	8.10531	3.09998	0.733641	3.1936	23.3112	10.9645	5.33659	6.44238	0.583524	4.47824	4.33412	2.1734	3.94424	19.1918	3.48608	5.17904	6.69412	6.14584	3.44926	6.36569	5.61688	4.53695	1.92934	3.59324	3.92083	15.4824	5.70586	6.88573	2.77601
GPR180	0.0334603	9.97777	11.8039	9.58475	8.7576	1.19113	5.96729	4.41103	2.15824	10.7977	2.13182	8.9803	11.85	3.48197	0.6324	4.25579	2.62628	0.626395	7.05663	11.5429	4.21449	3.07637	5.90525	0.278619	6.99258	1.43174	0.864973	2.92686	14.9214	5.63416	3.46113	3.76198	3.41746	1.98314	10.2654	13.1847	1.52005	6.38405	5.68308	5.38668	9.58518	3.62442	3.19483	4.3671
SOX21	0	4.74752	17.372	12.9727	1.61488	49.1599	1.58058	0	0.0241014	6.97098	0.035671	17.2259	0.479421	0.590411	0.00277578	0.046787	3.30859	0.0431779	9.56186	16.7592	0.776875	0.234041	0.102762	0	11.9043	0.0512034	0	0.0136887	4.35081	0.627075	23.6349	59.476	40.7429	2.30154	2.57125	15.1699	0.0926202	13.2104	0.598738	0.790647	0	29.9972	0	0.279043
LOC109498853	0	0.31781	1.5781	0.266263	1.96749	0	0	0	0	0.798224	0	0	0	0	0	0	0	0	0	0.033499	0.0170154	0	0	0.0235852	0	0.0501298	0.112196	0	0.195843	7.83397	0.374121	0.247952	0.432631	0	26.3854	0	0.100754	0	45.1579	16.2478	0	0.00934194	0	12.4995
LOC123384686	0	0.202832	0.394315	0.201796	0.622234	0.476546	0.081053	0.00699911	0	0.819878	0.0185737	0.303193	1.13775	0.0113861	0.00939466	0.127899	0.0189848	0.0112413	0.119628	0.589274	0.24332	0.134257	0	0	0.104704	0.0759849	0.0179013	0	0.00781188	0.119892	0.741181	2.50425	2.01907	0.00241938	0.286362	0.524965	0.0040189	0.229853	0.12557	0.273506	0.0209595	0.0645902	0.227106	0.10748
ABCC4	0.00939416	0.731738	0.999513	0.215962	2.10506	1.83826	1.13896	1.97065	1.64837	0.524729	1.21526	0.798254	18.7086	1.70219	0.24329	2.49681	1.41411	2.62864	0.648292	2.02822	7.15765	2.81895	1.96083	0.0314713	0.281582	0.710448	0.449132	0.672549	0.937699	5.7925	1.21704	2.65465	2.48994	1.21824	16.9199	0.372367	0.477137	0.262447	8.14277	6.32739	1.49852	1.8181	9.04579	3.70718
LOC111560130	0	0.140078	0.892415	0	0.68136	0.184894	0.155011	0.0386692	0.0173336	0.175912	0.307853	0.558368	0	0.0314534	0.119779	0	0.078057	1.46572	0	0.0393732	0.0899959	0	0.0311182	0	0	0.0294602	0	0.00328161	0.0863194	2.17518	0	0.349717	0.773548	0.0356448	13.7184	0	0.0444079	0	10.3346	3.58594	0	0	0.778799	2.84447
LOC123384688	0	0.165931	0.497468	0	1.06392	0.492439	0.0816087	0.0687091	0.0615981	0.416757	0.0607784	0	0.0785448	0.0807266	0.0520249	0.279015	0.0751264	1.02997	0	0.0524699	0.115489	0.00337943	0.0184307	0	0	0.226833	0	0.00971816	0.0511253	1.70284	0.813877	1.7865	2.48467	0.0475013	2.84768	0	0.026302	0.222858	4.16568	1.45652	0	0.100801	1.3838	0.853206
LOC123384700	0	0.0200382	0.214019	0.0951326	0.584815	0.135928	0.183555	0.163184	0.0495917	0.125822	0.0880771	0.186375	0.159353	0.207724	0.0125653	0.240675	0.195233	0.0124382	0	0.0823734	1.18548	1.45613	0.0445149	0.100377	0.0662014	0.109572	0.0778147	0.0549241	0.0555663	0.219752	0.149395	0.181349	0.172759	0.0764852	0.629003	0.106137	0.161991	0.134564	0.177953	0.346311	0.298171	0.131351	2.17245	0.100676
CLDN10	0	2.70007	14.9697	1.65325	0.944953	0.261186	2.39494	0.0518172	0.0285873	2.17591	9.60444	9.82277	22.429	18.1073	0.0197545	0.610448	11.0088	0.576162	8.48022	5.91678	4.27959	18.7099	0.0962279	16.2691	10.1368	0.0334035	0	0.00405912	2.34897	1.49049	0.317281	0.522697	0.655181	2.45435	3.59202	7.03606	4.50423	8.0479	5.49402	3.75819	0.19098	15.1118	87.6355	2.24659
DZIP1	0	37.2488	26.6943	9.89293	19.2542	4.01481	20.4995	17.3074	10.8472	43.7005	2.5521	19.5185	35.9158	6.00183	0.20423	15.1195	5.5984	0.625807	32.4252	17.3856	14.9546	1.97225	24.8956	0.11604	22.2915	0.0214196	0.00422995	0.147929	5.38631	47.1592	9.9463	5.69488	6.44277	1.83624	78.5551	26.4707	4.24583	19.3232	105.587	46.1354	4.95257	5.95431	14.2005	34.0907
DNAJC3	3.02029	66.0646	59.3468	74.8917	141.957	36.2931	76.2728	104.457	86.7394	70.3344	68.6039	62.4462	180.027	66.2076	80.8846	122.078	93.1066	24.29	40.3788	120.477	69.9042	150.963	164.754	21.5215	62.0666	32.4694	24.6923	23.0242	84.123	51.3089	80.753	66.6241	65.5823	88.0135	73.985	78.7459	47.2165	57.4365	71.2805	53.0349	181.796	77.4441	71.247	84.283
UGGT2	0	9.23674	12.8116	1.29086	24.3638	0.358636	10.1517	18.183	18.7177	9.7538	1.59062	2.11269	17.3959	6.84902	0.423443	4.2786	0.891106	0.434691	2.38698	13.4954	15.3734	5.49594	14.9877	0.0555631	2.44101	0.0414379	0.00556456	0.0084931	2.13447	12.6267	1.60811	0.804262	1.15153	0.752806	28.6326	2.00943	1.53659	1.29137	14.9509	12.1458	0.335531	2.55928	4.10424	5.58868
HS6ST3	0	6.48342	81.4341	12.7439	0.526832	0.250597	1.51941	0.00382433	0.00685706	3.63606	0.679964	73.8315	27.2838	0.0767304	0.0071076	5.29791	3.6688	0.243233	129.012	20.0246	0.437235	0.130352	0.0061551	0.75256	107.762	0.0786663	0.00978134	0.00129818	26.4216	0.273188	0.10872	0.155639	0.100579	0.796699	1.39806	42.4993	0.153716	57.6516	0.317033	0.329179	0.183237	0.36704	2.32778	0.204457
LOC109498887	0	0.168014	3.70439	0.187683	0.9906	0	0	0	0.0138603	0.210994	2.5232	0.818552	4.42721	0	0	0.107626	0.007802	0.0198647	1.35899	0.623769	1.70162	0.241811	0	0.0498742	2.63661	0.164899	0	0	0.276091	0.405698	0	0.0699104	0.0508254	0.0213767	0.88721	1.2405	0	1.50437	0.344324	0.711293	0	0.0636544	0	0.373704
OXGR1	0	0	0.560069	0.0770516	0	0	0.0113081	0	0	0.288739	0.101061	0	0.174137	0.633292	0	0	0.0512486	0.163105	0.681901	0.135716	0.0147718	0	0	0.00682513	0.835564	0.13056	0.0324675	0	0.08501	0.36087	0	0	0	0.0438801	0.377726	0	0.0145781	0	0.157066	0.427303	0	0.00540677	0	0.162446
LOC111556794	0	0	0	0	0	0	0	0	0	0	0	0	0	0	0	0	0	0	0	0	0	0	0	0	0	0	0	0	0	0	0	0	0	0	0	0	0	0	0	0	0	0	0	0
LOC123384719	0	0	0	0	0	0.0530826	0	0	0.0232399	0	0	0	0	0.0070285	0	0	0	0	0.168789	0.0131974	0.0603308	0.0153001	0.0104304	0	0	0.029624	0.0331509	0.0087996	0.0578662	1.19043	0	0	0	0	3.49864	0	0	0	0.67356	1.1232	0	0	0	0.184294
MBNL2	0.679377	12.1691	31.2969	65.4039	30.8898	9.39312	9.3127	13.8846	8.94241	12.1798	28.607	34.1999	27.5941	9.39618	4.42285	24.8463	12.3121	6.32334	51.5653	27.2258	9.55114	13.027	18.5854	1.32181	40.5057	6.81501	3.98381	2.91222	37.3452	11.8752	28.2434	20.2529	25.9761	5.73066	9.28548	45.8373	5.73224	31.4431	9.59688	6.82414	12.6399	12.7706	15.9911	12.3112
RAP2A	0.308182	38.4219	137.845	73.8341	35.705	12.4287	29.4085	24.6923	26.3595	39.3784	14.618	155.946	55.3717	8.62225	13.8182	63.6405	43.3773	3.62354	238.835	98.998	29.7543	3.4101	32.8297	0.643756	200.003	28.2148	17.7002	15.2671	34.2331	26.1719	16.6018	22.8658	24.4589	13.4629	23.8478	172.531	27.3146	168.935	17.8055	16.779	38.0202	31.1945	23.7605	15.3328
LOC123383925	0.010144	0	0.400424	0	0.111173	0	0.12365	0	0	0	0.0460442	0	0	0.00470435	0.498034	0.301964	0.0842764	0.0111468	0.0564873	0.0220833	0.00673015	0.0332823	0	0	0	0.10575	0.110944	0.00441734	0	0.164416	0	0.0392293	0	0.0399843	0.165949	0.0605297	1.08595	0.464287	0.107341	0.0909418	0.519585	0.0726695	0	0.0641434
LOC123384733	0	0.0241031	1.33233	0.0269248	0.0426332	0	0.00592724	0.00665379	0	0	0.0353147	0	0.00912753	0.148383	0.0054961	0	0.116264	0.00854931	0	0.0423432	0.911065	0.573858	0	0	0.0398153	0.0887108	0.0680725	0.00169399	0.0742646	0.0679012	0.0189158	0	0	0	0.0424261	0	0.213955	0	0	0.0240249	0.0398508	0.011336	0	0.00378433
LOC123383936	0.00712505	0	1.05884	0.147946	0	0	0.0217125	0	0	0	0	0	0	0.04626	0.0050333	0	0.0507385	0	0	0.0186133	0.023636	0	0	0	0.218776	0.13927	0	0.00206847	0	1.44799	0	0	0	0.00561691	3.40617	0	0.188941	0	0.422212	3.7453	0.291961	0.013842	0	2.58712
IPO5	0.37918	238.146	76.5697	90.4875	74.2145	50.9699	140.083	273.785	194.223	243.126	86.4924	72.7575	227.181	164.029	27.4558	62.0883	93.0331	95.0592	64.7771	118.986	97.9672	45.3827	266.632	4.63406	86.5032	28.2826	21.6831	108.642	121.705	386.394	80.2113	78.7316	84.806	61.1313	583.645	63.4169	41.4185	74.7049	687.608	352.49	128.559	74.6037	113.402	285.885
LOC123384742	0	0.293801	1.43685	0.131279	0.181885	0.0332162	0.093924	0.133824	0.0145423	0.221376	0.0860926	0.390377	0.411657	0.612429	0.033497	0	0.03479	0.0208421	0.316857	0.427361	0.30516	0.0203446	0.0979018	0	0.242662	0.111222	0.0829761	0.0550631	0.706086	2.50667	0	0.0641815	0.0533263	0.041119	9.00698	0	0.0558851	0.315678	2.71451	2.34373	0	0.0345448	0.0725985	0.625041
FARP1	0.0155428	40.5439	19.5216	15.5217	20.3781	9.6314	32.4494	34.5405	10.6813	39.3564	2.85263	15.4747	36.238	16.6654	10.3323	22.1512	23.3259	3.38397	14.5645	18.3135	30.0468	4.16906	34.3954	0.398155	20.7686	0.422401	0.248722	0.137326	12.9298	11.6348	7.78354	9.13799	9.52638	13.8466	17.7082	21.9988	3.33868	25.9759	8.24251	11.8047	11.9124	8.56884	28.4684	9.63161
LOC123384760	0	3.7738	10.3637	1.11292	6.94204	0.0682646	4.46936	0.0833423	0.0597734	8.56847	0.88467	1.28366	0	0.668863	6.50208	3.5971	0.357495	2.24878	0.596925	0.521886	0.604523	0.491899	0.0268272	0.0179238	1.1969	0.165085	0	0.00565817	2.79061	3.19545	2.08499	2.14814	2.30147	0.464784	23.6477	0.81409	0.497696	1.62192	6.3934	3.19272	5.39084	0.023665	6.78866	3.34175
LOC109498918	0.162636	0.675587	1.65761	0.397033	1.47259	0.102225	0.523857	0.424491	0.183242	0.869839	4.40011	0.352113	0.494445	0.315271	0.513632	0.700512	0.717478	1.00491	0.153326	0.337671	0.738206	0.0545743	0.788561	0.00286976	0.492237	0.0676936	0.0353336	0.00420988	0.392835	1.54344	0.2767	0.353519	0.328231	0.225744	1.74771	0.322024	0.0977139	0.413967	1.08463	0.985851	0.327197	0.108632	0.944297	0.480178
STK24	1.4476	63.3184	35.4047	86.6953	37.784	94.9292	44.5394	36.0417	9.47375	70.9508	29.1504	75.6667	73.5728	36.6225	8.27636	49.3334	35.536	9.82191	89.7638	37.5276	69.8852	13.6227	49.4583	3.98636	76.5026	45.9473	33.5225	37.472	54.2553	52.89	76.0013	108.895	110.762	58.7559	47.4465	50.4638	29.5148	65.5009	72.2123	52.9388	86.8425	29.9479	80.4218	51.7558
LOC123384763	0.0130751	0.0540089	0.263122	0.0754148	0.382121	0.190815	0	0.029819	0.0133664	0	0.118697	0	0.0306787	0.0404243	0.170876	0.103791	0.0978119	0.0957843	0.266966	0.0246689	0.563862	0.624786	0.0179971	0	0	0.249893	0.0953334	0	0.0332817	0.0760748	0.0423855	0.117984	0.196058	0.0549734	0.142599	0	0	0	0.0553425	0.145872	0	0.00846707	0	0.0635979
LOC123384762	0.00954044	0	0.0886115	0	0.209116	0.51794	0.0436097	0	0.0292591	0	0	0.0785438	0.0447705	0.0265466	0.572865	0	0.189405	0	0	0.0249232	2.54454	3.72735	0	0.0175474	0	0.11189	0.041737	0.0221574	0	0.237897	0.0927819	0.590323	0.482816	1.29362	0.641642	0	0	0.317572	0.726868	0.220479	0	0.00695041	0.511238	0.0928106
SLC15A1	0	0.100532	0.0251167	0.0935845	0.666823	82.5443	0.222498	0	0.00829339	0.0420832	0	0.311682	0.196696	0.067721	0.481399	0.080498	0.683917	0.0237723	0.210819	0.145998	3.94351	2.97841	0.018611	0.0373032	0.387488	0.0986682	0.0473208	0.014131	0	1.16993	21.7885	77.2938	81.9747	993.175	3.53912	0.0968166	0.0531183	0.450074	0.789775	0.829663	0.886476	0.38285	0.16561	0.560336
DOCK9	0.000623137	0.901858	7.67506	5.43009	4.65621	1.81306	1.02914	0.848234	0.633499	0.832153	3.49774	8.08314	3.09884	0.306034	0.221108	5.04326	1.3589	1.12069	3.72334	5.26572	3.01239	0.225865	1.48038	0.0607919	5.50329	0.755274	0.458433	0.518153	3.04561	3.19053	4.30695	3.42426	3.32318	0.890249	5.57762	6.33921	1.20668	5.14302	2.05288	3.68051	3.44524	2.15893	2.32907	2.23868
LOC123384798	0	1.02128	13.5824	4.90971	5.24725	0.969064	0.88499	0.80216	0.741708	1.23674	4.61369	6.67186	2.24681	0.291201	0.27169	5.08181	1.05267	2.73194	2.70986	3.50243	2.13117	0.379352	1.58274	0.0216546	5.22177	1.50097	0.721083	0.3999	2.92194	7.36883	4.43682	4.07501	3.11153	0.733232	18.8183	4.98794	0.759319	5.11107	2.79066	5.12621	2.67351	1.19605	1.08154	2.92252
LOC109498988	0.000911826	0.158191	2.75773	0.416534	1.56727	0.0127747	0.152826	0.00779816	0.0202741	0.227039	0.749128	0.277752	0.00357291	0.0145889	0.066507	0.96629	0.0358112	0.782036	0.162481	0.0587568	0.0178464	0.0119667	0	0	0.298643	0.144961	0.00797801	0.00966197	0.316815	2.18275	0.882329	0.638252	0.620395	0.00826647	4.58222	0.130582	0.133436	0.333871	4.83205	1.52411	0.317591	0.0055357	0.342031	1.29108
LOC123384802	0	0.136384	5.48072	0.915465	1.15448	0.0220274	0.289869	0.00537852	0.0494241	0.244676	0.388942	0.582477	0.027668	0.0349989	0.348753	1.14198	0.0841415	0.435377	0.418059	0.0794082	0.07667	0.0285704	0.00865649	0	0.506902	0.500934	0.233859	0.073715	0.696359	0.895171	1.28821	1.19478	1.24656	0.0470995	3.8534	0.117271	0.316557	0.575691	0.173026	1.00077	0.740897	0.0232902	0.782336	0.0734164
LOC123384796	0	5.94748	8.58594	15.8873	7.0437	13.1265	4.0888	4.97548	1.7023	4.67621	3.90234	15.2552	13.4482	4.07606	1.12179	9.06902	4.98567	1.05478	12.7354	7.56092	6.01406	4.85572	12.7355	0.307041	12.302	1.94695	1.4241	4.90509	9.14654	8.89771	13.5155	14.8807	15.066	5.89247	12.7142	4.33311	5.05804	9.79389	3.85091	7.82556	25.652	6.87034	8.68997	3.98282
LOC111560153	0	0.0524514	0.491413	0.234368	0.556652	0.504049	0.348258	0	0.0259619	0.0658694	0.0768493	0.348464	0.337666	0.0745913	0.0657812	0.40319	0.226518	0.0744177	0.188558	0.398064	0.505478	0.0341841	0.151477	2.44449	0.77979	0.0772186	0.148135	0.0122878	0.16161	0.0844354	0.658612	0.458325	0.714014	0.213552	0.492399	0.101026	0.0498851	0.704463	0.071662	0.161904	0.433602	0.248743	1.03686	0.214115
UBAC2	0.0439847	3.73265	4.88268	6.72915	4.34914	3.87482	3.53311	4.46803	2.97567	3.35149	2.97255	6.37722	9.46492	4.01784	1.62661	4.61658	3.24815	2.18787	4.98025	4.98993	6.09388	11.3455	7.62342	0.728845	4.73529	5.17336	3.42796	2.87542	4.64509	5.06552	3.67395	3.89465	3.52304	5.57798	7.10912	3.46056	3.26522	4.24322	4.44056	5.33018	13.0437	3.62557	4.12285	5.74131
GPR18	0.702364	0.362655	5.84401	1.0803	2.24511	0.0455563	0.495452	0	0.189476	1.51809	0.590383	0.428323	0.152592	0.0844474	1.42877	7.62746	1.8693	2.57266	0.144857	0.376595	0.232995	0.380791	0.0358061	0.0358843	0.26625	13.7118	10.7259	18.1643	0.819417	3.01628	0.822199	1.0563	0.475393	9.93578	11.6084	0.310447	25.83	0.108239	0.192686	2.18443	46.835	1.50663	0.995693	0.360614
LOC101101025	6.10887	1.14844	1.11183	0.20936	4.05564	0.872356	0.170626	0.00330243	0.0236852	1.23191	3.76841	0.0476858	0.44698	0.0692438	0.297107	4.0155	0.902718	0.557277	0.0860113	0.983546	0.178482	0.350846	0.0460644	0.029001	0.237135	22.1597	15.2319	25.007	0.329276	0.709325	1.95904	1.54808	2.79377	2.36174	1.84834	0.0768054	15.7618	0	0.114411	0.467991	10.6806	5.43129	1.05432	0.137738
TM9SF2	0.568458	95.8187	67.5005	142.222	89.071	66.543	79.3886	93.3669	97.7112	97.4914	64.2956	128.905	205.725	73.8003	40.8789	112.034	85.2995	26.0803	64.8973	143.777	76.4309	272.282	157.315	19.1437	136.033	23.6065	18.0805	43.3283	115.109	118.525	84.0548	71.7718	93.5015	136.601	196.266	101.547	62.0283	106.333	206.107	104.388	102.898	96.2738	92.5892	132.117
CLYBL	0.0149487	1.8817	3.26922	2.65677	1.2007	1.86216	0.896097	1.11023	0.795661	1.99576	5.97286	1.71001	4.47068	1.32512	2.3053	1.09374	3.03668	1.68934	1.83243	1.32014	3.0401	3.94735	1.86647	0.13675	1.77361	0.43932	0.287402	1.4541	1.23916	2.00994	1.96261	1.93665	2.50845	1.17939	2.86883	0.654913	0.855408	1.47642	1.60181	2.17122	0.789867	1.80915	2.98436	1.8595
LOC109497201	0	0	1.13605	0.153924	0	0	0	0	0	0.346083	0.807545	0	0	0.0412535	0.620545	0.264799	0.191958	0.26881	0	0.551913	0	0.737171	0	0	0	0.144897	0	0	0.424555	0.554538	0	0.344011	0.750297	0	0.646775	0.530799	0	0	0	0.389884	0	0	0.340485	0.0432683
LOC111556737	0	1.673	11.0764	2.49182	0	0	0.548549	0	0	0	2.04267	2.96392	0	0.08348	0.699391	0	0	1.28572	1.00238	1.09725	0.179143	0.181724	0	0	3.68479	0.469139	0	0	0.343649	1.34659	0.875301	0	2.02439	0	3.27201	1.07412	0.530382	0	0.380958	0.860687	0	0.0218566	0	0.437786
ZIC5	0	21.8576	7.38857	118.381	0.19367	0.0154737	11.3997	0	0	45.995	0.0651725	12.2117	88.4137	0.0210005	0.0374508	0.0263021	0.46714	0.00970928	2.1157	31.8619	1.07864	0.537431	0.012162	0	8.8174	0.0604482	0.0193271	0.0144287	2.44167	0.735337	0.204082	0.119595	0.024842	0.0313449	1.4776	4.60012	0.08678	8.95216	0.243093	0.483642	0.0905154	0.0198476	0.169099	0.246048
LOC111560162	0	2.2506	1.31678	10.3834	0.0812415	0.0778916	2.05567	0	0	3.74923	0.0841193	2.04446	7.99225	0.0876637	0.0510575	0	0.121574	0.00814576	0.577908	3.25822	0.511492	0.037418	0	0	1.63124	0.154557	0.0648593	0.0053801	0.636832	0.175604	0.324412	0.0860028	0	0.0525947	0.26949	0.530799	0.0728056	2.09741	0	0.274691	0.0759394	0.129611	0.22699	0.111777
ZIC2	0	57.5886	18.475	703.794	0.503893	0.225454	42.135	0.0078643	0	104.215	0.0834787	46.3692	198.638	4.89247	0.0568399	0.821196	1.12016	0.015157	21.0713	49.112	0.799221	0.0789077	0.0601219	0.0126849	45.1529	0.0239657	0.0201142	0.098774	12.3149	1.04331	0.268285	0.248931	0.129268	0.036246	1.7467	15.254	0.0722512	46.9854	0.7979	0.476316	0.235504	0.0530352	0.316774	0.295205
LOC109499045	0	0.622625	2.94644	0.96145	0.809772	0	0.752046	0.0606633	0.0181283	0.367954	0.160984	0.0973281	0	0.0315248	0.0187907	0.175959	0.0331645	0.0974312	4.50948	0.284388	0.660815	0.176038	0.0732262	0.043488	0.363	0.200271	0.0517187	0.00343206	1.48573	3.6137	0.632343	0	0.0664761	0.0465988	16.7221	1.30504	0.0174165	0	2.90227	5.21256	0.968862	0.0222493	0	2.62791
LOC123378948	0	0.586019	1.19757	0.335705	0.598005	0	0.367663	0.0165922	0.00929686	0.11322	0.462327	0.129775	0.0398314	0.038801	0.219285	0.245447	0.0627987	0.149233	0.33761	0.142545	0.238933	0.0189739	0.0734371	0.0133813	0.0992852	0.180131	0.0424372	0.0133767	1.34105	3.01253	0.483485	0.112543	0.163639	0.0573542	12.7719	0.17365	0.00238182	0.201812	0.975152	2.1946	1.39123	0.0238512	0.204213	0.410499
PCCA	0.0185213	2.6151	4.90279	4.66643	1.9022	0.738646	1.95277	1.95742	1.19951	3.2164	5.51545	2.97492	4.80568	4.33835	2.274	1.71583	4.60806	2.25171	1.42203	4.78779	3.84098	12.8684	4.51507	0.16607	2.94403	1.1978	0.577003	1.50602	2.86547	7.69081	3.11939	1.47295	1.54957	2.21979	11.284	2.4364	0.965754	2.6599	4.81414	6.55835	2.97827	2.28021	2.22129	5.16496
GGACT	0.0108684	1.479	1.91049	0.631747	2.53443	0.862845	1.01782	1.19319	0.7262	1.8229	0.871537	1.25101	4.45703	1.89608	1.28658	1.32766	1.27617	0.564631	1.16335	1.50585	3.54983	3.84294	1.22531	0.309843	1.16389	0.814877	0.645399	0.935281	2.76648	3.19692	1.92211	1.35588	1.28564	6.15438	6.3042	0.629306	1.11527	1.03173	1.49422	3.19009	1.86594	1.38826	2.73481	1.61785
LOC102901352	0	1.76911	4.31322	2.49868	6.13248	0.321856	1.30764	0.33681	0.128329	3.24314	0.744833	1.04023	1.85581	0.379738	1.96253	1.69988	0.875101	1.32893	1.261	1.66684	2.42018	0.222811	0.223608	0.00905439	1.36041	1.35783	0.768121	0.380151	4.98723	9.01831	2.85655	1.67532	1.7716	2.15451	23.4503	1.03791	0.570521	1.61135	8.61251	12.6493	3.47969	0.384938	3.45448	3.94134
TMTC4	0.00525029	16.5562	9.29272	11.2902	11.4433	6.8293	6.74779	7.3594	4.70376	10.2643	2.73763	8.42872	32.4037	2.41538	1.38714	6.71653	4.78766	1.29666	8.76728	13.679	11.3458	21.1745	14.1454	0.876948	8.04713	0.668774	0.52828	0.404296	9.09104	10.4768	11.1183	11.9084	12.3773	7.02514	4.55462	14.8498	1.95691	7.23095	5.09179	8.89008	5.19025	6.59867	14.6651	12.7069
LOC109499053	0.007524	0	0.279532	0.0520766	0	0.0527059	0.252211	0.0257388	0.023075	0	0	0.247772	0.0970969	0.0977005	0.0159454	0	0.314983	0	0	0.134313	0.414326	0.926679	0.0414255	0.124548	0.462052	0.274528	0.197494	0.0982929	0.0574555	3.22699	0.439031	0.640137	0.338462	0.848194	2.32499	0.179584	0.177352	0	0.796166	1.95764	0	0.027407	0.460783	0.783181
LOC111557002	0	0	0	0	0	0	0	0	0	0	0	0	0	0.068596	0	0	0	0	0	0	0	0	0	0	0	0	0	0	0	1.65974	0	0.286009	0.831725	0.0583027	3.22636	0	0	0	0	0.206276	0	0	0	0
NALCN	0	2.01884	10.7382	9.57479	3.25149	0.138615	0.254436	0.0491611	0.0534095	1.60938	0.626289	16.1231	1.7849	0.00863694	0.00793808	0.336366	0.918509	0.050277	8.9054	3.81073	0.664087	0.140423	0.00382056	0.00790483	20.3932	0.0130678	0.00235023	0.000493879	4.93282	0.455914	0.320878	0.234767	0.246703	0.0883027	0.485004	8.29463	0.321153	18.7917	0.405892	0.331253	0.0128414	0.772456	0.361908	0.28901
LOC123384860	0	1.26572	10.1149	7.14595	4.74988	0.0386754	0.0925359	0.0283306	0.0423309	1.97616	0.877118	9.97706	0.867947	0	0.0136508	0.42731	0.254961	0.103137	5.87218	1.14905	0.347988	0.0306554	0.00759948	0.0203095	12.4884	0.0431673	0	0.00160282	3.09881	2.47809	0.24162	0.213514	0.310453	0.0391721	7.34612	6.75363	0.19521	10.5674	3.20155	1.83689	0.56559	0.327141	0.338121	1.69723
ITGBL1	0	6.73309	2.27132	3.08812	199.629	9.73934	0.545337	1.277	14.791	3.37717	1.76423	11.8262	56.2348	0.0668435	0.397557	34.9802	2.9216	1.62121	1.29862	38.6766	5.85694	3.21019	0	0.111701	3.06649	0.0295452	0.0212546	0	8.43425	2.72182	28.0504	17.4299	16.5556	0.268107	2.90843	1.86507	3.41974	6.14551	1.80966	2.19913	0.597254	10.8393	0.818239	2.63418
FGF14	0	3.29109	16.0584	20.2338	44.9289	1.81348	0.567965	0.20489	3.39455	2.75943	0.350558	11.4708	12.9308	0.0321618	0.0359081	7.74154	1.14638	0.276249	12.9239	14.1347	1.13983	0.133659	0.00650846	0.0340628	11.6392	0.0287544	0	0.00137271	5.04908	3.16776	5.95886	4.44656	4.36934	0.123632	5.92762	4.97522	0.823539	9.83723	5.41045	3.12971	0.17761	3.6927	0.446433	2.84478
TPP2	0.0153041	7.95563	7.19856	7.16986	4.09614	4.83263	3.32107	3.39441	3.33901	8.81209	4.14084	5.03289	5.90505	1.91263	2.30994	3.47371	4.77161	6.83	4.09995	4.51312	4.0744	2.19541	5.68927	0.204295	5.66346	4.73923	3.4229	3.93195	5.30876	9.43937	3.49121	6.63377	9.24492	2.04413	18.7945	4.4804	2.5651	3.88637	10.5051	7.14206	5.51663	2.59095	4.9828	5.24041
LOC111560175	0	2.4747	4.70705	1.46045	3.71651	0.316735	1.07933	0.309354	0.231114	1.40729	1.71029	0.930614	0.583502	0.468306	2.24653	3.14057	1.0993	2.21928	0.587494	2.24099	2.89487	0.612422	0.207455	0	1.07983	1.64977	0.923092	0.638819	3.07873	18.2838	4.50718	3.61375	4.53408	0.956468	40.8885	0.809405	1.18421	1.00339	27.4314	16.6648	0.617592	0.559985	5.76888	22.7371
METTL21C	0	0.630116	15.2384	2.59558	0.522441	0.20036	0.348645	0.0217434	0.0389861	0.544026	0.346206	2.93035	0.178963	0.0412673	0.233483	0.681139	0.0713225	4.49097	28.2444	0.20202	0.208741	0.0769997	0.0174975	0	2.01669	0.5715	0.389285	0.0350592	2.08708	1.36303	0.587227	0.245804	0.607586	0.0501069	2.56486	0.0758536	0.149821	1.48102	0.840722	1.58158	1.30225	0.0509357	0.778511	0.231872
CCDC168	0.0102484	2.55775	2.29274	0.448298	0.296516	0.0382929	0.49719	0.0392657	0.0440024	1.01434	0.267944	0.239617	0.0692536	0.028834	0.111781	0.434422	0.0408106	0.198203	0.534162	0.257107	0.872093	0.00931148	0.0315983	0	0.272722	0.455129	0.252864	0.032926	0.3193	43.6268	0.364781	0.180727	0.142915	0.106751	54.7738	0.0929519	0.225465	0.191037	28.7659	21.1309	1.5769	0.173962	0.985378	12.0542
TEX30	0.395963	34.6558	7.47739	8.81017	4.43042	7.44508	18.8925	5.93591	5.23574	33.246	10.7179	9.01154	17.0103	13.9327	5.17258	14.9959	13.83	2.42385	14.6842	15.934	20.4526	45.3598	12.4984	0.993285	5.62287	16.6573	12.1075	24.4097	9.29271	33.7132	8.20562	11.4085	12.24	10.776	73.4854	8.52314	17.6203	4.12319	51.0004	36.9057	60.6749	16.8816	26.3761	25.5283
LOC109499075	0.143891	6.55608	5.89711	2.87713	2.38935	1.6664	3.73601	2.88382	1.69608	6.00528	4.25525	2.70428	6.43525	6.49028	2.88209	5.49476	3.84108	1.03494	4.2896	4.79429	8.53315	12.1185	5.74571	0.15906	1.94878	6.77104	4.99775	10.6215	3.76255	11.8102	3.44893	4.00766	3.7268	5.08697	28.6729	2.49776	3.68008	1.34257	10.3548	14.5408	9.38032	4.00111	3.64948	7.73351
LOC123384888	0	0.31443	2.44507	3.24897	0.278079	0.444355	0.154644	0	0	0.197433	2.53378	0.208893	0	0.100021	0.0448111	1.2085	0.0109508	0.0278819	1.0597	2.19846	0.597619	0.403442	0.122238	0	0	0.115725	0.0555013	0.00736616	5.57059	2.8788	0.12338	0.196251	0	0.110015	4.65827	1.51405	0.498408	1.68921	3.32933	1.8383	1.29965	0.0246468	0	0.473186
POGLUT2	0.0140828	49.5065	7.97587	7.7402	39.0969	12.8649	31.5095	30.3529	15.4619	38.1534	31.322	9.20138	62.2203	15.7189	4.44467	38.6513	12.4531	1.90624	7.67094	38.9607	41.8371	50.2462	65.5908	1.4976	7.70484	5.08165	3.97655	10.5409	15.1827	6.95941	12.2265	11.9518	14.5418	12.0133	6.14359	8.84632	16.4919	7.36186	6.84947	8.82905	27.7647	15.252	31.6657	6.36609
LOC123384886	0.0101279	35.7061	4.0449	6.90474	24.8075	6.4206	20.8481	6.60013	4.16212	34.3592	21.3305	5.25293	11.6204	4.54656	1.42733	22.1289	1.75278	0.6121	3.66583	8.93832	17.1413	8.04149	26.8214	1.17355	3.3171	1.74209	1.3292	2.97255	11.0208	6.31361	6.69763	6.2667	8.94104	3.09784	8.17378	5.74116	8.77326	4.12979	9.3452	6.16612	17.534	2.58488	23.957	3.69962
LOC101085685	0.043744	16.3414	16.056	10.4823	15.1014	6.01577	8.98919	9.35688	7.81832	15.5107	21.7033	10.5214	27.87	8.3041	6.18958	14.9314	8.84203	6.319	11.2694	16.7202	14.4119	6.42082	13.5985	1.27111	10.7951	7.42622	5.61082	5.56237	16.8192	9.12016	11.7521	11.8242	12.379	8.43106	10.7178	8.31282	8.35687	8.28159	6.22194	7.8441	31.1942	10.9357	13.3669	6.33425
LOC101085945	0	1.02974	4.63419	0.729993	2.33723	0.146541	0.654313	0.184872	0.213856	1.20273	0.706885	1.00942	0.456759	0.276224	0.38587	1.04479	0.662342	1.32561	0.575982	0.809623	0.515846	0.0275719	0.187164	0.0149631	0.820763	0.104498	0.0406743	0.0959889	0.818704	2.15032	1.01722	0.492146	0.477059	0.171328	4.5229	0.977813	0.200893	0.880103	1.07238	1.60304	0.380983	0.321316	0.693953	0.830988
SLC10A2	0	0	2.52699	0.0382358	0.151358	0.0193489	0.404027	0	0.0338843	0	0.1003	0.18192	0.0388858	14.7311	0.119026	0.131556	4.24148	0.309591	0.0615244	0.0312683	0.0476469	0	0	0	0.0565414	0.0575898	0	0.0032075	0	1.08824	0.134311	0	0	57.2157	3.41411	0.395563	0.271282	0.0919433	0.327355	1.28326	0.226367	0.0134152	0	0.150475
LOC109499098	0	0	0	0	0.127199	4.14645	0	0.00992605	0.00889875	0	0	0	0	0.00538253	0	0	0	0	0	0	0	0	0	0	0	0.0831838	0	0	0	0.0578824	4.09166	5.79012	9.23472	0	0.0632908	0	0	0	0.049126	0.0485576	0	0.0295942	0	0.0112908
LOC111560119	0	0.1207	0	0	0	0	0.0222612	0.0333199	0.0149357	0.303154	0	0	0.0457075	0.295866	0.00688064	0	0	0	0	0	0.00646219	0	0	0	0	0.0571157	0	0	0	0.813634	0.307852	1.45019	1.67045	0.00767845	0.177046	0.116239	0.0191324	0	2.59728	0.892613	0	0.00236529	0	0.194244
LOC109499113	0	0	1.10938	0.193759	0.0102267	0.0261467	0.0796212	0	0.0114472	0	0	0.0921875	0.0875793	0.022503	0.00659193	0	0.0209419	0.00820313	0.0831397	0.0845075	0.0594339	0	0	0	0.0764061	0.126462	0.032658	0	0	4.83519	0.145199	0.0866084	0.0419767	0.00588501	3.19559	0.133634	0.0733183	0	2.81217	2.1721	1.0324	0.0978931	0	0.515614
LOC109499114	0	0	1.84907	0.0535115	0	0	0.0235601	0	0	0	0	0	0	0	0	0	0	0	0	0.0605913	0.0718119	0	0	0	0	0.0201494	0	0	0	6.11129	0	0.179393	0	0.0121897	7.4201	0.276798	0.030373	0	6.80661	4.31735	0	0.0413044	0	5.4152
LOC123383989	0	0	1.06802	0.154043	0	0.0259841	0	0	0	0	0	0	0.0348138	0	0	0	0.00640358	0	0	0.0775217	0.23478	0.153533	0	0	0.607447	0.0676713	0	0	0.0566513	4.21777	0	0.11476	0.166862	0.0058484	1.8879	0.17707	0	0.246946	0.125604	0.440438	0.607987	0.0468405	0	0.028868
LOC123384898	0	0.0597702	1.64075	0.242033	0.0264302	0.177383	0.0881894	0.0329998	0.0184903	0.0750605	0.0218931	0.198543	0.107513	0.00671047	0	0	0.0312248	0.0053001	0.228298	0.217354	2.59205	10.1475	0.0199169	0	0.345566	0.116277	0	0	0.110496	0.565275	0.0703604	0.298444	0.203411	0.00190117	0.815356	1.1944	0.00947429	0.341173	0.990144	0.396856	0.098821	0.25739	0.0369232	0.351911
LOC123384900	0	0	0	0	0	0	0.0843514	0	0	0	0	0	0	0	0	0	0	0	0	0	0.749893	2.24717	0	0	0	0.228444	0	0	0	3.63517	0	0.107046	0	0.0145475	4.2264	0	0.0362479	0	6.01427	2.12127	0	0.00112031	0	1.54385
LOC123384003	0	0.208695	0	0	0.276852	0.265437	0.372074	0	0.0258244	0	0	0.138647	0	0	0	0.451187	0	0	0	0	0.156427	0.097759	0.0231808	0	0.0861845	0.0219456	0	0	0	0.0839883	0.491343	0.423334	0.236744	0.358461	0.122448	0	0	0	0.142565	0.120785	0	0.129847	0	0.131065
LOC123384901	0	16.5948	0.265128	1.7123	0.764718	0.0888711	0.724895	1.4539	0.0389084	20.4343	15.2413	0.208893	0.178606	0.0411849	0.197169	7.55311	0.0602295	0.0278819	0.706467	0.0773327	0.00841717	0.447181	0	0	0.12985	0.0826608	0	0	0.0484399	0.0949056	0.370141	1.76626	1.23629	0.840117	0.368972	0	0.149522	3.16727	0.322193	0.720339	0	0.138638	6.60414	1.3576
EFNB2	0	154.454	16.5167	16.5408	22.9228	133.05	223.82	23.5181	18.4628	195.385	40.3789	40.402	80.5309	23.3764	2.7398	56.0076	16.87	5.41606	47.8944	25.1667	20.3139	0.700621	75.0783	0.232084	50.4379	0.246644	0.119355	3.51222	27.644	21.685	106.173	146.466	205.888	30.8289	33.0282	13.2476	18.0602	65.0753	29.8814	21.2126	32.1762	25.9149	40.6876	27.465
LOC109499129	0	0.77276	1.7504	0.0649331	0.308448	0.32279	1.16541	0.0613546	0.126934	1.18515	0.495969	0.127211	0.0595628	0.0675643	0.437013	0.68338	0.0633535	0.697977	0.233549	0.0494966	0.179771	0.134822	0.0683636	0	0.169448	0.0978007	0.0193137	0.0100931	0.0632117	2.39163	1.32024	1.57073	1.63223	0.101365	10.9539	0.105374	0.242815	0.404129	6.17276	2.1043	0.418343	0.0368533	0.219677	1.23959
ARGLU1	1.05175	157.275	66.9938	89.3549	187.312	21.1419	90.2661	37.7908	19.4107	197.951	79.4261	61.0659	195.039	37.5528	11.5974	138.196	68.232	21.4808	52.2948	161.208	183.963	51.1907	48.9073	3.14946	57.1214	47.969	32.1299	51.2583	126.639	88.5232	91.2035	90.8508	110.295	68.8858	117.966	65.9787	64.5735	48.8676	115.635	104.141	401.328	86.5727	123.914	72
LOC123384902	0.0537899	1.21153	1.86302	0.608763	1.06083	0.534648	0.57094	0.144845	0.193946	1.71942	1.01621	1.03528	0.7692	0.407554	0.141896	0.993178	0.0564216	0.381004	0.619301	0.274868	0.756431	0.612618	0.237625	0.073532	1.03041	0.348575	0.470634	0.105406	0.5523	1.55788	0.583201	0.486314	0.527266	0.232594	2.70068	1.13336	0.368378	1.30658	1.24452	1.2541	0.811657	0.281781	1.26871	0.813551
TRNAQ-UUG_2	0	2.08633	3.38809	1.55372	0	0	0.171018	0	0.344225	0	0	0	0	0.104104	0.237868	0	0	1.3567	0	0	0.744672	0	0	0	3.44637	0	0	0.0651688	0	0	1.09155	0	0.631132	0.0884829	3.26431	0	0	0	0	1.69943	0	0.109026	1.71845	0.109189
LOC109492638	0	0.516269	0.290212	0	0.228292	0	0.317392	0	0	0	0.378206	0.171493	0.586513	0.0386414	0.0294305	0.496065	0.0809117	0	0.695977	0.172322	4.82329	0.357497	0	0.0191566	0.426406	0.108578	0	0.0120947	0	0.0519425	0.202581	0	0	0.098529	0.302911	0	1.22752	0.346694	0.176339	0.796793	0	0.0859948	0	0.324229
NALF1	0	3.51124	19.1341	18.0541	0.200932	0.0817291	0.90663	0.0114035	0.0102233	1.86754	0.0151309	28.6375	4.41526	0.0861854	0.00588713	0.565613	1.86885	0.0183152	29.496	2.05807	0.365473	0.225893	0.0183535	0.00306558	33.0267	0.104253	0	0.00387096	9.73672	1.53153	0.162093	0.0902398	0.0937216	0.204976	1.59359	9.42835	0.0360136	33.6491	1.63671	1.54704	0	0.195495	1.07178	1.36605
LOC123384911	0	0	0	0	0	0	0	0	0	0	0	0	0	0.0125299	0	0	0	0	0	0	0.0497932	0.0227298	0	0	0	0.0469434	0	0	0.0458487	1.72921	0	0	0	0	1.85531	0	0	0	0.609916	1.12797	0	0	0	0.236553
LOC109492640	0	0	0	0	0	0	0	0	0	0	0	0	0	0	0	0	0	0	0	0	0	0	0	0	0	0.0240934	0.0808856	0	0.141189	5.48638	0	0	0	0	9.94793	0	0.0726362	0	13.8518	5.2674	0	0	0	2.8059
LIG4	0.00103836	2.74397	5.78656	5.88966	2.43244	1.31291	1.58924	1.99807	2.52291	2.75108	2.38251	4.7829	5.16873	1.92401	0.944041	2.00912	3.43062	1.74517	5.54218	5.42133	1.13154	1.01891	3.70424	0.226313	5.2607	1.22049	0.756335	2.44193	7.65764	4.13562	2.86031	4.78256	4.3119	2.1418	7.02217	3.63701	1.02696	4.04396	3.4468	3.47876	19.8914	3.34497	2.15016	3.02533
ABHD13	0.0879686	7.66162	10.7122	17.9558	5.27519	5.10709	5.76606	3.6055	3.63703	8.62715	7.13456	14.826	16.1006	4.61148	2.25005	7.20368	6.86287	4.65178	9.49674	11.4199	3.75785	4.01433	3.70277	0.757091	13.2591	4.34413	2.98432	4.58878	15.4282	7.72399	7.18301	10.1192	10.733	6.25118	9.86707	7.55675	4.0884	11.4918	6.46505	4.9888	25.0541	8.93085	8.6909	5.56815
TNFSF13B	0.440256	1.56705	1.31591	3.55338	4.90195	6.76676	1.83045	0.176242	0.0371305	1.53061	0.882249	2.93045	34.2501	1.97149	0.837072	47.5093	5.34233	0.159544	3.93818	3.10164	1.67021	0.834531	0.283654	0.219666	4.50605	6.42055	3.33978	4.64015	2.53933	1.7051	10.0206	3.85797	7.08436	15.3571	1.08971	4.33179	13.9616	5.49554	1.09032	1.38562	2.97472	8.0898	9.85978	0.778525
MYO16	0	5.71066	14.072	17.6431	0.0453635	0.278677	1.49262	0.0432662	0.049367	5.12458	0.0208757	38.5998	3.59778	0.0162099	0.00584808	0.024643	0.860857	0.373602	14.6729	3.23955	0.157755	0.0998239	0.208905	0.00845903	20.3682	0.0251712	0.014084	0.00110151	2.26702	0.839474	0.0715634	0.135173	0.2793	0.0692499	2.1953	9.20993	0.477899	25.084	0.784505	0.835076	0.0376915	0.643531	2.62295	0.404011
LOC109499157	0	0.158905	2.38203	0.31064	0	2.6948	0.332152	0	0	1.19734	0	0.211139	0	0.0178405	0	0	0.0110686	0.112727	0	0.0893306	0	0	0	0	0.262492	0.217229	0	0	0	0.0319754	2.36943	3.32255	2.01894	0.0202179	0.699261	0	0.251884	0.106711	0.108553	0.194156	0	0.211751	0	0
LOC123384012	0	0	0	0	0	0	0.136879	0	0	0	0.163106	0	0.0843136	0.491604	0	0	0.170593	0	0	0	0	0	0	0	0	0.0702384	0	0	0	0	0	0	0	0	0	0	0	0	0	0.0859066	0	0	0	0.0699138
LOC109492647	0	0	0.172799	0	0	0	0.0680338	0	0	0.347433	0	0.3676	0	0	0	0.443053	0.0224825	0	0.0621602	0	0.311054	0	0	0	0	0.11637	0	0	0	8.35979	0	0	0	0	9.78005	0	0.0292358	0	6.00053	5.68426	0	0.019879	0.227875	5.61786
LOC123384931	0	0.365175	0.598727	0.101982	0	0	0	0	0	0	0.133759	1.09173	0	0.00683311	0.00520431	0	0.187593	0	0.676899	0.00641524	0.11242	0.0520615	0	0	1.05564	0.134402	0	0	0	4.08742	0	0	0	0.00580776	9.36048	0	0	0.980918	2.97794	2.50978	0.150941	0.0161013	0	1.72721
LOC123384023	0	0	0	0	0	0	0.0141959	0	0	0	0	0	0.0218606	0	0	0	0.0020105	0	0	0	0	0	0	0	0	0.0728449	0	0	0.035573	0.82474	0	0	0	0.00367239	0.406445	0	0	0	0.611244	0.655216	0	0	0	0.584598
LOC109499163	0	0	0.0771878	0	0	0	0	0	0	0	0	0	0	13.52	15.0467	1.08849	1.30555	0	0.185109	0	0	0	0	0	0	0.0649766	0	0	0	0	0	0	0	9.08029	0.0604239	0	0.0652967	0	0	0.0198678	0	0.00807248	0.254474	0
LOC109499166	0	0	0.024587	0	0	0	0	0	0	0	0	0.523044	0	0.549986	0.0411407	0	0.0411293	0	0	0	0	0	0	0	0.108376	0.179377	0.0463229	0	0	8.66039	0	0	0	3.748	9.81604	0	0.0415986	0	15.1487	9.33676	0	0	0.486353	9.97122
LOC109499170	0	0	0.167402	0	0.460897	0.042085	0	0	0	0	0	0.0989216	0	0	0.059417	0	0.0777866	0	0	1.36283	0	0	0	0	0	0.093946	0	0	0.0917552	26.9656	0	0.0464675	0	0.00947235	29.2231	5.34149	0.141613	0	52.0027	19.6436	0	0	0	23.8514
IRS2	0.0189323	32.7552	28.0504	61.0411	28.0986	32.4056	29.5147	20.7075	9.70539	32.1031	16.711	53.7253	57.1437	29.468	49.9914	24.3377	23.1878	6.96893	72.0359	15.0613	12.4237	0.307275	2.78033	0.792861	46.6249	11.6883	8.84306	7.45827	21.8861	26.5714	45.9448	21.9141	25.6152	24.9821	22.6757	48.3511	7.92115	49.0828	11.4346	10.8952	75.1616	7.49787	92.2764	13.2883
LOC109499171	0	0.0826752	0.681627	0.138531	0.0731174	0.18694	0.0203308	0.0456459	0.0818436	0	0.666224	0.329554	0.0626161	0.0340341	0	0.278039	0.0978987	0.571832	0.148605	1.23745	0.0265582	0.124602	0	11.8414	0.409708	1.46056	1.54689	0.455156	0.0509466	0.399267	0.129765	0.335411	0.150059	1.08871	0.751876	0.955437	9.98601	0	0.762449	0.699132	0.410073	0.325648	0	1.10334
LOC109492654	0	0.133437	0.200026	0.149059	0.118011	0.0754301	0.00820347	0	0.0825595	0.251359	0.097753	0.1773	0.0505311	0.00998745	0	0	0.0232365	0.070995	0	0.00937668	0.435793	0.250025	0	0	0.440844	0.0280636	0.282643	0.0125042	0	3.46373	0	0.0416424	0.121098	0.0339551	1.83986	0	0.0846056	0	6.92776	4.08025	0	0.0496831	0.329725	4.24247
COL4A1	0	84.7	8.59693	7.11216	203.101	36.978	418.527	260.487	200.689	71.6761	199.352	68.8648	185.803	56.7299	12.6238	299.8	34.7911	18.5537	9.50215	34.3531	110.468	15.4739	471.354	0.895046	19.448	0.105633	0.0468378	0.254426	8.87067	16.4098	192.314	41.98	40.1752	42.8032	8.87054	17.4347	43.8896	25.333	4.16483	25.2276	17.1046	49.2741	64.1746	9.73115
COL4A2	0	173.008	36.4802	19.0674	365.012	117.757	785.838	518.221	362.309	124.834	529.923	148.937	444.071	215.475	26.6779	541.524	82.8832	23.0589	33.7704	35.6399	292.555	21.4304	943.813	1.22761	54.2274	0.383451	0.0670473	0.987517	22.7455	39.6991	409.455	73.0732	87.7989	114.114	19.5675	40.9974	96.219	67.5064	9.84077	56.4498	23.7545	92.0487	143.628	21.4329
LOC123384939	0	2.19565	2.82625	0.106639	4.79356	0.0959354	4.22559	0.240106	0.196881	5.5413	4.28928	0.62012	0.0943932	0.470389	0.429312	5.60554	0.192465	1.45224	0.095328	0.163233	0.470781	0.0492543	0.0647994	0.00314865	0.700858	0.0713853	0	0.00372736	0.209162	0.832404	8.40748	1.42337	1.35728	0.0566811	1.53719	0.551609	0.459004	0.484364	0.108689	0.410286	0.245519	0.0541474	2.58168	0.0324745
RAB20	0.300644	0.703723	1.97794	1.1676	1.35457	1.12321	2.51947	0.628511	0.163916	0.311911	0.576182	1.32006	10.5342	4.70639	11.1335	6.36408	5.24347	0.811231	2.45542	1.71042	4.75172	13.0442	3.74277	0.264194	1.23085	2.11991	1.78288	32.4564	3.96664	8.70456	2.58269	0.542576	0.413241	7.79558	7.27427	1.2757	9.94094	1.44553	9.20462	11.6836	2.87453	4.25072	3.63125	13.8273
LOC109499192	0	0	0.0807027	0	0	0.121732	0	0	0.0532952	0	0	0	0.0815492	2.38952	0.0552425	0	0.1125	0	0	0	0.0230591	0	0	0	0	0	0	0	0.663512	205.701	0	0.134409	0	0.0821972	129.131	0	1.77502	0	183.74	120.093	0	0.00844008	0	113.266
NAXD	0.385221	23.619	17.4624	36.8833	33.3543	63.1592	23.1539	8.84434	7.17665	38.0569	26.75	33.4655	55.2616	16.5988	15.248	69.727	24.1204	8.17228	42.0805	18.4963	48.8591	64.043	21.2167	3.40867	44.4688	12.5483	9.71738	15.4649	39.9246	22.7789	32.086	26.8005	28.5582	18.4173	19.8708	39.9801	31.9125	42.7906	25.0012	32.5938	139.023	29.4268	105.003	20.5692
CARS2	0.0329549	7.07856	9.42167	7.67441	4.48449	7.26215	5.96066	7.12815	4.39855	6.95551	7.61009	7.64185	15.919	5.51718	4.20497	5.5753	3.44488	3.89589	3.94548	4.97607	38.6466	15.275	5.07472	1.00643	8.79779	2.80923	2.09045	6.14028	8.38844	8.85436	3.11143	4.25877	3.9339	6.67455	8.27398	8.21804	5.8745	8.3301	10.3744	10.8895	7.69437	5.06742	11.1737	8.99654
ING1	1.17773	70.8912	51.2343	56.0899	43.2914	40.2398	65.1435	41.0732	23.8957	59.0742	17.2573	34.7167	132.234	24.4169	8.89352	39.5055	28.9317	19.8511	92.2998	32.8296	58.2548	34.1567	41.1909	4.93203	44.738	23.5022	15.526	52.769	54.5346	26.6722	33.0156	35.3057	33.1122	32.6016	30.3084	39.0762	48.3487	32.5597	36.0657	38.3412	72.4705	34.0246	51.7047	24.2753
ANKRD10	0.0935337	36.0923	32.2753	37.1706	35.1829	15.0625	34.731	16.546	8.75223	43.9586	22.5486	25.3342	74.9492	16.4634	4.28492	45.4024	27.8802	51.1583	25.5128	67.6176	61.6637	7.92281	38.3643	0.791354	25.5074	15.8639	11.9119	16.6971	44.3113	36.0784	40.1095	24.0502	24.4155	27.4789	52.025	22.424	28.2654	24.2157	28.5662	36.6501	75.3978	35.6258	51.999	21.0563
LOC109499207	0.0221151	11.8253	15.1879	29.9706	2.85995	0.844296	5.09487	0.801925	0.271294	9.42992	2.42923	30.387	6.05035	0.455366	0.0468678	3.37057	3.8598	1.62819	38.4962	9.1079	3.7899	0.973408	1.15977	0.101689	44.8398	0.374637	0.193495	0.461613	9.13625	2.40985	4.83911	1.64207	2.0394	0.950155	2.21092	17.4453	1.00347	42.3466	4.32459	2.33334	7.74803	0.97527	3.04732	1.3984
LOC123384963	0	1.00475	4.68372	7.37145	0.610908	0.136076	0.694038	0.0346709	0.0103609	0.262871	0.214683	5.70166	0.578656	0.0501353	0.00713575	0.201131	2.00335	0.128075	11.96	1.3709	1.36147	0.643741	0.0372008	0.00932051	9.61256	0.182697	0.206911	0.0186345	1.05127	0.610748	0.46276	0.235168	0.151972	0.123842	1.51678	3.20523	0.142675	8.47627	1.55864	0.955039	0.657559	0.217405	1.00861	0.542272
LOC109499197	0	0	0.0124969	0.0248338	0.00983056	0	0.00820039	0	0	0	0.00814302	0.0443083	0.00420934	0.00415987	0.00126732	0	0.182725	0.00985671	0.0399596	0.0187463	0.0119024	0.0407496	0	0	0.0642656	0.157799	0.0706342	0.0177076	0.123295	4.73736	0.0348935	0	0	0.00282852	8.40344	0.0107048	0.15329	0	10.6611	5.81463	0.128646	0.00849523	0.0137334	5.93461
ARHGEF7	0.0351752	15.2851	9.4921	10.1527	11.582	6.71142	8.39467	6.58627	2.97988	14.9325	11.0661	14.8354	10.4895	3.91185	1.95638	11.5202	5.33337	2.76761	14.1733	9.86722	15.6923	8.0699	9.35981	0.135827	15.2143	5.28809	4.0545	5.16454	6.2648	8.37911	8.73351	6.6114	7.92586	4.78859	14.4231	9.45555	5.43076	17.2882	9.14367	9.14424	17.6706	5.3584	8.10795	5.52549
LOC102899894	0	0.0482947	2.64242	0.18882	0.341692	0.0546005	0.0712576	0.0666602	0.0717135	0.727792	0.707591	0.385019	0	0.122901	0.692405	0.556857	0.701389	0.702332	0.0868077	0.179865	0.116355	0	0	0	0.159554	0.71607	0.306889	0.0837238	0.62497	98.4823	0.568517	0.180859	0	0.0737357	80.1485	0	1.15595	0.324318	244.153	89.4315	0	0.0274458	0.35801	82.1685
TEX29	0	1.62357	1.35517	0.618288	1.92538	0.333738	0.889252	0.224098	0.173509	0	0.919074	1.07863	0.363306	0.356275	0.309213	1.41821	2.62677	0.510437	0.13265	1.20053	0.857395	0	0.00819719	0	1.70669	0.457865	0.416849	0.127938	1.63716	65.533	0.810828	0.184246	1.00461	0.173707	99.5251	0	3.67316	0.297352	271.807	114.919	0.73209	0.199575	1.09414	103.598
LOC123384978	0	0.0995478	0.289123	0.118152	0.486968	0.0351705	0.25245	0.0206106	0.0100086	0.562562	0.200548	0.297608	0.0329853	0.0768374	0.0482362	0.149456	0.252658	0.179857	0.0447332	0.913318	0.50699	0.00810978	0.00276432	0	0.205551	0.09683	0.0175716	0.011369	0.237708	0.892645	0.175779	0.0232998	0.0677565	0.0348306	1.38354	0	0.157795	0.660146	0.565282	0.810206	0.0822936	0.0857127	0.169114	0.158738
LOC123384979	0	0.179356	1.25468	0	0.105747	0	0.00735097	0	0	0.150159	0.131392	0.0794375	0	0.00783087	0.00426017	0	0.0333148	0.0265072	0.382832	0.0357096	0.350495	0.00852335	0	0	0.197516	0.13831	0.0316589	0	0.0184206	1.48573	0.0234594	0.0186575	0	0	2.0696	0	0.0189534	0.0401482	2.17989	2.19287	0.098846	0.00117158	0	0.624213
LOC123384983	0.00757779	0.172158	2.03523	0.0874149	0.0692069	0	0.0586927	0	0	0.196544	0	0.545876	0.0533406	0.0070285	7.5836e-05	0	0.163795	0.00832692	1.40306	0.0618627	0.331401	0.274445	0	0	0.749739	0.138245	0.0552515	0	0.385775	0.894396	0.04913	0.0488419	0.0568136	0.0378342	2.25667	0.406953	0.0198466	0.86708	0.438349	0.780755	0.0517522	0.0242292	0.193365	0.233439
LOC123384985	0	0.0382669	1.05763	0	0.11845	0	0.0352886	0	0.018941	0.0720843	0.0841002	0.152537	0	0.0114567	0.00218145	0.0183847	0.0239893	0.0407196	0.068783	0.0504192	0.0758049	0.228743	0.00425049	0	0.142227	0.142852	0.0405279	0	0.0589526	1.97317	0.135141	0.0358264	0	0.00243439	5.83201	0.0184263	0.0394274	0.359768	0.656796	1.53402	0	0.00299958	0.212755	0.171983
LOC111560204	0	0.00802726	0.926547	0	0.0496948	0	0.00987001	0	0	0.181454	0.0117612	0.0533296	0	0.00240328	0.000915207	0.00771312	0.0335484	0.0142363	0.0541074	0.0050767	0.0734913	0.0604904	0	0	0.0795603	0.0523354	0.056677	0	0.0197864	1.97386	0	0	0	0	3.06847	0.0618448	0.00508967	0.312656	1.86992	2.56195	0	0.000629224	0.0495886	0.528078
LOC123384982	0	0	1.07739	0.0439928	0	0	0	0	0	0	0	0.104655	0	0	0.00449006	0	0.016459	0.0139688	0.0707879	0.0055348	0.025302	0.0481248	0	0	0	0.082826	0.0556122	0.00369044	0	2.72607	0	0	0	0.0100214	6.26195	0	0.0249702	0.423147	1.88322	2.06657	0	0	0	1.5891
LOC109499233	0	0.0849321	2.38716	0.284626	1.23937	0.0480108	0	0	0.0105097	0.106659	0	0.677102	0.257302	0	0.00484166	0	0.19079	0.022594	0.305323	0.137269	0.104586	0	0	0	1.12238	0.0982429	0.119934	0	0.157012	0.119632	0.0666537	0.106021	0.0770779	0.113464	0.373743	3.84429	0.0807765	0.11407	0	0.170679	0.140422	0.0199724	0.209868	0.0866766
LOC109499227	0	0.30002	0.91601	0.285858	0.0780399	0	0.133452	0	0.00436768	0.332444	0	2.38598	6.64975	0.00396278	0	0	0.064845	0	1.15388	0.0778192	0.00661412	0.0179717	0.00392055	0	1.51594	0.11135	0	0.00496135	0.201193	0.115415	0.0277002	0.0220303	0.0320324	0.0112271	0.258869	1.73359	0.0111898	1.037	0.048224	0.0885226	0.175072	0.0100294	0.0218045	0.0103908
SOX1	0	4.72014	3.39918	10.4959	0.104689	0	2.4452	0	0.00732393	11.9668	0	9.75162	16.1432	0	0	0.0284353	0.177274	0.00524836	4.25542	0.530281	1.72859	0.590661	0	0	6.30612	0.0622387	0.0208946	0.0221851	0.0364724	0.363247	0	0.0184707	0	0.00376523	0.850805	8.26491	0.0375272	5.64396	0.667129	0.201725	0.0978563	0.0023197	0	0.0789877
LOC109492657	0	0	0.624542	0.0273769	0	0	0.0361606	0	0	0.184664	0	0.0651275	0.0649655	0	0	0	0.0367025	0.00869287	0.881033	0.00516651	0	0	0	0	0	0.139166	0.207647	0	0.0755116	2.03179	0	0	0	0	5.17662	0.0944082	0.0310782	0.197495	5.89316	2.14497	0	0	0	2.26832
LOC123384056	0	0	0.0608596	0.136057	0	0	0.0199678	0	0	0	0	0.485504	0.061498	0	0	0	0.00565591	0	0	0.292426	0	0	0	0	0	0.0512316	0	0	1.15085	1.31529	0	0	0	0.0103311	1.45308	0	0.0514839	0	1.33126	1.4216	0	0.0445539	0	0.356964
LOC123384996	0	0	0.147795	0	0	0	0	0	0	0	0	1.2227	0.0414849	0	0.00249799	0	0.00305226	0	0.157528	0.31793	0	0	0	0	0.217154	0.0322555	0.0154696	0.0164251	1.9037	2.70918	0	0	0	0	3.10453	0	0.0138919	0.411973	2.80635	3.39876	0	0.0729904	0	1.76299
SPACA7	0	0.0216332	0.0121608	0	0	0	0.042559	0	0	0	59.0575	0.0287443	0.0614417	0.0534333	0.00986582	0.0623598	0.504046	0.00383663	0	0.101091	0.00463291	0	0	0	0	0.0250236	0.0458228	0.364898	0.573231	13.5479	0	0	0	0	21.6604	0.0208337	4.2744	0	66.188	20.2524	0	0.013142	0	21.2369
TUBGCP3	0.00306313	16.8725	11.9083	10.7267	8.28345	7.27726	8.41688	7.46552	3.66702	14.0528	5.22642	11.6557	14.0517	5.6829	3.23704	6.44478	4.11731	2.94117	14.1506	6.85203	7.12982	1.14958	13.8617	0.130989	11.6345	2.54304	1.74474	8.59216	10.2324	9.31315	8.4989	11.327	9.61106	5.15988	13.707	9.28605	2.96451	11.3357	8.08772	9.42815	19.3579	5.52444	5.99355	6.02452
LOC123385000	0	1.0529	7.1964	0.952133	1.46328	0.170054	0.357557	0.0692045	0.272986	0.75557	0.477489	0.199857	0.0759466	0.108828	1.75778	1.05987	0.153664	1.05814	0.180242	0.20787	0.225486	0.0245073	0.0445527	0	0.41411	1.10719	0.778807	0.209076	1.08137	4.05575	1.18043	0.813634	0.364012	0.1531	9.79606	0.0965702	0.286109	0	1.71253	2.5955	1.49212	0.0117903	1.05308	1.69247
LOC109492658	0	0	0	0.0569006	0	0	0.0250522	0.0140615	0.0126062	0	0	0.0338405	0.0192893	0.232564	0.0464599	0.0489439	0.080718	0	0.137336	0.0143175	0.0763601	0.0705444	0.0452629	0	0	0.117841	0.0359646	0.00715987	0.0941667	0.112747	0	0	0	0.0097213	0.298865	0.23301	0.0322967	0.136826	0.278373	0.278428	0	0	0	0.103967
LOC109499252	0.00689836	0	0	0	0	0.0724848	0.118247	0	0	0	0	0	0.420836	0.134365	0.722447	1.43744	0.0908054	0	0	0.207243	4.33423	0.703377	0.0379809	0.425046	0	0.0719143	0	0	5.12293	0.068806	0	0	0	3.04948	0	0	0.0271007	0	0.116794	0.090705	0	0.0854352	0.158425	0.275143
LOC109499271	0	0	0	0	0	0.685949	0.607466	0	0	0	0	0	0.262584	0.743851	1.01291	1.83224	0.344132	0	0	0.121814	1.98616	0.183589	0.11553	1.38938	0	0	0	0	2.83082	0	0	0	0	2.79558	0	0	0.109913	0	0	0.0780339	0	0.353295	0.642528	0.0816515
LOC102900112	0.000587658	0.504298	0.256307	0.259298	0.352075	0.279583	0.434046	0.417309	0.0758451	0.396293	0.439234	0.764409	3.10886	0.169226	0.382617	0.362693	0.240753	0.0341173	1.31987	1.26857	1.2017	0.0993711	1.46893	0.0196356	0.867123	0.0562849	0.0154251	0.0735866	0.226246	0.74416	0.528642	0.0212111	0.0291891	0.748838	0.530889	0.344229	0.293007	0.866405	0.392175	0.923551	0.141472	0.259061	1.14791	0.35187
LOC123385005	0.00388138	1.40687	0.572298	0.718628	0.914562	0.808878	1.59234	0.806627	0.223193	1.08725	7.59328	1.66163	10.4322	0.555899	1.03781	0.762563	0.143644	0.0447835	4.45241	4.93293	5.15158	0.282124	2.56174	0.0606806	1.45001	0.123917	0.10188	0.117187	0.46682	1.48564	0.905926	0.0450307	0.076388	2.16406	0.769016	0.914834	1.21605	1.14664	0.903574	2.79922	0.536781	1.05661	4.32321	0.900542
ATP11A	0.128903	42.2705	30.1062	44.2233	29.9626	14.1406	28.6214	12.9988	2.91059	33.8075	88.1926	26.5107	53.4263	19.6135	23.7954	104.234	44.3595	12.2489	14.1093	41.2344	21.9976	0.397207	12.2802	1.19284	24.9271	8.52154	5.50525	5.94035	60.3202	33.7866	27.6497	20.2251	19.5613	36.6664	17.6258	64.1631	8.93172	24.8061	10.8132	17.0617	139.511	23.7979	34.2259	19.1758
LOC111560214	0	0.579916	0.173862	0.0863744	0	0.043709	0.427825	0	0.0191361	1.35943	0	0.102739	2.15947	0.0752357	0	0.631517	0.184466	0	0.138983	0.0108669	1.42822	0.348027	0	0.177884	0	0.504118	0.600532	0.0606829	0	1.38475	0.0303407	0	0	0.0713245	0.952714	0.223394	0.428977	0.934646	0.448977	0.937289	0.639202	0.102279	1.74346	0.297431
MCF2L	0	1.2725	10.5624	15.1435	1.00106	2.32154	0.45512	0.000251184	0.000450375	0.938133	1.78242	8.5446	4.58733	0.110499	0.231665	1.98552	1.55642	0.313866	8.66044	1.37703	0.86777	0.4725	0.0139473	0.0517244	12.2063	0.31977	0.134271	0.0565736	5.03121	0.944761	1.86268	1.66115	1.71304	1.17248	0.423358	5.32162	0.115673	11.7197	0.140166	0.547786	1.54726	0.653439	2.09268	0.325554
LOC109499308	0	0.511195	4.05788	3.91942	0.698696	1.97025	1.27995	0	0.0230024	1.40066	0.68089	1.11147	2.90375	0.413922	15.6687	0.714458	1.25921	0.280222	2.13006	1.69486	0.48269	0.393736	0.0412953	0.0689757	3.53126	0.302986	0.131248	0.0631451	0.916397	0.374051	0.620005	0.174034	0.71697	0.543975	0.299934	1.25314	0.0589313	1.12349	0.412704	0.212183	0.537844	0.305993	1.20575	0.0802607
F7	0	0.562979	0.28633	0.179682	0.711278	0.0909266	4.63785	0	0.0398083	0.201999	0.0589178	0.106862	0.380702	1.46277	216.012	0.154556	17.9581	0.0855804	0.0361403	0.0536895	1.04203	0.596228	0.0915659	0	0.132853	0.257947	0.0851775	0.00376827	0.123901	3.44708	0.063117	0	0	0.833966	4.76601	0.154907	0.203974	0	7.78787	7.17411	0.0664857	0.0457056	3.27908	2.32974
F10	0	0	0.163389	0.0405859	0.449849	0.369686	10.6992	0	0.00899173	0	0.0266162	0.193101	0.0550344	0.0244745	500.696	0.122187	57.1174	0.161088	0	0.00382963	0.0583563	0.0813961	0.0242137	0	0.0600166	0.191029	0.0769581	0.0136186	0.0671668	0.541007	0.285132	0.340152	0.197835	2.49392	1.23641	0	0.172773	0	0.397114	1.0952	0.0600701	0.00569589	0.0897776	0.236733
LOC123385018	0	0.10704	0.120342	0.104625	0.496993	0.105889	1.75538	0.0147745	0.0463589	0	0.00980185	0.0622235	0.197606	0.0305445	75.3589	0.0578536	9.56891	0.0450856	0.0961997	0.0117527	0.0673373	0.00926514	0.0282374	0	0.0221021	0.151955	0.0566822	0.0376144	0.123676	0.771361	0.094504	0.141969	0.0728559	0.341324	1.2443	0	0.0805937	0	0.447871	0.728782	0.420314	0.0127167	0.0661241	0.165958
PCID2	0.0800815	14.2926	7.24861	8.62676	9.51766	8.22646	12.7331	8.11745	5.54242	13.3135	6.00652	7.91146	22.0221	8.72365	4.98173	8.92487	7.77116	2.57609	7.19481	13.898	15.9458	18.9428	12.898	0.673588	7.30679	4.14237	3.29401	10.915	10.5451	16.8883	8.17268	9.95177	9.989	7.27314	22.8536	4.70856	7.2743	6.0709	15.1767	19.7358	16.4274	8.67965	12.3954	11.7018
CUL4A	0.0653123	79.5864	87.7831	104.102	56.1362	41.4305	43.8382	58.9764	40.439	77.4534	189.655	96.4471	113.638	55.1625	64.9394	54.1495	94.4011	179.587	80.2956	102.684	93.4675	16.4788	73.3525	4.28675	99.9991	26.0496	19.9161	44.2584	105.845	206.453	85.054	64.0427	67.2754	45.0481	388.675	65.3432	28.0675	79.3024	300.855	241.962	107.398	69.2168	46.4981	129.132
LOC111560228	0.00121503	3.08663	6.09402	1.9006	4.70057	0.195761	1.32554	0.958073	0.64838	4.15987	3.45245	1.54047	1.51668	1.02102	4.14572	2.43054	1.57998	2.42463	0.933702	1.75	1.84764	0.0668505	0.612108	0.0268172	1.51719	1.92848	1.13751	0.77637	3.72062	11.0147	3.02498	4.28533	4.97382	1.3362	15.5262	1.79804	0.895002	0.930229	7.00711	6.4234	4.53071	0.763022	3.08804	1.32088
LAMP1	223.259	383.518	214.994	418.04	724.826	597.436	351.896	661.8	418.617	310.544	435.643	489.93	1432.75	441.889	251.531	841.664	493.426	151.389	394.902	445.275	592.407	199.439	675.678	20.5936	455.324	207.603	153.527	244.342	500.64	852.773	549.177	459.299	492.57	380.938	647.084	800.875	339.135	460.483	850.585	656.214	237.908	349.487	551.287	442.034
GRTP1	0	9.99358	3.1488	2.44128	1.2884	18.8547	18.9925	1.1246	1.56483	8.23351	14.6577	3.77777	87.9823	14.2897	15.8499	26.7891	8.5843	4.2973	2.82221	80.9379	24.2397	44.2072	1.02284	0.554261	7.85102	1.61984	0.479391	2.09764	151.146	36.2054	12.5885	18.3814	12.2658	120.287	20.8648	1.10342	1.92379	4.78752	18.7993	31.6894	5.78826	18.0958	6.94689	15.4323
LOC111560226	0	0.722168	0.334606	0.308018	0	1.51416	2.26024	0.00362471	0.00649913	1.20372	1.81798	0.471053	6.14575	1.94835	2.12876	5.50079	0.54358	0.491346	0.141607	3.40558	2.65167	4.42098	0.12251	0.0545677	0.824209	0.207111	0.0185415	0.212863	14.5723	4.79281	1.19532	1.5735	1.25119	17.2448	2.41905	0.531093	0.183156	0.14108	2.28727	3.87905	2.23603	1.09279	0.989578	1.50596
LOC105260444	0	3.36226	0.263825	0.899652	1.92759	0.254691	0.149576	2.24658	0.440447	0.905302	107.691	0.718388	1.11116	0.0750334	0.0154106	1.81827	6.04562	11.5224	0.830098	0.397341	1.36714	0.0605632	8.27124	0.0200618	4.40044	0.153981	0.127247	0.00105552	3.53301	10.2493	7.88063	0.449941	1.85533	0.587582	13.687	0.0433904	0.264248	1.3918	11.946	10.6271	0.0744924	1.75956	0.139166	5.93507
LOC101091336	0	14.6821	1.53953	2.2684	3.52292	0.152663	0.561947	5.11116	2.75573	6.91345	226.918	1.71137	2.3109	0.14305	0.0201323	3.63293	11.6919	44.9905	3.24863	1.99847	1.84491	6.10445	28.1652	0.334545	8.27881	0.0917505	0	0	8.73065	6.84303	16.9269	0.75852	5.57578	0.289423	3.37021	0.500159	0.707983	3.57136	4.10485	6.3738	0.103041	5.61675	0.333665	5.55624
DCUN1D2	0.0174111	6.72091	22.4521	18.8417	7.3989	2.97596	3.20072	1.60295	1.25117	3.14985	77.3389	23.3503	13.1745	1.9178	2.91463	5.94997	21.7174	118.555	24.8737	14.4595	14.6373	4.99278	2.89383	0.301023	24.7615	1.49603	0.517951	3.50891	12.0791	6.13754	18.9433	3.07376	5.19378	2.64908	3.75032	14.8411	5.8175	17.0682	3.43053	7.23331	2.36331	14.2219	15.088	6.02054
TMCO3	0.0218928	8.2881	9.12184	10.4843	10.1467	3.93444	5.17876	4.4756	6.9982	6.25522	18.1425	9.2678	24.0922	6.31704	2.7412	9.43138	5.60254	1.3164	4.78134	13.9413	11.8442	15.7851	11.4775	0.933381	8.79715	2.43862	1.72396	1.9067	9.03941	9.79035	6.60873	5.05448	5.0645	7.47773	9.2769	12.5932	3.39729	8.17651	8.47885	9.98511	6.69905	7.46071	9.32828	7.36087
LOC102900920	0.0162308	0.844755	0.429641	4.51605	1.15622	0.545745	0.954595	0.477504	0.0497773	0.530429	0.987209	4.2225	4.63091	0.894221	0.0814071	0.657087	0.843395	0.0535059	2.16916	1.46495	0.721488	0.2933	0.781927	0.179116	2.92376	0.0888316	0.0887567	0.508889	2.23097	0.947054	0.915507	0.552361	0.784889	0.977557	2.40742	1.04597	1.22426	2.26914	1.59383	1.22681	0.731592	0.659804	1.16795	0.890527
TFDP1	0.498741	26.4412	12.7855	28.5694	19.6652	16.6901	18.4924	26.5312	13.2156	25.5925	11.6477	17.5084	44.5021	22.0089	2.00454	13.3977	8.04743	9.16541	14.2223	13.4931	14.0237	18.2182	32.2311	0.969102	16.0344	4.11829	2.68334	31.2477	16.7468	16.724	12.8739	19.7581	18.2911	13.3556	26.6595	12.822	7.84428	15.4803	18.5394	21.3526	22.7751	14.3362	9.78355	12.2782
ATP4B	0	0.26768	1.08675	0.398691	0.315646	0.0252193	0.208449	0.147789	0.165617	0.672315	0.653654	0.118557	0.591309	0.0651144	0.577316	0.471542	739.662	0.134507	0	0.664619	0.143314	0.0527	0.0396435	0	0	0.16889	0.157498	0.240387	2.28183	0.502725	0.140048	0.167073	0.404877	0.0567626	0.746019	0.257788	0.056574	0	0.213336	0.545102	0.295046	0.0489588	0.16536	0.0560366
GRK1	0	0.00789064	0.019221	0.00881442	0.0139569	0.0825185	0.0155232	0.00435652	0	0	0.0317927	0.0891173	18.1769	0.0206708	1.31976	0.0113728	0.0772221	0.0041982	0.0815527	56.7856	0.00770989	0.00208917	0	0.0076125	0.0391031	0.0311157	0.00835686	0.0040668	173.213	0.206411	0.00154812	0.00246247	0	0.0145572	0.238429	0.0303961	0.0137584	0.042391	0.202137	0.225169	0.0782759	0.00386572	0.0194978	0.0828996
LOC123385034	0	0	0	0	0.444297	0.0473308	0.0720651	0	0	0	0.0153345	0.584072	1.99755	0.296895	0.847222	0.281583	0.0167675	0.0148493	0.357436	6.69794	0.0526729	0.494529	0	0	0.103733	0.0682362	0.0147794	0	33.8792	0.480174	0.188915	0.0130649	0.0759862	0.0372856	1.30799	0.0403174	0.00663603	0.337364	0.343186	0.576801	0	0.0221507	0	0.336866
TMEM255B	0	0.0627524	0.188135	0.464405	0.776969	0.177365	0	0.00866158	0.0310606	0	0.0459709	2.50139	2.35853	0.0598849	0	0.54267	0.0633798	0.0111291	0.0563973	1.24793	0.174705	0.181483	0	0	0.414637	0.184767	0	0.00808557	2.5522	0.505089	0.246237	0.0391669	0.0569493	0.0758492	1.58321	0.543899	0.09947	0.210703	0.492981	0.730411	0	0.0368918	0.387654	0.206903
GAS6	0	24.1483	95.9342	148.91	349.587	226.758	47.6399	257.531	367.932	21.9397	371.655	143.747	920.723	84.9307	3.67005	303.427	191.527	21.3216	166.205	85.3675	622.882	29.9209	51.0337	2.24403	152.879	2.20061	0.979507	2.98616	66.2608	148.264	294.861	249.079	209.314	41.0112	35.994	135.55	107.312	143.438	93.292	173.085	135.171	164.401	411.419	167.674
LOC123384068	0	0	0	0	0	0	0	0.0219039	0.137459	0	0	0	0	0	0	0	0	0	0	0.00557567	0.0594738	0	0	0	0	0.137672	0	0	0	1.94788	0	0	0	0	4.98136	0	0.0754637	0	2.76437	2.94415	0	0.0031098	0	1.47625
CA1H13orf46	0	0	0.0086857	0	0	0	0	0.0191944	0.0114719	0	0	0	0	0	0.0092486	0.011135	0.00807196	0.0164416	0	0	0.00248175	0	0	0	0	0.0901766	0.0654569	0	0.157104	22.9176	0.018189	0	0	0.00294885	20.5067	0	0.488618	0.0311284	69.8622	35.4367	0	0	0.0286352	24.0132
RASA3	13.4852	13.9486	13.1528	18.3284	13.9517	7.60384	10.3851	35.6139	30.9007	11.423	8.85461	16.5312	18.0037	6.40919	1.81134	20.5133	10.0936	3.57701	12.9274	8.00901	10.995	1.71063	36.4212	0.104687	25.0596	170.363	173.119	7.68627	10.1606	8.22719	16.6393	5.84088	6.56543	4.35806	13.1298	10.1295	18.0217	20.4164	10.0684	9.34404	56.7401	8.6169	24.9336	5.29408
LOC109492661	0	0	0.0856978	0	0	0	0	0	0	0	0	0	0	0	0	0	0.0238927	0	0.205518	0	0.0122432	0	0	0	0	0.240468	0.161458	0.0428576	0	5.75186	0	0	0	0	15.3626	0	0.0724958	0	22.9636	8.10272	0	0	0	9.17335
CFAP97D2	0	0	3.5816	0.237245	0	0.160074	0.0696362	0	0	0.177808	0	12.2284	2.19831	0	0	0.272093	11.1	0	0.381746	0.383052	0	0.21339	0	0	9.12152	0.163777	0	0	0.0872498	0.0569813	0	0	0	0.16213	0.0830738	1.22719	0	20.0622	0.241806	0.0273152	0	0.0277461	0.699728	0.0778053
LOC111560168	0	0	0.0963169	0.107663	0.2273	0	0.0948036	0	0	0	0	1.02448	0	0.0769468	0.0219769	0	0.102938	0	1.03943	0.198663	0.316486	0.0680478	0	0	0.212276	0.189185	0	0.0481683	0	1.13777	0.2017	0	0	0.0327002	2.11116	0.495027	0	0	2.10686	2.35106	0.42493	0.0503653	0	1.48295
CDC16	0.0442682	19.4362	14.3993	14.6198	9.03739	4.77066	14.0432	9.40611	5.27788	21.2725	7.856	14.8769	16.1758	7.67587	3.10385	12.5878	6.89936	4.95371	8.97642	16.3057	22.5917	25.4803	10.4274	1.5383	16.0076	5.013	3.40947	9.12578	16.4381	14.4528	9.58695	10.4939	10.5731	6.06346	23.7889	9.59403	9.89518	13.9308	19.0532	17.1482	43.8859	9.0978	16.3771	11.5459
LOC111560393	0.0175763	11.5581	5.915	8.10622	6.1995	3.93574	9.84811	0.755554	0.298305	8.75281	2.01046	6.04851	11.7246	2.46301	2.00109	4.63562	2.26105	0.699164	5.90496	11.8624	6.13613	1.18352	1.25968	0.413793	6.87199	0.697833	0.266661	0.966427	12.9542	9.03149	3.01422	2.59191	3.91376	1.24704	16.0617	3.98539	3.52845	7.28403	10.9161	9.16118	16.985	2.46477	13.0692	4.71063
UPF3A	0.00298056	5.11826	5.58654	6.92889	2.93428	0.747673	3.14585	1.80873	0.409905	4.96436	1.37619	7.35666	6.88933	1.22962	0.23928	2.1008	1.07457	0.143927	9.27576	4.25827	4.3397	2.58479	2.21137	0.0613684	7.21133	0.346934	0.280589	1.74624	8.54569	3.06737	1.56473	1.77743	1.8324	0.816381	5.51399	3.65978	1.22753	4.87801	5.55278	4.48553	4.31311	0.996103	2.11266	2.53733
CHAMP1	0.00950637	29.7208	7.09396	25.295	8.84917	7.48055	18.2663	7.64973	0.370507	31.6714	5.53758	16.9701	14.8182	5.98418	0.787535	9.1262	4.72677	1.55401	13.3312	11.5464	13.9332	2.12593	12.2492	0.227666	18.2475	0.774754	0.415879	8.31064	22.9441	15.8654	8.87719	9.81125	11.4103	3.25591	21.0583	11.2717	5.80893	15.7889	23.6797	13.8782	30.7006	4.89841	10.9099	10.3203
LOC109499405	0	0.315504	0.327706	0.190318	0.0223223	0.0998756	0.236886	0.0139355	0.0374796	0.665641	0.0369809	0.301833	0.200722	0.0420341	0.0201439	0.0242525	0.0484976	0.0223817	0.362946	0.391088	0.456755	0.280675	0.0280356	0	0.208469	0.0849338	0.0356422	0.0351827	0.505496	1.75223	0.108945	0.0708917	0.0687185	0.0176626	4.66492	0.206614	0.0400089	0.169498	1.31904	2.54127	0.083462	0.0711017	0.218291	1.17499
LOC101099772	0	0	0	0	0	0	0	0	0	0	0	0.184375	0	0	0	0	0	0	0	0	0	0	0	0	0	0.145918	0	0	0	0	0	0	0	0	0	0	0	0	0	0.00892339	0	0	0	0
LOC101094075	0	0	0	0	0	0	0	0	0	0	0	0	0	0	0	0	0	0	0	0	0	0	0	0	0	0.0948117	0.0795748	0	0	0.136071	0	0	0	0	0.0661265	0	0	0	0	0.0289904	0	0	0	0.00442376
LOC101100025	0	0	0	0	0	0	0	0	0	0	0	0.150467	0.0857673	0	0	0	0	0	0	0	0.00606294	0	0	0.0756354	0	0.0595411	0.239868	0	2.54708	0.0911482	0	0	0	0	0	0	0	0	0	0	0	0.0177533	0	0
LOC101100275	0	0	0	0	0	0	0	0	0	0	0	0	0	0	0	0	0	0	0	0	0	0.00492402	0	0	0	0.088983	0	0	0	0	0	0	0	0	0	0	0	0	0	0.0155475	0	0.00236892	0	0
LOC101094566	0	0	0	0	0	0	0	0	0	0	0	0	0	0	0	0	0	0	0	0	0	0	0	0	0	0.0259004	0.086952	0	0	0	0	0	0	0	0	0	0	0	0	0	0	0	0	0
LOC101100535	0	0	0	0	0	0	0	0	0	0	0	0	0	0	0	0	0	0	0	0	0	0	0	0	0	0.191264	0.0856143	0	0	0	0	0	0	0	0	0	0	0	0	0.0389884	0	0	0	0
LOC101094818	0	0	0	0	0	0	0.030475	0	0	0	0	0	0	0	0	0	0	0	0	0	0	0	0	0	0	0.0912215	0	0	0	0	0	0	0	0	0	0	0	0	0	0.00398466	0	0	0	0
LOC101100780	0	0	0	0	0	0	0.0441393	0	0	0	0	0	0	0	0	0	0	0	0	0	0.0128132	0	0	0	0	0.0188748	0	0	0	0.0240786	0	0	0	0	0.0877615	0	0	0	0.040872	0.0961884	0	0	0	0.042272
LOC101101026	0	0	0	0	0	0	0	0	0	0	0	0	0	0	0	0	0	0	0	0	0	0	0	0	0	0.155241	0	0	0	0.0990205	0	0	0	0	0.252636	0	0	0	0	0.0672458	0	0	0	0.0482885
LOC101101283	0	0	0	0	0	0	0	0	0	0	0	0	0	0	0	0	0	0	0	0	0	0	0	0	0	0.103926	0	0	0	0	0	0	0	0	0.21745	0	0	0	0	0.023833	0	0	0	0
LOC101095073	0	0	0	0	0	0	0	0	0	0	0	0	0	0	0	0	0.00855141	0	0	0	0	0.0100014	0	0	0	0.0774591	0	0	0	0	0	0	0	0	0	0	0	0	0	0	0	0	0	0
LOC101080353	0	0	0	0	0	0	0	0	0	0	0	0	0	0	0	0	0	0	0	0	0	0.11036	0	0	0	0.0518008	0	0	0	0	0	0	0	0	0	0	0	0	0	0.015839	0	0	0	0
LOC101095308	0	0	0	0	0	0	0	0	0	0	0	0	0	0	0	0	0	0	0	0	0	0	0	0	0	0.103602	0.086952	0	0	0	0	0	0	0	0.0722569	0	0	0	0.168256	0.0712756	0	0	0	0.0193355
LOC123378950	0	0	0	0	0	0	0	0	0	0	0	0	0	0	0	0	0	0	0	0	0	0	0	0	0	0.0938785	0	0	0	0	0	0	0	0	0	0	0	0	0	0	0	0	0	0
LOC101081111	0	0	0	0	0	0	0	0	0	0	0	0	0	0	0	0	0	0	0	0	0	0.019186	0	0	0	0.235271	0	0	0	0	0	0	0	0	0.138181	0	0	0	0	0	0	0	0	0.00924408
LOC101084082	0	0	0	0	0	0	0	0	0.023846	0	0	0	0	0	0	0	0	0	0	0	0	0	0	0	0	0.141851	0.0680309	0	0	0.038777	0	0	0	0	0.113067	0	0	0	0	0.0557658	0	0	0	0.00756403
LOC102899961	0	0	0	0	0	0	0	0	0	0	0	0	0	2.24499	0	0	0	0	0	0	0.0703301	0.428061	0	0	0	0.0920903	0	0	0	13.5249	0.171818	0	0	0	32.5638	0	0.138816	0	19.2186	20.0909	0	0	0	16.2419
LYPD8	0	0	2.09169	1.70043	0.224373	1.29073	2.24599	0.017509	0.0313939	0.796511	0.464642	0.421372	0.288222	1.99859	0.169936	0	0.114866	0.191224	3.93317	0.173821	0.0339577	0	0.1409	0	0.628629	0.0666963	0	0.0356611	0.312676	1.02102	0.199103	0.316697	0.575603	1368.88	2.12119	0	0.0402149	1.36297	1.25651	1.21138	0.419459	0.124292	0	0.38837
SH3BP5L	0.0149443	31.0009	32.7054	35.4784	20.7183	39.1366	22.2944	13.3559	9.54679	28.7451	13.9058	40.1823	57.1518	16.4655	5.12384	29.9033	12.0281	6.77887	23.1679	27.9124	29.1728	5.39879	43.9684	0.929045	47.9517	4.47902	3.35386	12.9685	33.9304	16.4896	24.954	31.3008	30.3273	15.7395	21.4543	36.0616	10.418	50.7275	13.6882	24.9849	19.2743	14.6528	25.7919	14.7546
ZNF672	0.00134505	2.12794	1.47644	2.39723	1.4311	1.23273	1.28499	0.690191	0.213128	1.17916	7.01087	0.893256	3.521	0.835859	0.532414	2.57585	1.25911	1.88398	0.69407	1.81301	1.32371	0.664339	1.28239	0.076691	1.44091	0.701096	0.551158	1.24023	3.71389	13.8379	1.053	0.835729	0.809269	0.796674	25.255	1.27345	1.31839	1.11932	13.2005	11.7074	1.23092	1.21763	2.0559	7.49367
ZNF692	0.00477571	4.60131	3.86348	4.40122	4.36901	3.62307	4.94885	0.732724	0.401311	4.86055	3.1562	2.30005	6.3468	1.24226	0.818453	6.55083	1.84532	1.25817	3.45984	4.29766	10.8326	5.6212	1.2746	0.23321	2.95234	1.56701	0.967323	1.0017	5.67362	7.22491	4.50511	5.99129	5.50238	1.59441	12.8459	3.1717	4.08724	2.51568	8.98715	8.05457	11.8835	2.9644	9.98428	4.62822
LOC111560286	0	0	0.0203237	0.0151452	0.0479623	0	0	0	0.0067108	0	0.0595935	0	0	0.00202956	0.00463733	0	0.00377753	0.0769438	0	0.00285817	0.0145177	0	0.00903571	0	0	0.054177	0.0191454	0	0	0.510168	0.0532007	0	0.0492167	0	0.704008	0	0	0	0.527924	0.415447	0	0.0023912	0	0.696079
TRNAL-CAA	0	0	0	0	0	0	0	0	0.348323	0	1.03106	0	0.532982	0.105344	0.481399	0	0	0.374414	0	0.0989017	0	0	0	0	0	0.296005	0	0	0	0.566421	0	0	0	0.71629	3.30317	0	0	0	1.4422	0.633561	0	0.027581	5.21672	0
TRNAE-CUC	0	0	0	0	0	0	0	0	0.406376	0	0	0	0	0	0	0	0	0	0	0.0576926	0	0	0	0	0	0.345339	0	0	0	3.63453	0	0	0	0	1.44514	0	0	0	0	1.00314	0	0.0965334	0	0.257807
PGBD2	0.0154418	4.63239	2.4113	2.9258	2.55965	0.923952	3.70374	2.92297	3.25386	5.17661	0.806047	2.54256	5.56159	1.67871	0.5886	2.49752	1.73053	0.762868	1.66244	4.73319	4.61794	7.90491	3.07131	0.157392	1.81755	1.46557	1.25537	1.8632	2.45662	3.39807	2.32768	2.47826	2.11285	0.973861	5.79381	1.38212	1.36494	1.98108	3.39872	4.75068	1.58188	2.3118	2.26569	3.5264
LOC111556715	0.0445815	0	0.828145	1.69711	1.87129	0.209237	0.452399	0.202836	0.0683624	2.77513	1.61886	0	2.47493	0.1654	1.81087	2.0331	0.846974	0.195955	0	2.54667	0	0.158873	0	0	5.47553	0.290472	0	0	0.851093	3.55733	0	0	0.250683	0	8.42773	2.66019	0.350283	0	5.15903	3.01693	0	0.452318	1.36512	0.635796
LOC101085852	0	0.0353477	0.00898889	0.020025	0.000748038	0	0.00341489	0	0	0.0634147	0	0.00335478	0.0138638	0	0.00083984	0	0.00115809	0	0.0113457	0.000354842	0.0024332	0.000617067	0	0	0.00417072	0.0314621	0.00534804	0	0.0132249	1.22949	0	0	0.00229135	0.000321241	2.70874	0	0.0024013	0	0.853769	0.772627	0.00208722	0.000618474	0.000779862	0.576585
LOC101086367	0	0	0	0.135037	0	0	0	0	0	0	0	0	0	0	0	0	0	0	0	0.00849462	0	0	0	0	0	0.127119	0	0	0	0.632445	0	0	0	0	3.47543	0	0	0	0.371609	0.291516	0	0	0	0.0474492
LOC101086869	0	0	0	0	0	0	0	0	0	0	0	0	0	0	0	0	0	0	0	0	0	0	0	0	0	0.0769795	0	0	0	0.589218	0	0	0	0	0.787444	0	0	0	0	0.182418	0	0	0	0.0287339
LOC101087125	0	0	0	0	0	0	0	0	0	0	0	0	0	0	0	0	0	0	0	0	0	0.0300746	0	0	0	0.349382	0	0	0	0.0742847	0	0	0	0	0.649805	0	0	0	0	0.029675	0	0	0	0
LOC101087376	0	0	0	0	0	0	0	0	0	0	0	0	0	0	0	0	0	0	0	0	0	0	0	0	0	0.0929758	0	0	0	0	0	0	0	0	0.0370548	0	0	0	0	0.0162452	0	0	0	0
LOC101087635	0	0	0	0	0	0	0	0	0	0	0	0	0	0	0	0	0	0	0	0	0	0	0	0	0	0.131977	0	0	0	0.101018	0	0	0	0	0.0736376	0	0	0	0	0.0807084	0	0	0	0.03941
LOC101087896	0	0	0	0	0	0	0	0	0	0	0	0	0	0	0	0	0	0	0	0	0	0.0250817	0	0	0	0.0518008	0	0	0	0.0247809	0	0	0	0	0.108385	0	0	0	0	0.0554366	0	0	0	0.0193355
LOC123385087	0	0	0	0	0	0	0	0	0	0	0	0	0	0.00725913	0	0	0	0	0	0	0.0103851	0.00790105	0	0	0	0.132583	0.136955	0	0.0298825	1.07337	0	0	0	0.00616985	2.54648	0	0.0922403	0	1.87166	1.05247	0	0	0	1.64836
LOC123386464	0	0	0	0	0	0	0	0	0	0	0	0	0	0	0	0	0	0	0	0	0	0.22735	0	0	0	0.0355714	0.119419	0	0	0.680677	0	0	0	0.0645583	1.56298	0	0	0	0.346623	0.532953	0	0.0397734	0	0.265552
LOC111556985	0	0	0	0	0	0	0	0	0	0	0	0	0	0	0	0	0	0	0	0.00672692	0	0	0	0	0	0.171131	0	0	0	0.0577887	0	0	0	0.0365395	0.30892	0	1.15324	0	0.147139	0.118504	0.633095	0.25513	0	0.101453
LOC102900767	0	0	0	0	0	0	0	0	0	0	0	0	0	0	0	0	0	0	0	0	0	0	0	0	0	0.0429808	0	0	0	0.123369	0	0	0	0	0.479631	0	0	0	0.139608	0.0131421	0.0844719	0	0	0
LOC101088904	0	0	0	0	0	0	0.0299106	0	0	0	0	0	0.0460602	0	0	0	0.0169445	0	0	0	0	0	0	0	0	0.127903	0	0	0	0	0	0	0	0	0	0	0	0	0.0830896	0.0234652	3.61978	0.00476708	0	0.0190968
TRIM58	1.34481	1.23444	0.0105139	0	0.111654	0	0.876195	0.0154897	0	1.26837	0.0822109	0	0.0212485	0	0.0151937	0.485235	0.191844	0.00786145	0	0	0.0149606	0.000754237	0	0	0	7.47879	4.556	0.00525804	0	0.0903262	0	0	0	0.0285564	0.32922	0	0.249039	0	0	0.0957648	1.02048	0.0486561	0.0693252	0.0308341
LOC101082541	0	0	0	0	0	0	0.123061	0	0	0	0	0	0	0	0	0	0.0174286	0	0	0	0	0	0	0	0	0.052623	0	0	0	0	0	0	0	0	0	0	0	0	0	0.00804522	0	0	0	0.0147318
LOC101089671	0	0	0	0	0	0	0	0	0	0	0	0	0	0	0	0	0	0	0	0	0	0	0	0	0	0.158878	0	0	0	0	0	0	0	0	0.147746	0	0	0	0	0.0161933	0	0	0	0.02471
LOC109492694	0	0.137632	0	0	0	0	0	0	0	0	0	0	0	0	0	0	0.0862807	0	0	0	0	0.241065	0	0	0	0.0868372	0	0	0	0.0553892	0	0	0	0	0.242258	0	0	0	0	0.026552	29.8094	0	0	0
LOC109499504	0	0	0	0	0	0	0	0	0	0	0.0567185	0	0	0	0.0220681	0	0	0	0	0.0108811	0.0165808	0.381597	0	0	0	0.0651326	0	0	0	0	0	0	0	0	0	0	0.0245451	0	0	0.00497887	234.894	0	0	0
LOC101089917	0	0	0	0	0	0	0	0	0	0	0	0	0	0	0	0	0	0	0	0	0	0	0	0	0	0.035252	0	0	0	0	0	0	0	0	0	0	0	0	0	0	1.66277	0	0	0
LOC101082797	0	0	0	0	0	0	0	0	0	0	0	0	0	0	0	0	0	0	0	0	0	0	0	0	0	0.0308488	0	0	0	0	0	0	0	0	0	0	0	0	0	0.00404831	0.520415	0	0	0
LOC105260451	0	0.253431	0	0	0	0	0	0	0.0156801	0	0	0	0	0	0	0	0	0	0	0	0	0	0	0	0	0.13325	0	0	0	0	0	0	0	0.0161223	0	0	0	0	0	0.0977843	0	0	0	0.0198951
LOC109500764	0	0	0	0	0	0	0.0255251	0	0	0	0	0	0.62891	0.0815744	0.00591711	0	4.4284	0	0	0	0	0	0.415056	0.015406	0	0.141895	0.073287	0	0	0.0417729	0	0	0	125.368	0.0609014	0	0	0	0	0.00333746	0	0.0569539	0	0.0162969
LOC101083316	22.4513	198.558	208.048	186.755	223.861	125.779	906.443	247.482	531.24	241.104	137.612	317.8	28.0868	30.3282	56.8717	969.28	109.059	34.802	120.874	212.789	240.875	72.7924	22.6722	46.2832	242.198	778.921	1046.35	308.367	177.402	330.29	190.56	153.951	188.633	58.6899	56.0269	411.44	937.638	148.607	228.069	287.563	434.874	51.4172	251.312	180.793
LOC101083056	0	0	0	0	0	0	0	0	0	0	0	0	0	0	0	0	0	0	0	0	0	0	0	0	0	0.105919	0	0	0	0	0	0	0	0	0.0738729	0	0	0	0	0.00809663	0	0	0	0
LOC101090164	0	0	0	0	0	0	0	0	0	0	0	0	0	0.00945393	0	0	0.0175962	0	0	0	0	0	0	0	0	0.132823	0.0891815	0	0	0	0	0	0	0	0	0	0	0	0	0.00812258	1.67067	0	0	0.0198313
LOC123384370	0	0	0	0	0	0	0	0	0	0	0	0	0	0	0	0	0	0	0	0	0	0	0	0	0	0.0485901	0	0	0	0	0	0	0	0	0	0	0	0	0	0.00404831	0.520415	0	0	0
LOC101080302	0	0	0	0	0	0	0	0	0	0.471332	0	0	0	0	0	0	0	0	0	0	0	0	0	0	0	0.0657788	0	0.0293087	0	0.0503485	0	0	0	0.0159176	0.0734039	0	0	0	0	0.00804522	0	0	0	0
LOC101101231	0	0	0	0	0	0	0	0	0	0	0	0	0	0	0	0	0	0	0	0.00887579	0	0	0.0210447	0	0	0.0664113	0	0.00591811	0	0.330412	0	0	0	0	0	0	0	0	0	0.0446742	0	0	0	0.158651
LOC101100977	0	0	0	0	0.112066	0	0	0	0	0	0	0	0	0	0	0	0	0	0	0.00890433	0.101764	0.345821	0.0351873	0	0	0.0266499	0	0	0	1.45339	0	0	0	0	0.18587	0	0	0	0	0.0651896	0	0	0	0.228794
LOC101099980	0	0	0	0	0	0	0	0	0	0	0	0	0	0	0	0	0.00737463	0	0	0	0	0	0	0	0	0.074222	0.0498352	0	0	0.340867	0	0	0	0	0.952497	0	0	0	0.192867	0.208791	0	0	0	0
LOC101098527	0	0	0	0	0	0	0	0	0	0	0	0	0	0	0	0	0.0172569	0	0	0	0	0	0	0	0	0.104209	0	0	0	0.0398821	0	0	0	0	0.755881	0	0	0	0.0338487	0.0796598	0	0	0	0
LOC101093328	0	0	0	0	0	0	0	0	0.0943842	0	0	0	0	0	0	0	0	0	0	0	0	0	0	0	0	0.106944	0	0	0	0.153482	0	0	0	0	0	0	0	0	0	0	0	0.00498237	0	0
LOC101093577	0	0	0	0	0	0	0	0	0	0	0	0	0	0	0	0	0	0	0	0	0	0	0	0	0	0.0393424	0	0	0	0	0	0	0	0	0	0	0	0	0	0.00801976	0	0	0	0
LOC101093829	0	0	0	0	0	0	0	0	0	0	0	0	0	0	0	0	0	0	0	0	0	0	0	0	0	0.0261455	0	0	0	0	0	0	0	0	0.0729408	0	0	0	0	0	0	0	0	0
LOC101091078	0	0	0	0	0	0	0	0	0	0	0	0	0	0	0	0	0.0041633	0	0	0	0	0	0	0	0	0.113134	0	0	0	0	0	0	0	0	0	0	0	0	0	0	0	0	0	0
LOC101094321	0	0.0106004	0	0	0	0	0	0	0	0	0	0	0	0	0	0	0	0	0	0	0.00667691	0	0	0	0	0.0262282	0.0440263	0	0	0	0	0	0	0	0	0	0	0	0	0.0200494	0	0	0	0.0195803
LOC101091338	0	0	0	0	0	0	0	0	0	0	0	0	0	0	0	0	0.0088835	0	0	0	0	0	0	0	0	0.0536448	0	0	0	0	0	0	0	0	0	0	0	0	0	0.00820144	0	0	0	0
LOC101091589	0	0	0	0	0	0	0	0	0.0158328	0	0	0	0	0	0	0	0	0	0	0	0	0	0	0	0	0.0941833	0.0451699	0	0	0	0	0	0	0	0	0	0	0	0	0.0164561	0	0	0	0
LOC101091839	0	0	0	0	0	0	0	0	0	0	0.0922356	0	0	0	0	0	0	0	0	0	0	0	0	0	0	0.278036	0	0	0	0.10134	0	0	0	0	0.147746	0	0	0	0	0	0	0	0	0
LOC101094567	0	0	0.0464421	0	0.219199	0	0	0	0	0	0	0	0	0	0	0	0	0	0	0	0	0.0302874	0	0	0	0.0912215	0	0	0	0.0498735	0	0	0.112466	0	0.0727114	0	0	0	0.0846573	0.00796932	0	0	0	0
LOC101094819	0	0.0954972	0	0	0.168914	0	0	0	0	0	0	0	0	0	0	0	0.00665186	0	0	0	0	0.00777979	0	0	0	0.100422	0	0	0	0.0960811	0	0.0596045	0.173332	0	0.112062	0	0	0	0.19571	0.153529	0	0	0	0.0299873
GCSAML	8.10522	0	0	0.11484	10.5467	13.4534	0.176967	0	0	0	0.150625	0	0.64236	0	0.0644656	1.67929	1.38563	0.0729294	0.184787	0.130034	0.368774	0.0251253	0.0228381	0	0	16.6591	11.0331	0	0	0.37236	4.4374	5.67865	9.46973	1.53691	0.361913	0	0.195549	0	0.596945	0.416498	0.0849861	0.783684	0	0.540723
LOC101095546	0	0	0	0	0	0	0	0	0	0	0	0	0	0	0	0	0	0	0	0	0	0	0	0	0	0.0912454	0.0765816	0	0	0.0436508	0	0	0	0	0.668211	0	0	0	0.0740946	0.156937	0	0	0	0.0596031
LOC101095792	0	0	0	0	0	0	0	0	0	0	0	0	0	0	0	0	0.00651504	0	0	0	0	0	0	0	0	0.118027	0	0	0	0	0	0	0	0	0.0548787	0	0	0	0	0.00400988	0	0	0	0
LOC101096031	0	0	0	0	0	0	0	0	0	0	0	0	0	0	0	0	0.00216483	0	0	0	0	0	0	0	0	0.0784365	0	0	0	0.100062	0	0	0	0	0.164117	0	0	0	0	0.00799446	0	0	0	0
LOC101096283	0.0120562	0	0	0	0	0	0	0	0	0	0	0	0	0.0223645	0.00567783	0	0	0	0	0	0	0	0.0221262	0	0	0.47655	0.0703234	0	0	0.0400837	0	0	0	0.0126724	0	0	0	0	0	0.006405	0	0	0	0
LOC123385095	17.1579	0.369455	0	0	0.163372	1.7752	0.227134	0	0	0	0.135327	0	0.559631	0.857235	0.0315918	0.532494	0.0772032	0	0	0.0519234	0	0.767501	0.123112	0	0	76.7396	59.3447	0	0.227667	0	0	0.230595	0.335289	0.423059	0	0	1.46407	0	0	0.0237585	0	0.26064	0	0
LOC109492731	9.75056	0.140745	0	0	0.746842	1.35253	0.138443	0	0.661813	0	0.206212	0.374018	0.373088	0.6742	0.128373	0.40571	0.00980358	0.0499219	0	0.059341	0	0.378376	2.43878	0	0	218.222	182.848	0.0461613	0.346922	0	0.441819	0.175691	0.255458	0	0	0	0.981627	0	0	0	0	0.126873	0	0
LOC101096535	0	0	0	0	0	0	0	0	0	0	0	0	0	0	0	0	0	0	0	0	0	0	0	0	0	0.1066	0	0	0	0	0	0	0	0	0.074348	0	0	0	0	0	0	0	0	0
LOC101096784	0	0	0	0	0	0	0	0	0	0	0	0	0	0	0.0069552	0	0	0	0	0	0	0	0	0	0	0.0513197	0.0430722	0	0	0	0	0	0	0	0	0	0	0	0	0	0	0	0	0
LOC101097040	0.00733128	0	0	0	0	0	0	0	0	0	0	0	0	0	0	0	0	0	0.326596	0	0	0	0	0	0	0.229282	0.0855266	0	0	0	0	0	0	0.015412	0	0	0	0	0	0	0	0	0	0
NLRP3	0.0161232	0.0443998	0.307823	0.0805963	0.230693	0.0564716	0.0436738	0	0.00549415	0	0.0162631	0.191732	0.325764	0.0182777	0.0597964	0.0533278	0.276407	0.0118114	0.169589	0.683277	0.0760682	0.00282584	0.0197268	0.00164749	0.0550073	2.80252	1.87309	3.04922	0.212042	0.25686	0.104533	0.13856	0.241763	0.281042	0.270277	0.39552	0.156593	0.357794	0.106157	0.188801	0	0.240359	0.0274281	0.129835
ZNF496	0.00183505	9.47249	4.48019	6.5499	4.91941	2.56449	6.80367	4.23698	2.32898	9.20022	2.52936	3.57376	13.384	2.46795	0.922839	4.73298	1.70588	1.92617	4.47459	4.3237	9.56281	1.53957	7.05021	0.0399393	4.09028	0.334511	0.223889	1.40049	3.35534	5.97907	2.21391	2.14869	2.29302	1.4138	4.66684	2.60727	1.29084	3.5598	2.48636	4.5669	1.25951	2.80285	7.65132	2.23066
LOC101097294	0	0	0	0	0	0	0	0	0	0	0	0	0	0	0	0	0	0	0	0	0.0133538	0	0	0	0	0.0131141	0.0880527	0	0	0	0	0	0	0	0	0	0	0	0	0	0	0	0	0
LOC101097538	2.83269	0.580279	0.0756394	0.0422748	0.290066	0	0.285395	0	0.0249757	0.126735	0.0739302	0.36875	0.143312	0.020772	0.0230118	1.69695	0.0316326	0	0.0453489	0.311141	1.26837	0.938269	0	0	0.541789	0.684487	0.0178135	0.00591053	0.0310942	0.0761513	0	0.031494	0.0457928	0.0513601	0.222044	0.267268	3.11936	0.338852	0.0344699	0.191447	0.333705	0.133491	0	0.0396119
LOC101097782	1.03691	0.260919	0.0507014	0.0701677	0.14529	0	0.0641633	0	0	0	0.0141588	0.115562	0.0988069	0.0961992	0.00991602	0.473561	0.0350025	0.00342769	0	0.198967	0.658633	0.801238	0.00214679	0	0.0638529	0.193078	0.0272924	0.000452783	0.02382	0.10695	0	0.0120632	0.0350801	0.146314	0.20979	0.223357	0.628042	0.103833	0.0264061	0.118074	0.0319549	0.0454498	0	0.00910354
LOC102901766	0.02621	46.6569	17.2719	37.1165	2.41287	2.42354	27.7313	3.06643	1.17358	48.6605	1.33245	30.0797	32.2987	11.4987	0.170341	5.67994	1.49769	0.403215	17.5725	16.9373	99.4738	845.423	18.1971	0.366374	41.0976	1.40033	1.14662	3.33122	38.088	10.5746	2.09014	1.09469	1.41485	2.9268	12.0058	43.353	11.6354	38.3878	9.96226	13.5387	5.5848	2.38554	114.808	8.70992
RNF187	0.0325427	44.0237	124.013	228.657	76.4716	66.1851	66.1706	54.4751	24.4061	29.7108	59.1591	166.733	284.963	56.6021	18.8356	116.118	51.491	17.5402	205.226	55.122	243.197	40.2086	59.7841	7.55167	174.921	31.9357	24.4158	58.2742	149.476	242.563	69.7051	62.2121	50.2609	54.8622	216.697	95.9267	112.84	159.508	214.821	201.614	51.2284	63.8076	281.839	157.488
LOC101098354	1.25157	9.87244	26.298	9.87094	0.269479	0.137796	5.56735	0.504693	2.21705	9.75767	0.558049	28.2191	17.8736	3.55095	0.0738228	1.4639	0.908186	0.637662	3.61478	7.17934	9.79474	4.76853	3.37774	0.940686	14.8484	9.09024	7.85257	0.568212	50.1995	34.5379	0.239129	0.247236	0.110611	0.829641	61.6523	2.67034	2.32803	15.9195	15.1847	22.4878	1.05795	0.393498	85.8338	15.7069
LOC101098601	0.292479	2.62076	78.972	28.0289	6.00907	0.219478	1.58494	2.26154	12.7678	0.97517	2.55988	12.2523	43.7534	8.05698	0.509066	1.9586	3.103	3.99375	7.415	2.02578	13.4979	35.8559	7.78706	1.95932	4.64986	8.70662	6.23656	1.37074	52.9295	61.818	1.52351	0.424083	0	1.35848	107.945	5.42173	1.26165	5.47538	9.71412	34.9437	0.128386	1.02552	7.07555	12.3976
LOC101101285	0	0	0.0266742	0	0	0	0	0	0	0	0	0	0	0.0239735	0.00405755	0	0.594943	0.0378697	0.159923	0	0.0724049	0.0695825	0	0	0	0.112271	0.0502552	0	0	23.8326	0	0	0	0	72.7076	0	0	0	8.3875	12.6308	0	0.000697412	0	5.21326
TRIM17	0	0.428436	1.10037	0.181866	0.0151562	0.103334	1.57334	0	0.0254476	0.781948	0.00836965	0.0986731	0.24012	0.026509	0.150774	0.0219557	0.0354134	0.116507	0.37478	0.026895	0.0752372	0.0274571	0	0.0720685	0.150981	0.0336395	0.0403334	0.00535306	0.165448	9.9706	0.053797	0.167576	0.0311053	0.0225312	13.9162	0.4016	0.144879	0.0920677	18.622	15.6283	0	0.0208217	0	9.86269
LOC102899256	0	5.92809	4.39591	7.96062	4.9453	13.6894	4.61117	1.43918	0.249722	4.27668	3.88078	13.7982	8.23128	2.95172	1.14803	1.77751	0.374851	1.7075	15.0764	0.712008	1.8593	1.77078	1.95204	0.580337	14.7235	0.548219	0.385904	1.79458	6.14022	7.90169	3.10153	5.48442	6.94425	1.455	12.6301	5.14216	3.01229	12.3099	8.24289	7.01333	4.17072	1.92298	8.31113	5.16201
TRIM11	0.244323	15.5534	30.6855	53.1457	21.5723	31.0001	20.1686	19.756	10.8226	9.10687	12.4852	30.2366	57.817	27.2192	6.42084	28.4584	13.3869	4.45152	39.4333	8.81904	41.6503	8.57515	29.5373	1.40611	25.8537	11.816	8.38704	36.3387	26.9928	24.222	28.0722	27.0809	22.1144	20.4476	28.1363	24.0081	26.2099	23.5785	16.7798	30.334	18.0854	19.9517	21.328	17.7983
OBSCN	0	0.12894	0.301693	0.415698	0.292273	0.0977165	0.0584019	0.0181295	0.0134416	0.0886262	2.87443	0.0998872	0.233319	0.00942636	0.0201551	0.128743	0.667741	3.92671	0.105519	0.0358359	0.0892956	0.000485988	0.0214102	0.000188054	0.0714393	0.0317587	0.0179513	0.0185435	0.15506	0.116275	0.870689	0.125105	0.269178	0.0377326	0.154019	0.142558	0.0302794	0.0804902	0.0358907	0.15039	0.0499962	0.230681	0.0717213	0.0540963
IBA57	2.16355	2.82957	6.48576	4.86252	5.01109	2.62098	2.22871	2.063	1.03308	1.75032	8.15809	4.97878	11.5136	4.45694	3.98466	3.88982	4.01603	4.9263	1.32186	2.33532	8.93509	3.18383	2.6326	0.187117	3.1932	3.7002	3.7682	4.04589	3.67721	13.6509	3.96852	2.99883	2.55519	6.47131	14.1363	3.34554	5.0181	4.51524	5.19601	11.8734	2.73285	4.65145	3.68632	5.45977
GJC2	0	0.121091	6.06954	5.29799	0.740722	0.781483	0.114148	0.0111427	0.0349631	0.240775	0.0739238	4.46485	0.137567	0.16163	0.0546484	0.824164	0.225626	0.0250547	0.217656	8.29923	0.275534	0	0.00448341	0	3.98389	0.242999	0.227993	0.0567363	0.310915	0.302549	0.142547	0.239334	0.311364	0.247791	0.497337	34.3629	0.0959721	3.17138	0.151655	0.201814	0.0667354	0.113507	0.224413	0.0855543
GUK1	18.0032	65.9858	220.593	127.847	78.0168	87.0215	70.7337	32.9702	32.0379	64.0482	69.2662	271.201	373.389	109.68	31.2788	86.9245	79.6336	31.0005	350.719	99.112	103.618	210.042	56.9339	22.7338	247.391	30.8244	21.0288	66.6708	248.972	69.9985	67.1568	53.4491	54.9574	163.61	66.7448	155.141	80.0382	280.953	156.207	93.2941	36.5137	89.2371	81.5513	80.5976
MRPL55	2.72678	30.4688	27.816	42.3558	21.5607	56.9385	39.2179	23.4531	9.65154	19.8783	17.5592	43.2631	75.6166	42.8175	9.52554	31.9558	16.5525	7.94179	36.0441	8.9136	33.2634	95.1855	30.6047	1.58249	36.6811	6.81118	4.24174	39.0731	32.6489	35.5937	26.3896	27.0027	23.5388	22.5586	47.0084	38.5247	42.817	42.9598	73.5636	46.7372	14.916	26.2808	35.7697	44.6766
CA1H1orf35	2.16129	58.8886	113.746	132.379	74.6275	86.9754	67.4193	99.1325	35.0416	48.235	68.0559	98.645	235.947	136.503	25.7446	76.9888	51.1488	48.1947	208.955	15.0799	100.06	102.36	99.5161	1.97096	107.273	42.8351	27.9301	248.039	161.4	98.9696	107.447	83.7224	88.6816	72.2805	76.5006	100.15	79.5613	97.3035	145.441	128.227	60.2152	49.657	98.5095	150.584
ARF1	32.5559	544.359	333.681	652.02	567.426	631.227	550.692	470.669	278.857	462.999	600.587	705.436	1436.55	480.898	113.124	627.627	420.851	237.024	717.436	413.878	440.95	824.798	1047.9	69.0751	599.136	204.648	158.305	574.613	710.439	450.445	563.634	615.17	540.819	614.848	563.443	516.613	423.599	721.905	571.607	542.902	462.536	548.985	470.061	479.692
WNT3A	0	0.814724	0	0	0.0800596	6.37095	0.422962	0.0249899	0.0168027	1.25051	0	0.0601407	1.78259	0.0948578	0	5.47988	0.124534	0	0	0	0.765769	1.06565	0.0603303	0	1.6449	0.0951929	0.0319579	0.00424146	0	0.163941	5.22165	14.5773	10.1049	3.01187	0.451468	0.435897	0.0717464	1.45898	0	0.0989636	0	2.67958	0	0.0426389
WNT9A	0	2.48386	1.24698	2.1028	7.10131	1.25396	3.68216	0.226405	0.295761	1.8441	1.17875	4.63396	12.2545	1.10377	0.263599	7.89548	1.80481	0.932275	2.1902	3.07808	5.53264	0.429518	0.471971	0.173897	7.44481	0.0903502	0.0386045	0.0428187	1.10224	3.73757	3.06494	2.77884	2.52353	2.10585	1.3382	1.60975	1.27774	8.30857	1.22724	2.53483	0.232454	2.22802	5.94463	1.51578
LOC123386700	0	1.48711	0	0	0.328798	0	0.411412	0	0	2.80131	0	0	0.211182	0.0139133	0.0105968	0.357229	0.0647406	0	0	0.117562	0.238857	0	0	0	0	0.0781899	0	0	0	0.299241	0.145884	0	0.168699	0	0.218134	0	0	0	0.126986	0.245057	0	0.0291422	0.689001	0.0364821
LOC123385177	0	0.665434	0.0103907	0.0619448	0.196169	0.0979582	0.340913	0	0	0.974941	0	0	0.31499	0.016602	0.00316116	0.479545	0.0193129	0	0	0.0487086	1.28554	0.126491	0	0	0	0.0583123	0	0	0.068343	0.256643	0.0435187	0.0692217	0.10065	0.0185204	0.227752	0	0.0351598	0	0.0757627	0.187215	0	0.0445539	0.411074	0.0522386
PRSS38	0	0.0783989	0.264424	0	0	0	0.00963962	0	0	0.0984546	0	0	0	0	0	0	0.0109218	0	0.598904	0.00550911	0.0125923	0	0	0	0	0.107174	0	0	0.0241557	1.24628	0	0	0	0	3.17394	0	0.124272	0	5.6502	2.79179	0	0.00307268	0	1.31707
LOC101100277	0.626435	43.456	12.8947	27.3332	17.9056	10.2292	19.3219	8.31125	7.30828	41.366	15.7925	25.1591	37.4148	12.0118	2.02726	17.2868	42.3171	7.1348	26.7753	21.1582	21.1065	55.812	18.2588	2.42114	27.206	4.77652	4.62921	13.4576	26.7464	29.1091	17.6179	16.0414	16.8983	21.3819	45.3622	34.4499	13.8182	28.5075	88.1084	46.4102	32.0866	18.9569	16.0714	40.4924
SNAP47	0.016208	18.1393	14.3554	32.1332	9.21459	9.78552	15.7528	9.33917	1.81432	14.9605	8.23054	29.1057	18.2804	9.32759	3.16334	7.406	7.49243	1.62074	34.1953	7.75995	21.6613	5.9805	13.7831	0.217992	31.996	1.1194	0.753375	7.58793	16.5773	21.8674	5.93064	6.87916	6.60752	8.21621	17.8977	26.0764	5.3964	29.4373	23.1107	20.5877	10.6264	4.29085	17.9134	14.4076
JMJD4	0.0540535	12.3209	11.6774	13.2248	10.5352	6.52017	8.92109	4.37063	2.8596	13.5928	8.99995	12.2512	17.2055	5.81379	3.04595	12.2824	6.39275	3.45223	13.4355	13.408	16.0941	5.6181	8.48123	0.277167	12.9593	3.44396	2.07807	5.00748	15.8384	15.5606	10.3303	11.4401	10.3341	8.10535	12.0762	10.9517	5.73836	14.5441	9.11003	15.7075	15.7562	6.60852	17.1159	11.0972
LOC109492746	0	0	0.0491922	0.0488773	0	0.0494678	0	0.120788	0	0	0	0.23255	0.231972	1.32962	0	0	0.0152387	0	0	0.0707173	0	0	0	0.00649423	0.144555	0.276066	0.123574	0	0	8.18816	0	0	0	0	11.1161	0	0.0277426	0	5.17099	5.52619	0	0.0085744	0	4.88784
LOC109497082	0	0.0149149	0.00232894	0	0	0.0140519	0.00122259	0	0	0	0.00610052	0	0	0	0.00575331	0.0080016	0.000865749	0.00440858	0	0	0.0791879	0.0717595	0	0	0.0164251	0.139117	0.0526539	0	0.0127907	4.70106	0	0	0	0	7.24514	0	0.0197016	0	5.604	4.41727	0	0.000730699	0	1.49676
LOC123384498	0	0	0	0	0	0	0	0	0	0	0	0	0.0264445	0	0	0.0335496	0	0	0	0	0.0224325	0.119468	0	0	0	0.0660896	0	0	0	0.140518	0	0	0	0	8.66571	0	0	0	0.238521	0.709528	0	0.00273692	0	0.260396
LOC109497081	0	0	0.00722416	0	0	0	0	0	0	0	0	0	0	0	0	0.00926128	0	0	0	0	0.0165132	0	0	0	0	0.0162168	0.0408319	0	0	0.438323	0	0	0	0	3.76071	0	0.00611125	0	0.941556	0.741307	0	0	0	0.86031
LOC123384503	0	0	0	0	0.0519671	0	0	0	0	0	0	0	0	0	0.0267976	0	0	0	0	0.0247746	0.0692115	0.239348	0	0	0	0.12358	0.0829761	0	0	0.354717	0	0	0	0	0.206859	0	0	0	0	0.421324	0	0.00460597	0	0.119934
LOC123385181	0	0	0.0274679	0	0	0	0	0	0	0	0	0	0	0	0	0	0.0229743	0	0	0	0	0	0	0	0	0.0077075	0	0	0	10.8993	0	0	0	0	29.34	0	0	0	4.45624	9.54741	0	0	0	1.36943
LOC123385184	0	0.0163479	0.0530425	0.00624745	0.00152189	0	0.00338539	0.000237523	0.000425881	0.0162079	0.00189096	0.0400136	0.00264736	0.00549815	0.00333534	0	0.000334722	0.000610376	0.00695952	0.00219385	0.00138198	7.00949e-05	0	0	0.0277154	0.0325722	0.00273376	0.000322512	0.00848337	0.578662	0	0.00953225	0.0048803	0.00161472	1.00512	0.0124293	0.0324872	0.0416018	0.524001	0.873978	0.331992	0.00313617	0.00425219	0.118373
LOC123385203	0	0.0380881	0.385392	0	0	0.150714	0.0187327	0	0	0	0.0558049	0.93625	0.0144235	0.0716263	0.0260551	0	0.0137029	0	0.0513463	0.0361323	0.0703528	0.000775724	0	0	0.880837	0.500652	0.134462	0.00267688	0.117354	1.99974	0.0896733	0.576487	0.544413	0.06421	1.37437	0.0550208	4.4375	2.14852	4.9176	2.27176	66.5073	0.131738	0.611754	1.03081
LOC123385245	0	0.473323	1.8625	0.675606	0.790695	0.0297291	0.278057	0.145182	0.032539	0.594407	0.192636	0.698788	0.308693	0.0688858	0.118422	0.884332	0.0439591	0.359091	0.898042	0.492441	0.373081	0.040702	0.0817823	0	0.781871	1.49319	0.668386	0.0431222	1.44216	1.10059	0.350821	0.1313	0.286368	0.107061	1.85914	0.709069	0.250091	0	0.790386	0.926668	1.56513	0.0690506	0.227419	0.315837
MGAT1	0.698675	7.54405	6.45986	6.38252	17.6671	12.5177	12.075	18.9173	14.6666	5.46982	9.18915	8.49235	37.9727	11.6625	7.06606	15.6586	11.2175	3.16826	6.93315	20.0962	24.3339	31.6723	24.841	0.386627	7.69185	23.77	17.4639	10.7257	11.8909	20.5956	11.3422	10.2701	8.3091	17.2981	11.7712	7.36764	20.622	7.88316	9.33317	17.9546	24.5264	11.4724	10.6672	13.1872
LOC109499602	0.00155658	0.203608	0.16345	0.0395036	0.16301	0.00848079	0.0445357	0.00354993	0.00318253	0.184369	0.017271	0.0256297	0.0543785	0.0186885	0.0114847	0.0453061	0.0553857	0.0231862	0.0423762	0.0664174	0.116239	0.0129205	0.00761794	0.000636214	0.00354037	0.0833891	0.042371	0.0102428	0.186882	1.83678	0.0420498	0.0481573	0.0291756	0.0185429	3.66123	0.0227044	0.0407675	0.155441	2.48166	1.9044	0.290569	0.01407	0.0317758	0.426011
ZFP62	0.108346	9.67857	5.13758	8.76417	6.63596	2.56824	5.08838	2.21509	1.31735	10.9796	5.94407	4.33701	9.61777	2.17839	1.08103	8.76142	5.44245	6.36159	3.45965	14.2627	12.4088	5.01776	2.52263	0.376587	5.21721	3.8918	2.26357	2.02419	10.785	8.0375	9.10147	8.44848	8.56047	3.95875	9.578	5.25859	4.81868	3.91889	6.58642	8.43444	23.1073	6.63747	8.97007	6.46159
BTNL9	0	0.00879916	0.0552338	0.0516038	1.7626	0.0174091	0.0097372	0	0.00871065	0.0331504	4.17543	0.0321517	0.132452	0.175186	2.13735	0.0676385	2.09093	1.28353	0.0158161	0.645912	0.533522	0.161646	0.00244342	0.002612	0.159886	0.0522789	0.00155318	0.0189647	0.0704895	0.399269	16.3306	0.664531	0.289472	0.323266	0.20651	0.0254219	2.34252	0.0709077	0.0345629	0.179374	0.82924	1.60569	0.0108714	0.138497
LOC123385247	0	0	0.151272	0.0501011	1.18996	0.253532	0.0220585	0	0	0.225295	2.20137	0.893897	0.35667	0.718384	1.0815	0.172381	0.862239	1.38403	0	2.0659	1.66647	0.0876909	0	0	1.03722	0.235815	0.0950007	0.138694	0.552759	0.703943	10.8586	0.391906	0.366325	0.211137	0.157891	0	2.36029	1.4457	0.21447	1.10176	0.593226	1.00196	0.443302	0.133794
LOC101093739	0	0	0	0	0	0	0	0	0	0	0	0	0	0.00927555	0.0247259	0	0	0	0	0.108854	0.0464444	0	0	0	0	0.130316	0	0	0	0	0.534906	0	0	0	0.0727114	0	0	0	0	0.0159386	0	0.0364277	0	0.0194571
LOC101093987	0.060192	0	0.0465886	0	0	0	0	0	0	0	0	0	0	0	0	0	0.0346373	0.0220475	0	0.0087358	0.0266234	0	0	0	0	0.0784365	0	0	0	0.150093	0.0975625	0	0	0	0	0	0	0	0	0.0159889	0	0	0	0
LOC101082715	0	0	0	0	0	0	0	0	0	0	0	0	0	0	0	0	0	0.0222582	0	0.00881926	0	0	0	0	0	0.118779	0	0	0.0773393	0.0505089	0	0	0	0	0	0	0	0	0	0.00807084	0	0.0049189	0	0
LOC101082972	0	0	0	0	0	0	0	0	0	0	0	0	0	0	0.0142185	0	0	0.0221173	0	0.00876344	0.0133538	0	0	0	0	0.0786847	0	0	0	0	0	0	0	0	0	0	0	0	0	0.0400988	0	0	0	0
LOC109492762	0.265683	0	0	0	0	0	0.110404	0	0	0	0	0	0.113343	0.834483	0	0.575184	0.250177	0	0	0.0315484	0.240369	0.475473	0	0.0444238	0	2.80118	1.69061	0.042071	0	0	0	0	0	0.533137	0	0	0.83026	0	0	0	2.22685	0.0821145	1.10938	0.0469927
TRNAP-UGG_1	0	0	0	0.458564	0	0	0	0	2.03188	0	0	0	0.310906	0.0614505	0.163809	0	0	0.364014	0	0.490388	0.703301	0	0	0	0	8.54713	6.37648	0.134637	0.505928	0	0.644319	2.04973	0	0.104459	0.481713	0	0.26028	0	0	0.369577	0	0.353956	0	0
LOC109499615	0.0556835	0.306681	0.632119	0.549563	0.960594	0.86681	0.248246	0.204598	0.145473	0.160473	0.964196	0.679151	3.82282	0.442826	2.41334	3.46248	1.7902	0.376195	0.539761	1.26848	1.52291	1.51258	0.39742	0.0796575	0.428077	9.52167	5.07051	1.01902	0.834682	0.925668	1.09309	0.749708	0.846558	1.31691	0.522274	0.492245	3.68645	0	0.366629	0.532487	2.45074	1.0953	7.15184	0.381194
TRNAT-UGU	0.0653455	0.809764	0.303464	1.13071	1.07422	0.915494	0.298696	0.22354	0.300607	0	0.296607	0	6.28627	0.848523	6.83191	8.55882	3.29964	1.22069	2.54715	2.75976	1.82088	0.131937	0.359778	0	0	21.1177	17.1522	0.98646	1.49699	4.5624	4.1307	2.02165	3.30696	2.67873	1.18779	0	5.51936	0	0	0.989397	4.01646	1.50751	23.511	0.762827
TRIM7	0.0782434	1.61708	0.884018	1.0722	2.79983	4.44179	1.05696	1.75507	1.10519	0.784516	7.67746	1.45692	5.46386	1.30118	1.69195	5.73059	2.50443	8.48647	1.5001	3.1042	3.33784	1.68091	2.86664	0.383439	1.57478	7.41702	5.20334	2.47233	1.7243	1.74023	5.36223	4.24027	5.03155	5.03763	0.324536	1.02463	5.36067	1.5557	0.306729	1.05423	4.45419	5.83842	5.31837	0.569594
TRNAA-UGC	0	0	0	0	0	0	0	0	0	0	0	0	0	0.122901	0.327619	0	0	0.582422	0	0	0.175825	0	0	0	0	0.345339	0	0	0	0.991236	0	0	0	0	1.92685	0	0	0	0	0.316781	0	0.2896	0	0.257807
TRNAK-CUU	0	4.85858	41.2711	0.904564	8.59379	3.66197	7.56697	0.67062	74.1497	22.3721	1.18643	0	1.22659	0	5.07777	15.5615	0.0282021	15.2228	2.91103	2.27609	5.89617	0.527747	0	0.480751	0	26.2268	39.45	0.455289	2.99398	29.9815	2.54197	2.02165	2.93952	0.618168	72.2173	0	3.594	0	1.10634	14.0598	2.67764	1.14253	14.0065	0.254276
TRNAV-AAC	0	0	0	0	0	0	0	0	0.200405	0	0	0	0	0	0	0	0.0564042	0	0	0	0	0	0	0	0	0	0	0	0	0.325886	0	0	0	0	2.85068	0	0	0	0	0	0	0	0	0
TRNAK-CUU_1	0	0	1.82079	0	0	0	0.796523	0	7.01417	0	0	0	0	0.303044	0	4.66844	0.0564042	0.574444	0	0.455219	0.433542	0	0	0	0	1.02182	1.14348	0.113822	0	0.325886	0	0	0	0	2.37557	0	0	0	1.10634	0.989397	0	0.031737	0	0
TRNAV-CAC	0	0	0.606928	0	2.8646	0	0	0	0.400809	0	0	2.15188	0.306647	0	0.0923231	0	0	0.143611	0	0.73973	0.693667	0	0	0	0	0.85152	0	0	0	1.95532	0	0	0	0	2.85068	0	0	0	0	1.09354	0	0.126948	0	0.635689
TRIM41	0.00639819	3.91859	4.17527	4.99562	3.76898	3.15633	3.03224	1.19876	0.755458	3.98086	2.54339	4.82782	7.87892	2.53958	1.20697	4.14176	2.11669	1.15114	4.97841	4.90034	7.01564	0.668774	2.37664	0.155926	4.85099	1.23139	0.813876	1.9006	5.43832	5.73311	3.43065	3.8257	3.82466	2.13614	9.21275	5.03512	2.9143	4.42745	7.27032	7.58322	5.67966	2.41815	6.20721	3.5854
RACK1	383.078	2544.81	402.361	682.028	1497.27	2707.55	2771.02	2634.9	1598.29	2139.52	870.919	562.674	5356.01	1884.13	599.327	1306.44	1553.16	1098.55	536.185	2107.62	3340.32	651.165	2172.62	167.706	547.462	905.388	774.861	2900.1	801.553	844.171	1591.33	2264.48	1916.02	1506.62	735.973	537.607	1771.36	552.837	520.983	1074.83	1537.54	2512.37	2874.45	932.31
LOC111556989	0.120765	49.3853	56.9245	20.8966	66.8376	19.4571	53.914	44.3076	43.5183	58.2602	14.8003	15.9076	90.1077	63.3983	17.7021	67.5841	41.9047	18.4458	34.9692	106.45	112.693	1.46299	135.89	1.66589	35.8451	120.938	95.0969	192.755	25.3604	79.1985	31.7103	52.3071	44.8184	69.5935	94.8304	15.8534	47.2062	43.2139	18.9129	95.1304	70.5169	71.8795	82.2789	22.0866
LOC111557009	0.420902	18.2554	39.7449	10.6818	39.2092	4.91405	18.3845	18.7182	24.9563	20.7421	11.463	21.9461	34.2363	19.2593	14.1234	41.3466	10.2938	10.6378	22.6568	30.1766	25.5981	2.19539	41.1337	0.129025	10.0519	94.1556	58.9228	43.1336	20.8918	67.1708	26.6066	10.309	22.0896	20.6829	109.15	21.7666	36.3779	17.5132	11.2831	31.9203	43.1179	12.7083	30.0729	9.07633
TRIM52	0.0123793	4.21428	5.68601	4.80546	7.59494	0.890895	2.04208	0.810408	0.293336	4.53449	1.85003	4.30351	4.80979	0.937068	1.03092	4.21066	1.77604	0.799757	3.85772	5.83012	4.3186	0.461986	1.2128	0.0680915	5.04898	1.86318	0.961526	0.977765	5.36958	9.86247	3.59352	1.6819	2.15788	1.72163	4.78397	3.94564	3.35612	3.16826	2.2259	4.49887	7.32179	2.36399	7.82086	1.76073
LOC123385269	0.103183	11.8029	13.3556	10.0442	17.3683	2.56686	7.8649	1.8916	0.754602	10.602	3.95097	6.62155	11.3292	2.8711	3.31746	13.2941	4.26537	1.89844	7.08645	16.5481	10.1107	1.19658	2.64022	2.25547	9.0444	3.42351	1.36577	2.64333	13.2029	23.4037	6.72836	6.85518	8.62862	5.27891	11.2822	5.96751	6.50137	7.70592	4.96091	9.63202	19.7582	8.37544	18.4914	4.98542
LOC101094232	0.000475524	2.75558	4.20043	4.2795	2.06896	0.817775	0.937562	0.955697	0.578969	2.0332	2.48759	3.27576	7.40968	0.399265	1.57648	3.27057	3.43368	0.644807	2.02702	4.36174	4.23224	1.15538	2.13231	0.137315	3.73422	1.93054	0.685457	0.785809	4.16322	3.16002	1.38216	1.35992	1.4673	3.43982	0.746375	4.31153	1.84711	3.1796	0.807108	2.01839	4.6083	2.00173	5.69333	1.23039
FELCATV1R2	0	0.130925	2.74764	0.329069	1.79474	0	0.201226	0	0.0324021	0.164418	0.191825	0.695847	0	0.0587965	0.0223907	0.377405	0.00911961	0.243805	0.352999	0.0828014	0.287395	0	0	0	0.432545	0.0688383	0.0924407	0	0.161359	0.105381	0.154123	0.163434	0.118818	0.0166579	0.460908	0.37826	0.0415064	0	0.178877	0.0926136	0	0.0218082	0.242638	0.0411121
LOC111556195	0	0.675717	3.37952	0.698912	1.76329	0.0440447	0.337463	0.0230291	0	0.087372	0.3789	0.509881	0.0823257	0.0349659	0.0544893	1.2745	0.0296349	0.14351	0.209926	0.268483	0.256065	0.00792421	0	0.0148581	0.702794	0.0498972	0.0706807	0.00322073	0.663147	0.506949	0.733247	0.49985	0.764644	0.0297191	1.45077	1.17295	0.218186	1.03079	0.267843	0.427506	0.662042	0.0394504	0.68025	0.145909
LOC102901511	0	0.707937	3.04112	1.05095	0.951499	0.0421248	0.264572	0.0411432	0.0368851	0.245656	0.354844	2.07313	0.447987	0.0488041	0.0838997	0.63548	0.0522312	0.160244	0.552527	0.67993	0.686733	0.557379	0.0775995	0.012443	2.17729	0.0450584	0	0.00130933	0.697425	0.442354	0.394755	0.156976	0.295874	0.072295	1.03842	1.07649	0.147653	0.988347	0.200444	0.387265	0.323418	0.115183	0.644486	0.191588
LOC102901611	0	0.0199908	0.104883	0	0	0.022601	0	0.0110371	0.0296846	0	0	0	0.00757026	0.0591022	0.0136752	0.0384169	0.10165	0.0070907	0.0359326	0.0252857	0.0214059	0.00325715	0.0444095	0.00593419	0	0.0924952	0	0.0018733	0.123188	41.7224	0.0627541	0	0	0.00763041	64.8685	0	0.304203	0	70.6848	44.7448	0	0.001567	0.0493974	37.1996
FLT4	0.00210385	5.76169	1.02222	0.771765	11.615	2.19589	5.02637	2.83474	0.728291	4.16622	3.63358	1.73637	4.87961	2.64786	3.72425	18.4812	2.13332	0.805097	0.550622	1.91995	4.30926	0.300533	13.5931	0.0449834	0.925922	0.0527746	0.00920381	0.996199	1.51218	6.6258	7.47565	2.53846	2.00223	3.11141	2.00578	1.36522	1.86379	1.05046	2.78946	3.88677	0.366388	2.24579	6.57504	3.23883
SCGB3A1	0	0.450383	0.42196	0	0.0995789	0.381892	0.166132	0	0	0	0	0	0.170554	0.0589925	0.0770239	232.932	38.4536	0	0	0.0316485	0.120566	0	0	0.300813	0	0.449927	0.635992	0.0527557	0	1.08753	0	0.21083	0	1.40393	4.22806	0	0	0	0.615338	2.59217	0	206.315	0	0.68945
CNOT6	0.0351605	29.5847	6.68652	14.1733	7.87632	10.7842	13.7994	6.88965	1.60723	35.268	6.35349	7.71717	18.6118	5.82838	0.895292	10.0101	4.4125	1.51957	6.24577	20.2942	8.05059	1.13923	15.1447	0.230223	6.80154	4.33207	2.43186	8.99338	34.5634	12.3959	8.11081	14.3561	15.791	5.63122	21.9816	8.36068	5.40435	6.08015	13.8881	8.6903	56.2329	9.30175	12.3195	8.53164
GFPT2	0	15.1782	11.5712	5.36274	30.272	6.20548	13.4406	91.483	56.334	14.1074	10.9082	19.0831	17.6585	66.066	0.415979	9.43325	20.3546	2.66347	15.0793	19.8788	16.8884	52.0509	29.8916	0.109256	13.7192	0.095917	0.0169479	1.96816	4.95026	23.1489	76.3366	23.6113	20.7309	2.4646	5.33301	5.46319	6.33127	13.0674	12.7354	12.223	1.89171	7.18685	27.8277	10.4004
MAPK9	0.00973569	11.5853	24.9592	38.5365	8.05568	3.88354	5.32543	8.84612	4.49859	9.93641	8.02064	23.6446	14.7581	4.74651	3.16652	7.78943	7.70983	5.49707	31.6939	13.1422	8.39488	1.15376	10.1026	0.569527	36.0993	1.50477	0.960667	4.15129	9.90023	14.7925	7.27727	5.00749	6.31383	12.6206	7.12189	31.2219	3.88848	33.915	6.9527	8.93544	12.7881	6.49569	6.72001	8.27187
LOC123385308	0	0	1.34524	2.69035	0	0.0712788	0.0124032	0	0	0	0.0369493	0.469118	0.0955002	0.00188756	0	0	0	0	0.657279	0.0177213	0.0324047	0.00205448	0	0	1.95794	0.0424307	0.106835	0	0.248647	0.659697	0.0593741	0	0.0915465	0.0609641	1.86438	1.67579	0.159899	3.28546	0.72356	0.729784	0	0.0197679	0	0.221732
RASGEF1C	0	0.688826	13.8285	50.0699	1.61436	1.8593	0.290787	0.0190154	0	0.115339	1.46339	7.10845	0.949928	0.0365195	0.0248693	0.0330935	1.47059	0.223965	23.0654	3.37215	0.792904	0.0322667	0.00255038	0.0102238	43.0773	0.084507	0	0.00215162	1.99148	1.50389	0.869437	0.408434	0.541776	0.333766	2.5125	24.7824	0.414911	51.7851	3.68602	2.48133	0.227774	0.641631	1.12055	1.39333
LOC111556762	0	0	5.64272	3.73773	0	0	0.274275	0	0	0	0	0	0	0	0.127162	0	0	0.593411	0	0.235125	0.0597142	0	0	0	0	0	0	0	0	0.224431	0	0	0	0.283813	0.981604	0	0	0	0	1.04	0	0	0	0
RNF130	2.95674	41.9628	74.5252	119.426	28.3401	14.5506	23.2226	16.9475	11.4298	40.2186	16.1319	113.571	44.7812	12.483	10.6333	30.483	25.0469	7.4692	76.8078	55.931	31.4817	9.60281	19.452	1.04963	118.071	16.1742	10.0428	12.8613	38.6144	27.9725	19.325	9.95333	12.7418	7.02399	36.0535	79.9306	31.8829	119.757	32.0254	30.2912	101.26	17.158	49.1722	26.8437
TBC1D9B	0.017735	52.7058	44.5368	72.9737	61.3925	46.0529	40.9194	45.8173	24.6888	49.4336	28.582	68.2503	79.0916	22.8784	15.7493	47.983	28.9547	13.9124	50.5545	40.7299	36.8144	3.66237	78.241	1.55576	63.461	6.61989	4.20689	11.5183	52.6595	56.9301	46.6497	32.9172	33.434	25.6588	34.9054	56.1991	26.441	65.3478	32.975	44.2433	44.7136	27.2669	41.5366	30.8883
MRNIP	0.0250813	21.4014	12.8375	15.6568	17.4393	9.72179	18.8804	4.39625	3.52735	22.3597	11.6881	17.8759	31.2538	10.0327	7.70058	19.5968	8.97727	7.08312	19.6896	19.1122	49.5513	20.1978	2.51525	0.821574	17.3828	5.92817	4.91146	3.27486	16.1112	32.9505	15.8024	14.226	15.4263	8.27616	45.1691	11.5666	12.9243	16.2205	32.6217	43.9349	15.6854	10.144	55.2693	28.2719
SQSTM1	178.648	48.2351	122.118	133.337	106.637	170.28	52.51	196.988	207.313	41.6171	155.088	138.968	731.445	457.569	126.2	144.41	379.262	285.589	189.074	197.573	187.232	427.321	273.122	48.0388	144.647	62.1005	44.3095	295.317	147.449	233.609	162.214	99.6972	92.7353	176.769	57.7375	125.38	122.71	159.537	50.3943	101.902	90.5602	179.836	308.359	67.7879
MGAT4B	0.0261322	29.5564	29.1512	57.6641	63.0843	82.5682	39.4985	56.7718	42.5028	24.5698	42.6028	56.3665	215.179	68.8899	30.0343	83.5072	72.1414	10.2479	51.762	43.1235	70.2018	11.386	133.966	25.1886	44.1986	6.80777	4.30612	21.9687	39.1665	48.4794	64.4984	47.7128	45.9685	279.94	7.01821	35.6954	43.486	57.7914	11.5402	26.3916	9.16883	46.181	78.0186	15.8107
LTC4S	0.491836	0.330444	2.12585	1.90717	16.0246	4.48308	0.442417	0.111492	0.0227167	0.0461086	0.941404	3.13443	2.70431	0.250764	0.11721	3.06929	1.05239	0.250695	2.98629	1.80281	1.08706	0.16339	0.134582	1.35693	2.12276	0.266404	0.298121	0.771982	3.35986	11.4589	3.06872	4.20514	5.98106	3.90417	12.8285	4.20773	1.69942	4.01896	10.9356	10.3891	0.42493	5.09912	0.861893	11.535
MAML1	0.0574429	67.0345	12.3664	23.7358	46.8289	38.5373	42.9457	29.3692	13.6631	58.2972	21.9764	17.0991	55.3297	19.9012	6.13902	39.3678	18.8252	7.02814	15.2808	24.5838	31.1809	2.65679	46.9161	1.05049	14.6647	12.4472	10.0878	27.3419	30.2544	59.3023	41.85	49.018	43.5455	31.6154	76.7174	16.5114	15.8161	15.1465	42.6774	45.3362	76.4319	21.7541	42.9058	29.5643
CANX	2.8611	239.54	188.828	258.941	210.891	210.85	246.008	329.016	175.796	217.991	397.892	297.073	560.821	217.308	117.406	265.992	249.106	75.7231	255.042	380.285	196.49	263.573	676.351	8.62997	293.934	71.2736	48.7189	165.782	342.86	395.508	275.406	196.145	237.585	304.255	250.681	391.22	142.509	250.179	300.843	231.61	225.648	169.743	245.118	256.166
CBY3	0.00128884	0.731374	0.524575	1.57113	0.557936	0.683412	0.336956	0.112933	0.014512	0.844404	2.01796	1.56149	0.602828	0.0755844	0.0353798	0.528061	0.143316	0.11676	1.14749	0.694661	0.394525	0.0856481	0.335923	0.0178355	1.42655	0.0186184	0.0153041	0.0669937	1.23123	1.36671	0.477013	0.486559	0.708413	0.0719353	1.17693	1.34936	0.140398	1.40472	1.52827	1.33378	1.01324	0.198575	0.977614	1.01423
HNRNPH1	0.264662	285.672	59.7176	134.5	136.834	27.5667	146.268	58.5087	27.3078	335.842	74.7138	62.6202	178.893	73.0766	19.1473	166.238	63.4047	31.6284	40.3969	150.29	173.159	25.0954	101.54	4.76694	61.8024	53.5474	34.8419	100.041	172.081	53.9515	116.516	130.918	128.492	70.8347	88.3483	57.1405	97.3785	43.8947	86.0959	78.5158	468.051	91.9797	168.062	58.7554
RUFY1	0.0293896	18.1622	21.217	18.7217	33.3444	20.1684	15.72	10.4776	9.3975	20.2657	13.2957	17.6052	42.132	8.18881	5.06384	38.7647	8.81787	6.94652	14.3668	24.7165	20.089	7.85967	13.6896	0.752914	14.2238	18.7604	11.5041	11.7421	30.2524	17.2586	25.2336	31.1853	36.5498	12.7939	27.9827	16.9356	24.6547	12.7993	21.2985	24.8221	39.5409	13.055	33.3458	15.8195
TRNAR-CCU	0	0	0	0	0	0	0	0	0	0	0	0	0	0	0	0	0	0	0	0	0	0	0	0	0	0.340608	0	0	0	0	0	0	0	0	0	0	0	0	0	0	0	0	0	0
ADAMTS2	0	4.75328	7.65888	9.02178	198.532	28.8781	15.514	78.4429	125.491	2.05277	12.3529	5.45268	78.5146	0.85385	5.48382	54.8154	10.6051	2.072	8.0799	48.3342	42.5864	0.564903	79.4498	0.0868304	4.32029	0.264168	0.103264	0.0137053	3.55202	23.2219	39.2814	14.6324	17.7897	11.2438	3.64955	5.91155	19.2584	4.30994	4.77808	20.2118	1.42241	25.8055	8.35465	10.1131
ZNF354C	0.00324873	6.83722	6.50671	5.28041	2.40922	0.379291	1.57741	0.162999	0.185983	7.25496	1.73268	3.51263	3.14562	0.0544894	0.12871	1.8181	0.772324	1.27802	3.79	3.27854	2.9001	0.971884	0.418849	0.091621	4.92114	1.41397	0.814842	0.288128	8.10817	4.89835	1.35856	0.845951	0.977324	0.618928	5.59618	2.05264	0.663669	3.87503	2.8235	3.92376	3.01744	0.358434	1.42586	2.22528
ZNF879	0.251527	0.995774	0.972123	1.33068	0.62592	0.141887	0.522126	0.153347	0.103362	1.8073	0.500764	0.609608	1.90881	0.170582	0.193371	0.774933	0.413692	0.522136	0.911109	2.33807	1.48902	1.67557	0.180077	0.0222915	0.703499	0.385098	0.260021	0.278659	2.65036	1.84475	0.992985	0.413485	0.422437	0.343175	3.16902	0.616854	0.458525	0.823441	1.77087	2.09939	1.37424	0.425954	1.16928	0.879804
GRM6	0.00506248	0.00965146	0.119359	0.00269534	0	0.00545582	0.00593353	0	0.000597149	0.0181807	0	0.275716	8.50492	0.000361193	0.000275096	0	0.00554625	0	0.0260221	19.5313	0.0015502	0.00727297	0	0	0.223202	0.0482084	0.0102217	0	75.921	0.0174788	0.00378717	0	0	0.00184196	0.0736166	0.0371791	0.00305974	0.272216	0.00329659	0.0220333	0	0.000378269	0	0.00378834
ZNF454	0.0157724	12.5549	8.73541	10.2842	5.66359	3.9255	8.47447	1.61708	1.0471	14.0269	1.47605	12.6183	9.23231	1.48313	0.595768	4.27528	2.33604	0.459798	11.3661	7.82138	6.24738	4.31694	3.222	0.264499	12.9335	0.66737	0.385589	0.616867	8.94818	8.02089	2.92791	4.9263	5.36306	1.2006	15.1156	10.8859	1.86071	12.0058	10.2456	9.4098	8.05025	2.29179	7.45753	5.26255
ZFP2	0.0096314	2.48486	3.64597	3.30536	1.46897	1.10948	1.48504	0.654842	0.3922	2.84782	1.38439	2.75322	4.26801	0.571604	0.426941	2.29682	1.46226	1.38762	2.53266	5.82497	3.31218	2.55964	0.871286	0.120066	3.32153	0.827651	0.500937	0.626322	4.00327	2.83728	2.09449	2.23482	2.27162	0.992542	2.89741	2.35311	1.21659	3.00117	1.0622	2.05557	2.52968	1.92933	2.91235	1.18551
LOC123385363	0.00309855	3.61895	2.73044	1.87387	2.76336	0.363566	1.70907	0.328594	0.320719	3.38746	0.710257	0.854569	1.75033	0.449413	0.186056	1.21753	0.497136	0.394965	1.80308	1.80712	2.01825	1.19376	0.364656	0.0113981	1.09413	1.04577	0.616769	0.246473	2.15319	1.38303	0.662943	1.44393	1.19349	0.519683	2.33738	0.600898	0.757762	0.244961	1.28528	1.43523	1.99975	0.781362	2.17039	0.501129
LOC111556198	0.0728932	38.6823	18.8573	33.5248	29.1646	6.13494	21.813	7.0811	6.08523	41.5882	14.9766	14.9145	34.838	7.66058	3.48944	33.8754	11.5609	7.66127	12.4757	52.4471	43.9415	19.049	9.76482	1.87698	14.7458	17.9191	10.3639	4.81768	38.2686	19.1333	17.8544	25.5447	28.1492	13.0925	18.2614	19.7649	16.6935	16.1819	14.5374	20.2267	65.7783	26.4857	46.8895	11.1049
LOC101097942	0	0.0566757	0.446031	0	0.150371	0	0.0278745	0	0.0140264	0	0	0	0	0.0288034	0	0	0.0118433	0	0	0.00398262	0.20834	0	0	0	0.0936213	0.148996	0.100041	0	0.06985	0.686091	0	0	0	0	0.935087	0	0.0179675	0	0.614434	0.437503	0	0	0	0.0927216
LOC123384566	0	0.0228146	0.247948	0	0.0403542	0	0.0112208	0	0.00564629	0	0	0	0	0.0447567	0	0	0.00158916	0	0.328067	0.00160319	0.526873	0	0	0	0.113061	0.0839689	0.00805422	0	0.0562359	0.697071	0	0	0	0	0.493545	0.043943	0.0216984	0.122567	0.531771	0.45769	0	0	0	0.0898375
PROP1	0	0.0449441	0.197906	0	0.0695595	0	0.0165785	0	0	0	0.0164625	0	0.0170198	0.309063	0	0.0215926	0.0125223	0	0.0807851	0.00315824	0.0830165	0.0100689	0	0	0.222727	0.0779818	0.0237998	0	0.0138479	1.29326	0	0	0	0	1.93161	0.0865663	0.00712418	0.0905452	2.07242	1.12502	0.111462	0	0.0277643	0.298137
LOC109499730	0	0.258134	1.58408	0.540665	0.114146	0	0.111087	0	0	0.405212	0	1.2862	0.219942	0.602564	0.040467	0.0620081	0.166318	0	0.92797	0.358249	2.02813	0.320696	0	0	0.213203	0.12215	0.0455644	0	0.357905	2.22054	0	0.0402786	0.0585658	0.0574752	4.92231	1.18082	0.0204587	0.520042	0.903735	2.34369	0	0.010117	0	0.359692
LOC109499726	0	0.0910127	0.466166	0	0	0	0	0	0.0225243	0	0	0.0604648	0	0.00340603	0.189373	0	0	0.0242115	0.0817957	0.00319774	1.43015	0.919393	0	0	0	0.00478529	0	0	0.294443	56.6172	0	0	0	0	55.8988	0.0876492	0.158693	0	51.666	56.6584	0	0	0	57.778
LOC123385369	0	0.164202	1.19995	0.871271	0.181524	0.0928209	0.201897	0	0	0.360864	0	2.01814	0.124363	0.112147	0.762884	0	0.280219	0.0436816	0.22136	0.175963	0.421981	0.120392	0	0.0121857	0.813725	0.0345339	0	0.0173105	0.303557	0.53692	0.386591	0.15373	0	0.0313377	1.3488	0.395334	0.052056	0.55134	0.757154	0.690318	0	0.0257422	0.456463	0.496279
LOC111560612	0	0	0.564405	0.0700989	0	0	0	0	0	0	0	0.16676	0	0	0.776269	0	0.0262261	0.0445163	0.112795	0.0176385	0.181425	0	0	0	0	0.0659883	0	0	0.0773393	0.378816	0.196989	0	0	0	0.662739	0	0.039788	0	0.171472	0.556888	0	0	0	0.07882
LOC101087636	0.215423	34.68	17.1508	27.6258	31.9862	7.42341	24.8612	10.7079	9.53231	43.3262	13.5842	15.9298	38.5905	9.39596	8.04369	34.2545	12.8047	5.86703	18.0907	48.2391	53.8783	29.5417	11.5203	1.65951	16.6502	19.751	12.281	8.52679	29.8135	18.0036	20.1297	27.1671	31.0764	14.6427	20.3672	14.3243	20.4897	14.5747	14.6667	20.5411	109.134	35.7332	51.7805	11.7644
LOC123385367	0.0569239	8.60591	13.2706	8.49054	18.0606	1.67476	6.79124	5.44272	6.61646	5.66948	4.65085	4.03029	20.502	5.97933	6.58276	10.7092	6.23768	3.99077	5.00832	16.732	29.628	14.5907	6.58162	0.251276	3.26267	12.6399	7.86926	6.5788	9.95434	11.8097	8.30387	12.8561	9.4105	10.1193	16.4932	4.14393	3.75698	2.74749	9.58941	15.4141	13.7621	11.3628	10.4583	5.49886
CLK4	4.17046	21.7411	18.6641	21.3709	27.7742	4.0443	18.9997	5.76909	5.56786	23.4419	13.78	14.5965	33.4908	10.0231	6.50427	31.3446	21.5062	8.79351	12.7307	46.2727	52.3063	21.0815	6.66382	2.51469	14.5869	11.4069	6.95841	8.18068	33.9008	25.1021	26.7958	27.5977	28.3094	18.7539	42.7725	12.0922	20.7411	10.175	31.7714	30.0743	68.3916	28.6365	42.5756	19.5335
COL23A1	0	7.62546	5.67078	17.2949	1.34098	2.06059	12.8608	4.40479	2.34644	4.40615	0.0258323	5.73954	16.0474	7.28114	0.018594	5.29834	1.51977	0.0211063	3.08989	2.97563	0.508557	0.0689444	7.23522	0	7.69614	0.0403251	0.0155607	0.0167283	44.5455	0.258988	1.08272	2.49526	1.26005	2.10753	0.232757	14.1015	0.0321395	8.62543	0.19572	0.295356	0.0437256	3.01974	0.767862	0.273359
PHYKPL	0.0106241	14.9037	5.37093	10.0442	12.1437	7.59454	10.4436	3.58896	2.60202	15.8849	6.48303	5.8629	15.3369	5.64887	3.02597	9.49556	3.61886	3.16376	10.1479	6.90088	9.55668	4.87099	3.4452	0.441494	6.05197	3.44983	2.59113	6.90534	9.86221	7.55514	7.91372	8.92978	9.1103	4.72212	12.0696	6.36519	6.70376	6.59767	5.45803	6.39648	14.9716	5.06341	13.2949	4.51586
HNRNPAB	1.9428	232.141	55.9835	103.235	77.1988	134.01	192.053	283.786	81.1429	253.886	105.784	88.5807	191.05	246.465	19.318	105.599	76.9271	27.8917	74.74	106.927	81.1059	19.8619	284.507	2.59246	80.2981	52.3152	40.3408	555.636	113.887	124.397	109.593	170.158	159.569	222.108	139.476	54.6146	119.184	67.3489	157.521	155.818	188.7	112.215	100.304	101.311
LOC102899803	0.618155	17.5815	8.94935	10.4127	3.61851	5.41274	12.4589	2.15923	1.27338	20.8043	4.36088	5.79421	6.5618	7.28685	1.57178	9.11185	4.45758	2.46336	3.75326	11.3336	11.203	8.12577	2.14764	0.42122	7.81329	5.02237	3.33961	2.86238	7.31522	9.05066	5.75813	5.86118	6.23988	3.54329	11.9469	4.64402	9.92599	7.65421	7.94391	13.6992	33.0358	4.18151	15.5552	5.40127
NHP2	0.526622	134.351	79.8243	83.368	94.8268	157.683	162.169	206.484	92.4535	109.208	77.8816	122.555	240.505	321.235	43.8398	142.035	137.86	74.4483	130.497	48.6787	159.47	564.909	227.853	61.2245	126.603	35.6528	27.3782	363.232	75.1916	98.5485	104.573	127.002	120.79	135.176	97.5719	80.6056	194.931	124.134	134.882	124.115	83.306	148.43	115.692	99.0536
RMND5B	0.242038	18.3088	18.2293	15.8566	18.0363	20.2551	16.4909	13.3718	9.51883	15.278	10.528	19.58	36.4812	13.2598	3.76776	20.0736	9.2986	6.6975	22.0765	13.3283	22.9732	56.7613	17.1983	1.04389	19.0234	10.442	8.73696	21.1388	13.9238	31.9035	12.2665	17.5366	14.0393	12.3535	45.9339	13.3921	12.4833	21.4343	31.0299	41.5765	27.924	14.974	18.3502	27.0896
N4BP3	0.0178891	3.57727	4.21468	2.91488	2.72259	10.2668	4.19242	0.242237	0.143689	2.80381	3.86085	3.69242	5.15184	2.6091	0.0849256	8.31616	0.943576	0.309373	9.08168	1.29536	1.99098	0.360118	1.64772	0.0603219	4.70819	0.669925	0.380121	5.1777	2.96875	1.32973	5.37455	8.14448	7.79701	0.906595	1.58869	3.52513	0.752986	6.4297	1.2133	1.76585	1.68424	3.63144	2.66717	1.39899
LOC109499762	0.0559791	11.9415	1.77335	1.03782	5.45576	30.0824	10.0647	1.49779	1.0546	8.52487	1.85124	2.43598	13.2097	11.1798	0.0635544	11.5456	0.624701	0.527255	5.49966	1.14902	1.2548	0.363296	6.22472	0.0588346	1.88255	0.698203	0.279879	8.41698	2.54957	3.06095	15.1655	36.3694	28.8017	1.81249	5.17488	0.477185	1.88501	1.59718	6.22817	4.6139	0.57346	11.7112	4.83629	4.70144
B4GALT7	0.891163	12.6159	8.21422	9.79494	11.5715	8.3776	11.6318	15.31	8.24948	8.77593	5.58539	12.2552	25.781	10.4703	4.57498	8.00506	8.36055	3.95936	16.1578	5.98714	9.95574	26.7823	31.7336	0.784139	13.4117	2.25009	1.93995	8.56567	20.7585	12.7819	6.80161	5.65201	5.19545	5.13131	15.9084	9.56318	5.97971	16.9797	12.9274	14.9978	5.20001	6.59446	12.4216	12.6767
TMED9	9.05146	150.097	144.628	126.283	276.428	220.214	196.25	349.951	177.752	117.674	111.376	159.374	981.113	342.606	118.764	220.438	216.836	53.4783	177.682	294.827	328.993	618.966	658.914	10.2916	146.236	38.6277	33.4562	211.948	203.892	143.713	199.42	215.308	177.259	223.555	118.539	183.642	125.05	167.052	113.873	207.89	78.3211	374.472	175.974	144.236
LOC101099424	0	5.92969	77.8629	28.3778	0.912031	0.510081	5.11723	0.198261	0.0888711	5.04149	0.350754	64.5723	12.2247	0.438998	0.424111	0.389279	10.7505	1.40108	93.0455	21.153	5.34082	18.1481	0.650458	0.142129	51.9263	0.298218	0.0520087	0.944364	16.7722	1.39699	0.780409	0.356309	0.417806	0.916115	2.34464	49.3909	1.14426	70.1676	2.45308	1.86634	0.852508	1.14072	2.04768	1.10158
YTHDC2	0.00529084	12.6146	34.8596	24.3743	16.5227	3.54502	7.02965	6.49226	4.20421	15.8951	7.35112	30.2685	15.9646	4.63398	6.47216	11.8563	12.4198	7.95688	32.3289	23.0879	14.8577	1.53588	12.1291	0.187327	33.818	4.55314	2.5507	5.55963	23.4374	22.7448	9.38522	7.58897	7.55962	6.65975	48.1608	17.0923	6.17431	30.9964	20.8357	20.0953	26.1408	7.28819	15.3545	10.3192
LOC111556766	0	0	0	0	0	0	0	0	0	0	0	0	0	0	0	0	0.0748637	0	0	0	0	0	0	0	0	0	0	0	0	0.648809	0	0	0	0	2.20712	0	0	0	1.83552	1.00218	0	0	0	2.5312
LOC123385399	0	0	0.408348	0.202867	0	0	0.0446591	0	0	0	0	0.241302	0.137544	0.0441764	0.0103527	0	0.056924	0	0.326429	0.0191423	1.13274	4.35705	0	0	0	0.248262	0	0	0.0559551	0.566421	0	0	0	0.184849	1.43848	0	0.0575734	0	0.6203	0.429186	0	0.00355884	0	0.149694
LOC105260504	0	0.0586727	0.252862	0.0655416	0	0	0.00721417	0	0	0.147364	0	0.155918	0.0444372	0.0186639	0	0	0.00613028	0	0	0.0494754	0.0298423	0.358488	0	0	0.0969201	0.0616982	0.0207131	0	0.198856	2.50884	0	0	0	0.111976	7.79729	0	0.0186006	0	3.91791	4.19471	0.0970064	0.00344933	0	3.01001
KCNN2	0	2.84042	9.45988	10.8972	0.62104	0.1442	0.768977	0.0593426	0.00283738	2.67798	0.0839887	20.2415	2.65163	1.27366	5.8174	0.0771132	2.1468	0.235861	11.025	3.4437	1.07756	0.646326	0.014008	0.00170165	7.49019	0.0235093	0.0182134	0.00107435	11.7437	0.997773	0.771533	0.527739	0.600867	0.420105	0.978748	8.67006	1.29302	8.09174	1.21199	0.720497	0.104255	0.889134	0.95967	0.800122
LOC123385404	0	1.36869	8.05434	5.67002	0.490728	0.0209108	0.383362	0.00145883	0	1.5131	0.0154853	8.27848	0.930551	0.291508	1.64543	0.0203109	0.869071	0.136832	4.4264	4.98866	0.377429	0.0318578	0	0.00156869	4.05044	0.0366764	0.00373118	0	7.56476	1.00169	0.186626	0.372712	0.350096	0.130438	0.905376	3.30291	0.413805	3.00935	1.03607	0.487999	0.297064	0.4977	1.50821	0.293715
LOC123385405	0	0	0.0437372	0	0	0	0.0574	0	0	0	0	0.155072	0.022098	0	0.0066531	0	0.00406466	0	0.104889	0.00820113	2.15573	4.32366	0	0	0.0963939	0.0368179	0	0	0	0.493172	0	0	0	0.00742453	0.547812	0	0	0	0.11959	0.305835	0	0.00457414	0	0.0824576
LOC123385406	0	0	0	0	0	0	0	0	0	0	0	0	0	0	0	0	0.047878	0	0	0	32.5502	46.981	0	0	0	0.0722802	0	0	0	0.553248	0	0	0	0.131181	0.403295	0	0	0	0	0.22101	0	0	0	0.107919
TRIM36	0.0346575	4.56916	17.8475	3.85138	0.71745	7.68793	2.71369	0.754171	0.78536	6.59199	0.83026	49.0284	3.94848	2.2966	0.165939	1.07753	3.77265	0.19465	9.57452	14.0343	1.99153	1.00785	0.0821572	0.00708271	23.6087	4.31802	3.16712	6.60418	6.91778	210.905	3.51092	5.35371	6.47436	16.7406	242.811	36.2479	3.42655	21.7109	480.422	209.028	1.42015	3.16965	1.23812	171.482
PGGT1B	1.17384	29.6052	18.4028	22.261	22.6427	6.67758	22.363	20.7652	15.4752	29.4855	24.3789	17.8361	44.4701	23.7937	4.64425	23.6156	22.2128	12.9768	14.1919	35.7332	33.5642	28.0094	28.297	1.74967	21.9726	16.1639	10.7358	23.2392	24.2444	21.2359	20.1692	20.3213	18.2069	35.4936	32.2346	18.6862	21.7268	20.1924	18.907	21.6342	37.9718	25.8675	20.897	16.65
CCDC112	0.244725	21.8682	21.3982	71.2206	12.9492	6.18756	22.9497	10.3535	5.8225	25.4392	13.7811	37.9497	44.9006	11.007	1.64911	19.8969	19.165	4.43715	39.8287	37.3266	30.7809	21.4322	4.84222	2.13101	49.7432	3.43816	2.37541	7.74732	52.1363	30.3688	19.7278	11.1055	12.4279	11.5544	65.6342	23.4786	14.3837	54.6364	117.584	42.103	10.7331	11.9146	28.2476	31.8439
LOC123385418	0	0.397357	0.446737	0.234994	0.57881	0.0264259	0.19543	0.012905	0.0115694	0	0.530819	0.760903	0.1549	0.160078	0.0293141	0.134755	0.133505	0.103634	0.0840273	0.280045	0.205234	0.0133293	0.00519253	0.00693848	0.308887	0.176971	0	0.0109517	0.0720182	0.893641	0.293498	0.116711	0.127275	0.0713741	1.61142	0.135061	0.0148202	0.188358	0.143707	0.668884	0	0.077868	0.577573	0.0770669
LOC101100437	0	0.0833161	0.499572	0.18614	0.368421	0	0.0614653	0	0.0206195	0.313889	0.244141	0.110703	0.0315508	0.056124	0.0783673	0.140097	0.0145085	0.657533	0	0.111238	5.37512	7.38813	0.0462717	0	0.068814	0.131418	0	0.00878332	0.102683	2.48123	0.0653854	0.0260008	0.0756113	0.0238511	47.2343	0	0	0	0.455324	9.90525	0.13775	0.0522464	0	3.51882
LOC109499806	0	0.356578	1.11358	0.564292	0.420474	0.111982	0.224089	0.0656237	0.00980533	0.199021	0.711101	0.526433	0.202548	0.287648	0.127609	0.361658	0.168343	0.115938	0.213645	0.623637	0.0912123	0.0225937	0.0176031	0.011761	0.392682	0.124989	0.0559477	0.0324861	0.219733	1.2995	0.186559	0.321473	0.215736	0.0478887	3.04525	0.267089	0.087923	1.48995	0.676634	1.1478	0.262021	0.0993803	0.146851	3.25335
LOC102900481	0	0	0.310554	0.257139	0	0	0.135856	0	0.0455749	0.462522	0.202358	0	0	0.110266	0.0419912	0	0.173166	0.538876	0.0827512	0.0582318	0	0	0	0	0	0.348566	0	0.0905968	0.113479	0.926389	0	0	0.250683	0.02343	1.02645	0.177346	0	0	2.01279	0.378952	0.152234	0.0108262	0.455041	0.664998
FEM1C	1.11349	44.3856	38.1212	104.839	39.137	23.8386	36.6953	26.0328	10.1513	53.5998	31.1401	39.5431	44.9116	38.1184	13.2665	33.9796	30.0229	42.1959	40.8262	66.5885	22.7097	8.75505	34.1481	1.31484	44.7437	11.3933	5.96654	19.5281	107.639	113.397	45.0053	44.6093	57.6753	18.9545	188.39	63.8476	22.3381	35.9407	154.917	60.9649	62.6699	31.4352	91.1413	59.6955
LOC101090324	0.0995468	4.11859	3.53432	8.02356	10.8218	9.89756	9.12755	6.22308	1.71852	3.89789	6.58824	12.5311	13.5736	13.6594	19.1843	24.5666	8.4124	4.98597	5.44495	15.4229	17.3401	26.1751	10.4003	0.590623	14.3299	5.45661	4.15824	9.83883	12.8125	8.5638	14.1937	10.4563	12.5674	36.38	6.6775	8.02857	28.3342	15.3121	4.18631	6.33092	8.94771	13.73	33.6778	5.8401
TMED7	1.26705	153.348	83.4142	121.127	152.676	61.4422	126.44	204.777	164.554	149.363	98.0515	112.273	342.175	152.619	66.6973	101.272	133.542	35.6035	82.4797	190.614	85.4701	58.6864	342.83	5.98853	114.276	44.5913	32.196	97.4904	138.788	211.03	92.8249	92.9124	102.129	179.571	296.847	148.261	40.1253	100.444	174.336	114.85	92.1711	127.622	89.4253	121.721
LOC123385429	0	0	0.0446631	0	0	0	0	0	0	0.099778	0	0	0	0	0	0	0.0304385	0	0	0.00279158	0	0	0	0	0.065623	0.0543073	0.028049	0	0.0979215	24.669	0	0	0	0	50.4284	0	0.138536	0.160067	27.6538	26.1868	0	0.00778495	0	21.8772
LOC109499826	0	1.92145	0.169429	0.315646	0.0999597	0	0.291843	0	0	0.283881	1.73881	1.20143	4.90079	0.177654	0.0257728	0	0.5511	0.140316	0.25395	0.222387	0.0484108	0.0644548	0.0251088	0	0.840175	0.0950837	0	0	0.208949	24.1081	0.443508	0	0.205148	0	26.4767	0.217698	0.161244	0.151803	33.5676	25.7573	0	0.110746	0.837867	63.8406
CDO1	0.0359474	288.481	47.8783	116.168	175.195	41.6498	113.707	11.5348	3.80346	233.389	282.475	132.938	327.758	90.6877	595.372	81.7963	744.477	189.1	120.425	220.578	28.8534	52.1924	0.455213	1.94383	160.783	0.0749491	0	2.0663	133.08	209.858	473.279	28.8044	76.5682	80.3001	185.91	72.1147	4.97101	149.931	289.548	175.048	4.41902	265.014	286.467	210.247
ATG12	18.9707	83.1008	40.4504	71.584	56.0625	15.1316	41.5096	34.7829	52.2066	86.4644	52.2192	88.829	119.274	46.3834	15.454	49.4895	50.4977	36.8181	62.5816	100.216	65.1242	111.598	37.8388	4.69446	103.367	18.3945	15.4795	13.9264	76.4542	40.3507	59.5989	33.6847	33.4175	45.7341	66.6611	51.9744	22.8777	83.015	45.0668	45.3054	45	59.7958	49.4846	41.3897
AP3S1	5.74368	38.303	22.6327	39.0009	32.9251	21.6521	30.6366	29.1383	23.1936	44.8646	12.0787	44.7859	37.7068	28.4474	6.66669	29.5968	17.1289	2.89823	54.6938	32.4911	16.3915	18.0377	29.0925	3.2149	67.0046	10.1274	8.54758	20.1919	37.7452	34.5244	29.3382	27.5856	40.7805	27.1796	73.1728	25.0674	16.7163	43.2392	120.487	42.2706	62.9162	24.32	45.3703	36.2224
LOC109499833	0	1.13528	6.22041	4.65731	1.14252	0.464719	0.943432	0.378242	0.799296	1.13073	1.43393	1.82055	1.05255	0.351611	0.889313	1.09085	0.409024	0.735935	5.84037	3.80726	0.630875	0.213676	0.321775	0.0116208	4.20335	0.87684	0.801571	0.420954	5.74144	9.07474	1.07529	1.295	0.817128	1.18046	12.3114	2.97836	0.53366	4.36399	23.3464	7.71979	2.9126	0.489444	1.69284	6.71187
LOC123385448	0	0	0.219771	0	1.76338	0.331503	0	0.0647556	0.116108	0.294583	0.171844	0.311682	0	0.166794	0	0	0.302277	0.0416016	0.527046	0	10.0534	1.39502	1.19855	0	0	0	0	0.0769354	0	0.660824	0.736365	0.219614	0	0.0149227	2.5462	0.451811	0	0	0.721099	0.407289	0	0.0689524	12.3173	0.165733
LVRN	0.000728556	0.162509	0.397551	0.0176492	3.21778	0.31642	0.105458	0.1296	0.090492	0.110544	0.325735	0.203932	0.226502	0.34218	0.0733403	0.0520499	1.01751	0.212954	0.0730258	0.0410788	1.01809	0.126291	1.59348	0.00469003	0.0298273	0.0199371	0.00159362	0.0433852	0.0278173	0.584977	0.729785	0.659296	0.540764	0.093331	0.978655	0.0141288	0.0200353	0.109131	0.370049	0.558593	0.115684	0.20094	23.3854	0.415504
LOC111557054	0	0	0.0707007	0	1.11232	0	0	0	0	0	0	0	0	0.188274	0.233018	0.151062	0.906727	0.334583	0	0.13257	0.202012	0	0.209552	0	0	0.198386	0	0.0294646	0	0	0	0.392502	0	0.0400056	1.10691	0	0	0	0	0.525721	0	0.0633424	20.3952	0.0493673
ARL14EPL	0	0	0.211152	0.0179829	0.284744	0.0364003	0.0791751	0.0177761	0.00796816	0.161732	0.0471728	0.449188	0.414542	0.0837414	0.018354	0	0.24557	0.0314051	0.766801	0.00678737	1.75481	2.11014	0.143049	0	0.930732	0.0677135	0.0113663	0.00452561	0	0.492379	0.126337	0.0401908	0.116876	0.0204822	1.124	0	0.0510353	1.03782	1.05573	0.790398	0.053232	0.140699	4.93258	0.47391
COMMD10	0.864249	9.10088	8.43909	8.23185	4.99653	6.90805	8.48393	11.7887	6.67494	8.83784	4.77763	11.5539	18.511	8.92977	2.81388	8.44969	6.0475	3.06579	7.79288	16.2016	13.6168	35.9941	10.3298	0.603386	12.7816	2.97308	2.50613	7.63387	8.59016	6.60357	6.31334	7.87271	7.90259	6.97099	7.09088	9.16078	7.46413	14.5821	3.31409	7.10791	7.87882	9.14591	9.36256	6.15909
LOC123385454	0.000646985	0.926017	0.842789	0.815003	2.22999	0.117836	0.549089	0.0752511	0.0525814	1.15284	0.361214	0.31426	0.660354	0.124218	0.104663	1.38281	0.376121	0.255229	0.259399	0.791421	2.23725	0.0754391	0.0302783	0.00356993	0.337719	0.166089	0.152841	0.0619824	0.600279	0.438817	0.544259	0.405332	0.4402	0.171373	0.703263	0.492224	0.358383	0.290738	0.383386	0.587116	1.55754	0.39357	1.98112	0.181895
LOC123385460	0	0.0348542	0.0522474	0.0194673	0.0462372	0.0197025	0.00857108	0.00962171	0.00431296	0.175082	0	0	0.0263977	0.00652187	0.00198691	0	0.0661568	0.0370882	0.0313245	0.0238799	0.597142	2.80679	0	0	0	0.0439818	0.0123045	0.00163306	0	0.266512	0	0.0108771	0	0	0.327201	0.0167831	0.0331489	0	0.285718	0.385516	0.288131	0.00819623	0	1.14508
SEMA6A	0.000523855	62.7091	14.2853	20.5828	11.5986	7.39427	22.1931	0.624978	0.00481975	65.2795	7.54478	19.8451	10.2978	1.22151	1.15913	17.6945	2.79139	1.29491	17.383	13.8893	10.8049	0.1494	1.24166	0.0342045	15.2406	0.0822578	0.0435428	0.31336	18.6144	8.45806	12.0957	6.23766	6.43331	12.3898	12.0636	74.2282	0.968804	16.158	14.0329	8.8343	1.08403	2.70308	10.8156	7.13389
LOC109499869	0	8.15167	5.24751	2.04885	2.61627	0.535124	2.34085	0.0653318	0.0130156	8.96564	1.6663	2.81262	1.28456	0.289321	0.347772	4.18163	0.942374	0.75549	1.65429	3.2004	4.12501	0.315976	0.195693	0	1.52031	0.129963	0.0742651	0.0535947	1.88778	10.0164	2.22875	1.60021	1.4557	3.40086	21.5228	5.07744	0.200073	1.57161	8.40378	8.70667	0.130428	0.435946	2.17673	4.81876
LOC111560530	0	1.16201	0.867202	0.465179	0.357259	0.118405	0.29495	0.0144557	0	0.867419	0.147966	0.496987	0.186024	0.0227698	0.0527374	0.335439	0.0498491	0.0535103	0.282372	0.275453	0.331358	0.0140168	0.0149566	0.000740209	0.22655	0.0451012	0	0.00771107	0.328834	0.599107	0.209391	0.166531	0.167461	0.247465	1.47915	0.970175	0.018182	0.227737	0.527485	0.841005	0.0412275	0.0367467	0.215658	0.282409
LOC109499875	0	0.249906	0.722071	0.111665	0.260798	0	0.104473	0	0	0.276176	0.029292	0.152744	0.0369081	0.00374096	0.00541355	0.0864454	0.00557031	0.0124098	0.0628873	0.138205	0.194007	0.00325742	0	0	0.181638	0.0420468	0.0141158	0	0.0246398	0.545109	0.0313797	0.0124783	0.0272155	0.0089029	1.53959	0.245484	0.0158452	0	0.3807	0.805464	0	0.00891304	0.0802776	0.126735
LOC123385468	0	0.0392645	0.309007	0.131584	0.0781319	0.0443913	0.0579338	0	0	0.0739636	0.0359553	0.156514	0.0353138	0.0058777	0.00111916	0.160344	0.109057	0	0.123508	0.0303504	1.98815	2.69373	0	0	0.0648602	0.0578049	0.0138615	0	0.0604895	0.460229	0.0770358	0.0122535	0.0178168	0.0124893	1.15189	0	0.0062239	0.0527353	0.744329	0.389795	0	0.0150042	0	0.409957
LOC123384582	0	0	0.497818	0.197852	0	0	0	0	0	0	0.194627	0.117669	0.033536	0.00662837	0.00504838	0.0850928	0	0.0157058	0.15918	0.0466727	1.0834	1.28779	0	0	0.109716	0.288688	0	0	0.054572	0.596969	0.138999	0	0	0.0338025	0.649501	0.426428	0	0.118941	0.120993	0.380137	0	0.0138835	0.109414	0.0208563
LOC123384587	0	0	0.102222	0.0435288	0	0	0.0191649	0	0	0.293612	0	0	0	0.0116663	0.00222135	0.0748839	0	0	0.0700412	0.0191675	0.398476	0.0158724	0	0	0.289658	0.0737572	0	0	0	0.69001	0	0	0	0.00991568	1.62328	0.0750536	0	0	0.266193	0.333277	0	0	0	0.104007
LOC123385475	0	0.0897007	0.134464	0	0	0	0	0	0	0	0	0	0	0	0	0	0	0	0	0	0.122464	0	0	0	0	0.150922	0.0633338	0	0	0.379046	0	0	0	0	2.39468	0	0	0	0.459578	0.410997	0	0.0140625	0	0.0915431
LOC123385477	0	0.167696	0	0	0	0.0236989	0.0515481	0	0	0	0	0	0.0317521	0	0	0	0	0	0	0	9.59333	13.3166	0	0	0	0.105806	0.118403	0	0	0.101233	0	0.209334	0	0	0.344374	0	0	0.450457	0.114558	0.1348	0	0	0	0.0658231
LOC111557061	0	0	0	0	0	0	0	0	0	0	0	0	0	0	0	0	0.0447555	0	0	0	0	0	0	0	0	0.202699	0	0	0	0	0	0	0	0	0	0	0	0	0	0	0	0	0	0
LOC123385481	0	0.0795596	0	0.0799864	0.0281448	0.0134921	0.0723893	0	0	0	0	0	0.0783333	0.00476386	0	0	0	0	0	0.125231	2.30953	5.37309	0	0	0.105138	0.0301184	0.0112347	0	0.960922	0.0512294	0	0.0297942	0	0	0.1167	0.0612954	0	0.213709	0.0380445	0.0506508	0	0	0	0.018737
LOC111556922	0	0	1.24222	0	0	0	0	0	0	0	0	0	0	0	0	0	0	0	0	0.0776424	0.236625	0	0	0	0	0	0	0	2.04262	0	0	0	0	0	0.324143	0	0	0	0	0.0355268	0	0	0	0
LOC123385482	0	0	0	3.50632	0	0	0	0	0	0	0	0	6.01974	0	0	0	0.0150137	0	0	1.47866	0.0519302	0	0	0	0.178026	0.0339987	0.0760929	0	32.2346	0	0	0	0	0	0	0	0	0	0	0.00693048	0	0.00422389	0	0
LOC111560532	0	0.0383476	0.014371	0.326632	0.0339143	0	0.0612959	0	0	0.0120394	0.0280925	0	0.704304	0.00861065	0	0	0.01202	0	0	0.749799	1.37044	2.57342	0	0	0.0633455	0.0120975	0	0.00089837	13.0235	0.354955	0	0.0119673	0.0348013	0	0.118124	0.0184652	0.0243142	0	0.111334	0.189883	0	0.00638755	0	0.0331144
LOC109499886	0	0.159395	0.0256004	0	0	0	0.111992	0	0	0.514725	0.0333626	0.121023	0.0431149	0.00511299	0	0	0.00634438	0	0	0.0480031	0.0365738	0.00742017	0	0	0	0.0191559	0	0.0042676	2.93267	1.33794	0.0893509	0	0	0.00579433	1.91052	0.131575	0.0577509	0.244663	2.02219	2.62552	0	0	0	3.11573
LOC123385484	0	0	0.0222001	0.00827173	0	0	0	0	0	0.0325469	0	0	0.0504741	0.00110847	0	0.0711505	0.00825255	0.00262648	0	0.00104068	1.3285	3.3302	0	0	0.0489275	0.0965546	0.0209129	0.00797977	0.00912609	0.0208603	0	0	0.0201602	0.00942133	0.0912376	0.0142623	0.113079	0	0.0252922	0.03119	0	0.0033375	0	0.017439
LOC101080505	0.00982443	0.07786	0.0984113	0.062464	0.235372	0.212863	0.0574402	0.0234477	0.000700699	0.138667	0.0399269	0.0413814	0.222207	0.0135625	0.00694021	0.416232	0.0530502	0.0227211	0.0254454	0.155085	0.231848	0.145773	0.0528333	0.00252136	0.0607999	0.658572	0.288861	0.0777701	0.194971	0.136732	0.373288	0.0936583	0.11434	0.0657418	0.229245	0.0245398	2.6546	0.0342236	0.224358	0.119074	0.634287	0.0736259	0.21513	0.116244
DTWD2	0.00271601	0.377705	0.979971	0.598944	0.659812	0.240993	0.138634	0.067103	0.0481265	0.666878	0.184922	0.186335	0.357935	0.0452045	0.206895	0.265006	0.0436314	0.345043	0.247029	0.273101	0.339771	0.621117	0.227422	0.00416289	0.182235	0.541898	0.228395	0.145125	0.746073	1.44819	0.679415	0.923722	1.14202	0.100395	2.74162	0.235895	0.378093	0.155702	0.682095	0.842964	0.507002	0.104723	0.214847	0.565131
LOC123385502	0	0	0.449143	0.172749	0.273533	0.131127	0.0190145	0	0.0191361	0.971024	0.0566443	0.102739	0.117124	0	0.0925646	0.0742962	0.0269294	0.342825	0	0.0597679	0.0248386	1.25353	0.996272	0.0459056	0	0.121964	0.109188	0.00362286	0.238239	1.38475	0.182044	0.0482606	0.280687	0.00983786	0.952714	0	0.0735389	0.311549	2.35053	2.28231	0	0.0454572	0	1.6814
LOC123385509	0	0	1.18642	0.254627	0.313584	0	0.0311409	0	0.0877522	0	0.166984	0	0.0575456	0.0246434	0.0288757	0	0.0493959	0.251534	0.182095	0.218906	0.0894946	0.00825311	0.016879	0	0.418368	0.0532656	0.0357643	0.00474666	0.873993	1.37601	0.0397523	0.221308	0	0.0128895	6.583	0.243908	0	0.340159	0.865072	2.07821	0	0.00992632	0.375496	0.544775
DMXL1	0.0146412	3.59088	13.7904	11.202	5.78188	1.40852	2.21411	2.66583	2.68067	3.57816	4.52241	7.29047	5.04594	1.44023	2.93944	4.91186	3.97584	5.87891	5.13367	6.67813	2.04072	0.220172	2.77655	0.119385	9.14981	3.35599	2.22312	2.21471	10.6289	8.49101	4.79845	4.66038	4.67074	2.3394	10.9445	8.05136	2.74293	7.26674	4.42372	4.48319	7.45185	3.80745	3.19525	3.03165
TNFAIP8	0.29065	8.15409	1.84419	1.22439	8.91723	5.7479	6.75696	0.624542	0.954695	5.79251	7.31298	2.95272	7.44466	0.883649	0.940248	8.99902	4.64792	0.274011	1.96564	6.31118	2.56648	1.51921	2.67006	1.62608	2.42792	11.1335	8.09663	26.257	2.61825	1.99055	11.5859	14.2098	12.7993	3.79307	1.02425	2.50727	21.1511	3.42258	2.18631	1.97988	22.0946	8.25607	6.91047	2.28443
LOC109499912	0	7.65489	4.54214	0.356294	7.89825	2.88479	4.70608	0.0586994	0.526243	3.73844	7.94437	1.13013	1.85202	0.33422	0.969725	6.12943	1.1997	0.377108	2.67542	2.43554	1.13844	0	0.661319	1.23084	4.21498	10.5539	7.65678	8.65773	1.83444	1.88264	16.3537	13.8025	9.84158	2.02906	1.37236	5.11944	6.60624	0	1.16206	1.46312	29.1796	4.09191	2.36441	1.3354
HSD17B4	0.0657835	76.9394	57.2598	64.0159	46.1108	71.9704	67.2465	51.2119	40.0078	64.289	64.82	57.7382	109.039	101.551	259.962	65.8072	106.844	27.0453	34.037	79.1159	80.538	95.8914	106.786	5.1523	61.2328	16.3802	11.4395	34.9277	62.8434	70.0248	95.4431	99.7923	96.1337	42.4714	73.1333	68.606	30.8974	45.8171	66.2997	76.0827	49.1571	51.9913	67.7184	78.7521
LOC123385521	0	0.270353	1.5932	0.415256	0.466242	0.0611306	0.132966	0.0223898	0.0167271	0.373466	0.32679	0.395144	0.209878	0.0333882	2.01664	0.337705	0.157949	0.227748	0.0728922	0.586795	0.175142	0.00440493	0.0840826	0	0.535909	0.0938171	0.0668097	0.0323013	0.597673	0.369929	0.450861	0.282641	0.276021	0.0687953	0.372768	0.234326	0.145704	0.0363106	0.203154	0.311637	0.290542	0.0756285	0.0334023	0.316231
FAM170A	0	0.0110424	0.322263	0.0632177	0.102541	0.00156052	0.0264758	0	0.00136642	0.0138672	0.101118	0.0440165	0.0146357	0.0150835	0.383829	0.0424411	0.0127873	0.029865	0.0148862	0.0539287	0.704713	0.971325	0.00367961	0.00245842	0.0547221	0.0220624	0	0	0.0374254	0.709924	0.0563286	0.0189533	0.0150319	0.00737598	1.08846	0.0903917	0.0131276	0.0815694	0.95235	0.965387	0.0182569	0.00692455	0.00682147	0.4421
LOC123384600	0	0	0.455556	0.0261138	0.027566	0	0.00383247	0	0	0.0391431	0.022834	0.0414151	0	0.00583237	0.58103	0.0299496	0.0423366	0.0663344	0	0.0164271	0.473936	0.0292014	0	0	0.051488	0.078664	0	0	0.0192074	0.715007	0.0856148	0.0194544	0	0.00594863	1.49962	0	0	0	0.212927	0.593306	0	0.00671891	0.0385099	0.0587254
PRR16	0	1.75388	1.35235	0.958093	0.748219	0.840607	1.88363	1.71435	0.441709	1.44248	0.188317	0.415061	1.27782	0.578186	1.25024	0.187596	0.976934	0.0190438	1.93303	1.07857	0.553303	0.286293	0.269267	0.00434665	2.63381	0.0153978	0.00918987	0.000304921	0.824122	0.241609	0.923146	0.532108	0.859332	0.289183	1.09779	1.36942	0.629262	1.97537	0.251183	0.288902	0.279755	0.395986	5.00924	0.135385
LOC111556745	0	0	0	0	0	0	0	0	0	0	0	0	0	0	0	0	0	0	0	0	0	0	0	0	0	0	0	0	0	0.679705	0	0	0	0	10.5702	0	0	0	0	1.55675	0	0	0	0
LOC109499926	0	0.0770701	0.0866475	0	0	0	0.0189525	0	0.00953686	0	0	0	0	0	0	0	0	0.0136683	0	0	0.00825256	0	0	0	0	0.105358	0	0	0	3.83054	0	0.0240516	0	0	16.0529	0	0	0	5.21222	3.69729	0	0	0	2.02683
LOC111556982	0	0	0	0	0	0	0	0	0	0	0	0	0	0	0	0	0	0	0	0	0.0586084	0	0	0	0	0	0	0	0	0	0	0	0.993449	0	5.78056	0	0	0	0	0.633561	0	0	0	0.171871
LOC109499940	0	0.00646341	0.0529857	0.000749085	0	0	0.00178811	0	0	0	0.00236747	0.002147	0	0.000181414	0.00147382	0	0.000619038	0.00085971	0.00435664	0.00107869	0.0673926	0.12522	0	0	0.0106768	0.0100251	0.00456354	0	0.00398292	1.059	0	0	0	0.00102794	3.51538	0.00622455	0.00204906	0	0.974961	0.984381	0	0	0	0.279112
LOC111560548	0	0	0.786291	0	0.10757	0	0	0	0	0	0	0	0	0	0	0	0.00847223	0	0	0.00213676	0.647949	0.640358	0	0	0	0.038371	0	0	0	13.7549	0	0	0	0	50.2202	0	0	0	4.3622	10.3019	0	0	0	1.96697
LOC101092231	0	0	0.184607	0	0	0	0	0	0	0	0	0	0	0	0	0	0	0	0	0.0346156	0	0	0	0	0	0.259004	0	0	0	3.07283	0	0	0	0	16.6191	0	0	0	0.168256	4.27654	0	0	0	0.0773422
LOC123385544	0	0	0.070776	0.021888	0	0	0.0116107	0	0.0116849	0	0	0	0	0.00176695	0.00269153	0	0	0	0	0.00331779	0.0581403	0.0038464	0	0	0.155986	0.0496493	0.0333362	0	0	3.83827	0	0	0	0.0300361	16.0444	0	0.0449045	0	5.78146	4.77144	0	0.00185048	0	2.69091
LOC111560553	0	0	0.221899	0	0	0	0.012134	0	0	0	0	0.131125	0	0	0.0168771	0	0.0103109	0.0175018	0.0886916	0.00346734	0.0528356	0	0	0	0	0.0726422	0	0	0	6.81123	0	0	0	0	31.2671	0	0.0312857	0	9.16843	7.21035	0	0	0	1.90068
LOC102901339	0	0.00605586	0.0346095	0.00845604	0	0	0.0163813	0	0	0	0	0	0.00114664	0.000226633	0.00120828	0	0.00200365	0.003222	0.00272128	0.00473421	0.0694655	0.000493348	0	0	0.00500177	0.0162387	0	0	0.0401166	5.18535	0	0	0	0.0007705	14.1789	0.00583205	0.0441566	0	9.85674	5.42797	0.00500622	0.000593367	0.00374102	2.71305
LOC123385545	0	0.0713204	0.220504	0.0331959	0.0630753	0	0.0409233	0	0	0.0298551	0.0348318	0.189529	0.0180054	0.00711754	0	0	0.0132476	0.0252972	0.0427318	0.00918813	1.91495	3.43674	0	0	0.137448	0.0324992	0	0	0.0439495	0.397053	0	0	0	0	2.61886	0	0	0.0159648	0.276085	0.483101	0	0.00139763	0	0.0727853
LOC123385547	0	0.108563	0.539074	0.18191	0.0960127	0	0.0934397	0	0	0.136336	0	0.576997	0	0	0	0	0.015124	0.0192536	0	0.0152576	0	0	0	0	0.538	0.205491	0	0	0.0334498	4.01956	0	0	0	0.0138128	15.9722	0	0	0	1.74282	2.14503	0	0.00850983	0	2.05393
LOC123385548	0	0.383974	0.708691	0.30561	0.20375	0	0.136915	0	0.00950279	0.2411	0.028129	0.459171	0.101784	0.0186806	0	0	0.0294203	0.0204292	0	0.123442	0.0925096	0.0187685	0	0	0.475708	0.0524906	0.0271107	0	0.0236614	2.55745	0	0	0	0	11.8728	0.110935	0	0	0.91806	1.98032	0	0.023326	0.0474401	0.467218
FTMT	0	0.344681	0.568354	0.0770066	0.3658	0.0779371	0.26276	0.0380605	0	0	0.050501	0.549577	0.443789	0.0103194	0	0	0.158458	0.0733546	0.247819	0.0532858	0.0516711	0.0870475	0.18377	0	0.341622	0.07974	0	0	0.785884	60.0915	0.135251	0.0860529	0	0.0087709	110.906	0.199166	0.568215	0.648106	140.311	49.7214	0	0.0770016	0.681367	46.3458
LOC109499965	0.00484778	0.450555	1.17912	1.35472	0.345338	0	0.247446	0.0165838	0.0223011	0.754419	0.451089	1.39687	0.665415	0.059577	0.0265405	0.057723	0.0711357	0.0719149	1.24177	0.641127	0.36264	0.0495517	0.0133454	0.00445818	2.23278	0.0805439	0	0.0154809	1.47151	5.79632	0	0.131233	0.109037	0.0200638	21.9921	0.433904	0.0571346	1.21026	4.1705	5.23074	0.273139	0.112426	0.259776	1.39711
LOC101092731	0.330942	28.6433	46.7552	65.6037	12.3826	34.0313	28.6161	81.3179	39.3636	26.3946	18.8944	64.2258	58.8043	32.9631	7.32527	17.2809	41.7047	8.71076	91.74	32.0617	12.6514	68.9253	28.2994	5.10729	88.8085	3.86105	2.21692	41.7523	49.3193	19.4401	23.1829	35.2688	33.6997	21.1438	24.7248	53.9969	18.7402	85.2165	25.5165	23.0074	12.0777	27.9251	28.7782	18.1362
SRFBP1	0.496568	26.3814	29.0588	31.2798	19.2789	7.28999	25.443	18.1436	18.2586	28.7321	13.3558	30.7043	39.45	29.0994	5.1144	19.0275	18.9597	9.09623	21.7977	30.6963	25.2487	30.6647	33.1061	3.36665	37.6314	9.97811	6.26286	19.012	34.6519	28.8611	24.3	27.7429	26.734	12.4643	47.0702	20.9934	14.465	33.8058	41.5666	29.5669	36.5826	21.3759	33.4032	28.7528
LOX	0	50.8556	3.32397	12.2848	1107.1	55.9233	224.654	1490.23	501.927	18.7264	12.0913	16.2154	64.7491	125.589	0.678894	85.1018	37.8511	2.50574	3.12897	79.0976	27.1947	3.7262	571.792	0.150375	15.4884	0.304122	0.143068	0.0513542	5.69275	8.30303	113.137	17.2174	20.9553	14.9073	8.14394	6.08487	29.8855	12.5683	10.8347	8.18466	0.944143	37.6896	16.6369	10.4162
LOC109499977	0	0.446233	2.71107	0.29322	2.50716	0.11277	0.907566	0.313035	0.20788	0.210969	0.030767	0.558038	0.0795213	0.692743	0.0682338	0.615411	0.185032	0.519525	0.462378	0.201791	0.48569	0.0230948	0.142282	0.00623354	0.416257	0.141325	0.103786	0.0221377	0.148813	1.50957	3.72446	0.308006	0.114344	0.0507637	2.98166	0.182008	0.129816	0.282036	0.331731	1.14547	0.069438	0.377561	0.726449	0.20936
LOC105260510	0	0.194858	1.2049	0.183041	3.07846	0.160218	0.280973	0.0880227	0.103025	0.0444919	0.0519084	1.48285	0.0402492	0.814086	0.0752321	0.374464	1.07287	0.149227	0.135323	0.269809	0.546286	0	0.0944458	0	0.460875	0.0558834	0	0.00165998	0.289275	56.791	1.14344	0.0386974	0.088419	0.0067615	57.6739	0.255895	0.522276	0.321188	112.173	56.0343	0.205016	0.13712	0.645641	80.9752
LOC109499980	0	0	0.936037	0.265727	1.47265	0	0	0	0	0	0	0	0	0.0712183	0.0271211	0.228569	0.0911319	0.253125	0	0.0334316	0.0382075	0	0	0	0	0.100058	0	0	0	5.76792	1.54014	0	0	0	10.3282	0	0	0	5.52504	8.0387	0	0	0	5.09805
LOC109499978	0	0.085795	0.626969	0.0958392	2.84537	0	0.021098	0	0	0	0	0.170995	0	0.0256861	0.114935	0.0824375	0.992026	0.091294	0.154213	0.0120577	0.0321538	0	0	0	0.212584	0.351854	0.0908642	0	0	15.5375	0.168327	0	0	0	33.6011	0	0.190393	0	56.5723	11.9917	0	0.00672512	0	15.0621
SNCAIP	0	8.66881	0.731419	3.23242	6.4643	1.39022	7.67819	0.0728398	0.0391807	5.35328	0.522821	3.11415	10.1446	0.0341692	0.0255946	3.14944	0.530602	0.372876	1.16461	1.54712	7.3829	0.243889	0.0174918	0.00397844	1.95377	0.0112748	0.00946282	0	1.02823	7.24865	1.17144	1.56793	1.01561	0.25024	5.8397	2.29584	0.113126	1.85629	6.8283	4.41399	1.23535	0.83726	2.63076	3.83348
LOC109500007	0	2.82277	1.70407	1.17092	4.1468	0.0801171	1.62066	0.0130417	0.0350758	3.38914	0.259568	0.455099	0.176667	0.0141441	0.0316444	1.65121	0.0345525	0.347708	0.0743025	0.258943	1.91535	0	0	0	0.195099	0.0993582	0.0667124	0	0.181952	5.64559	0.556136	0.589733	0.418023	0.0736326	3.96727	0.227485	0.0149771	0.301392	0.544606	1.43928	1.40596	0.072212	0.977679	0.3616
LOC111560569	0	19.2312	2.27397	7.10622	17.9168	3.54072	17.2922	0.0945604	0.133216	10.2011	0.932052	6.50197	20.1986	0.142842	0.0669495	8.18137	1.12481	6.99485	2.24291	2.97442	20.734	0.454461	0.0652247	0	3.39501	0	0.138202	0	2.23144	16.3456	2.4578	4.97841	3.01982	0.460726	11.5707	7.16314	0.0620535	6.96661	13.6388	10.5576	3.72166	1.45184	5.44128	5.86597
LOC123385569	0	1.30266	0.257285	0.0393289	0.638307	0.0398041	0.458867	0	0	0.442137	0.0257919	0.327461	0.0666625	0.00658791	0	0.050744	0.00429162	1.40489	0.0474624	0.0321622	0.634291	0.755768	0	0	0	0.0444271	0.0248582	0.0004124	0.0867821	0.524251	0.0552602	0.12086	0	0.00895896	0.516428	0.067812	0.0111615	0	0.324688	0.367345	0	0.064164	0.0869971	0.0746244
LOC109500004	0	0.616829	0	0	0.18184	0	0.0505619	0	0	1.03283	0	0	0	8.241	0.0586051	0	0.0214826	0.455809	0	0.0216724	0.154115	0	0	0	0	0.0864848	0.072586	0	0	0	0	0	0	0.104641	0.54287	0	0	0	0.351144	0.132221	0	0	0	0.0645639
SNX2	1.99083	77.4244	36.8649	56.905	72.0307	24.177	60.4796	40.6592	38.8871	68.4724	40.2596	45.9332	143.659	45.4888	17.3071	88.0976	53.6252	20.8944	47.4878	84.5528	84.1249	172.631	39.3611	5.812	56.3564	35.3606	24.7682	37.9291	64.0567	63.4125	49.0473	51.2148	52.6437	46.0795	79.1136	44.967	49.4724	40.172	70.2275	67.2247	61.6281	48.0023	143.216	65.3054
SNX24	0.377951	6.02235	4.22234	5.35066	12.9924	1.70336	5.93902	3.25009	3.54002	7.25553	4.32574	6.43875	17.2694	3.58538	1.46968	6.52529	3.03103	3.71699	4.99253	7.64056	4.62131	5.52204	3.80491	0.119181	6.2	0.248903	0.20347	0.237077	5.89298	2.87237	2.59313	2.76129	2.99615	2.05229	2.05772	7.94725	1.21605	4.43598	1.29585	1.58251	0.797951	3.61641	5.62066	1.32757
PPIC	47.365	114.878	10.427	7.5315	360.955	27.8865	259.078	59.3624	70.3922	132.609	50.8872	33.4994	254.284	38.3398	29.0371	256.293	40.4508	6.3912	7.19018	137.967	133.47	188.265	65.7439	1.95206	22.8627	11.7831	12.6384	2.53053	11.8351	28.6432	20.6431	26.0415	40.9349	88.6864	39.3078	15.8439	37.3749	19.5453	22.672	34.726	30.0267	102.639	116.561	27.0791
PRDM6	0	3.62502	0.157628	0.148375	3.19004	0.025028	6.36731	0.21542	0.068484	2.1337	0.0648697	0.0588288	0.108982	0.195622	0.0545805	9.30881	0.795668	0.0510389	0.00994781	1.11635	5.45975	11.8724	0.0101431	0.00492859	0.274264	0.0290988	0.0273531	0.00181516	0.0102313	0.356366	0.0912097	0.158897	0.0401807	0.276732	0.506563	0.0213194	0.161417	0.156095	0.311907	0.383126	0.0183005	0.384145	4.51976	0.221578
CEP120	0.0318423	12.7939	7.16221	11.0224	8.33893	2.13987	6.53758	4.14469	3.05254	13.5455	5.40493	8.19863	8.24433	2.70485	2.02796	7.61006	4.61685	3.40462	4.84011	8.90095	8.80646	4.03907	7.36908	0.213993	8.63477	4.0971	2.75236	4.21874	8.30007	49.0379	5.59959	3.68523	4.74188	3.25861	86.3394	7.91388	3.98654	7.22152	80.4387	39.8379	21.2674	4.99576	9.04856	26.1889
LOC109500048	0.0108463	1.26344	2.4883	0.510489	2.53193	0.0303916	1.10065	0.0148417	0.0399169	0.371343	0.334779	0.250026	0	0.0543246	0.799924	2.82835	0.2014	0.891511	0.144956	0.147341	0.811723	0.641107	0	0.0159594	0.177621	0.565357	0.1898	0.039045	0.281608	17.5213	0.485217	0.251673	0.146374	0.106027	27.365	0.0517764	0.213053	0.577666	38.7105	14.7545	1.30356	0.0568928	1.76026	12.0804
LOC109500070	0	0.276551	0	0.0579239	0.0203816	0.00651375	0.119013	0	0	0	0.0168829	0.137796	0.0370906	0.00258739	0	0	0.0124408	0	0	0.0251014	0.0487375	0.00375493	0.00255982	0	0.038069	0.0315046	0.0162717	0	0.0248526	0.602857	0	0	0	0.00293218	1.83896	0	0.0073061	0.294048	1.09416	0.778798	0	0.00429037	0.04271	0.823174
LOC111560597	0	3.07984	0.474884	0.459345	0.437884	0.213472	1.62102	0.0972989	0.0332301	1.73889	0.147545	1.11505	1.59373	0.0778862	0.0339658	0.483811	0.152273	0.00892981	0.87865	0.575551	0.939482	0.183221	0.0391496	0.0124556	0.928784	0.356517	0.15998	0.276614	0.545575	0.770024	0.131718	0.403312	0.495032	0.0822147	1.29742	0.266699	0.289988	1.16091	1.11502	1.18455	1.40135	0.0952178	0.984985	0.635734
CSNK1G3	0.00444056	4.85952	2.60337	4.83997	2.20217	1.08866	2.72233	1.71215	0.497389	5.33847	1.16437	4.21319	4.75015	1.30194	0.634181	2.42224	1.65236	0.417112	2.89267	3.1472	2.7	0.279103	2.12931	0.0971898	3.84401	1.85697	1.32505	2.32962	2.66652	2.50254	1.57127	1.81117	2.23526	1.55363	2.11254	3.66203	1.40331	4.18492	2.76332	2.3431	6.70151	1.35046	2.49857	3.0307
LOC123385613	0	1.40745	1.59975	1.33639	0.497894	0.159122	0.709522	0.0388534	0.0233376	2.12099	0.206212	4.48822	0.506333	0.233547	0.413201	0.270473	0.0882322	0.124805	0.316228	0.318167	4.50359	6.5279	0.177281	0	1.97619	0.0444007	0.198747	0.0340934	1.04077	3.03035	0	0	0	0.402913	8.98711	1.8976	0.0892388	0	5.14384	6.46078	0	0.204099	0	1.77887
LOC123385608	0	0.422234	0.906488	0.280051	0.116694	0	0.14277	0.02914	0.0087516	0.132562	0.115994	1.29737	0.229849	0.113258	0.479895	0	0.0183817	0.0374414	0.426908	0.104477	2.48289	9.99613	0.0137181	0	0.130777	0.172053	0.0186326	0.00412978	0.0813098	3.06929	0	0	0	0.130947	6.43593	0.381215	0.125492	0	3.94802	3.35023	0.6981	0.0506801	0.358649	1.89972
LOC123385610	0	0.905557	0.84734	0.257576	0.0964008	0.0379183	0.208254	0.0462934	0.0110811	0.716024	0.061425	1.83826	0.127009	0.0303372	0.0764776	0	0.0233617	0.0237926	0.00753564	0.103311	0.872387	1.16373	0.0714152	0	0.443221	0.0387955	0.0888021	0.00641936	0.149841	1.34302	0.0263211	0.0628003	0	0.0853452	3.96846	0.831716	0.0132909	0.135137	0.790447	1.45108	0	0.0851137	0.0103594	0.345571
LOC109500076	0	0	0.107019	0	0	0	0	0	0	0	0	0.379439	0	0	0.134303	0	0	0	0	0	0.0152892	0	0	0	0	0.135132	0	0	0.175975	11.1478	0	0	0	0	19.6455	0	0.271596	0	65.6444	13.3254	0	0	0	10.6822
LOC109500079	0	0	0	0	0	0	0	0	0	0	0	0	0	0	0.956855	0	0	0.0517708	0	0	0.0625157	0	0	0	0	0.184181	0	0	0.179885	1.58598	0	0	0	0	8.99197	0	0	0	4.08801	3.19596	0.120659	0	0	0.160413
LOC109492798	0	0.407113	0.122054	0	0	0	0.0600684	0	0	0	0.119296	0.270468	0.0308337	0	0	0.547653	0.011343	0.144402	0	0.0371903	0.806471	0.726334	0	0	0.1345	0.410981	0.172467	0.135432	0	0.196609	0	0	0	0.181292	0.382185	0	1.71656	0	0.166866	0.159699	0.403859	0.0319119	0	0.108663
ZNF608	0.00284111	17.7708	6.82794	10.0246	8.31356	2.59887	7.29858	2.21191	0.981693	16.7275	1.94729	11.1103	12.5592	2.53074	0.922228	8.36994	2.98186	0.697241	4.09759	5.10142	2.79148	1.44485	10.5281	0.0757705	5.96118	0.903351	0.42259	1.91243	8.11232	4.62734	2.73538	1.98503	2.08482	2.82506	5.70137	9.55866	2.80898	6.04077	3.92632	4.28663	9.6919	1.80729	3.68288	2.93016
LOC102899621	0	2.8869	3.34869	2.07314	3.16105	0.466263	2.19739	0.758996	1.66709	6.21501	4.02833	4.74916	5.41411	1.17814	0.501551	1.84928	2.04918	0.950838	2.84164	4.74314	2.66437	3.32619	3.45094	1.06101	2.72503	0.751714	0.291188	0.682757	5.42166	4.48131	0.863088	0.257408	0.748552	0.507233	7.2593	5.29564	2.70207	3.32343	3.19296	4.03122	3.40932	1.07758	1.69847	2.97857
LOC123385623	0	0	0.248165	0.073973	0.0780865	0.199645	0.108563	0	0	0	0	1.52512	0.167179	0.00660857	0	0	0.00922518	0.0313177	0.0793522	0.30712	0.95962	0.0719297	0.0686507	0	0	0.027854	0.0623405	0	1.03377	0.1066	0.069292	0.110217	0.0801288	0	0.284927	0.680247	0.167948	0	0.120632	0.482623	0.291961	0.0484469	0	0.159421
LOC123385622	0	0.300828	0.751582	0.112016	1.41894	0.0283423	0.0739774	0	0	0.75557	0.0367299	0.449678	0.151893	0.0300216	0.0743127	0.144528	0.0593703	0.00889194	0.0450605	0.330301	2.49511	6.78853	0.0891053	0	0.165644	0.121264	0	0	0.0772409	0.292579	0	0.0625873	0.0682522	0.0159479	0.205923	0.627706	0.015895	0	0.0342507	0.325647	0.0828957	0.00393011	0.681403	0.279455
LOC111560609	0.0110354	0.0896477	0.888871	0.106084	0.471671	0.0120249	0.0306395	0.00167781	0.00451251	0.152652	0.106859	0.732865	0.0350992	0.0342319	0.361284	0.0700795	0.0200033	0.00862315	0.0136557	0.0928919	0.806182	2.46132	0	0.000902087	0.120478	0.0594383	0.0214564	0.00056954	0.0580522	0.282512	0.0190792	0.0625921	0.0772206	0.0050264	0.550954	0.105357	0.0221583	0.130607	0.0394432	0.201579	0.19595	0.00988559	0.324771	0.0634578
LOC123385630	0	0.636762	0.556805	0	0.750864	0	0.0260979	0	0.0262649	0.133276	0.310984	0.564049	0.0803779	0.158867	0.223846	0	0	0.0752861	0	0.201355	0.454557	0.752182	0	0	0	0.0446398	0	0	0.163496	0.939628	0	0.0662391	0	0	0.99629	0	0.0672896	0	7.03233	0.818966	0.35093	0.00831886	0	2.11615
LOC109501561	0	0.116593	0.677258	0	0.876471	0	0	0	0	0.951728	0	0	0	0.0698136	0.255892	0.11203	0	0	0	0.0368687	0	0.104482	0	0	0.385195	0.23295	0	0	0.143695	2.41651	0	0.0363858	0.105811	0	0.718294	0	0.0369628	0	10.5932	1.74323	0.578308	0	0.144051	1.67498
LOC123385629	0	0.17252	1.97192	0.12389	0.959046	0.0139318	0.0606068	0	0.0304973	0.371406	0.324988	0.360217	0.018666	0.223205	1.02632	0.165769	0.128752	0.0743052	0	0.0684085	0.0237513	0.0421637	0	0	0.284982	0.0725665	0.0348026	0.00115475	0.136686	1.96883	0.0773666	0.192283	0.201299	0.068986	1.98108	0.0712047	0.0312531	0.827528	0.875481	1.21086	0.896455	0.471378	0.456748	0.679102
LOC123385626	0.020343	0.142137	1.06935	0.148292	0.310704	0.0818636	0.0316557	0.0207293	0.00796455	0.195337	0.1611	0.256563	0.11476	0.210094	0.859647	0.0979211	0.025592	0.0418545	0.0433841	0.334503	0.0913187	0.199252	0.00238307	0.0079609	0.132901	0.0846034	0.0605926	0.000502618	0.19666	0.595767	0.172582	0.0903884	0.0827498	0.0300269	0.774167	0.547535	0.0510121	0.338578	0.142898	0.31951	0.310379	0.0487704	0.149103	0.18611
LOC111560613	0	0.186476	4.4491	0.260383	0.7009	0.158118	0.103177	0	0.04615	0	1.53683	0.495544	0.600236	0.239576	0.0159454	0	0.116901	0.0496069	0.167591	1.22192	0.545813	0.702605	0.0621383	0.0691932	0.154017	0.441205	0	0.00873715	0.229822	1.65102	0.585375	0.465554	0.0846155	0.136423	1.09411	0.942816	0.221689	0.500902	0	0.972346	0.616618	0.202812	0	0.629472
LOC123385632	0	0.176808	3.91662	0.345637	0.860022	0.666311	0.224643	0.113887	0	0.296051	0.496513	1.25294	0.736504	0.308034	3.5025	1.61394	0.16626	0.18814	0.21187	1.48264	0.991865	1.76447	0.0981946	0.113717	0	0.334665	0.561764	0.151876	0.817152	1.83819	0.277513	1.12194	1.28366	0.944817	1.07197	1.24867	0.345656	2.05804	0.201304	1.09216	4.77464	0.315298	1.01942	0.693997
GRAMD2B	0.284161	16.7481	28.2026	33.3414	28.6337	166.574	11.8185	4.24837	0.882238	21.7013	58.5834	69.4172	42.7415	4.51392	4.95556	15.3877	19.2468	0.990728	52.8919	64.902	20.536	28.8844	14.3089	2.83101	65.1878	4.96808	2.97354	41.0581	24.9576	19.641	62.2299	105.35	208.973	60.2105	11.3953	93.5039	16.597	53.9797	25.0649	24.2786	88.5697	8.79695	36.0135	32.8839
LOC111556763	0	0	1.68784	1.25778	0	0.318243	0.276887	0.932481	0	0	0	1.49607	0.213193	0.126413	0.449306	0	0.666644	0.0998438	0.505965	0.435167	0.120566	0.0917275	0.375197	0	0	0.592009	0	0.263779	0	2.49225	1.76728	1.05415	4.59825	0.071629	2.64254	0	0	3.78062	0	1.0137	0	0	1.39113	0.530346
ALDH7A1	0.474327	257.424	94.6567	116.733	163.837	137.419	130.312	108.467	60.1299	235.832	172.582	109.828	366.321	157.25	325.53	122.456	276.88	77.0988	76.733	160.074	326.198	464.831	130.614	10.6028	106.915	25.5597	18.369	64.679	143.876	148.853	158.018	142.786	141.935	83.5983	63.3902	153.449	70.1115	86.9735	89.4782	110.039	136.717	122.006	135.134	115.069
PHAX	1.27821	87.7206	62.1251	123.623	48.5238	20.2144	64.6258	54.0428	37.1403	109.972	35.793	95.3889	103.539	55.4069	12.8191	65.7259	47.1363	24.1368	66.3876	80.8481	59.181	167.41	64.2914	4.2103	90.5088	24.2057	15.5424	70.614	124.553	29.5886	65.3798	61.7896	58.702	52.8504	25.8667	84.0872	51.5712	64.1454	37.4398	30.3325	108.762	54.5942	61.4446	35.1432
TEX43	0	1.27749	1.98027	0.194597	1.95147	0.361071	0.913889	0.224418	0.215563	0	1.40378	0.30862	0.989525	0.834472	0.499842	1.84124	1.85247	1.01952	0.417495	1.50976	5.9069	3.03228	0.0128997	0.0172371	1.05513	0.317522	0.081998	0.535978	2.14696	67.7001	1.04813	0.688614	0.843163	0.576269	95.3962	1.39804	3.01904	2.65163	435.549	98.2605	4.70429	0.769233	5.66767	122.915
LOC123385633	0	0.490155	0.854154	0.301146	0.260094	0.443324	0.132589	0.0270621	0.0242613	0.246218	0.179538	0	0.185616	0.0311839	0.072649	0.235487	0.110961	0.278172	0	0.139496	0.905369	0.870498	0	0	0	0.113395	0	0.00229658	0.0604093	0.858085	0.653936	0.183558	0.0889656	0.0498908	2.78962	0.283225	0	0	0.133935	1.09534	0	0.0422634	0.54503	0.200089
LOC109500113	0	0.0563336	0.161854	0.0681728	0.0498211	0.00530742	0.0554125	0.00518374	0.00464725	0.165071	0.0275124	0.0249504	0.0213328	0.085734	0.0101693	0.018043	0.0385853	0.0516187	0	0.0547604	0.119637	0	0.0041715	0	0	0.05134	0.0265165	0.000879821	0.104143	5.74716	0.0442099	0.0351606	0.0170414	0.0047783	3.8231	0.0180839	0.0416712	0	11.2819	3.11065	0.217325	0.017663	0.208801	3.11334
LMNB1	0.0428266	455.123	14.6182	40.8603	20.5614	44.1117	286.206	168.084	26.9859	505.93	19.6037	24.4093	121.302	90.222	7.60996	52.9945	14.2193	3.1639	9.22739	50.9746	24.2096	0.746632	108.42	0.405966	15.0045	19.2214	13.5905	175.734	62.7658	26.2376	33.8641	78.6571	76.1717	72.8329	45.1147	15.2739	43.1328	15.1878	39.0778	34.7229	458.196	51.1949	25.4711	19.2063
LOC123385640	0	0.228739	0.416362	0.155136	0.346792	0.0184718	0.188839	0.0721655	0.0485225	0.615546	0.059846	0.130255	0.142305	0.0330182	0.308292	0.313982	0.0540579	0.0956215	0	0.0929971	0.146958	0	0.0145184	0.00485003	0	0.103086	0	0.0390419	0.120819	3.03124	0.205156	0.0203954	0.148276	0.0124727	4.14129	0.0314694	0.0155391	0	1.3561	2.79586	0.270133	0.0563512	0.282608	0.581028
MARCHF3	0.10985	3.21598	2.42317	1.55864	5.4777	12.8699	3.04205	13.7584	11.6775	1.85908	19.2465	3.93397	43.4077	6.15461	0.465602	3.79317	7.17185	0.383252	2.78324	7.75891	1.59063	3.04134	11.5802	0.0656639	2.64215	0.794458	0.408479	0.424141	23.603	10.1863	10.2156	33.0612	17.3262	2.23856	5.19152	2.06475	2.34656	2.23964	5.71898	6.30716	0.787723	14.4944	9.124	3.78562
LOC102900144	0.000730732	0.473137	0.649859	0.145409	0.930978	0.102376	0.309804	0.118426	0.0655506	0.500357	1.02822	0.315836	0.96515	0.0962424	0.172929	0.406767	0.0894081	0.115226	0.073244	0.582997	1.61709	0.372169	0.0912775	0.0231842	0.127145	0.0602279	0.0287709	0.00774304	1.2167	1.62215	0.92384	1.14591	0.682083	0.112188	1.56203	0.337924	0.13313	0.192554	0.439199	1.00144	0.169665	0.180246	1.50756	0.276349
LOC111560738	0.143465	4.14789	2.40809	2.3273	5.79785	2.51244	2.26328	4.62652	2.374	5.58156	2.74072	2.55858	10.8842	2.65159	1.14016	1.92178	3.82595	2.02322	3.99446	1.83356	5.74278	6.76641	7.59453	0.142985	2.78441	1.94732	0.810419	2.64645	6.21926	11.4848	6.23488	8.25287	7.68089	3.27745	13.3322	0.856062	1.4735	0.57157	9.12152	9.62846	1.53031	2.73269	3.8439	5.78618
CA1H5orf63	0.15938	25.0633	12.178	15.8213	16.8236	14.8176	23.3883	9.64977	5.77404	21.1043	26.2511	19.6051	39.0911	24.7476	2.69129	25.7362	14.038	6.51488	17.797	44.7121	19.7634	60.0334	28.8476	2.9683	21.3879	3.06308	1.0356	8.42645	33.8396	16.4315	15.6903	19.5722	20.8381	13.7144	11.2019	26.9624	24.0934	19.2819	13.3067	16.5725	21.2156	14.8501	35.1043	11.0147
LOC102900781	0.000615856	0.168737	0.512137	0.231061	0.372344	0.115042	0.132454	0.0795872	0.0663136	0.469618	0.212768	0.482241	0.513781	0.093266	0.0471165	0.388652	0.196688	0.0894063	0.472871	0.452146	0.35029	0.521488	0.135727	0.00383993	0.40833	0.0736986	0.0245533	0.0281688	0.840668	0.361734	0.372334	0.331846	0.277431	0.116433	0.946303	0.467929	0.0555099	0.476625	0.325093	0.390297	0.0546775	0.147868	0.286014	0.15557
TRNAR-UCG_1	0	0	0.521244	0.388431	0	0	0.684073	0	0	0	0	0	0	0	0.158579	0	0.0968825	0	0	0.0977381	0.148934	0	0	0	0	0.292522	0	0	0	0.279879	1.09155	0	0	0	2.0402	2.67897	0	0	0	0.357776	0	0.0272565	0	0.218378
MEGF10	0.327711	29.691	19.5058	44.7591	7.56238	0.914381	4.47878	0.0195242	0.0248437	27.7829	1.93876	13.1715	6.18338	13.7246	0.0205491	0.541469	1.37065	5.10949	6.51827	31.4391	0.847952	0.919955	0.384682	0.0650155	11.0951	0.061897	0.0193301	0.00748272	41.1731	2.85458	0.682168	0.928432	1.087	0.234253	3.3425	32.9265	0.31101	7.06601	3.33526	2.4224	0.392294	2.34586	0.425633	4.06311
LOC123385654	0	4.12851	8.74687	6.06614	1.55592	0.0530405	0.0749901	0.00647556	0.0232215	4.0947	0.378056	2.43112	1.49235	5.59902	0.00802332	0.0225394	0.196072	2.55434	0.653538	1.7588	0.221038	0.322957	0.135488	0	1.00747	0.113468	0.0331246	0.00659446	6.99626	2.32233	0.239319	0.439228	0.276746	0.0805826	3.11049	4.69883	0.0446194	0.882145	3.4773	1.68799	0	0.439457	0.0289818	1.69784
PRRC1	0.024271	14.8856	1.77615	3.7091	19.2299	4.48122	16.3615	15.9481	3.63789	13.1119	4.87011	3.42543	12.6398	8.9182	1.18713	9.77544	5.0403	1.60827	3.47968	7.54504	5.16379	9.11965	19.876	0.289103	3.49162	0.632052	0.350561	4.95005	6.25598	20.2963	7.8717	8.82153	9.6357	9.68527	40.3521	3.29192	3.07884	3.07133	23.6478	11.8444	6.96578	5.43687	5.6433	9.86234
LOC111560755	0.00684639	1.63318	2.11434	0.805572	7.27815	0.119898	0.907556	0.415719	0.167975	3.96878	0.590447	0.422733	0.55421	0.223841	0.203131	1.32471	0.555501	0.545433	0.533741	1.47107	1.78399	0.920113	0.221456	0.00629616	0.753287	0.191813	0	0.0765213	1.38545	2.00168	0.482719	1.16497	1.19342	0.626079	3.60896	1.12345	0.32612	0.712173	0.420188	1.18869	0.981899	0.398187	1.37578	0.426256
CTXN3	0.0028352	1.15942	21.1687	6.84861	8.17198	0.0496516	0.313195	0.00969891	0.00434756	0.617704	0.102953	8.47292	4.92276	0.0144632	0.0190271	0.0843973	2.41483	1.76336	108.356	6.11909	0.132614	0.00858667	0.00780499	0	10.5482	0.0535711	0.0124033	0.00164617	9.27178	0.417115	0.358444	0.0493398	0.0797121	0.562123	1.36053	12.9251	0.492869	9.54368	0.606023	0.517957	2.12023	1.20057	0.564305	0.439919
CCDC192	0	0.0134868	0.621676	0.10546	0.656021	0.0152478	0.00663315	0.00744623	0.0267023	0	0.0197603	0.0358402	0.0204292	0	0.0238338	0.12959	0.0310011	0.217661	1.15755	0.061602	0.125641	0.129649	0.0059922	0	0.267343	0.068075	0.0190449	0	0.191151	25.5157	0	0.101014	0.0244792	0.00514788	41.3699	0.0389652	0.440391	0	57.6287	29.528	0.0891937	0.0594662	0.366587	22.1005
LOC123385670	0	0.0505021	0.85167	0.141036	0.71462	0	0.0124191	0	0.0124985	0.253686	0.0739933	0.134206	0.0191245	0.0113399	0.0230315	0.291155	0.00351773	0.309	0	0.0425856	0.0378539	0.0123427	0	0	0.0834234	0.0743488	0	0	0.186724	2.19503	0.0594502	0.0630418	0.0458319	0.00321275	5.80772	0.0486357	0.0480311	0	3.22569	1.91083	0	0.0267209	0.124791	2.8307
SLC12A2	0.10175	13.0044	49.0446	21.8268	118.407	5.35849	15.0039	13.802	12.2838	12.7669	6.57515	15.2344	15.3077	22.4932	0.354241	11.5553	23.4372	14.0903	17.8489	36.9074	10.9152	2.13669	17.3676	0.112019	14.9214	19.1644	12.7062	3.81264	11.7635	16.1817	13.3144	16.7502	17.0228	15.6872	24.2744	62.9496	5.19509	10.6677	9.74035	8.97357	15.9453	67.9056	20.6902	10.7467
LOC123385671	0.0100765	3.65865	18.3671	6.31877	43.2455	1.39055	4.13619	3.03342	3.47506	5.19048	2.10394	3.6833	2.48252	4.87913	0.146637	3.07154	2.97636	5.97924	3.75946	7.00604	3.46235	0.4598	5.20394	0.00370668	3.88814	8.42994	4.51401	0.832541	3.84736	8.0103	4.57638	5.10874	4.70283	3.47932	13.2389	13.6729	1.07675	3.5051	4.70862	4.52366	4.08773	7.78287	5.19909	3.54264
FBN2	0.000911478	222.242	2.79795	1.39422	116.435	1.92186	135.624	1.08197	0.191483	198.903	15.0348	0.825434	42.9356	1.5583	0.221176	2.28457	0.681137	0.190301	0.152268	14.4459	15.0517	2.56634	6.73093	0.0167645	0.522426	0.424027	0.155512	0.0211688	4.35368	35.3197	0.6072	0.690882	2.84965	2.90868	62.8157	0.331768	1.36608	0.318573	16.462	26.7726	121.133	2.15777	3.24456	11.7966
LOC123385677	0	15.2998	0.130311	0.194215	12.916	0	4.31821	0	0	24.8905	1.01893	0	0	0.0260261	0.0198223	0.501171	0.0484412	0	0	0.109955	0.167551	0	0	0	0	0.146261	0	0	1.28565	7.41678	0	0.217031	0.315566	0.0442414	14.9954	0	0.110236	0	1.30646	2.21374	12.6479	0.0476989	0	0.163783
LOC111556711	0	0	0	0	0	0	0	0	0	0	0	0	0	0	0	0	0	0	0	0	0	0	0	0	0	0.368361	0	0	0	0.704879	0	0	0	0	0	0	0	0	0	0	0	0	0	0.0687486
LOC123378992	0	1.2595	0.251737	0	2.20304	1.17081	0.474916	0	0	0.913875	0.225545	0	0.720737	0	30.0058	0.29583	1.12491	0.173734	0	0.212414	1.89112	1.41142	0	0	0.184938	0.188367	0	0.00917979	0.103485	4.71964	0.812721	2.3933	1.37164	0.0747831	4.9923	0	0.0532391	0	3.11657	10.7579	0.601582	0.638437	0	10.3687
SLC27A6	0	13.5292	0.597876	0.0937971	11.1668	9.80157	4.31296	0	0.0935127	11.4674	0.222982	0.223136	3.26717	0.0408506	91.7742	2.39017	17.1828	0.575183	0	3.06304	7.69748	5.74685	0	0.00623132	0.277406	0.41941	0.0889282	0.0172121	0.232842	18.2435	5.90595	20.4063	15.3738	0.289785	20.2853	0	0.372673	0.112774	29.0959	45.2654	6.09102	5.86687	0.726191	59.3093
LOC123384630	0	0	0	0	0.078852	0	0.131553	0	0	0	0	0	2.32969	0.120121	0.101653	0	0.0124208	0	0	0.657853	13.2036	38.3875	0	0	0	0.187514	0.125903	0	2.58229	0.215291	0	0.111298	0.161829	0	0.313876	0.171729	0	0	0	0.166274	0	0.0174721	0	0.363963
ISOC1	14.8235	89.5021	28.6392	46.8453	45.403	51.9371	56.166	14.2658	18.2182	91.9799	45.0901	24.0428	199.586	36.0906	46.1095	43.8446	67.7497	12.4479	23.8458	65.6858	122.316	485.008	146.212	7.06109	37.6624	102.575	99.4085	36.2934	59.859	91.1606	103.157	59.3481	67.7298	93.9346	69.9821	56.9281	27.5527	28.3842	95.1158	81.6976	37.5429	67.0796	43.1877	164.981
LOC123385692	0	0	1.18482	0.153905	0.487389	0.0327925	0.0427965	0	0.0143568	0	0.0212486	0.173428	0.197711	0.0412484	0.829221	0.111481	0.0161629	0.123457	0	0.0224203	0.296608	0.267013	0	0	0	1.4854	0.757737	0	0.0804321	0.140077	1.09262	0.271554	0.052646	0.0516657	0.374403	0.0838	0.0183907	0.0779127	0.0990715	0.151085	0	0.0193256	0	0.047817
LOC123385709	0	0.254579	0.576625	0.114066	0.462667	0.0142328	0.238721	0.00231686	0	0.635897	0.352503	0.163555	0.653654	0.00795687	0.218486	0.166662	0.0276709	0.228228	0.0829705	0.0306675	1.23449	0.017321	0.00497185	0	0.157123	0.0482461	0.023703	0.00209725	0.187909	0.0821887	0.364453	0.0873052	0.0863214	0.0370179	0.139521	0.121238	0.00620828	0	0.0229332	0.0573893	0.111009	0.0232448	0.51155	0.0197656
ADAMTS19	0.000901999	4.26087	1.23003	0.149397	1.6797	0.0971473	5.18853	0.023528	0.00691573	7.16064	2.48929	0.809423	7.0524	0.00910446	0.0246912	0.762552	0.0679308	1.29298	0.164497	0.204807	3.52542	0.0430257	0.0651815	0	0.383129	0.282683	0.221963	0.000261858	1.06677	0.122019	0.216012	0.0982465	0.33475	0.222922	0.512364	1.93896	0.0279056	0.337779	0.192802	0.190302	0.0277207	0.149386	2.15436	0.187341
MINAR2	0	0.395163	0.201941	0.0601943	0.0317708	0.0406144	0.278275	0.009917	0	0.406024	0	0	0.238069	0.00537762	0.0122873	0.0690361	0.0525479	0.0700818	0.129143	0.0227194	0.637587	0.0834076	0.00798049	0	0	0.0679974	0	0	0.0221372	0.0144574	0	0	0	0.00457067	0.115927	0.0864906	0	0	0	0.0277219	0	0.00422389	0.0443841	0.0112805
LOC109500247	0	0	0.0156835	0	0.111035	0.047314	0.0411655	0	0	0.210222	0	0	9.58802	0	3.25468	0	0.275472	0.014844	0	0.138952	0.07394	0.0511401	0	0	0	0.0506089	0	0	0.477094	0.0168422	0.0656863	0	0	0	0.0368319	0	0.0132674	0	0	0.0188386	0	0.0254233	0	0.0919893
LOC109500249	0	0.0289697	0.499403	0	0.461171	0.0327523	0.131794	0	0.00716959	0.0363807	0	0.0769848	0.307173	0	5.13458	0.0835081	1.06091	0.020551	0.117162	0.171509	0.278408	0.729257	0.0160891	0	0.0478545	0.0715894	0	0	0.0446297	0.09327	0.0454702	0.0180814	0.0262907	0.0110577	0.110484	0.139496	0.0321443	0.194543	0	0.0484369	0	0.159809	0.178961	0.0204679
CHSY3	0	5.28552	16.5236	2.28198	8.09974	1.48532	23.5771	11.9244	11.2729	4.04362	0.934631	3.32984	302.888	3.22738	1.64009	2.05774	4.00959	0.347478	6.79776	8.72665	6.47608	1.87703	29.6379	0.0360687	8.22925	0.255543	0.235923	0.0185025	14.0859	2.65281	1.7045	1.27977	1.24053	0.703407	1.5194	4.34421	6.13918	7.50684	0.518776	0.9269	0.251115	3.67075	1.20097	2.04126
LOC123385730	0.00528849	0.0655352	5.57506	0.183019	0.695507	0.111138	1.19258	0	0.032438	1.8106	0.168033	0.261232	0.297808	0	0.418422	0.692676	0.031954	0.122037	0.235593	0.0529595	0.115787	0.0053389	0.0145586	0	1.29907	0.0206744	0.0462716	0	0.585575	1.4374	0.102862	0.102259	0.148687	0	1.44193	0	0.322031	0.528113	0.559611	0.678514	0.541763	0.00128426	0.080969	0.226367
LOC123385744	0	0	0.974219	0	0.399839	0.127784	0.528097	0	0	0	0	0	13.0545	0.0338389	0	0.217206	0.291296	0.0400902	0.507899	0.285926	0.393338	0.0828704	0.728155	0	1.12023	0.0831982	0	0	0.487548	1.9332	0	0	0	0	2.48685	1.30619	0.17916	0	0.772114	1.30831	0	0.0885966	0	0.443645
LOC123385741	0.0133807	0.290175	0.132047	0.0231533	0	0	0.132521	0	0	0	0	0.0550798	0.0863387	0	0.131153	0	0.0519741	0	0	0.0196624	0.977643	2.7236	0.0414401	0.018458	0	0.14603	0	0	0	2.92366	0	0	0	0.00527423	10.4889	0.239529	0.0131418	0	0.807065	2.17392	0	0.00324937	0	0.380745
LOC111556990	0	0	0	0	0	0	0	0	0	0	0	0	0	0	0.108703	0	0	0	0	0	0	0	0	0	0	0	0	0	0	0	0	0	0	0	6.7129	0	0	0	0	0.613124	0	0	0	0.149694
HINT1	57.6007	143.088	338.988	230.64	173.492	74.4211	178.258	476.313	410.571	133.68	213.314	392.341	757.285	463.421	248.56	240.208	536.619	202.246	494.039	410.386	272.963	928.427	498.823	43.5814	394.347	188.649	139.552	664.329	207.096	397.349	162.167	130.465	117.361	489.787	356.647	190.345	332.741	259.957	292.446	494.086	123.508	472.458	92.9972	472.088
LYRM7	0.206477	24.2885	20.1928	32.2285	13.5606	1.87532	11.2995	6.19082	9.8415	31.195	30.1653	35.9888	26.869	13.4071	7.41061	10.6296	29.3638	14.9302	40.5464	17.5533	6.75948	9.94099	14.9486	2.22554	35.9158	9.06102	6.29198	6.63285	17.8579	32.7266	10.7389	3.55017	5.94172	8.62986	59.9434	30.9101	8.02013	26.4054	53.8035	23.0018	18.0205	11.8984	8.55396	30.643
CDC42SE2	2.25424	7.17339	10.5375	9.77502	3.94168	1.58487	5.0945	4.49528	3.51572	6.61304	2.98095	15.9464	14.9174	4.15841	0.753227	7.48993	8.20761	1.15274	15.0717	10.7778	10.0034	11.9841	5.66529	0.451381	15.6135	12.2421	9.3842	10.7465	5.04016	12.8492	2.32406	2.00817	2.42147	20.6147	25.2902	8.10911	6.72594	11.4761	16.5669	14.6414	16.606	5.09285	3.77573	16.1344
LOC123385747	1.63008	7.13769	10.8472	10.0098	4.76394	1.93195	6.56964	2.99152	2.31904	7.68753	2.94673	15.8984	11.0861	3.02818	0.797951	8.37531	5.82089	1.28894	16.6912	9.61404	8.46973	9.9691	3.77897	0.523959	16.0712	9.08529	6.61357	7.34148	5.22828	10.4642	2.3786	2.38111	3.13351	14.2098	21.6369	7.99811	7.9834	12.4483	15.8841	12.2905	17.4226	4.4608	5.36504	11.2469
RAPGEF6	0.010716	3.57565	6.07843	2.96487	2.75916	0.893191	1.70404	1.38443	0.420323	4.3418	1.43026	3.92096	1.76543	0.699431	0.659326	1.96457	1.13221	0.757266	3.80482	2.84333	2.34335	0.890047	2.03397	0.0691397	4.20435	1.76833	0.943172	1.2172	2.84376	4.51435	2.06815	2.12962	2.15966	1.12003	7.90399	3.31435	1.14768	3.88762	3.40233	3.64264	5.92705	1.38138	1.99093	2.67768
FNIP1	0.0569457	8.37357	16.8213	15.8027	12.1085	2.60981	5.10917	10.6821	7.12064	7.7107	10.6254	12.0993	16.2927	6.91383	3.64771	7.32695	9.032	10.5881	11.7385	16.2289	9.69865	1.17492	9.37373	0.483479	14.0091	3.02324	1.75943	4.33784	19.2248	26.1104	7.08325	6.80331	7.98804	4.8199	35.3446	13.0974	3.36771	11.3944	14.066	11.9949	10.7714	7.72346	12.9145	9.09953
MEIKIN	0	0.060427	3.63884	0.97877	0.0267206	0	0.0668689	0	0.0037387	0.151771	0	0.361305	0.260294	0.00226141	0	0	0.0220975	0.0542532	0.414094	2.21918	0.800313	3.36963	0.00335597	0	0.661295	0.0571887	0.00533312	0.00247735	2.35289	7.07975	0	0	0	0	15.303	0.789254	0.0191568	0.415936	7.75794	6.72598	0.0624418	0.0365608	0	3.51686
ACSL6	0	1.78693	40.7549	27.0588	0.62959	0.0391015	0.683239	0.0190952	0.047077	1.61427	0.0591189	24.2505	8.55355	0.0291223	0.0052576	0.0443096	1.73835	0.564049	36.7869	18.0024	0.648556	1.53064	0.805457	0.00769998	26.1043	0.0230338	0.0101748	0.000810241	29.8057	16.4678	0.122141	0.0503689	0.047081	0.066373	25.4891	26.9972	0.109645	20.3999	21.314	19.2384	0	0.711024	0.0142436	17.9259
LOC123385772	0.00238899	0.0111017	0.0305098	0.0144683	0.0720005	0.00836748	0.0273004	0.00306468	0.00549501	0	0.0216875	0.00491698	0	0.200047	0.411046	0.2169	0.0136614	0.00525033	0.0399096	0.0296445	0.155528	0.131743	0.110981	0.000274624	0	0.0622621	0	4.78291	0.00912152	0.627729	0.0348499	0.023097	0.0705253	0.0701537	2.17015	0.035638	0.00997191	0	0.638308	0.751992	0.208023	0.0145036	0	0.150772
LOC111560806	0	0	0.0895066	0	0	0	0.117467	0	0	0	0	0	0	0.0715061	1.37855	0	0	0.042358	0	0.1007	0.249352	0.131337	0.0132645	0	0	0.11302	0	0.0251789	0	1.08135	0	0	0	0	7.21694	0.690038	0	0	0.815789	1.54359	0	0	0	0.290619
CSF2	0	0	0.0175956	0.0917856	0.207621	0.0530826	0.0230922	0	0	0	0.206376	0.0623858	0	6.56655	0.469737	4.84983	0.07195	0	0	0.0626875	0.0754135	0.0459002	2.63368	0.017422	0	0.0740599	0	211.719	0	0.566871	0	0.0879155	0.127831	0.221032	1.62535	0.0904339	0.0967522	0	0.272632	0.537445	0.0776283	0.331235	0	0.0810895
LOC111560818	0	0.0393822	0.162346	0	0.0348294	0	0.033896	0.0108717	0	0	0.0144252	0.104655	0.0559259	0.118643	0.783516	0.037841	0.105612	0.0279376	0.106182	0.106545	1.42113	1.44535	0.0196847	0.00584524	0	0.0869673	0	0.00092261	0	1.13718	0.0618134	0.0491608	0	0	4.84088	0.0758536	0.0124851	0.0528934	0.726384	1.59899	0	0.0258537	0	0.383362
P4HA2	0.00159786	7.56885	3.33921	1.90637	15.4847	4.11066	14.7173	51.5797	24.1094	4.40753	13.3297	3.84777	23.7715	24.1383	2.82813	20.2388	7.13111	1.99023	1.83961	20.8494	10.205	22.4672	97.9581	0.199477	1.98704	0.179068	0.101358	2.60558	3.05654	5.74994	5.22318	4.60977	4.87652	2.76383	4.93319	7.08175	1.33942	1.60894	4.4333	6.30955	2.34483	17.2077	5.11602	4.32518
LOC109500470	0	0.455039	0.594868	0.289619	0.664483	0.511462	0.500946	1.03852	0.865568	0.332236	0.18218	0.302308	0.98181	0.430088	0.563442	0.503325	0.10725	0.153895	1.59303	0.117864	0.622093	0.627178	1.43755	0.0188479	0.445757	0.133536	0.0224151	0.0158664	0.176069	0.966748	0.265756	0.171728	0.153659	0.35074	0.859943	0.331215	0.387484	0.206086	2.28438	1.35763	0.0699849	0.428438	0.424921	0.766776
PDLIM4	0	40.3041	9.86235	16.6884	36.8532	45.367	51.7766	75.264	35.5479	36.0569	1.94589	24.9912	72.0922	2.00766	0.728226	38.3433	10.1462	2.64677	113.801	28.4912	35.3872	41.1585	45.6137	0.660876	17.5765	0.11302	0.108408	0.330922	12.6216	15.8927	13.9775	12.4198	16.0521	8.58376	12.7112	39.2287	53.6844	23.488	19.5929	19.4136	11.4235	51.0587	70.0179	15.4909
LOC101095395	0.0210809	0.38369	1.58858	1.22655	0.696715	0.494934	0.698782	0.0638449	0.0363668	0.440836	0.166437	1.27182	2.17741	1.55282	0.395221	0.249051	1.19438	0.407921	0.297143	1.26238	0.397808	0.223626	0.0787442	0.0826965	0.812489	0.287154	0.103752	0.11711	0.5584	0.794249	0.661493	0.409307	0.52972	4.23164	0.917257	1.9812	0.12358	0.82781	0.200764	0.612954	0.539892	0.799225	0.421098	0.702174
LOC101084417	0.00416249	2.24058	5.31441	5.68373	2.12269	2.4124	3.6309	0.527456	0.273666	2.67206	3.87835	6.61278	9.65031	6.14867	1.13958	2.51301	1.33558	3.48095	3.3711	8.20431	3.80381	2.08947	1.91835	0.306118	5.46788	1.40977	0.951464	0.899031	3.17264	5.20951	2.34219	2.37169	2.82187	13.8562	4.76385	7.11912	1.27985	6.35413	2.50182	4.23889	3.57654	3.175	6.35005	2.88827
IRF1	8.37134	10.9104	15.7182	10.889	42.208	25.8663	16.1273	28.4893	25.8581	6.96302	29.6559	33.0732	69.7183	139.25	27.3135	134.222	41.229	11.2343	22.2096	63.0391	151.077	99.6627	81.3012	0.964532	26.2953	134.472	107.51	212.943	31.9814	17.3114	32.4479	32.5647	46.91	283.322	82.4319	22.2201	192.051	31.7892	6.51644	18.8851	241.255	83.5521	96.5685	12.1712
IL5	0	0	0.950541	0.550932	1.43315	0	0.0866302	0.0194498	0.0348738	0	0.412916	0.187232	0.0533618	0.0474612	0.168691	1.08318	0.196305	0.449832	0	0.227745	0.279141	0.126276	0.0626074	0.0209147	0.640118	0.296357	0.0497461	0.0396139	0.347335	2.87319	0.331759	0.307826	0.639407	0.331679	5.80109	0	0.134018	0	4.20324	3.65185	2.21328	0.056139	0	2.12756
RAD50	0.173265	21.7209	9.50324	16.1521	8.43375	4.44031	9.117	10.4113	2.91337	27.8848	6.31893	8.75167	14.2102	7.25694	1.82568	9.32302	6.15836	3.97062	10.7161	11.1908	20.4582	24.3789	11.7442	0.27477	10.8685	4.01937	2.25396	7.95236	15.7961	14.7581	9.72642	11.8985	15.2315	6.16979	22.6981	12.1319	4.48716	7.7756	17.9749	12.9763	24.167	5.50849	13.0165	11.4772
KIF3A	0.00269086	8.14374	25.2283	38.2408	2.69762	1.09516	3.01097	2.06633	1.33834	8.37091	1.68003	30.7363	4.4196	1.65216	0.28941	2.36057	3.09986	0.610003	23.7054	11.2768	5.05428	4.24808	3.00213	0.127813	39.9663	0.415517	0.218956	0.750089	18.0545	13.8095	2.22567	2.421	2.61611	2.07473	31.041	27.1185	0.792753	28.4453	26.0336	12.3298	2.42991	1.57477	2.87666	9.66883
IL13	0	0.033745	0.238174	0.113087	0.216368	0.076302	0.0439084	0.00465775	0.00104392	0.127133	0.0185406	0.067256	0.0926463	0.0282565	0.00240459	0.0689018	0.0258556	0.00897696	0.3576	0.0680762	0.068803	0	0.0135873	0.00125213	0.0139356	0.0239524	0.0119129	0.186569	0.0788372	0.785226	0.039724	0.0842476	0.206714	0.0301883	1.62188	0.14624	0.0285234	0.084979	0.353475	0.742107	0.516078	0.025294	0.10423	0.250007
IL4	0	0.33397	0.417192	0.186534	0.0984537	0	0.0547516	0	0	0.279604	0	0.147917	0.0843136	0.0416614	0.0190384	0.213934	0.0465255	0.0789725	0	0.0704046	0.107283	0.0362764	0	0	0	0.327779	0	0.00521596	0.274402	4.74897	0	0.0694825	0	0.113311	17.2437	0	0.141169	0	1.21677	4.14499	0	0.0218155	0.275081	0.45444
SEPTIN8	0.00295004	26.9224	60.4978	97.5031	26.0231	21.2262	16.1979	16.2281	13.3901	23.953	16.7407	71.0488	35.3097	7.86603	1.02928	16.7535	8.52262	2.29154	69.7213	90.9937	13.0938	1.95993	27.3321	0.39989	97.6727	0.299849	0.144544	1.47331	48.3584	5.5649	21.2618	37.9887	35.9317	19.2022	1.93472	165.681	2.84116	88.2186	1.2112	3.24292	1.76489	7.11159	8.36933	2.06112
LOC123385800	0	0.582802	100.967	131.834	4.71246	1.27073	0.941805	1.2641	1.19509	1.35923	7.68504	107.196	14.5662	0.361433	0.313248	4.71995	7.08675	0.841641	105.355	33.1023	4.61801	1.77028	0.980268	0.074144	121.234	0.280162	0	0.0975238	26.6275	2.44598	2.87493	3.2738	2.64453	1.14405	2.73559	56.3669	0.712654	135.192	1.47876	1.5259	0	0.730935	3.90887	1.04575
SOWAHA	0	0	27.9652	109.967	0.242531	2.10139	0.0674376	0.0210289	0.0433608	0.0382654	0.022322	42.8752	2.93085	0.0843836	0.0668748	0.204946	4.12493	0.0432313	36.894	6.50702	2.33286	0.748418	0.0981508	0.300748	52.6489	0.0769001	0.0430278	0.00856601	16.8521	0.067445	0.836951	2.61499	2.01865	52.6328	0.375438	16.829	0.0676191	60.7316	0.104076	0.157737	0.151135	0.49859	0.207055	0.090897
SHROOM1	0	2.29256	2.0834	3.63676	1.39318	0.371354	1.71878	1.10846	0.563504	2.3992	0.841374	1.50823	3.62243	1.78516	1.13061	2.63225	1.03226	0.10977	1.69289	1.49872	2.19189	0.683171	6.55528	0.125694	1.35093	0.030076	0.0157766	0.181853	1.15662	0.401965	1.16087	0.205012	0.28998	0.552955	0.313336	2.621	0.241557	1.46452	0.109903	0.293778	0.0517209	1.74231	2.97326	0.12349
GDF9	0	0.830727	0.324975	0.557603	0.505904	0.547863	0.580602	0.0985704	0.128045	0.704645	0.571202	0.803641	1.159	0.414791	0.244883	0.777211	0.191358	0.200315	0.700753	1.00109	102.942	245.426	0.505882	0.0800362	0.914839	0.15249	0.0463058	0.0974781	0.767873	7.97242	0.468942	0.354761	0.611721	0.509933	13.9982	0.424575	0.284152	1.36041	16.6514	8.18592	0.915654	0.54807	1.32347	4.9666
UQCRQ	15.8268	171.61	209.293	180.695	73.4032	136.252	155.028	207.775	177.993	216.662	960.842	247.504	591.517	666.564	230.873	179.094	343.03	493.664	194.282	104.921	383.297	1962.52	498.592	29.0246	286.318	46.8496	37.1265	533.67	191.664	260.419	121.552	77.3655	104.537	494.64	250.446	254.467	130.418	328.496	179.643	219.852	200.771	252.891	181.594	185.258
LEAP2	0	9.23689	9.12456	17.5863	9.32434	1.77225	5.80716	6.27936	2.78449	12.3513	8.29171	6.84207	6.07983	11.9341	56.488	9.79859	18.9086	2.96019	6.726	9.74626	6.56344	0.062479	6.26077	2.2691	6.77988	1.46939	0.833073	1.46421	12.3396	7.50592	5.94603	5.29178	5.07857	11.8177	7.92663	7.45082	1.8489	5.72753	3.46012	4.65045	12.903	3.13465	4.72212	2.87226
AFF4	0.00591383	25.8159	27.7785	39.2145	27.0521	9.09648	15.8049	34.1826	14.9205	24.9157	19.6238	26.4988	28.8121	11.2377	3.81859	16.9361	12.9837	9.80679	17.9191	26.3761	10.945	0.386046	32.3323	0.342776	25.1716	4.74543	3.21925	6.09064	35.9435	22.4621	18.8603	17.958	18.1691	10.4952	18.8565	25.9882	5.11908	24.1278	11.2248	11.9517	21.5329	14.594	16.2164	12.3391
LOC123385824	0.0311291	4.92221	12.6406	19.7315	10.2211	3.33632	5.16046	7.41805	1.95901	5.08657	7.79957	10.7944	13.4481	2.69497	1.75746	4.28479	1.43215	3.91185	22.1533	6.08524	3.53909	0.960373	3.52035	0.316046	11.0876	2.95796	1.64507	1.72752	12.9505	6.06696	6.89023	4.82016	5.32121	3.26874	6.83074	7.43736	1.84173	12.8488	2.79329	4.50984	4.91093	3.66721	5.10914	3.4595
ZCCHC10	0.253623	13.8288	9.71704	18.3734	13.4114	4.72288	14.0728	15.2484	8.05694	16.7415	21.1534	14.2506	29.7644	12.894	1.92154	16.1062	12.7958	12.0071	10.71	24.4926	13.0752	47.4725	18.7989	1.30614	11.9842	9.96999	5.28878	13.5281	22.5872	18.0083	15.0252	13.8296	15.117	9.72371	27.3379	10.4171	19.1055	10.5881	19.5198	12.6319	46.4204	17.5438	22.1659	15.8276
HSPA4	0.0542623	56.5753	46.3562	56.7662	20.6793	15.5325	33.1158	94.0303	43.9789	53.4903	45.2134	67.8877	39.0232	53.0585	5.5616	24.0156	23.4101	22.3155	29.5121	46.4016	31.1923	15.6465	131.262	1.03569	48.2131	9.65851	6.65794	38.6442	52.4062	35.1095	23.7419	30.9562	31.4618	27.3005	55.6484	50.9717	17.07	40.3802	59.2712	43.6204	42.7707	22.1761	27.0317	37.1369
LOC123385834	0	0.0317299	0.362675	0.0177223	0.0561234	0	0.0331618	0.0656941	0.023558	0.159388	0.0232445	0.0421598	0.0180236	0.0213741	0.0054264	0.243905	0.0342573	0.0337636	0	0.0312153	1.71918	2.03303	0.0422927	0	0	0.173503	0	0.0208134	0.0391055	0	0.0311265	0.0198042	0.0287956	0.0373428	1.17287	0	0.426255	0	0.0216755	0.0346877	0.104921	0.0245608	0	0.0149453
FSTL4	0	3.01912	5.14367	22.122	1.42633	0.214913	1.20123	0.000949795	0.00617334	2.31808	0.126025	7.30534	9.30016	0.0124897	0.00470724	2.20176	0.307357	0.00839005	6.39612	2.22768	1.81536	8.2925	0.0309552	0.000510663	9.27394	0.0520993	0.0157901	0.0256317	8.35033	3.58936	0.145132	0.0837502	0.1811	0.0840487	0.400712	6.55232	0.356538	5.67225	0.815575	0.902551	0.412416	0.389437	0.350696	1.1471
LOC109500548	0.00893299	0.968608	3.54954	1.11292	0.624116	0	0.19736	0.00763971	0.0188349	0.764591	0.0608211	1.13991	0.25152	0.039356	0	0.678083	0.0212044	0.00490805	0.522309	0.587784	7.75064	7.79337	0.0153697	0.00410754	1.46288	0.157148	0.0390796	0.00129666	1.92707	0.684956	0.0977338	0.302278	0.138134	0.333623	0.243563	1.33259	2.63862	0.278768	0.189052	0.344365	0.388923	0.0878563	0	0.102109
LOC109500552	0	0.705122	8.32385	0.787672	0.415737	0	0.115599	0	0	0	0	0.468452	0	0	0	0	0	0	0	0.0330328	0.100671	0	0	0	0	0.0741482	0.165952	0.00550631	1.5208	3.92553	0.184457	0	0.213305	0	3.17184	1.24495	0.149027	0	11.6408	3.13632	0	0	0	0.977925
CA1H5orf15	5.39528	98.4993	20.3294	60.4178	175.044	26.0819	76.9127	47.5177	41.8447	91.4104	48.7863	44.7324	182.262	44.7651	12.5728	75.8168	38.0184	11.8282	37.0998	88.8231	48.7592	138.353	139.27	5.34815	42.4803	23.263	14.0578	29.0215	79.361	50.0589	50.5708	34.1783	45.3994	33.7067	68.7108	68.2504	53.6815	33.912	102.598	43.3707	94.8204	54.8657	60.9782	48.0096
VDAC1	19.5109	205.396	285.131	372.958	126.286	130.041	141.759	203.357	88.6787	204.975	698.655	401.612	411.458	171.312	53.0384	106.414	185.905	591.887	389.979	290.796	91.0025	137.682	364.332	6.55875	464.524	29.1384	18.1376	181.33	542.221	90.3852	208.089	162.447	180.054	173.555	22.4761	222.901	64.7271	330.516	55.1063	70.5438	301.995	228.696	75.503	75.0691
LOC111556759	0	0	2.796	0.961648	5.07562	0	0.705658	0.158431	0.284069	0.720726	0.840866	0.762561	0	0.257734	0.687045	0.551451	0.119927	1.83208	0	1.33085	1.22907	0	0.382482	0.0851816	0	0.844906	0	0.591581	0	1.38581	3.15278	1.43282	1.56251	0.803218	1.34693	0	0	0	0	1.18101	11.3865	0.134959	0	0.270322
TRNAN-GUU_1	0	0	0	0	0	0	0	0	0	0	0	0	0	0	0	0	0	0	0	0	0	0	0	0	0	0.510912	0	0	0	0	0	0	0	0	0	0	0	0	0	0	0	0	0	0.127138
LOC109492805	0.0147914	0.0458238	0.0343456	0	0	0	0.0225373	0	0	0	0	0	0.0694117	0	0	0	0.108523	0	0.0102958	0.104652	0.0294405	0	0.0407191	0	0	0.346945	0.647085	0.0665581	0	0.092208	0	0	0	0.139926	0.107545	0.308912	0.290545	0	0.062607	0.14734	21.8197	0.0323275	0	0.107919
TCF7	0.111466	17.9567	7.17645	5.45309	11.2998	32.7412	16.1886	7.53958	0.691465	19.909	6.30136	11.5125	49.2226	2.15935	2.88839	37.1021	8.926	1.90408	9.62085	11.5257	28.4148	5.57014	9.97968	0.561461	8.86757	27.2874	18.1145	27.4813	11.2588	15.944	25.8439	42.5578	44.2161	18.557	32.2428	15.1466	97.9255	10.4986	22.5819	17.7855	3715.21	9.68554	122.758	6.55539
SKP1	190.667	440.637	904.97	893.582	216.452	155.784	208.283	277.37	288.511	468.083	525.722	987.945	1229.5	293.209	90.7435	302.666	412.266	259.053	931.791	1227.56	764.008	2470.19	378.725	16.1463	1150.61	137.287	105.167	209.509	614.483	313.723	277.514	298.542	289.01	204.532	335.456	1107.28	170.397	933.228	350.268	424.852	417.349	435.281	304.406	418.497
PPP2CA	26.7953	174.828	160.104	255.865	62.8471	113.849	136.113	73.1899	55.5447	209.847	144.854	248.022	221.314	92.3266	23.2605	89.7888	97.1645	56.1852	208.238	183.153	91.9536	287.726	150.175	10.6998	285.051	72.5154	60.3609	129.076	182.566	96.8202	115.408	162.976	185.276	105.616	110.452	243.554	86.889	257.797	115.081	89.6443	281.288	107.758	110.659	104.514
CDKL3	0.000926751	0.0229687	0.199052	0.0352793	0.0660183	0.0340826	0.0240052	0.0174368	0.047607	0.0576889	0.0357559	0.103001	0.247348	0.0301925	0.00949284	0.0634507	0.0605617	0.0463358	0.170301	0.236655	0.138344	0.130105	0.0599543	0.00681817	0.0995963	0.0374373	0.0243258	0.0131832	0.797041	5.45369	0.069849	0.170239	0.192813	0.028493	15.2433	0.0387097	0.0582529	0.0154244	10.7078	6.05982	0.151901	0.0423099	0.0922282	4.60898
UBE2B	264.163	77.2349	68.0943	133.216	64.2259	36.6801	60.7907	42.963	57.5571	82.8212	184.914	119.161	196.641	53.0734	24.7531	94.1448	150.396	185.679	133.845	145.271	91.2086	336.001	63.1986	7.17266	131.256	53.3342	35.1167	57.9801	111.52	115.048	105.116	80.8442	100.56	61.847	164.42	80.6455	62.9863	137.478	126.541	100.063	175.795	138.06	139.753	100.898
CDKN2AIPNL	4.74726	43.9221	24.285	22.4665	20.9317	25.4717	40.1399	39.5474	21.7965	46.8701	9.50284	26.6096	88.8947	44.8597	23.3858	26.295	33.4275	13.218	32.9802	45.6166	72.4779	271.812	36.2359	3.83375	23.4015	16.4227	13.0353	90.8281	27.1185	30.5099	33.7328	29.6333	29.095	58.0112	35.835	21.6426	39.4102	31.8642	17.8588	28.0218	30.7124	61.3629	44.0735	18.4058
JADE2	0.00250139	0.213964	4.59487	5.01039	5.20547	3.31172	0.285005	0.696525	0.373658	0.0871551	1.8307	2.50764	5.79457	0.849762	1.24115	5.47319	2.20552	0.359274	6.03438	3.56253	5.02323	0.151559	2.76844	0.0493458	2.27789	2.19863	1.37881	1.83848	6.95256	4.18202	5.7901	3.57149	2.77948	1.57123	3.95015	3.58301	3.58777	2.24554	2.89256	3.53978	2.60556	3.14391	7.87671	2.29389
LOC102899549	0.00371932	0.0145547	0.57772	0.4295	0.902655	0.249912	0.0332566	0.114845	0.0645373	0.0144701	0.382071	0.269135	0.638437	0.202671	0.276362	0.906119	0.230741	0.0672205	0.358085	0.234831	0.59671	0.101823	0.166112	0.0106213	0.323573	0.305084	0.168277	0.283747	1.28929	0.751222	0.910933	0.479198	0.382503	0.416507	0.82764	0.500517	0.416431	0.346164	0.235725	0.408434	0.223595	0.305507	0.907362	0.219663
LOC111556716	0.0356652	0.276228	0.621109	0.206739	0	0.833826	0.135856	0	0.136725	0	0.607074	0.734054	0	0.24107	5.33435	0	0.0192407	0.489888	3.2273	0.958884	0.394572	0.135019	0.122728	0.0409986	0	2.20759	0.78013	0.232963	0	1.334	0	0.137926	0	0.14058	0.324143	0.356466	0.92825	1.48398	0.2755	0.319741	1.21482	0.129914	0	0.5612
SAR1B	1.82038	33.5944	35.0612	55.1464	31.9124	15.5235	22.4357	35.4739	35.1951	45.3339	66.1135	50.5875	53.5372	39.4194	38.7358	31.0107	49.842	78.4843	36.4135	44.6797	16.7037	52.3592	51.553	1.96248	54.4657	14.3829	10.9005	28.2519	55.6599	41.079	48.7856	31.7409	42.9418	72.1192	56.2825	94.734	17.845	47.75	60.2508	30.3436	56.7731	28.6042	29.8963	34.7503
SEC24A	0.0252105	6.71922	8.1468	7.40652	14.7456	2.88742	7.16899	7.01418	3.5875	9.13223	3.51922	5.12811	7.49694	5.39403	5.49485	5.80048	5.67207	2.8617	4.30444	9.49332	3.62184	2.36585	9.09324	0.462619	5.32736	3.48534	2.26009	3.77754	16.7977	11.551	6.84888	6.80667	8.76293	9.45053	12.0852	4.92029	3.11371	4.70587	5.33868	4.73394	12.6171	4.98765	4.77135	4.62581
CAMLG	3.31726	44.684	54.9047	88.9703	42.3539	24.8874	28.9316	30.0438	24.0808	36.4979	37.1311	74.8296	168.753	36.5493	10.3367	37.0895	45.9454	33.1239	82.959	106.598	125.76	288.891	51.0847	7.98053	90.3812	20.5244	14.1639	39.1077	112.928	46.7853	36.6644	33.7907	32.1392	46.3345	50.9155	55.3842	25.569	63.658	63.8017	46.6897	27.6618	54.1734	36.2631	50.3359
DDX46	0.185957	66.0698	18.6938	37.8905	34.8112	10.5897	34.5972	20.9353	5.50906	78.998	18.7023	23.5624	43.4387	17.39	5.24374	30.9736	14.8184	8.79805	26.324	30.1337	26.3062	11.958	32.6446	1.40976	25.902	8.68174	5.67808	37.9	39.4759	27.0607	22.9017	28.9043	33.9595	24.3829	45.9322	19.1845	15.5825	19.9523	36.3382	27.6496	95.6114	19.7501	34.7394	22.5259
LOC111556980	0	0	0.615358	0	0.968128	0	0	0	0	0	0	0	0	0.163868	0.499229	0	0	0.582422	0	0	0	0	0	0	0	0.345339	0	0.307742	1.34914	1.7622	0	0	0.993449	0.0696393	2.24799	0	0	0	0	1.12633	0	0	0	0
CA1H5orf24	0.2727	35.9982	21.2285	54.3657	20.9694	10.2322	24.5328	9.98054	11.0919	34.3577	17.8081	25.0632	54.6087	14.2438	5.1771	26.4621	21.6841	8.09703	28.4116	35.4139	12.9079	15.4074	27.82	0.687416	29.9379	5.12147	2.7872	4.32746	46.2826	14.7524	20.4073	21.4184	27.3571	11.517	16.2441	31.9873	11.9432	24.267	13.7256	9.10937	25.8989	27.2283	25.0509	14.3031
TXNDC15	1.52598	68.2652	73.9422	131.549	127.001	59.5087	46.1998	59.3226	44.0103	65.5907	82.0238	142.288	323.974	68.2913	39.5751	78.6216	63.4235	37.4405	109.584	121.489	87.072	212.273	115.57	17.8982	137.568	17.4552	11.9763	22.0825	125.956	127.034	81.6517	60.412	65.2988	57.185	106.308	108.484	45.8492	108.524	135.819	108.262	50.5553	82.8657	77.0292	81.5873
LOC105260556	0.267802	9.85213	17.6251	20.4182	15.9588	8.96943	7.21727	8.25941	10.4588	10.4189	9.76253	20.0493	56.454	14.1084	7.83329	13.0041	16.6398	10.6307	15.8447	23.0303	15.4995	29.4933	10.9317	4.57926	20.7286	5.30004	3.69775	5.57215	17.8939	15.745	10.8246	7.94541	11.7175	8.1544	21.0078	13.433	14.0222	19.1518	15.7984	14.9732	14.1457	23.1711	16.785	14.9609
PCBD2	0.0674951	6.67031	6.72344	13.5126	4.39202	6.38878	5.76166	6.23413	3.76735	13.0377	8.50161	7.00143	15.9832	6.97863	4.0403	4.59097	4.36147	5.70535	3.31687	8.6566	15.719	25.7214	3.97394	1.25693	6.45914	1.33249	0.693894	6.36526	10.0828	16.1319	4.53736	4.71141	4.70614	3.15793	22.3758	9.01144	6.25942	6.45928	26.9865	16.7134	10.1813	8.27025	11.1734	11.1781
LOC123385882	0	0.643529	5.27122	1.89987	1.91066	0.103936	0.180859	0.0634464	0.22752	1.26996	0.134695	0.244304	0.0348138	0.110095	2.50507	0.750848	0.256143	2.00542	0.0826225	0.171194	0.251023	0	0.0510571	0.0204674	0.151862	0.203014	0.0649097	0.0947634	1.1047	5.68843	0.505034	1.09022	0.584018	0.169604	15.265	0.0885352	0.145724	0	1.30314	3.35354	0.455991	0.129712	0.6815	0.837172
LOC109500629	0.0145323	1.08051	5.46652	7.88325	1.25422	0.712593	0.730703	0.118069	0.0445683	1.80923	0.989442	3.11064	0.699007	0.181965	1.45905	1.21126	3.39624	3.53312	1.86124	2.47135	0.884617	0.0183385	0.0800116	0.0267287	3.86721	0.146762	0.063575	0.09176	2.96852	13.4077	0.35332	0.730598	0.837584	0.146068	33.7543	0.758753	0.685093	4.23268	17.7304	14.1579	0.818792	0.671396	3.55992	7.74774
CATSPER3	0	2.34543	4.62574	6.40016	2.3028	0.882017	1.29773	0.222225	0.255796	1.90954	1.10664	2.90512	1.87798	0.321345	0.384682	0.620706	1.39973	1.4682	1.20579	1.13264	2.16453	0.642038	0.32896	0.0147507	1.80585	0.236187	0.0561358	0.155526	2.99474	21.9059	0.553759	0.508643	0.550172	0.173232	31.0078	1.56964	1.47294	1.12122	41.1725	32.6931	0.279334	0.463516	2.68905	12.1961
PITX1	0	3.42532	0	0.202911	1.60646	0.146688	78.2919	1.37539	0.0128442	11.7316	0	0	69.1309	9.02562	0.00295855	0	3.03119	19.7016	0	4.68177	2.74111	0.103586	0.161411	0	0	0.120065	0.0366435	0.0243167	14.7594	1.31585	6.0687	0.0323926	1.03619	20.8414	1.78898	0	0.0493595	0	1.22315	1.42676	0	192.218	0.192364	0.456312
LOC109500635	0	0	0	0	0.278079	0	5.35455	0	0	1.97433	0	0	13.5145	0.0235342	0	0	0.0876065	0.0557638	0	0.270664	0	0	0	0	0	0.0661287	0	0	3.19703	0.506163	0	0.196251	0	0.850118	0.184486	0	0	0	0.322193	0.394291	0	30.0229	0	0.148102
LOC102900331	0	0.0207471	0.00311005	0	0.0256881	0.00938243	0.108672	0	0	0.0208437	0	0	0.0659961	0.0121124	0.00141926	0.00797409	0.00693669	0.0739577	0.0149168	0.0419877	0.204052	0.398435	0.017975	0	0	0.0506154	0.00585946	0.000972089	0.0421902	1.60813	0.0586156	0.0258986	0.0338913	0.026925	1.65796	0	0.00526187	0	3.79693	2.49053	0.0137209	0.245284	0.0410131	0.639759
LOC109500634	0.00186282	0	0.00432547	0	0	0.00652456	0.0496709	0	0.0028565	0.0289895	0	0	0.00437084	0	0	0	0	0.0317282	0	0.000811065	1.54674	2.13869	0	0	0	0.0691823	0	0	0.0142251	1.66409	0	0.010806	0.0104747	0.00146852	1.17327	0	0.0109773	0	1.34631	1.59061	0	0.00735098	0	0.0801888
MACROH2A1	0.192962	54.5825	17.6144	33.4584	12.4116	18.2123	33.1375	17.7627	7.12204	67.177	10.6861	20.514	44.3193	13.3532	3.86943	21.5714	11.9246	6.08598	19.2663	23.2546	17.6971	10.5689	25.3748	0.537492	19.1888	10.2173	7.54142	41.5713	39.1708	9.71979	20.1317	29.9583	28.6001	17.956	5.84954	19.619	15.9773	22.0658	7.67619	9.6795	84.7743	22.402	22.3232	8.05825
LOC123385891	0.00727423	2.05421	1.66959	1.01374	1.23108	0.653121	1.86876	0.791755	0.410357	2.10296	0.53718	0.733613	2.84017	0.716084	0.489188	1.31005	0.830323	0.511882	0.619287	2.14597	3.10541	0.889349	1.42237	0.0096485	0.677229	0.710476	0.470612	2.47963	1.44906	1.52191	1.19855	1.55263	1.37105	1.35605	1.63406	0.64858	0.717869	0.831182	0.813753	1.55603	2.81021	2.16881	1.93829	0.630848
LOC123385894	0	41.1833	20.0761	20.6657	29.3108	3.00985	16.5139	7.00432	0.699206	45.9874	14.4083	10.2511	7.73608	3.48506	4.45073	18.3763	6.96343	5.35743	2.92976	20.6663	20.7694	1.96523	6.27627	0.0483844	10.7699	2.83381	1.22756	4.31489	20.8249	13.2942	28.0563	18.3798	24.1605	8.33675	11.0827	13.6042	6.78642	13.7186	6.65627	10.5923	38.8061	8.59359	30.6099	5.08121
TIFAB	0.056357	0.299305	0.0373888	0	1.49999	4.5118	0.631757	0	0	0.0626454	0.219264	0	2.15352	0.10081	0.133654	2.06108	0.846086	0	0.0896646	0.361054	0.389932	0.0365749	0	0.0148079	0	1.3901	0.616369	57.3124	0.184439	0.341286	1.13531	4.03201	3.16898	5.5313	0.585373	0	4.70481	0	0.0681545	0.272672	0.824759	6.37267	0.338977	0.211467
LOC123385895	0	0.205908	0.173622	0.0191678	0.106227	0.0387989	0.0822824	0.0426316	0.0254796	0.107743	0.301687	0.0227994	0.0909706	0.115588	0.00684719	0.0824375	0.00776888	0	0.0308425	0.0412976	0.108809	0.0380223	0.0495543	0	0	0.0956322	0.00605761	1.90541	0.105738	0.165734	0.0134662	0.048194	0.0311444	0.0687701	0.453048	0	0.057118	0	0.234436	0.311911	0	0.0622073	0.053	0.0619635
NEUROG1	0	5.45903	0.46131	0	0.189331	0	3.63249	0	0.0132454	3.83104	0.196037	0	3.20224	0.00400583	0.00305097	0	0.00745587	0.00949171	0	0.816107	1.23213	2.93868	0	0	0	0.0675357	0.0377881	0.040122	3.8587	0.333852	0.0630027	0.133618	0	0.00680946	0.282617	0.463878	0	0.359407	0.255926	0.271895	0.442435	0.020976	0	0.109238
CXCL14	0.612901	462.692	244.031	103.192	183.8	843.468	413.235	4.85597	0.939837	272.959	16.377	424.279	415.375	4.49952	0.641282	1920.51	78.8015	6.73492	594.628	156.571	2.58559	8.95427	0.350184	0.691261	726.967	0.482218	0.480607	0.198074	17.5732	0.980423	1457.41	1436.22	2001.82	60.7746	1.38733	447.248	90.4837	513.264	4.79684	2.05274	5.68634	140.475	3.89515	5.38864
LOC109500655	0	0.0998526	1.40327	0	0.88309	0	0	0	0	0	0	0	0	0.0298949	0	0	0	0.0708351	0	0.256109	0.144343	0.00813461	0	0	0	0.168003	0	0.140355	0.615318	50.6937	0.156726	0.249292	0	0	95.6135	0	0.72808	0	105.354	61.1734	0	0.0391352	0	73.2098
LOC123385901	0	0.402252	1.56571	0.122548	0.776179	0.103358	0.130393	0.0100949	0	1.01031	0	0.99607	0.20772	0.00957967	0.0104231	0.105412	0.0191038	0	0.032865	0.180519	0.49044	1.99599	0	0	0.181219	0.0653719	0	1.10342	0.563359	22.8588	0.0860952	0.0456482	0.09956	0.0302424	43.3729	0.91564	0.434739	0.147342	41.9116	29.9291	0	0.116091	0	23.5163
SLC25A48	0	0.293485	3.06951	1.0491	0.644564	2.21203	0.17682	0.120177	0.0205794	0.368563	0.0716667	3.89957	0.307485	1.39817	2.84362	0.516999	1.15518	0.374321	3.07504	3.75717	1.56776	6.06385	0.017386	0.0824009	3.88245	0.0735541	0.0379898	0.432697	1.36544	0.0600401	2.71014	3.79332	2.64791	2.27156	0.252555	3.33514	1.31189	3.74136	0.130317	0.22522	0.258791	1.04366	0.95183	0.0702703
IL9	0	0.0533028	3.5956	0.148858	0.188562	0	0.0131078	0	0	0.133877	0	0.283296	0	0.00797915	0	0.204867	0.163364	0	1.43714	0.445726	0.0513683	0	0	0	0.528298	0.112103	0.112904	0.544445	0.361312	0.257418	0.209157	0.0665378	0.193494	0.0678183	0.625488	0.410663	0.0337965	0	1.82063	0.671837	0.352512	0.0772964	0	0.426812
LOC101080761	0	0.307159	0.2813	0.33883	0.0203737	0.043408	0.250207	0	0	0.462883	0	0.0408126	0.0596126	0.00402326	0.0604094	0	0.272789	0	0.0862664	0.0434381	0.507125	0.370654	0	0	0.0380542	0.0169574	0.0108436	0.00719583	0.111202	1.04686	0.00602637	0.0814781	0.048782	0.169023	2.19868	0.183031	0.0146065	0.123762	2.62024	1.77501	0	0.0481539	0	0.843048
LECT2	0	0.152156	0.670004	0.16997	0	0	0.280628	0	0	0	0	0.404344	0.518577	0	745.306	0	284.344	0.134924	0.205121	0.0801906	11.0179	2.02048	0	0	0	0.064001	0	0	0	3.50569	0.238821	0	0	0.048398	2.36579	0.183166	0.771795	0	3.32615	3.91878	0	0.0119269	0	6.96975
LOC109500665	0	0.291859	0.538467	0	0.397105	0	0.0993763	0.0123953	0	0.28194	0.0986812	0	0.0382581	0.00336076	0.282843	0.550089	0.0781904	0	0.0403542	0.149874	0.342569	0.60722	0	0	0	0.446199	0.190218	0.0178824	0.0276694	0.22588	0.105714	0.0560504	0.0814983	0.0428468	0.223933	0	0.345195	0	0.0306734	0.124162	0	0.130227	0.110952	0.0264367
TGFBI	11.0247	400.049	6.13502	4.67502	409.541	173.358	305.353	3.62498	2.18448	350.206	35.9783	8.14614	191.361	2.39691	64.9147	233.83	102.954	8.16633	3.53654	97.6366	35.3628	9.16558	1.12049	0.616321	7.97265	175.443	107.635	8.40783	15.0584	11.278	140.47	297.93	267.383	116.127	4.03087	18.9481	372.684	10.7746	8.2872	9.68307	18.4756	308.464	94.442	31.545
LOC109500666	0.0956435	1.70375	0.360887	0	2.55498	0.334993	1.4573	0	0.0366655	2.23263	0.813996	0.393703	0.589086	0.0997994	2.15785	5.69418	0.626913	0.236472	0.133149	0.51533	0.11898	0.0422429	0.16456	0	0	7.11969	3.34733	2.3393	0.0912952	0.655856	2.49976	3.46759	2.21845	0.857663	0.260777	0.285354	2.09007	0.59694	0	0.209599	0.244947	2.55051	2.83716	0.151195
LOC123385921	0	0.195333	0	0	0.0431879	0	0.46834	0	0	0.398617	0	0	0.00462314	0	0.0013919	0.117306	0.0748328	0	0	0.014584	1.00266	1.63109	0	0	0	0.218244	0.0689582	0	0.0150462	0.0343923	0	0.0152396	0	0.0574718	0.0358151	0	0	0	0	0.0172718	0	0.054786	0	0.00670874
SMAD5	0.110648	115.465	34.5968	49.0437	74.5212	19.0458	43.4921	44.9311	27.1494	109.07	33.4251	41.1477	101.138	48.7823	8.0694	53.5924	34.9451	16.3221	26.7618	75.292	48.0306	23.9763	63.6976	1.1086	30.6367	7.6551	5.17174	13.9435	60.9967	58.6301	53.0031	55.0922	59.4341	29.4093	51.0591	46.2775	16.1235	28.3988	26.3192	28.5511	33.9153	54.3757	43.6443	31.9547
SMIM32	0	0.791689	11.6962	0.589582	3.11184	2.46638	0.41533	0.0194267	0	0.706998	0.0515531	1.72983	2.07863	0.0316031	0.0160466	0.540947	1.08084	0.0124805	5.43912	0.479673	0.595294	0.0171989	0	0.0417795	20.9244	0.148002	0.0496869	0.379182	0.9974	2.7613	2.43	2.98675	1.53275	0.622277	0.867083	3.25304	0.490813	30.2922	0.28844	1.0137	0	0.442675	0	0.295558
LOC123385926	0.00458455	0	0.425812	0	0	0	0	0	0.0140601	0.0713453	0	0	0	0	0	0	0.0613372	0	0	0.0119766	1.55581	3.39713	0	0	0.0938463	0.131431	0	0	0.15754	0.291512	0	0.0354591	0	0.0072283	2.8	0	0	0	0.271668	0.557144	0	0.00222662	0	0.0423691
TRPC7	0	0.1361	1.00309	0.993285	0.00802439	0.00512901	0.0401624	0	0.00449103	0.227889	0	0.735406	0.0893349	0.00407469	0	0	0.00948006	0	0.195707	0.303491	0.172938	0.481939	0	0.00808016	0.76439	0.0400731	0.0128126	0	1.29157	1.94809	0	0.0226525	0	0.0196251	4.17904	0.244664	0.0172588	0.621496	1.4132	2.0556	0.0300028	0.012802	0	0.729379
LOC111556734	0	0	0.828145	0	0	0	0	0	0	0	0	0	0	0	0	0	0	0	0	0	0	0	0	0	0	0.116189	0.390065	0	0	0.889334	0	0	0	0	7.13115	0	0	0	0	0.852643	0	0	0	0
LOC109500673	0	0.00469745	0.0651348	0	0	0.0106216	0	0	0	0	0	0	0	0	0	0	0.00458082	0	0	0	0.00804795	0.0371203	0	0	0	0.014819	0	0	0	0.828971	0.00737301	0.0117277	0	0	2.39785	0	0.00297841	0.0883266	1.50821	1.07087	0	0.0025775	0	1.29805
LOC123385937	0.297443	0.229533	0.308397	0.0110092	0.176064	0.0167133	0.135211	0	0.000609768	0.148519	0.043319	0.02619	0.233258	2.23767	0.00939362	0.0378789	0.0616253	0.000699139	0.109211	0.0243152	0.0730692	0.00428739	0.00875752	0	0.0854696	3.45316	1.37847	6.46473e-05	0.0251429	0.790874	0.0309376	0.0571451	0.017888	0.00626963	0.97562	0.227788	0.0506153	0.198549	0.363555	0.401241	0.0488833	0.0609638	0	0.0843311
LOC109500676	0.0793934	0	0.184351	0	0	0.0463461	0	0	0	0	0	0	0.062095	0.0153413	0	0	0.00571082	0	0	0	0.131686	0.180338	0	0	0	0.0862149	0.0868314	0	0	1.96323	0	0.179103	0.148811	0.0208628	2.18875	0	0.0129959	0	6.16085	2.623	0	0.00106039	0	1.55113
LOC123385944	0.0440554	0	0.0681977	0	0.0134117	0.0514349	0.0149169	0	0.0150124	0	0	0	0.0114855	0.0136206	0	0	0.0542944	0	0	0	0.0649534	0.112424	0	0	0	0.0446513	0.0535364	0	0	1.67223	0	0.0473258	0	0.00771785	3.30106	0	0	0.488823	1.14991	1.70662	0	0.000392275	0	0.376195
LOC123385941	0	0.0243064	0.100527	0	0	0	0.0145931	0	0.00541935	0.00687487	0	0.00581914	0	0.00508085	0.00312076	0	0.0418157	0.0116506	0	0.00028467	0.094635	0.338945	0	0	0	0.087502	0.046383	0	0.00337348	3.06679	0.00429626	0	0.0198727	0.00139304	6.19276	0	0.0104131	0.0294103	0.516082	1.82226	0.0302307	0.000287508	0.00676367	0.342947
LOC109500675	0.0201247	0.0235077	0.146317	0.00799212	0	0.00346658	0.0359417	0	0.00202359	0.0154025	0	0.0108643	0.00503161	0.0402389	0.000699176	0	0.00370202	0	0.0146971	0.00272922	3.4157	0.641137	0.000908216	0	0.0337669	0.0922161	0.0187627	0	0.00755795	0.986369	0.0128338	0.102068	0.0445228	0.00312098	3.12375	0.0314977	0.00486033	0.0137273	0.295342	0.851784	0	0.00252366	0	0.117626
SPOCK1	0	60.0046	182.717	838.917	47.7063	6.19093	11.7391	0.168728	0.314879	43.8219	0.0456896	371.173	164.76	0.261414	0.0412425	4.29681	12.2228	0.294222	493.125	92.5437	15.4663	4.42294	0.199514	0.10738	544.137	0.0459091	0.00880712	0.0239622	387.462	21.7491	3.68074	12.7331	14.1898	1.50611	34.0173	281.896	3.30988	405.97	60.8024	26.0761	1.21678	13.2787	2.75862	20.216
LOC109500677	0	0.155129	9.2484	1.45371	0.289634	0.00974355	0.0233127	0	0	0.519503	0	0.251926	0.0261091	0.0322528	0.00491295	0.016562	0.0084043	0.0152844	0.170401	0.0381534	0.0295307	0.021765	0.01053	0	0.256254	0.0870018	0.018255	0	0.446107	32.641	0.0405811	0.0753073	0.0625703	0.00657913	30.4914	0.0995973	0.054644	0.20835	36.543	23.2632	0.028498	0.00405331	0	16.9587
LOC101083138	0	0	0	0	0	0	0	0	0	0	0	0	0	0	0	0	0.262163	0	0	0	0	0	0	0	0	0.093125	0	0	0	0.534599	0	0	0	0	0.5196	0	0	0	0	0.284747	0	0	0	0
KLHL3	3.48828e-05	0.330327	2.39718	2.95749	0.674817	0.11448	0.225657	0.0193912	0.0141214	0.412295	0.552009	2.05736	0.699741	0.126748	0.085405	0.417707	0.316328	1.52119	0.457904	1.27546	0.552278	0.181584	0.0704532	0.00537842	1.30624	0.0176669	0.00691903	0.003227	1.49112	0.771156	0.651451	0.258873	0.339072	0.0889876	1.19344	1.46237	0.0621474	1.29942	0.539406	0.819617	0.159733	0.538258	0.436068	0.385048
HNRNPA0	0.330451	492.815	86.7799	168.624	132.158	110.066	301.832	167.113	42.7117	520.1	51.9655	140.808	500.736	168.284	15.4728	118.549	60.4227	15.579	99.085	85.0209	155.315	6.6774	183.905	4.38685	140.661	28.8302	23.3867	358.383	174.716	144.931	101.438	97.7826	91.1087	114.211	188.152	95.14	95.2293	180.076	121.201	135.744	254.654	87.9809	160.185	82.2488
LOC123385975	0	10.8706	9.91094	3.15871	1.50922	0.233349	1.2756	0.0113955	0.0306485	3.888	1.91544	1.09698	0.646234	0.0494351	0.674571	0.529123	0.487832	0.168382	1.19979	0.795791	1.19495	2.65448	0.0489695	0.0162975	2.90895	0.292226	0.0390555	0.00321066	3.67982	6.57306	0.734092	0.309178	0.361887	0.0315128	16.0096	1.0201	0.183214	0.462387	1.89895	4.32873	0.88725	0.0690187	0.35701	1.47991
MYOT	0.000744881	8.3368	3.3514	0.675386	13.7079	0.331337	2.40686	0.0458669	0.0513999	5.19319	1.16423	0.551916	0.755625	0.121251	0.296162	0.218807	6.49409	474.151	0.486714	0.952958	0.468669	0.762261	0.0854476	0.00524723	0.744551	0.0617921	0.0174013	0.0963721	1.92447	4.42929	150.845	0.187241	65.9171	0.345282	8.22131	0.718536	0.0834001	0.677766	4.13129	2.64317	1.0683	57.2697	0.193876	1.58211
PKD2L2	0.0224341	0.69149	1.74739	0.96703	0.835628	0.173065	0.427927	0.555184	0.5404	0.682776	0.26553	1.0918	1.40058	0.301056	0.140826	0.740509	0.567205	0.328588	0.901357	1.54917	0.860076	0.102919	0.384232	0.00887921	0.941709	1.0724	0.69073	0.596046	0.78392	5.66134	0.415635	0.565574	0.514171	0.752866	14.6869	0.843857	0.39716	1.03034	6.90655	5.33475	1.632	0.705605	0.958686	4.29839
FAM13B	0.293327	4.53108	5.59995	6.40781	3.8916	1.34631	3.04991	2.44496	2.04597	4.46426	1.75548	7.09761	5.37124	1.05438	0.647971	5.30828	1.86749	0.864167	5.30517	5.28307	3.01041	0.491581	1.69731	0.0863509	7.05273	3.9374	2.81299	1.82894	4.8748	8.07735	2.8658	2.77941	3.38589	2.73445	13.9583	5.46281	3.37681	5.37401	8.43349	7.31063	10.9489	2.5165	6.02644	6.77873
LOC123385977	0.433656	42.2008	65.8663	70.403	40.6769	10.5429	25.3418	22.4706	22.6875	50.0192	20.2628	75.3936	37.1691	8.8962	4.7934	48.9022	11.3066	7.06381	51.4217	35.7411	27.079	1.72541	20.365	0.703773	76.76	43.0473	31.8049	13.7521	49.8677	105.94	28.4052	23.1828	38.5851	23.0257	174.993	49.4696	22.5483	51.7965	114.234	85.9881	102.96	12.9716	50.7723	60.9473
TRNAL-UAG	0	2.88355	9.4555	0.805283	2.55019	0	4.07733	0.39801	0	3.62121	0.528105	0	0	0.107913	5.91769	1.38535	0.251067	3.45192	0	0.303942	0.771916	0.117456	0	0	0	7.5806	4.0719	0.303989	1.77692	8.99366	6.78892	2.69965	5.23378	0.55032	27.4929	0	1.14269	0	0	7.46366	9.53502	0.141268	3.56264	0.452735
LOC111556732	0.0867313	1.07478	3.42363	0	0.475263	0	0.528602	0	0.265992	0	0.393678	0	0	0.120667	0.8884	1.03272	0.0374319	1.52489	0	0.3021	0.345257	0.087558	0	0	0	4.29476	3.03542	0.0755366	0.993458	6.70436	1.68694	0	0	0.205119	34.0527	0	0.34073	0	0.73421	3.17932	0	0.0421237	0	0.337493
TRNAE-CUC_1	0	0	0	0	0	0	0	0	0	0	0	0	0	0	0	0	0.169213	0	0	0	0	0	0	0	0	0.681216	0	0	0	1.30354	0	0	0	0	5.22626	0	0	0	1.10634	2.23916	0	0	0	1.14424
LOC109500706	0	0	0.122223	0	0.0721088	0	0	0	0.0201787	0	0	0	0	0	0.002324	0	0.0141983	0	0.512943	0.0171884	0.0174613	0	0.00452824	0	0	0.111461	0	0	0.12561	3.66689	0	0	0	0.0155608	6.243	0.0785216	0	0	10.4296	3.51168	0	0	0	5.12058
WNT8A	0	0.0467849	0.0438324	0	0	0	0.02301	0	0.0115786	0	0	0.0621637	0	0.0385191	0.00266703	0.044954	0.0146646	0	0.252282	0	0.0100193	0	0	0	0	0.113154	0.0330328	0	0	2.67363	0	0	0	0	5.47632	0	0.0296639	0	2.54083	2.96949	0.0773518	0.0096266	0	1.14836
LOC123385976	0	0	0.0455352	0	0	0	0	0	0	0	0.0445063	0	0	0.00568402	0	0.116751	0.016927	0.0107745	0	0	0.0195161	0.00742398	0	0	0	0.191658	0.0428951	0	0	3.22738	0	0	0.0551349	0	9.39266	0	0	0	0.373519	2.71428	0	0	0	0.827474
NME5	0	0	0.431255	0.067657	0.107129	0	0.059576	0	0	0.15212	0	1.12665	0.137614	0.183596	0.0207159	0.116392	2.14313	0.139638	0.217731	0.0340481	0.791214	0.143089	0	0.0359578	0	0.140117	0.213816	0.0227023	0.14929	49.5293	0	0	0	0.11559	112.756	2.44978	0.537627	0.976144	90.4447	53.5482	0.100137	0.0142426	1.34694	53.9794
BRD8	0.0221667	13.8803	6.98201	7.26412	7.60663	3.12532	7.35731	3.42599	2.16886	15.0104	4.89311	6.50249	15.4824	2.75557	1.38775	9.95683	6.39168	2.35291	6.38945	10.6272	14.0811	12.3661	4.9546	0.448833	6.97152	3.52682	2.51451	3.78788	9.92615	20.2754	6.40293	7.55199	8.27436	3.81394	34.8636	5.99158	6.72243	6.49028	20.3706	24.1353	19.8177	4.94218	12.182	12.5457
KIF20A	0	52.9863	2.56227	2.77864	2.75857	7.09006	32.9811	18.1114	0.789862	55.9881	2.08255	3.07775	11.7944	18.3536	0.152678	4.64107	0.598168	0.606865	0.963997	3.75619	27.7607	41.1615	33.8889	0.0419981	2.80451	0.997841	0.803795	12.7184	1.89372	15.3972	3.32065	11.9726	14.488	5.14743	24.2741	1.70474	4.07222	2.51887	18.2825	13.6177	36.1212	3.93957	3.95943	7.77107
CDC23	0.39979	62.5582	41.3774	56.7257	29.3658	12.6915	32.44	24.7667	12.2387	68.3243	27.616	54.5767	34.3496	27.4509	3.08994	29.2328	10.5283	11.3283	32.0782	52.1631	26.3292	24.0803	50.5641	1.22999	53.6036	37.9549	34.6775	24.7161	54.432	24.2428	24.8656	31.006	33.0052	13.8645	49.7458	53.892	21.1175	40.5887	37.1356	33.1754	60.502	17.7529	30.9108	22.6034
GFRA3	0.0020495	3.21914	0.0547279	0.0354636	3.8044	8.01829	2.0017	0.164762	0.00628552	2.21668	1.62799	0.067492	1.39938	0.228113	0.399597	0.597889	3.14717	0.474633	0	1.89757	1.86764	1.82127	0.382955	0.0301567	0	0.355205	0.143457	0.0498304	0.903823	1.64816	1.77392	1.91807	1.96492	0.189036	3.25226	0.0764341	21.2482	0.0682217	4.04683	3.15909	0.776833	0.846715	8.01727	1.45945
CDC25C	0.0341674	3.4705	0.295661	0.28063	0.250885	0.232163	2.25784	0.856363	0.0695082	5.17538	0.193343	0.285041	0.650436	0.67406	0.0411932	0.474639	0.0785476	0.0891071	0.052005	0.491961	1.61431	2.28068	1.67833	0.0117307	0.22148	0.176314	0.089684	0.550377	0.153938	5.38568	0.344465	1.16894	1.08102	0.60353	11.5923	0.148151	0.369577	0.0701352	6.46255	5.86723	5.69827	0.516861	0.233659	2.86914
[truncated: 34,405 more rows]
